# Supplementary material for: Single-Cell Transcriptomics of Cultured Amniotic Fluid Cells Reveals Complex Gene Expression Alterations in Human Fetuses With Trisomy 18
Source: Front Cell Dev Biol. 2022 Mar 22;10:825345. doi: 10.3389/fcell.2022.825345 (PMC8980718; doi:10.3389/fcell.2022.825345)
Supplement: Supplementary file 2 [file DataSheet1.xlsx]

## Sheet: Supplemental_Table_S1
Table S1. Sequencing statistics of single T cells, Related to Figure 1.
Patient ID	Cell ID	Type	sex	Gestational period	Pre-Normalization Total Reads per Cell	Estimated number of cells	Mean reads per cell	Median genes per cell	Mapping Rate (%)
W1	N-1	normal	male	Second Trimester	60232	9325	60232	3920	0.924
W2	T18-1	trisomy18	male	Second Trimester	62709	9346	62709	3695	0.923
W6	N-2	normal	male	Second Trimester	65595	9277	65695	3113	0.949
W8	T18-3	trisomy18	female	Second Trimester	57861	10860	57861	3834	0.941
W9	T18-2	trisomy18	male	Second Trimester	60610	10472	60610	3113	0.939

## Sheet: Supplemental_Table_S2
	ID	Description	GeneRatio	BgRatio	pvalue	p.adjust	qvalue	geneID	Count	cluster
GO:2000027	GO:2000027	regulation of animal organ morphogenesis	16/152	208/18493	1.64e-11	1.64e-11	1.2e-08	STAT1/TGFB2/PRICKLE2/PRICKLE1/TNFAIP3/SMURF2/NFIB/NTN4/DAB2/SULF2/LIF/JAG1/SOX9/TGFBR1/TNFRSF11B/VEGFA	16	7
GO:0061448	GO:0061448	connective tissue development	17/152	263/18493	5.87e-11	5.87e-11	3.21e-08	COL5A1/TGFBI/ARRDC3/CTGF/COL1A1/HMGA2/NFIB/ANXA6/PDGFB/CYR61/COL6A1/SULF2/COL6A2/SOX9/TGFBR1/ITGB8/MATN2	17	7
GO:0050673	GO:0050673	epithelial cell proliferation	20/152	420/18493	2.62e-10	2.62e-10	1.15e-07	SPARC/DLG1/IGFBP5/STAT1/EPPK1/TGFB2/COL8A1/TNFAIP3/NFIB/PDGFB/IGFBP3/B4GALT1/SULF2/SOX9/MCC/TGFBR1/F3/NRP2/CDH13/VEGFA	20	7
GO:0002009	GO:0002009	morphogenesis of an epithelium	21/152	479/18493	4.08e-10	4.08e-10	1.49e-07	COL5A1/DLG1/IGFBP5/SOX4/STAT1/TNC/IRX2/TGFB2/PRICKLE2/PRICKLE1/SMURF2/VCL/NTN4/DAB2/CYR61/LIF/JAG1/SOX9/HBEGF/RHOB/VEGFA	21	7
GO:0051216	GO:0051216	cartilage development	14/152	206/18493	1.64e-09	1.64e-09	5.14e-07	TGFBI/CTGF/COL1A1/HMGA2/NFIB/ANXA6/CYR61/COL6A1/SULF2/COL6A2/SOX9/TGFBR1/ITGB8/MATN2	14	7
GO:0002062	GO:0002062	chondrocyte differentiation	11/152	117/18493	3.3e-09	3.3e-09	9.05e-07	TGFBI/CTGF/HMGA2/NFIB/ANXA6/COL6A1/SULF2/COL6A2/SOX9/TGFBR1/MATN2	11	7
GO:0050678	GO:0050678	regulation of epithelial cell proliferation	17/152	368/18493	9.92e-09	9.92e-09	2.42e-06	SPARC/DLG1/STAT1/EPPK1/TGFB2/TNFAIP3/NFIB/PDGFB/B4GALT1/SULF2/SOX9/MCC/TGFBR1/F3/NRP2/CDH13/VEGFA	17	7
GO:0048608	GO:0048608	reproductive structure development	18/152	428/18493	1.52e-08	1.52e-08	3.34e-06	DLG1/INHBA/TNC/SPP1/HSPA5/TGFB2/PDGFB/CYR61/SERPINE2/LIF/TNFSF10/SOX9/TGFBR1/ICAM1/CASP3/SDC1/ITGB8/VEGFA	18	7
GO:0061458	GO:0061458	reproductive system development	18/152	431/18493	1.7e-08	1.7e-08	3.37e-06	DLG1/INHBA/TNC/SPP1/HSPA5/TGFB2/PDGFB/CYR61/SERPINE2/LIF/TNFSF10/SOX9/TGFBR1/ICAM1/CASP3/SDC1/ITGB8/VEGFA	18	7
GO:0001822	GO:0001822	kidney development	18/187	271/18493	3.17e-10	3.17e-10	2.56e-07	*SOX4/*FBN1/STAT1/AKR1B1/DLG1/GCNT3/DCN/TGFB2/EPCAM/TACSTD2/LHX1/PROM1/FOXC1/CDKN1C/BMP4/SULF2/POU3F3/WNT7B	18	3
GO:0001655	GO:0001655	urogenital system development	19/187	322/18493	7.37e-10	7.37e-10	3.66e-07	*SOX4/*FBN1/STAT1/AKR1B1/DLG1/TNC/GCNT3/DCN/TGFB2/EPCAM/TACSTD2/LHX1/PROM1/FOXC1/CDKN1C/BMP4/SULF2/POU3F3/WNT7B	19	3
GO:0072001	GO:0072001	renal system development	18/187	286/18493	7.55e-10	7.55e-10	3.66e-07	*SOX4/*FBN1/STAT1/AKR1B1/DLG1/GCNT3/DCN/TGFB2/EPCAM/TACSTD2/LHX1/PROM1/FOXC1/CDKN1C/BMP4/SULF2/POU3F3/WNT7B	18	3
GO:0033002	GO:0033002	muscle cell proliferation	13/187	236/18493	8.63e-07	8.63e-07	0.000283489	SOD2/STAT1/AKR1B1/GSTP1/CDKN1A/CYBA/TGFB2/IL18/CX3CL1/IGFBP3/MDM2/FOXC1/BMP4	13	3
GO:0048660	GO:0048660	regulation of smooth muscle cell proliferation	11/187	168/18493	1.15e-06	1.15e-06	0.000283489	SOD2/STAT1/AKR1B1/GSTP1/CDKN1A/CYBA/IL18/CX3CL1/IGFBP3/MDM2/BMP4	11	3
GO:0072006	GO:0072006	nephron development	10/187	136/18493	1.24e-06	1.24e-06	0.000283489	STAT1/DLG1/TACSTD2/LHX1/PROM1/FOXC1/BMP4/SULF2/POU3F3/WNT7B	10	3
GO:0110111	GO:0110111	negative regulation of animal organ morphogenesis	6/187	35/18493	1.25e-06	1.25e-06	0.000283489	STAT1/TNFRSF11B/TGFB2/TACSTD2/FOXC1/BMP4	6	3
GO:0072073	GO:0072073	kidney epithelium development	10/187	140/18493	1.62e-06	1.62e-06	0.000303423	STAT1/DLG1/EPCAM/TACSTD2/LHX1/PROM1/FOXC1/BMP4/POU3F3/WNT7B	10	3
GO:0072009	GO:0072009	nephron epithelium development	9/187	109/18493	1.63e-06	1.63e-06	0.000303423	STAT1/DLG1/TACSTD2/LHX1/PROM1/FOXC1/BMP4/POU3F3/WNT7B	9	3
GO:0002009	GO:0002009	morphogenesis of an epithelium	18/187	479/18493	1.87e-06	1.87e-06	0.00032272	*SPINT2/*SOX4/STAT1/DLG1/RHOB/TNC/SHROOM3/TGFB2/TACSTD2/DDR1/ALDH1A3/NTN4/PRICKLE1/LHX1/BMP4/WNT7A/SPINT1/WNT7B	18	3
GO:0051216	GO:0051216	cartilage development	13/90	206/18493	2.15e-11	2.15e-11	1.41e-08	*GREM1/*CTGF/*COL6A2/*COL6A1/COL1A1/*COL6A3/*PRRX1/WNT5A/TGFBI/CYR61/SERPINH1/ANXA6/WNT5B	13	12
GO:0061448	GO:0061448	connective tissue development	13/90	263/18493	4.49e-10	4.49e-10	2.21e-07	*GREM1/*CTGF/*COL6A2/*COL6A1/COL1A1/*COL6A3/*PRRX1/WNT5A/TGFBI/CYR61/SERPINH1/ANXA6/WNT5B	13	12
GO:0002062	GO:0002062	chondrocyte differentiation	9/90	117/18493	5.47e-09	5.47e-09	2.15e-06	*GREM1/*CTGF/*COL6A2/*COL6A1/*COL6A3/TGFBI/SERPINH1/ANXA6/WNT5B	9	12
GO:0060351	GO:0060351	cartilage development involved in endochondral bone morphogenesis	6/90	46/18493	8.99e-08	8.99e-08	2.94e-05	*COL6A2/*COL6A1/COL1A1/*COL6A3/SERPINH1/ANXA6	6	12
GO:0003413	GO:0003413	chondrocyte differentiation involved in endochondral bone morphogenesis	5/90	29/18493	2.64e-07	2.64e-07	6.48e-05	*COL6A2/*COL6A1/*COL6A3/SERPINH1/ANXA6	5	12
GO:0060350	GO:0060350	endochondral bone morphogenesis	6/90	71/18493	1.25e-06	1.25e-06	0.000222532	*COL6A2/*COL6A1/COL1A1/*COL6A3/SERPINH1/ANXA6	6	12
GO:0048705	GO:0048705	skeletal system morphogenesis	9/90	236/18493	2.22e-06	2.22e-06	0.000334979	*GREM1/*CTGF/*COL6A2/*COL6A1/COL1A1/*COL6A3/*PRRX1/SERPINH1/ANXA6	9	12
GO:0060828	GO:0060828	regulation of canonical Wnt signaling pathway	9/90	236/18493	2.22e-06	2.22e-06	0.000334979	*GREM1/COL1A1/DKK1/WNT5A/SMURF2/IGFBP4/WNT5B/SOX4/IGFBP2	9	12
GO:0030510	GO:0030510	regulation of BMP signaling pathway	6/90	88/18493	4.42e-06	4.42e-06	0.00057797	*GREM1/DKK1/WNT5A/FBN1/SMURF2/CYR61	6	12
GO:0030514	GO:0030514	negative regulation of BMP signaling pathway	5/90	51/18493	4.8e-06	4.8e-06	0.000589502	*GREM1/DKK1/WNT5A/FBN1/SMURF2	5	12
GO:0010634	GO:0010634	positive regulation of epithelial cell migration	7/80	165/18493	7.29e-06	7.29e-06	0.00434851	EDN1/FGF1/PFN1/HSPB1/TGFB2/HBEGF/SPARC	7	2
GO:0006936	GO:0006936	muscle contraction	9/80	351/18493	2.04e-05	2.04e-05	0.00879661	MYL9/CALD1/TPM2/EDN1/CNN1/MYL12A/CTGF/MYL6/CALM1	9	2
GO:0003012	GO:0003012	muscle system process	10/80	456/18493	2.65e-05	2.65e-05	0.00912296	MYL9/CALD1/TPM2/EDN1/CNN1/MYL12A/CTGF/MYL6/IGFBP5/CALM1	10	2
GO:0060326	GO:0060326	cell chemotaxis	8/80	295/18493	4.09e-05	4.09e-05	0.0111858	EDN1/FGF1/CCL2/HSPB1/TGFB2/HBEGF/SBDS/DUSP1	8	2
GO:0071560	GO:0071560	cellular response to transforming growth factor beta stimulus	7/80	242/18493	8.5e-05	8.5e-05	0.0182801	ANKRD1/EDN1/DAB2/BAMBI/TGFB2/FERMT2/SMURF2	7	2
GO:0071559	GO:0071559	response to transforming growth factor beta	7/80	249/18493	0.000101519	0.000101519	0.0194133	ANKRD1/EDN1/DAB2/BAMBI/TGFB2/FERMT2/SMURF2	7	2
GO:0001667	GO:0001667	ameboidal-type cell migration	9/80	456/18493	0.000153259	0.000153259	0.0249306	EDN1/FGF1/PFN1/HSPB1/TGFB2/HBEGF/SPARC/ARID5B/SMURF2	9	2
GO:0031032	GO:0031032	actomyosin structure organization	6/80	189/18493	0.000168915	0.000168915	0.0249306	ANKRD1/EDN1/CNN1/CTGF/PFN1/FRMD6	6	2
GO:0010632	GO:0010632	regulation of epithelial cell migration	7/80	284/18493	0.000228315	0.000228315	0.0289795	EDN1/FGF1/PFN1/HSPB1/TGFB2/HBEGF/SPARC	7	2
GO:0001503	GO:0001503	ossification	8/80	380/18493	0.000235736	0.000235736	0.0289795	ISG15/CTGF/IGFBP5/TGFB2/SPARC/FHL2/SBDS/TUFT1	8	2
GO:0006937	GO:0006937	regulation of muscle contraction	5/80	164/18493	0.000725793	0.000725793	0.0441171	MYL9/EDN1/CNN1/CTGF/CALM1	5	2
GO:0002009	GO:0002009	morphogenesis of an epithelium	16/151	479/18493	1.98e-06	1.98e-06	0.00148773	*EDN1/*IGFBP5/SOX4/TGFB2/VCL/TNC/HBEGF/SPINT2/DLG1/PFN1/NTN4/WNT7B/DAB2/FGF1/SMURF2/BMP4	16	9
GO:0045216	GO:0045216	cell-cell junction organization	9/151	155/18493	5.18e-06	5.18e-06	0.00292161	CAV1/CD9/TGFB2/VCL/DLG1/CRB3/TGFBR1/CLDN6/LIMS2	9	9
GO:0050680	GO:0050680	negative regulation of epithelial cell proliferation	9/151	162/18493	7.42e-06	7.42e-06	0.00295012	CAV1/TGFB2/DLG1/EPPK1/TGFBR1/NR2F2/BMP4/LIMS2/MCC	9	9
GO:2000027	GO:2000027	regulation of animal organ morphogenesis	10/151	208/18493	8.25e-06	8.25e-06	0.00295012	*EDN1/TGFB2/PFN1/NTN4/TGFBR1/DAB2/FGF1/SMURF2/BMP4/LIMS2	10	9
GO:0050673	GO:0050673	epithelial cell proliferation	14/151	420/18493	9.15e-06	9.15e-06	0.00295012	*F3/*IGFBP5/CAV1/TGFB2/DLG1/EPPK1/COL8A1/TGFBR1/FGF1/PDGFB/NR2F2/BMP4/LIMS2/MCC	14	9
GO:0048608	GO:0048608	reproductive structure development	14/151	428/18493	1.13e-05	1.13e-05	0.00306898	KRT19/TGFB2/TNC/ARID5B/CASP3/SPINT2/DLG1/KRT8/WNT7B/TGFBR1/PDGFB/NR2F2/SDC1/BMP4	14	9
GO:0061458	GO:0061458	reproductive system development	14/151	431/18493	1.22e-05	1.22e-05	0.00306898	KRT19/TGFB2/TNC/ARID5B/CASP3/SPINT2/DLG1/KRT8/WNT7B/TGFBR1/PDGFB/NR2F2/SDC1/BMP4	14	9
GO:0042326	GO:0042326	negative regulation of phosphorylation	14/151	448/18493	1.88e-05	1.88e-05	0.00400761	EZR/GPRC5A/CAV1/CASP3/CALM1/DLG1/DYNLL1/DUSP4/DUSP1/GADD45A/NR2F2/SH3RF2/BMP4/MECOM	14	9
GO:0010632	GO:0010632	regulation of epithelial cell migration	11/151	284/18493	2.22e-05	2.22e-05	0.00400761	*EDN1/TGFB2/HBEGF/PFN1/EPPK1/ANXA3/FGF1/PDGFB/NR2F2/BMP4/MCC	11	9
GO:0001667	GO:0001667	ameboidal-type cell migration	14/151	456/18493	2.29e-05	2.29e-05	0.00400761	*EDN1/TGFB2/ARID5B/HBEGF/PFN1/EPPK1/ANXA3/TGFBR1/FGF1/PDGFB/NR2F2/SMURF2/BMP4/MCC	14	9
GO:0006936	GO:0006936	muscle contraction	12/151	351/18493	3.2e-05	3.2e-05	0.00400761	*EDN1/CALD1/TPM2/MYL9/CAV1/VCL/CALM1/DLG1/CNN1/MYL12A/EDN2/FKBP1B	12	9
GO:0033627	GO:0033627	cell adhesion mediated by integrin	5/85	65/18493	1.21e-05	1.21e-05	0.00417422	FBN1/ITGB8/EFNA1/PLAU/CYP1B1	5	0
GO:0048660	GO:0048660	regulation of smooth muscle cell proliferation	7/85	168/18493	1.23e-05	1.23e-05	0.00417422	GSTP1/STAT1/CYBA/AKR1B1/CDKN1A/SOD2/IGFBP3	7	0
GO:0097237	GO:0097237	cellular response to toxic substance	8/85	235/18493	1.25e-05	1.25e-05	0.00417422	GSTP1/SOD1/SOD2/RHOB/MAP1LC3A/GSTM3/CYP1B1/TP53INP1	8	0
GO:0048659	GO:0048659	smooth muscle cell proliferation	7/85	170/18493	1.32e-05	1.32e-05	0.00417422	GSTP1/STAT1/CYBA/AKR1B1/CDKN1A/SOD2/IGFBP3	7	0
GO:0001558	GO:0001558	regulation of cell growth	10/85	416/18493	2.07e-05	2.07e-05	0.00491009	CYBA/IGFBP7/SPP1/DDR1/BTG1/CDKN1A/IGFBP2/JADE1/L1CAM/IGFBP3	10	0
GO:0098754	GO:0098754	detoxification	6/85	123/18493	2.18e-05	2.18e-05	0.00491009	GSTP1/MT1F/SOD1/SOD2/GSTM3/TP53INP1	6	0
GO:0001890	GO:0001890	placenta development	6/85	149/18493	6.41e-05	6.41e-05	0.00841281	SPINT2/CDKN1C/SPP1/ITGB8/SOD1/KRT19	6	0
GO:0007566	GO:0007566	embryo implantation	4/85	52/18493	9.51e-05	9.51e-05	0.00881593	IGFBP7/SPP1/DDR1/SOD1	4	0
GO:0033002	GO:0033002	muscle cell proliferation	7/85	236/18493	0.00010689	0.00010689	0.00886504	GSTP1/STAT1/CYBA/AKR1B1/CDKN1A/SOD2/IGFBP3	7	0
GO:0048662	GO:0048662	negative regulation of smooth muscle cell proliferation	4/85	70/18493	0.000302502	0.000302502	0.0164372	GSTP1/CDKN1A/SOD2/IGFBP3	4	0
GO:0042119	GO:0042119	neutrophil activation	12/40	498/18493	3.59e-10	3.59e-10	3.23e-07	CYBA/PADI2/ANXA2/PLAU/CXCL1/LGALS3/GSTP1/CXCL8/RNASET2/ANXA3/NDUFC2/CTSC	12	1
GO:0043312	GO:0043312	neutrophil degranulation	11/40	485/18493	4.19e-09	4.19e-09	1.27e-06	CYBA/PADI2/ANXA2/PLAU/CXCL1/LGALS3/GSTP1/RNASET2/ANXA3/NDUFC2/CTSC	11	1
GO:0002283	GO:0002283	neutrophil activation involved in immune response	11/40	488/18493	4.47e-09	4.47e-09	1.27e-06	CYBA/PADI2/ANXA2/PLAU/CXCL1/LGALS3/GSTP1/RNASET2/ANXA3/NDUFC2/CTSC	11	1
GO:0002446	GO:0002446	neutrophil mediated immunity	11/40	499/18493	5.64e-09	5.64e-09	1.27e-06	CYBA/PADI2/ANXA2/PLAU/CXCL1/LGALS3/GSTP1/RNASET2/ANXA3/NDUFC2/CTSC	11	1
GO:0050819	GO:0050819	negative regulation of coagulation	3/40	56/18493	0.000240011	0.000240011	0.0236822	ANXA2/PLAU/PROCR	3	1
GO:0060326	GO:0060326	cell chemotaxis	5/40	295/18493	0.000415833	0.000415833	0.0236822	PADI2/CXCL1/LGALS3/GSTP1/CXCL8	5	1
GO:0048660	GO:0048660	regulation of smooth muscle cell proliferation	4/40	168/18493	0.000465365	0.000465365	0.0236822	CYBA/GSTP1/AKR1B1/IGFBP5	4	1
GO:0010273	GO:0010273	detoxification of copper ion	2/40	15/18493	0.000470531	0.000470531	0.0236822	MT2A/MT1E	2	1
GO:0061844	GO:0061844	antimicrobial humoral immune response mediated by antimicrobial peptide	3/40	71/18493	0.000483885	0.000483885	0.0236822	GAPDH/CXCL1/CXCL8	3	1
GO:0048659	GO:0048659	smooth muscle cell proliferation	4/40	170/18493	0.000486618	0.000486618	0.0236822	CYBA/GSTP1/AKR1B1/IGFBP5	4	1
GO:0022613	GO:0022613	ribonucleoprotein complex biogenesis	23/199	485/18493	2.74e-09	2.74e-09	7.18e-06	EBNA1BP2/C1QBP/NPM1/RAN/HSP90AB1/SNRPB/NOP16/GTF3A/FBL/SNRPD1/STRAP/NOP56/DKC1/LYAR/TAF9/EIF6/RUVBL1/MRPS7/RRP15/SBDS/EIF3E/WDR18/RRS1	23	4
GO:0042254	GO:0042254	ribosome biogenesis	16/199	282/18493	7.15e-08	7.15e-08	5.96e-05	EBNA1BP2/C1QBP/NPM1/RAN/NOP16/GTF3A/FBL/NOP56/DKC1/LYAR/EIF6/MRPS7/RRP15/SBDS/WDR18/RRS1	16	4
GO:0006403	GO:0006403	RNA localization	14/199	231/18493	2.16e-07	2.16e-07	9.44e-05	EIF5A/NPM1/HNRNPA1/RAN/CCT2/SRSF7/FBL/SRSF3/HNRNPA2B1/SSB/DKC1/EIF6/RUVBL1/RRS1	14	4
GO:0002446	GO:0002446	neutrophil mediated immunity	20/199	499/18493	4.78e-07	4.78e-07	0.000111028	ANXA3/PLAUR/FABP5/ANXA2/ALDOA/TUBB/HSP90AB1/CTSC/CCT2/ANPEP/PSMB1/IMPDH2/PSMA5/IL6/MGST1/LGALS3/PSMD7/GLIPR1/PLAU/PRDX4	20	4
GO:0051168	GO:0051168	nuclear export	12/199	194/18493	1.31e-06	1.31e-06	0.000215675	EIF5A/NPM1/HNRNPA1/RAN/SRSF7/TXN/SRSF3/HNRNPA2B1/ANP32B/SSB/EIF6/RRS1	12	4
GO:0043312	GO:0043312	neutrophil degranulation	19/199	485/18493	1.32e-06	1.32e-06	0.000215675	ANXA3/PLAUR/FABP5/ANXA2/ALDOA/TUBB/HSP90AB1/CTSC/CCT2/ANPEP/PSMB1/IMPDH2/PSMA5/MGST1/LGALS3/PSMD7/GLIPR1/PLAU/PRDX4	19	4
GO:0002283	GO:0002283	neutrophil activation involved in immune response	19/199	488/18493	1.44e-06	1.44e-06	0.000222372	ANXA3/PLAUR/FABP5/ANXA2/ALDOA/TUBB/HSP90AB1/CTSC/CCT2/ANPEP/PSMB1/IMPDH2/PSMA5/MGST1/LGALS3/PSMD7/GLIPR1/PLAU/PRDX4	19	4
GO:0022618	GO:0022618	ribonucleoprotein complex assembly	14/199	275/18493	1.75e-06	1.75e-06	0.00022624	C1QBP/NPM1/HSP90AB1/SNRPB/SNRPD1/STRAP/TAF9/EIF6/RUVBL1/MRPS7/SBDS/EIF3E/WDR18/RRS1	14	4
GO:0051169	GO:0051169	nuclear transport	16/199	360/18493	1.88e-06	1.88e-06	0.00022624	HMGA1/EIF5A/NPM1/HNRNPA1/RAN/HSP90AB1/SRSF7/SNRPB/SNRPD1/TXN/SRSF3/HNRNPA2B1/ANP32B/SSB/EIF6/RRS1	16	4
GO:0042119	GO:0042119	neutrophil activation	19/199	498/18493	1.95e-06	1.95e-06	0.00022624	ANXA3/PLAUR/FABP5/ANXA2/ALDOA/TUBB/HSP90AB1/CTSC/CCT2/ANPEP/PSMB1/IMPDH2/PSMA5/MGST1/LGALS3/PSMD7/GLIPR1/PLAU/PRDX4	19	4
GO:0022613	GO:0022613	ribonucleoprotein complex biogenesis	35/342	485/18493	6.38e-12	6.38e-12	6.91e-09	*NPM1/SNRPB/C1QBP/RAN/HSP90AB1/EBNA1BP2/SNRPD1/FBL/HSP90AA1/GTF3A/PSIP1/NOP56/EIF3E/MRPL22/EIF5/EIF6/RUVBL1/MRPS7/STRAP/DKC1/MRTO4/WDR18/RRP7A/NOP58/NOP16/LSM3/PAK1IP1/TGS1/EMG1/RRP15/TAF9/RRS1/LYAR/EXOSC8/MRPL1	35	6
GO:0006415	GO:0006415	translational termination	16/342	101/18493	5.09e-11	5.09e-11	4.13e-08	EIF5A/MRPL12/MRPL15/MRPL22/MRPS7/MRPS18C/MRPL3/MRPS6/MRPL24/MRPL40/MRPL4/MRPL13/MRPS14/MRPL2/MRPL16/MRPL1	16	6
GO:0006414	GO:0006414	translational elongation	17/342	134/18493	4.63e-10	4.63e-10	2.12e-07	EIF5A/MRPL12/MRPL15/MRPL22/MRPS7/MRPS18C/MRPL3/MRPS6/MRPL24/MRPL40/MRPL4/MRPL13/MRPS14/MRPL2/MRPL16/MRPL1/TSFM	17	6
GO:0042254	GO:0042254	ribosome biogenesis	23/342	282/18493	3.02e-09	3.02e-09	9.81e-07	*NPM1/C1QBP/RAN/EBNA1BP2/FBL/GTF3A/NOP56/MRPL22/EIF6/MRPS7/DKC1/MRTO4/WDR18/RRP7A/NOP58/NOP16/PAK1IP1/EMG1/RRP15/RRS1/LYAR/EXOSC8/MRPL1	23	6
GO:0070646	GO:0070646	protein modification by small protein removal	23/342	292/18493	5.88e-09	5.88e-09	1.59e-06	ACTB/COPS6/RAD23A/PSMB8/PSMB1/PSMA1/PSMA3/PSMB3/PSMA4/RUVBL1/PSMB2/PSMC4/COPS5/PSMD6/COPS3/PSMD8/ADRM1/PSME2/NFKBIA/MYC/PSMB9/USP1/CDC20	23	6
GO:0140053	GO:0140053	mitochondrial gene expression	17/342	159/18493	6.64e-09	6.64e-09	1.66e-06	C1QBP/MRPL12/MRPL15/MRPL22/MRPS7/MRPS18C/MRPL3/MRPS6/MRPL24/MRPL40/MRPL4/MRPL13/MRPS14/MRPL2/MRPL16/MRPL1/TSFM	17	6
GO:0006403	GO:0006403	RNA localization	20/342	231/18493	1.21e-08	1.21e-08	2.8e-06	*HNRNPA1/*NPM1/HNRNPA2B1/EIF5A/RAN/FBL/SRSF3/CCT2/CCT5/SRSF7/CCT8/SSB/EIF6/RUVBL1/DDX39A/DKC1/NOP58/MAGOH/RRS1/NXT1	20	6
GO:0043624	GO:0043624	cellular protein complex disassembly	19/342	210/18493	1.38e-08	1.38e-08	2.8e-06	EIF5A/MRPL12/MRPL15/MRPL22/HSPA8/CAPG/MRPS7/MRPS18C/STMN1/MRPL3/MRPS6/MRPL24/MRPL40/MRPL4/MRPL13/MRPS14/MRPL2/MRPL16/MRPL1	19	6
GO:0032984	GO:0032984	protein-containing complex disassembly	23/342	317/18493	2.75e-08	2.75e-08	4.47e-06	*HMGA1/EIF5A/MRPL12/MRPL15/MRPL22/HSPA8/CAPG/BNIP3/MRPS7/MRPS18C/SUPT16H/STMN1/MRPL3/MRPS6/MRPL24/MRPL40/MRPL4/MRPL13/MRPS14/MRPL2/MYC/MRPL16/MRPL1	23	6
GO:0043312	GO:0043312	neutrophil degranulation	29/342	485/18493	3.14e-08	3.14e-08	4.72e-06	*HMGB1/HSP90AB1/FABP5/B2M/HSP90AA1/CCT2/TUBB/PSMB1/CCT8/HSPA8/PLAUR/ILF2/ANXA2/IMPDH2/ANXA3/TUBB4B/ALDOA/ANPEP/MGST1/PRSS3/PSMD6/CTSC/RHOF/HEXB/GGH/DERA/LGALS3/CD68/FUCA2	29	6
GO:2000573	GO:2000573	positive regulation of DNA biosynthetic process	11/342	66/18493	3.19e-08	3.19e-08	4.72e-06	*HNRNPA1/HNRNPD/HNRNPA2B1/HSP90AB1/HSP90AA1/CCT2/CCT5/CCT8/DKC1/PKIB/MYC	11	6
GO:0002283	GO:0002283	neutrophil activation involved in immune response	29/342	488/18493	3.59e-08	3.59e-08	5.07e-06	*HMGB1/HSP90AB1/FABP5/B2M/HSP90AA1/CCT2/TUBB/PSMB1/CCT8/HSPA8/PLAUR/ILF2/ANXA2/IMPDH2/ANXA3/TUBB4B/ALDOA/ANPEP/MGST1/PRSS3/PSMD6/CTSC/RHOF/HEXB/GGH/DERA/LGALS3/CD68/FUCA2	29	6
GO:0090287	GO:0090287	regulation of cellular response to growth factor stimulus	26/310	282/18493	1.96e-12	1.96e-12	1.92e-09	*IL1B/*FLT1/GREM1/*DAB2/*FSTL3/*CDKN2B/DKK1/FGF1/SULF1/CREB3L1/LTBP1/SMURF2/WNT5A/BAMBI/FOXD1/ENG/ZNF703/UBB/VEGFA/FBN2/CYR61/HHIP/HES1/ILK/BMPER/CTNNB1	26	5
GO:0061448	GO:0061448	connective tissue development	25/310	263/18493	2.69e-12	2.69e-12	1.99e-09	*ACTA2/*TIMP1/*CTGF/*COL1A1/GREM1/*COL6A1/*COL6A3/*SERPINH1/*COL5A1/COL6A2/WNT5B/SULF1/WNT5A/PITX1/PRRX1/FOXD1/ANXA6/TGFBI/UBB/HMGA2/CYR61/SOX9/GDF6/ARID5B/CTNNB1	25	5
GO:0016049	GO:0016049	cell growth	33/310	485/18493	8.94e-12	8.94e-12	5.27e-09	*NPPB/*CTGF/*RGS4/*POSTN/*INHBA/GREM1/*SERPINE2/*IGFBP4/*IGFBP7/*CRYAB/SORBS2/TNFRSF12A/BDNF/WNT5A/ITGA4/MEG3/SPHK1/NRP2/CDKN1A/IGFBP3/SGK1/IGFBP6/HBEGF/VEGFA/CYR61/SOX9/FHL1/TRPV2/ILK/SEMA5A/CTNNB1/BDKRB1/SYT1	33	5
GO:0045765	GO:0045765	regulation of angiogenesis	29/310	381/18493	1.19e-11	1.19e-11	5.84e-09	*SERPINE1/*NPPB/*IL1B/*FLT1/GREM1/*SPARC/*HSPB1/RGCC/MYDGF/FGF1/TNFRSF12A/SULF1/CREB3L1/RRAS/WNT5A/SRPX2/SPHK1/ENG/RHOJ/VEGFA/HMGA2/ANGPTL4/IL6/HTATIP2/BMPER/SEMA5A/HSPB6/CTNNB1/THBS2	29	5
GO:0007178	GO:0007178	transmembrane receptor protein serine/threonine kinase signaling pathway	27/310	340/18493	2.39e-11	2.39e-11	1.01e-08	*COL1A2/*COL3A1/*INHBA/GREM1/*DAB2/*FSTL3/*CDKN2B/DKK1/SULF1/FERMT2/LTBP1/SMURF2/WNT5A/BAMBI/FST/FOXD1/ENG/ZNF703/UBB/FBN2/CYR61/LRRC32/HES1/GDF6/ILK/BMPER/LTBP2	27	5
GO:0090092	GO:0090092	regulation of transmembrane receptor protein serine/threonine kinase signaling pathway	22/310	235/18493	7.74e-11	7.74e-11	2.85e-08	*INHBA/GREM1/*DAB2/*FSTL3/*CDKN2B/DKK1/SULF1/LTBP1/SMURF2/WNT5A/BAMBI/FST/FOXD1/ENG/ZNF703/UBB/FBN2/CYR61/HES1/GDF6/ILK/BMPER	22	5
GO:1901342	GO:1901342	regulation of vasculature development	29/310	421/18493	1.31e-10	1.31e-10	4.3e-08	*SERPINE1/*NPPB/*IL1B/*FLT1/GREM1/*SPARC/*HSPB1/RGCC/MYDGF/FGF1/TNFRSF12A/SULF1/CREB3L1/RRAS/WNT5A/SRPX2/SPHK1/ENG/RHOJ/VEGFA/HMGA2/ANGPTL4/IL6/HTATIP2/BMPER/SEMA5A/HSPB6/CTNNB1/THBS2	29	5
GO:0051216	GO:0051216	cartilage development	20/310	206/18493	3.01e-10	3.01e-10	8.87e-08	*TIMP1/*CTGF/*COL1A1/GREM1/*COL6A1/*COL6A3/*SERPINH1/COL6A2/WNT5B/SULF1/WNT5A/PITX1/PRRX1/ANXA6/TGFBI/HMGA2/CYR61/SOX9/GDF6/CTNNB1	20	5
GO:0045766	GO:0045766	positive regulation of angiogenesis	19/310	200/18493	1.22e-09	1.22e-09	3e-07	*SERPINE1/*IL1B/*FLT1/GREM1/*HSPB1/MYDGF/FGF1/RRAS/WNT5A/SRPX2/SPHK1/ENG/RHOJ/VEGFA/HMGA2/ANGPTL4/BMPER/SEMA5A/HSPB6	19	5
GO:0060485	GO:0060485	mesenchyme development	21/310	269/18493	5.75e-09	5.75e-09	1.06e-06	*ACTA2/*ACTG2/*IL1B/*COL1A1/GREM1/*DAB2/RGCC/WNT5A/BAMBI/S100A4/NRP2/FOXD1/ENG/ANXA6/ZNF703/PITX2/HMGA2/SOX9/HES1/SEMA5A/CTNNB1	21	5
GO:1904018	GO:1904018	positive regulation of vasculature development	19/310	228/18493	1.08e-08	1.08e-08	1.77e-06	*SERPINE1/*IL1B/*FLT1/GREM1/*HSPB1/MYDGF/FGF1/RRAS/WNT5A/SRPX2/SPHK1/ENG/RHOJ/VEGFA/HMGA2/ANGPTL4/BMPER/SEMA5A/HSPB6	19	5
GO:0051216	GO:0051216	cartilage development	23/401	206/18493	1.36e-10	1.36e-10	1.09e-07	*CTGF/*COL6A3/*PRRX1/*GREM1/*COL6A1/*COL6A2/*TIMP1/*CYR61/WNT5A/HMGA2/SERPINH1/ANXA6/SULF1/PITX1/ANXA2/WNT5B/TGFBI/COL1A1/MSX1/STC1/SNAI2/COL12A1/EDN1	23	10
GO:0060485	GO:0060485	mesenchyme development	26/401	269/18493	2.11e-10	2.11e-10	1.34e-07	**S100A4/*IL1B/*GREM1/*HAS2/WNT5A/NRP2/HMGA2/ANXA6/*ACTG2/ACTA2/ENG/FOXD1/SEMA7A/RGCC/COL1A1/MSX1/SEMA5A/GDNF/SOX11/SNAI2/STRAP/DAB2/MYC/ZNF703/PITX2/EDN1	26	10
GO:0048762	GO:0048762	mesenchymal cell differentiation	22/401	210/18493	1.17e-09	1.17e-09	5.34e-07	**S100A4/*IL1B/*GREM1/*HAS2/WNT5A/NRP2/HMGA2/ANXA6/ENG/SEMA7A/RGCC/COL1A1/MSX1/SEMA5A/GDNF/SOX11/SNAI2/STRAP/DAB2/ZNF703/PITX2/EDN1	22	10
GO:0090287	GO:0090287	regulation of cellular response to growth factor stimulus	25/401	282/18493	2.86e-09	2.86e-09	1.14e-06	*IL1B/*GREM1/*DKK1/*CCBE1/*CYR61/WNT5A/*HSPA5/*FGF1/*FLT1/SULF1/VEGFC/SMURF2/ILK/CREB3L1/ENG/VEGFA/FOXD1/*FSTL3/HHIP/MSX1/HSP90AB1/SOX11/STRAP/DAB2/ZNF703	25	10
GO:0031960	GO:0031960	response to corticosteroid	19/401	166/18493	3.7e-09	3.7e-09	1.31e-06	*CTGF/*EIF4EBP1/FIBIN/*MDK/RAN/ANXA1/DDIT4/ENG/UBE2L3/ZFP36L2/COL1A1/FBXO32/FOSL1/ICAM1/HSPD1/STC1/HMGB1/ATP2B1/EDN1	19	10
GO:0045766	GO:0045766	positive regulation of angiogenesis	20/401	200/18493	1.5e-08	1.5e-08	3.67e-06	*SERPINE1/*IL1B/*MYDGF/*GREM1/WNT5A/*FGF1/SPHK1/*FLT1/HMGA2/ANXA1/VEGFC/ENG/VEGFA/PDCL3/ANGPTL4/HSPB6/SEMA5A/HSPB1/FOXC2/HMGB1	20	10
GO:1904018	GO:1904018	positive regulation of vasculature development	21/401	228/18493	2.78e-08	2.78e-08	6.34e-06	*SERPINE1/*IL1B/*MYDGF/*GREM1/WNT5A/*FGF1/SPHK1/*FLT1/HMGA2/ANXA1/VEGFC/ENG/VEGFA/PDCL3/ANGPTL4/HSPB6/SEMA5A/HSPB1/FOXC2/HMGB1/EFNB2	21	10
GO:1901342	GO:1901342	regulation of vasculature development	29/401	421/18493	4.68e-08	4.68e-08	9.34e-06	*SERPINE1/*IL1B/*TNFRSF12A/*MYDGF/*GREM1/WNT5A/*FGF1/SPHK1/*FLT1/HMGA2/KLF2/ANXA1/SULF1/VEGFC/CREB3L1/ENG/ECSCR/VEGFA/PGK1/RGCC/PDCL3/DNMT1/ANGPTL4/HSPB6/SEMA5A/HSPB1/FOXC2/HMGB1/EFNB2	29	10
GO:0006457	GO:0006457	protein folding	20/401	218/18493	6.38e-08	6.38e-08	1.2e-05	B2M/*HSPA5/SPHK1/PPIB/HSP90B1/PFDN2/HSPA8/PDIA3/PDCL3/CCT5/HSPE1/HSPB6/HSP90AB1/DNAJB11/HSPB1/BAG2/HSPD1/GRPEL1/CCT2/CCT8	20	10
GO:0045765	GO:0045765	regulation of angiogenesis	27/401	381/18493	7.75e-08	7.75e-08	1.37e-05	*SERPINE1/*IL1B/*TNFRSF12A/*MYDGF/*GREM1/WNT5A/*FGF1/SPHK1/*FLT1/HMGA2/KLF2/ANXA1/SULF1/VEGFC/CREB3L1/ENG/ECSCR/VEGFA/PGK1/RGCC/PDCL3/ANGPTL4/HSPB6/SEMA5A/HSPB1/FOXC2/HMGB1	27	10
GO:0006457	GO:0006457	protein folding	18/172	218/18493	2.08e-12	2.08e-12	4.95e-09	*HSPB1/*HSPA8/HSP90AA1/EMC2/PPIL1/HSP90AB1/PFDN2/HSPD1/B2M/CCT8/CCT5/NPPB/HSPE1/HSPB6/PPIH/CRYAB/CCT2/PPIB	18	11
GO:0009141	GO:0009141	nucleoside triphosphate metabolic process	19/172	307/18493	7.75e-11	7.75e-11	6.13e-08	GAPDH/*UQCRB/*HSPA8/*CYCS/COX7A1/PGK1/NDUFA12/COX5A/NME1/ALDOA/ENO1/NDUFB3/NDUFAB1/RAN/LDHA/NME4/NDUFB8/NUDT1/UQCRC2	19	11
GO:0006936	GO:0006936	muscle contraction	20/172	351/18493	1.05e-10	1.05e-10	6.21e-08	*MYL6/*VIM/*MYL9/*TPM2/*ACTG2/*GSTO1/*ACTA2/MYL12B/CALD1/CALM2/MYL12A/ALDOA/ENO1/ANXA6/CALM1/SOD1/CNN1/SULF1/HSPB6/CRYAB	20	11
GO:0009199	GO:0009199	ribonucleoside triphosphate metabolic process	18/172	286/18493	1.91e-10	1.91e-10	7.57e-08	GAPDH/*UQCRB/*HSPA8/*CYCS/COX7A1/PGK1/NDUFA12/COX5A/NME1/ALDOA/ENO1/NDUFB3/NDUFAB1/RAN/LDHA/NME4/NDUFB8/UQCRC2	18	11
GO:0010499	GO:0010499	proteasomal ubiquitin-independent protein catabolic process	6/172	23/18493	5.25e-08	5.25e-08	1.39e-05	PSMB3/PSMA1/PSMB1/PSMA4/PSMA3/PSMB2	6	11
GO:0051099	GO:0051099	positive regulation of binding	11/172	181/18493	1.05e-06	1.05e-06	0.000155616	*ANXA2/TXN/S100A10/CALM2/HSP90AB1/NME1/LARP6/EIF3E/RAN/B2M/STMN1	11	11
GO:0006091	GO:0006091	generation of precursor metabolites and energy	17/172	471/18493	1.99e-06	1.99e-06	0.000263193	GAPDH/*UQCRB/*CYCS/COX7A1/PGK1/NDUFA12/COX5A/ALDOA/COX7B/ENO1/NDUFB3/NDUFAB1/LDHA/MDH1/NDUFB8/UQCRC2/MDH2	17	11
GO:0006119	GO:0006119	oxidative phosphorylation	9/172	126/18493	2.74e-06	2.74e-06	0.000342397	*UQCRB/*CYCS/COX7A1/NDUFA12/COX5A/NDUFB3/NDUFAB1/NDUFB8/UQCRC2	9	11
GO:0070646	GO:0070646	protein modification by small protein removal	13/172	292/18493	3.6e-06	3.6e-06	0.000427298	ACTB/*UBB/UCHL1/PSMD8/PSMB3/PSME2/PSMA1/PSMC4/PSMB1/COPS6/PSMA4/PSMA3/PSMB2	13	11
GO:0050821	GO:0050821	protein stabilization	10/172	169/18493	4.17e-06	4.17e-06	0.000463526	GAPDH/HSP90AA1/HSP90AB1/HSPD1/STX12/CCT8/CCT5/CRYAB/CCT2/PPIB	10	11
GO:0140014	GO:0140014	mitotic nuclear division	50/530	277/18493	7.75e-26	7.75e-26	2.65e-22	*UBE2C/*CENPF/*PTTG1/*UBE2S/*CDC20/*SMC4/*PRC1/*MKI67/*CCNB1/*TPX2/*NUSAP1/*RAN/*CCNB2/*AURKA/*MAD2L1/*SPDL1/*ZWINT/*AURKB/CCNA2/TRIP13/BUB3/SMC3/NUF2/SMC2/MYBL2/ANLN/BUB1/PLK1/TUBG1/NEK2/KNSTRN/TACC3/DLGAP5/CENPE/KIF11/RRS1/CDCA8/BUB1B/KIF4A/CHEK1/KIF20B	50	8
GO:0007059	GO:0007059	chromosome segregation	51/530	312/18493	2.9e-24	2.9e-24	4.94e-21	*CENPF/*PTTG1/*BIRC5/*CDC20/*SMC4/*PRC1/*MKI67/*CENPW/*TOP2A/*CCNB1/*NUSAP1/*RAN/*SLC25A5/*MAD2L1/*SPDL1/*ZWINT/*AURKB/*CENPN/TRIP13/BUB3/SMC3/NUF2/SMC2/FEN1/BUB1/PLK1/TUBG1/NEK2/SKA2/KNSTRN/SPC25/TACC3/DLGAP5/CENPE/HJURP/RRS1/CDCA8/BUB1B/KIF4A/SKA1/KIF18	51	8
GO:0000070	GO:0000070	mitotic sister chromatid segregation	37/530	153/18493	4.77e-24	4.77e-24	5.31e-21	*CENPF/*PTTG1/*CDC20/*SMC4/*PRC1/*CCNB1/*NUSAP1/*RAN/*MAD2L1/*SPDL1/*ZWINT/*AURKB/TRIP13/BUB3/NUF2/SMC2/BUB1/PLK1/TUBG1/NEK2/KNSTRN/TACC3/DLGAP5/CENPE/RRS1/CDCA8/BUB1B/KIF4A/KIF18A/KIF23/PSRC1/KIF2C/NCAPG/KIF22/CDC6/CDCA5/FBXO5	37	8
GO:0000819	GO:0000819	sister chromatid segregation	40/530	185/18493	6.22e-24	6.22e-24	5.31e-21	*CENPF/*PTTG1/*CDC20/*SMC4/*PRC1/*TOP2A/*CCNB1/*NUSAP1/*RAN/*MAD2L1/*SPDL1/*ZWINT/*AURKB/TRIP13/BUB3/SMC3/NUF2/SMC2/FEN1/BUB1/PLK1/TUBG1/NEK2/KNSTRN/TACC3/DLGAP5/CENPE/RRS1/CDCA8/BUB1B/KIF4A/KIF18A/KIF23/PSRC1/KIF2C/NCAPG/KIF22/CDC6/CDCA5/FBXO5	40	8
GO:0000280	GO:0000280	nuclear division	54/530	416/18493	8.89e-21	8.89e-21	6.06e-18	*UBE2C/*CENPF/*PTTG1/*UBE2S/*CDC20/*CKS2/*SMC4/*PRC1/*MKI67/*TOP2A/*CCNB1/*TPX2/*NUSAP1/*RAN/*CCNB2/*AURKA/*MAD2L1/*SPDL1/*ZWINT/*AURKB/CCNA2/TRIP13/BUB3/SMC3/NUF2/SMC2/MYBL2/ANLN/BUB1/PLK1/TUBG1/NEK2/ASPM/KNSTRN/TACC3/DLGAP5/CENPE/KIF11/RRS1/CDCA8/BUB1B/	54	8
GO:0033044	GO:0033044	regulation of chromosome organization	47/530	330/18493	7.18e-20	7.18e-20	4.08e-17	*CENPF/*PTTG1/*HMGA1/*CDC20/*HNRNPA1/*MKI67/*PHF19/*HNRNPD/*TOP2A/*DNMT1/*CCNB1/*HNRNPA2B1/*CENPV/*MAD2L1/*SPDL1/*HIST1H1D/*PARP1/*AURKB/*CCT5/CCT2/ATAD2/TRIP13/BUB3/FEN1/BUB1/PLK1/NEK2/CCT8/DKC1/PIF1/TACC3/DLGAP5/GNL3/CENPE/HIST1H1C/HIST1H1E/HIST1H1B/BUB	47	8
GO:0048285	GO:0048285	organelle fission	55/530	458/18493	1.49e-19	1.49e-19	7.28e-17	*UBE2C/*CENPF/*PTTG1/*UBE2S/*CDC20/*CKS2/*SMC4/*PRC1/*MKI67/*TOP2A/*CCNB1/*TPX2/*NUSAP1/*RAN/*CCNB2/*AURKA/*MAD2L1/*SPDL1/*ZWINT/*AURKB/CCNA2/TRIP13/BUB3/SMC3/NUF2/SMC2/MYBL2/ANLN/BUB1/PLK1/TUBG1/NEK2/ASPM/KNSTRN/TACC3/DLGAP5/CENPE/KIF11/BNIP3/RRS1/CDCA8/	55	8
GO:0006260	GO:0006260	DNA replication	42/530	268/18493	1.91e-19	1.91e-19	8.16e-17	*HMGA1/CDK1/*DUT/*CLSPN/*SSRP1/*NASP/*RNASEH2A/*STOML2/*GINS2/RPA3/CCNA2/RRM2/GMNN/SMC3/SUPT16H/FEN1/E2F7/SSBP1/PIF1/WDR18/ORC6/MCM7/PCNA/JUN/RFC2/CHEK1/RFC3/DNAJC2/ID3/DBF4/RBBP8/RRM1/BRCA2/MCM10/MCM3/ATAD5/CDC6/PRIM1/CDC45/MSH6/FBXO5/RFC5	42	8
GO:0071103	GO:0071103	DNA conformation change	43/530	283/18493	2.35e-19	2.35e-19	8.92e-17	*HMGB2/*HIST1H4C/*HMGB1/*HMGA1/*ANP32B/*SMC4/*CENPW/*NPM1/*TOP2A/*CCNB1/*HNRNPA2B1/*NUSAP1/CDK1/*CENPM/*CENPA/*CENPV/*NASP/*HIST1H1D/*CENPN/*GINS2/CENPH/HMGB3/CENPK/SMC2/RUVBL1/HELLS/PIF1/MCM7/CENPU/HIST1H1C/HMGA2/HJURP/HIST1H1E/HIST1H1B/ANXA1/ASF1B/ITGB3	43	8
GO:0098813	GO:0098813	nuclear chromosome segregation	41/530	258/18493	3.1e-19	3.1e-19	1.06e-16	*CENPF/*PTTG1/*CDC20/*SMC4/*PRC1/*TOP2A/*CCNB1/*NUSAP1/*RAN/*MAD2L1/*SPDL1/*ZWINT/*AURKB/TRIP13/BUB3/SMC3/NUF2/SMC2/FEN1/BUB1/PLK1/TUBG1/NEK2/KNSTRN/TACC3/DLGAP5/CENPE/RRS1/CDCA8/BUB1B/KIF4A/KIF18A/KIF23/FAM83D/PSRC1/KIF2C/NCAPG/KIF22/CDC6/CDCA5/FBXO5	41	8
GO:0006323	GO:0006323	DNA packaging	36/530	209/18493	3.35e-18	3.35e-18	1.04e-15	*HMGB2/*HIST1H4C/*HMGB1/*HMGA1/*ANP32B/*SMC4/*CENPW/*NPM1/*TOP2A/*CCNB1/*NUSAP1/CDK1/*CENPM/*CENPA/*CENPV/*NASP/*HIST1H1D/*CENPN/CENPH/CENPK/SMC2/RUVBL1/HELLS/CENPU/HIST1H1C/HMGA2/HJURP/HIST1H1E/HIST1H1B/ASF1B/ITGB3BP/HIST1H1A/ASF1A/HIST1H2BH/NCAPG/CDCA5	36	8
GO:0051052	GO:0051052	regulation of DNA metabolic process	50/530	412/18493	4.75e-18	4.75e-18	1.35e-15	*HMGB1/*DEK/*HNRNPA1/*HNRNPD/*NPM1/*DNMT1/*HNRNPA2B1/CDK1/*HSP90AA1/*HIST1H1D/*PARP1/*STOML2/*AURKB/*CCT5/KPNA2/CCNA2/USP1/CCT2/HSP90AB1/ANXA3/GMNN/SMC3/E2F7/NEK2/CCT8/DKC1/PIF1/WDR18/GNL3/PCNA/HIST1H1C/HMGA2/EXOSC3/JUN/HIST1H1E/HIST1H1B/FOXM1/RFC2/CHEK1/	50	8

## Sheet: Supplemental_Table_S3
	p_val	avg_logFC	pct.1	pct.2	p_val_adj	cluster	gene
MMP7	0	1.41498	0.89	0.891	0	1	MMP7
SAA1	0	1.14055	0.848	0.892	0	1	SAA1
PDZK1IP1	0	0.775681	0.867	0.895	0	1	PDZK1IP1
SAT1	0	0.74103	0.996	0.992	0	1	SAT1
TNFSF10	0	0.720933	0.899	0.904	0	1	TNFSF10
CXCL6	0	0.648206	0.94	0.959	0	1	CXCL6
FBN1	0	0.59495	0.988	0.987	0	1	FBN1
CDH6	0	0.590742	0.787	0.822	0	1	CDH6
NEAT1	0	0.516435	1	0.999	0	1	NEAT1
ADAMTS5	0	0.50337	0.825	0.883	0	1	ADAMTS5
SOX4	0	0.486332	0.999	0.994	0	1	SOX4
CCND2	0	0.485311	0.81	0.853	0	1	CCND2
BTG1	0	0.454552	0.856	0.919	0	1	BTG1
STAT1	0	0.439966	0.847	0.855	0	1	STAT1
SPINT2	0	0.432989	0.984	0.982	0	1	SPINT2
JADE1	0	0.410047	0.719	0.769	0	1	JADE1
FILIP1L	0	0.400619	0.888	0.891	0	1	FILIP1L
MEG3	0	0.368177	0.94	0.969	0	1	MEG3
MT-ND2	0	0.365197	1	1	0	1	MT-ND2
DLG1	0	0.358883	0.884	0.937	0	1	DLG1
CDKN1A	0	0.28427	0.947	0.961	0	1	CDKN1A
ARL4C	0	0.27656	0.935	0.96	0	1	ARL4C
COL1A1	0	0.271058	0.941	0.959	0	1	COL1A1
SPARC	0	0.239451	0.998	0.999	0	1	SPARC
CTC-425F1.4	0	0.128906	0.435	0.781	0	1	CTC-425F1.4
TNF	0	0.0737088	0.391	0.774	0	1	TNF
MACC1	0	0.0702964	0.43	0.788	0	1	MACC1
LSAMP	3.42e-260	0.0700082	0.561	0.866	6.84e-257	1	LSAMP
SAA2	3.55e-249	0.649283	0.652	0.777	7.1e-246	1	SAA2
MAGEH1	1.11e-242	0.0579164	0.489	0.76	2.23e-239	1	MAGEH1
NKAIN4	7.07e-224	0.406044	0.752	0.853	1.41e-220	1	NKAIN4
SNN	1.86e-217	0.0533169	0.461	0.76	3.72e-214	1	SNN
SSC4D	3.38e-211	0.142727	0.385	0.706	6.76e-208	1	SSC4D
SOD2	5e-209	0.383447	0.843	0.915	1e-205	1	SOD2
SPP1	1.34e-207	0.312358	0.886	0.934	2.68e-204	1	SPP1
ATP1B1	3.36e-205	0.364805	0.711	0.804	6.73e-202	1	ATP1B1
HIVEP2	1.13e-193	0.0543205	0.358	0.656	2.26e-190	1	HIVEP2
NSG1	1.19e-189	0.0606787	0.515	0.781	2.39e-186	1	NSG1
GPR68	6.83e-186	0.0919855	0.398	0.713	1.37e-182	1	GPR68
QPRT	4.28e-185	0.350609	0.483	0.483	8.57e-182	1	QPRT
LRRC17	8.8e-175	0.265458	0.854	0.94	1.76e-171	1	LRRC17
SYNGR1	2.62e-174	0.0652553	0.497	0.785	5.25e-171	1	SYNGR1
BIK	2.33e-170	0.0697505	0.437	0.723	4.67e-167	1	BIK
ANOS1	8.35e-169	0.0682386	0.423	0.738	1.67e-165	1	ANOS1
LRRC75A	1.64e-168	0.131107	0.607	0.874	3.29e-165	1	LRRC75A
FEZ1	1.61e-165	0.251644	0.873	0.945	3.22e-162	1	FEZ1
GPRC5C	1.4e-162	0.346074	0.757	0.87	2.8e-159	1	GPRC5C
COL12A1	1.07e-159	0.0533218	0.357	0.66	2.15e-156	1	COL12A1
CYTL1	1.68e-158	0.0514363	0.502	0.765	3.35e-155	1	CYTL1
LINC00960	8.58e-158	0.0534194	0.541	0.777	1.72e-154	1	LINC00960
NREP	2.13e-155	0.306343	0.835	0.938	4.25e-152	1	NREP
EDN2	5.07e-153	0.0897772	0.438	0.73	1.01e-149	1	EDN2
SOCS1	7.71e-152	0.0681725	0.452	0.761	1.54e-148	1	SOCS1
EEF1A2	1.64e-151	0.12921	0.533	0.821	3.28e-148	1	EEF1A2
ANKRD45	1.53e-148	0.054506	0.367	0.654	3.05e-145	1	ANKRD45
SPON2	8.55e-148	0.483274	0.614	0.73	1.71e-144	1	SPON2
TNC	1.06e-141	0.320897	0.696	0.84	2.11e-138	1	TNC
GDF5	2.38e-141	0.107962	0.558	0.856	4.76e-138	1	GDF5
MAL2	2.02e-138	0.350828	0.737	0.827	4.03e-135	1	MAL2
PRSS23	1.94e-136	0.208639	0.906	0.959	3.89e-133	1	PRSS23
CXCL1	3.85e-132	0.27811	0.953	0.983	7.7e-129	1	CXCL1
C15orf48	6.22e-126	0.370957	0.798	0.914	1.24e-122	1	C15orf48
NCKAP5	1.61e-121	0.0633192	0.396	0.687	3.21e-118	1	NCKAP5
TNFAIP2	3.29e-121	0.342729	0.694	0.811	6.58e-118	1	TNFAIP2
TCEAL7	3.27e-120	0.0792759	0.433	0.727	6.54e-117	1	TCEAL7
LTB	5.88e-118	0.437477	0.697	0.777	1.18e-114	1	LTB
CPE	5.03e-116	0.127411	0.378	0.673	1.01e-112	1	CPE
ST3GAL5	2.04e-115	0.0866466	0.46	0.746	4.08e-112	1	ST3GAL5
SYCE1L	1.21e-114	0.0642575	0.443	0.73	2.43e-111	1	SYCE1L
ACSM3	2.59e-111	0.3065	0.579	0.757	5.17e-108	1	ACSM3
CYP1B1	1.66e-109	0.3726	0.466	0.527	3.32e-106	1	CYP1B1
ABCA7	3.76e-107	0.0509666	0.215	0.494	7.52e-104	1	ABCA7
SORBS2	1.53e-106	0.126323	0.546	0.834	3.05e-103	1	SORBS2
TGFB2	2.73e-106	0.285437	0.684	0.794	5.47e-103	1	TGFB2
TM7SF2	5.99e-106	0.0818532	0.496	0.752	1.2e-102	1	TM7SF2
SLITRK4	1.48e-105	0.174226	0.275	0.349	2.97e-102	1	SLITRK4
PLPP2	1.27e-104	0.0544252	0.676	0.907	2.53e-101	1	PLPP2
SYT11	5.78e-104	0.0978389	0.43	0.708	1.16e-100	1	SYT11
GDNF	5.58e-103	0.0560985	0.457	0.732	1.12e-99	1	GDNF
PADI2	7.67e-101	0.0570459	0.58	0.855	1.53e-97	1	PADI2
CXCL2	3.95e-100	0.0636213	0.319	0.576	7.91e-97	1	CXCL2
HOXD11	1.41e-99	0.0576662	0.419	0.678	2.81e-96	1	HOXD11
CLEC4E	1.5e-99	0.346006	0.494	0.576	3e-96	1	CLEC4E
RP11-519G16.5	9.43e-98	0.147858	0.355	0.436	1.89e-94	1	RP11-519G16.5
ICAM1	9.94e-98	0.0784882	0.48	0.749	1.99e-94	1	ICAM1
FAM84B	3.64e-97	0.330684	0.567	0.695	7.28e-94	1	FAM84B
ASB2	1.46e-96	0.0634429	0.322	0.582	2.91e-93	1	ASB2
CFTR	1.63e-96	0.100822	0.405	0.691	3.26e-93	1	CFTR
C1orf56	7.69e-95	0.0802483	0.329	0.595	1.54e-91	1	C1orf56
GABPB1-AS1	1.29e-94	0.0524682	0.419	0.676	2.58e-91	1	GABPB1-AS1
IGFBP2	2.59e-93	0.413062	0.614	0.732	5.18e-90	1	IGFBP2
MCAM	3.15e-91	0.230274	0.732	0.865	6.3e-88	1	MCAM
SLC12A5	8.1e-90	0.0768028	0.379	0.635	1.62e-86	1	SLC12A5
SHH	2.5e-88	0.0982589	0.477	0.786	5.01e-85	1	SHH
RHOB	3.07e-88	0.269351	0.575	0.694	6.14e-85	1	RHOB
TACSTD2	2.98e-87	0.114639	0.463	0.728	5.95e-84	1	TACSTD2
EPS8L1	6.47e-85	0.111984	0.543	0.825	1.29e-81	1	EPS8L1
ABCA3	3.34e-84	0.0571113	0.339	0.591	6.69e-81	1	ABCA3
PAPPA	1.33e-82	0.169047	0.849	0.937	2.65e-79	1	PAPPA
KLHL5	5.19e-82	0.103032	0.446	0.725	1.04e-78	1	KLHL5
RAB11FIP1	4.22e-81	0.259372	0.613	0.74	8.43e-78	1	RAB11FIP1
HOXB5	9.93e-79	0.107827	0.528	0.774	1.99e-75	1	HOXB5
AKR1B1	2.5e-78	0.215583	0.871	0.958	5e-75	1	AKR1B1
TNFRSF11B	4.38e-77	0.255952	0.422	0.506	8.76e-74	1	TNFRSF11B
SYNPO	1.23e-76	0.0595126	0.398	0.651	2.47e-73	1	SYNPO
SHISA2	3.41e-75	0.311444	0.642	0.764	6.82e-72	1	SHISA2
RASGRF2	8.43e-75	0.131203	0.418	0.684	1.69e-71	1	RASGRF2
NNAT	5.95e-74	0.102132	0.523	0.819	1.19e-70	1	NNAT
EHF	1.37e-73	0.140682	0.513	0.794	2.74e-70	1	EHF
COL4A4	2.79e-73	0.0573882	0.271	0.536	5.58e-70	1	COL4A4
KCNJ16	6.08e-72	0.31533	0.515	0.638	1.22e-68	1	KCNJ16
CFH	1.74e-71	0.0541226	0.307	0.574	3.48e-68	1	CFH
RP11-11N9.4	1.87e-71	0.0843797	0.47	0.714	3.74e-68	1	RP11-11N9.4
BBC3	9.42e-71	0.131518	0.474	0.732	1.88e-67	1	BBC3
CASC15	3.01e-70	0.101309	0.357	0.624	6.03e-67	1	CASC15
TNIK	1.55e-69	0.0529375	0.273	0.536	3.1e-66	1	TNIK
IQCD	4.95e-68	0.21547	0.479	0.753	9.9e-65	1	IQCD
CDC42SE1	1.49e-66	0.0505974	0.508	0.76	2.98e-63	1	CDC42SE1
MECOM	1.87e-66	0.095171	0.531	0.777	3.75e-63	1	MECOM
MT1F	4.36e-66	0.265377	0.54	0.635	8.71e-63	1	MT1F
LBH	1.43e-65	0.104486	0.417	0.694	2.86e-62	1	LBH
GSTP1	5.93e-63	0.0979746	1	1	1.19e-59	1	GSTP1
MXRA8	2.81e-61	0.0911257	0.574	0.815	5.62e-58	1	MXRA8
MFHAS1	3.45e-61	0.30821	0.721	0.863	6.9e-58	1	MFHAS1
FAM227A	3.81e-61	0.0621998	0.259	0.507	7.62e-58	1	FAM227A
GS1-600G8.5	1.03e-59	0.226992	0.545	0.773	2.06e-56	1	GS1-600G8.5
SHISA9	9.67e-59	0.110445	0.34	0.598	1.93e-55	1	SHISA9
NTN4	5.88e-57	0.271038	0.64	0.767	1.18e-53	1	NTN4
SPRY1	9.34e-57	0.0725594	0.282	0.525	1.87e-53	1	SPRY1
CXCL16	2.03e-56	0.153276	0.358	0.449	4.07e-53	1	CXCL16
RP11-95M15.1	2.07e-56	0.0803566	0.458	0.732	4.14e-53	1	RP11-95M15.1
TMPRSS2	2.39e-55	0.0700388	0.477	0.783	4.78e-52	1	TMPRSS2
LUM	1.64e-54	0.0994737	0.236	0.487	3.28e-51	1	LUM
FAT3	2.38e-52	0.0610506	0.251	0.357	4.76e-49	1	FAT3
NCAM1	7.15e-51	0.0649944	0.342	0.458	1.43e-47	1	NCAM1
CLDN2	1.56e-50	0.123044	0.512	0.755	3.13e-47	1	CLDN2
SLC16A12	2.92e-50	0.0678	0.228	0.331	5.84e-47	1	SLC16A12
SNHG23	1.55e-49	0.0822819	0.385	0.64	3.11e-46	1	SNHG23
STK38L	3.45e-49	0.0645064	0.459	0.7	6.9e-46	1	STK38L
TBC1D19	3.91e-49	0.114621	0.494	0.73	7.82e-46	1	TBC1D19
SLC26A2	6.42e-49	0.193078	0.434	0.552	1.28e-45	1	SLC26A2
FLNC	2.71e-48	0.0667887	0.587	0.82	5.43e-45	1	FLNC
ITGA11	1.48e-47	0.132592	0.274	0.378	2.95e-44	1	ITGA11
FGD4	3.15e-47	0.09607	0.34	0.577	6.31e-44	1	FGD4
PFKFB3	5.18e-46	0.119435	0.311	0.412	1.04e-42	1	PFKFB3
GCHFR	7.84e-46	0.240204	0.741	0.901	1.57e-42	1	GCHFR
IGFBP7	2.9e-45	0.0695248	0.999	1	5.8e-42	1	IGFBP7
COL5A1	4.74e-44	0.132196	0.722	0.915	9.48e-41	1	COL5A1
PGM5P2	1.94e-43	0.0559693	0.297	0.533	3.87e-40	1	PGM5P2
NPFFR2	5.07e-43	0.0794557	0.272	0.51	1.01e-39	1	NPFFR2
TFAP2B	2.29e-42	0.0724064	0.344	0.594	4.57e-39	1	TFAP2B
IGFBP3	1.37e-41	0.248167	0.552	0.662	2.74e-38	1	IGFBP3
TRIM16L	2.33e-41	0.229126	0.551	0.669	4.65e-38	1	TRIM16L
KCNJ15	4.12e-40	0.223182	0.469	0.596	8.23e-37	1	KCNJ15
SLC22A3	6.43e-40	0.113955	0.441	0.676	1.29e-36	1	SLC22A3
INHBA	1.7e-39	0.0812435	0.909	0.967	3.39e-36	1	INHBA
MFAP2	1.82e-39	0.0504932	0.737	0.934	3.64e-36	1	MFAP2
MCC	5.93e-39	0.0795981	0.375	0.61	1.19e-35	1	MCC
DENND2A	9.47e-39	0.0684905	0.352	0.587	1.89e-35	1	DENND2A
FOXC1	6.28e-38	0.0978883	0.328	0.565	1.26e-34	1	FOXC1
FLJ16779	1.25e-37	0.264221	0.601	0.815	2.49e-34	1	FLJ16779
TXNIP	1.7e-37	0.0703734	0.228	0.348	3.4e-34	1	TXNIP
PLLP	1.99e-37	0.0706541	0.374	0.597	3.99e-34	1	PLLP
NUAK2	2.75e-37	0.110754	0.414	0.65	5.5e-34	1	NUAK2
MAF	3.16e-37	0.0558647	0.3	0.542	6.33e-34	1	MAF
DDR1	2.42e-36	0.276836	0.602	0.739	4.83e-33	1	DDR1
B3GALT5	4.25e-36	0.0649765	0.305	0.433	8.51e-33	1	B3GALT5
HLA-DMB	5.98e-36	0.0776967	0.452	0.589	1.2e-32	1	HLA-DMB
MAP3K7CL	6.42e-36	0.0608238	0.526	0.768	1.28e-32	1	MAP3K7CL
TGFBI	4.03e-34	0.0957774	0.949	0.989	8.05e-31	1	TGFBI
TFF3	7.58e-34	0.0612562	0.184	0.296	1.52e-30	1	TFF3
SMIM1	1.49e-33	0.0513789	0.319	0.432	2.98e-30	1	SMIM1
ADAMTS9	2.02e-33	0.0584679	0.38	0.608	4.04e-30	1	ADAMTS9
PLAU	2.99e-33	0.128432	0.908	0.974	5.99e-30	1	PLAU
EPDR1	9.18e-33	0.0759584	0.236	0.367	1.84e-29	1	EPDR1
CD82	1.24e-32	0.130843	0.482	0.726	2.48e-29	1	CD82
DPYSL3	1.73e-32	0.184795	0.778	0.913	3.45e-29	1	DPYSL3
QPCT	4.68e-32	0.056444	0.397	0.61	9.35e-29	1	QPCT
BIRC3	2.36e-31	0.0795024	0.411	0.623	4.73e-28	1	BIRC3
INA	3.75e-31	0.0516383	0.258	0.49	7.5e-28	1	INA
PLCXD2	9.51e-31	0.186589	0.737	0.868	1.9e-27	1	PLCXD2
GPX3	5.9e-30	0.0505874	0.364	0.475	1.18e-26	1	GPX3
IL32	7.64e-30	0.0727028	0.997	0.999	1.53e-26	1	IL32
CASP3	1.26e-29	0.0771298	0.504	0.745	2.51e-26	1	CASP3
RTKN2	1.27e-29	0.0604471	0.373	0.607	2.54e-26	1	RTKN2
MTRNR2L8	6.73e-29	0.160097	0.553	0.784	1.35e-25	1	MTRNR2L8
GPRC5A	1.09e-28	0.163297	0.65	0.776	2.19e-25	1	GPRC5A
CXCL3	1.45e-28	0.0746686	0.504	0.716	2.9e-25	1	CXCL3
RND1	2.88e-28	0.0875257	0.453	0.705	5.76e-25	1	RND1
WNT7A	4.13e-28	0.078276	0.391	0.618	8.27e-25	1	WNT7A
FLRT2	4.51e-28	0.0666046	0.26	0.38	9.02e-25	1	FLRT2
NCOA7	4.55e-28	0.0821029	0.465	0.675	9.09e-25	1	NCOA7
MATN2	8.04e-28	0.273621	0.509	0.687	1.61e-24	1	MATN2
ALPK3	1.31e-27	0.14977	0.496	0.733	2.62e-24	1	ALPK3
GOLGB1	4.16e-27	0.183354	0.51	0.665	8.32e-24	1	GOLGB1
AIF1L	4.17e-27	0.185183	0.411	0.539	8.34e-24	1	AIF1L
LRRC8A	5.26e-27	0.0785388	0.627	0.849	1.05e-23	1	LRRC8A
COBLL1	5.9e-27	0.102818	0.334	0.446	1.18e-23	1	COBLL1
ABCB1	2.02e-25	0.150912	0.486	0.731	4.05e-22	1	ABCB1
GDF15	3.68e-25	0.157151	0.801	0.927	7.36e-22	1	GDF15
DCN	8.91e-25	0.19259	0.434	0.66	1.78e-21	1	DCN
FBXO2	1.07e-24	0.21252	0.595	0.843	2.15e-21	1	FBXO2
IGSF3	2.03e-24	0.101762	0.257	0.472	4.07e-21	1	IGSF3
CCPG1	5.38e-24	0.107853	0.569	0.805	1.08e-20	1	CCPG1
SDC1	7.65e-24	0.125895	0.537	0.774	1.53e-20	1	SDC1
OCIAD2	8.39e-24	0.0532938	0.994	0.997	1.68e-20	1	OCIAD2
TGFBR1	1.94e-23	0.073922	0.376	0.591	3.88e-20	1	TGFBR1
HMCN1	2.2e-22	0.0725827	0.369	0.6	4.39e-19	1	HMCN1
IRS2	5.08e-22	0.0507672	0.299	0.53	1.02e-18	1	IRS2
L1CAM	5.42e-22	0.207312	0.527	0.675	1.08e-18	1	L1CAM
LAMC2	2.01e-21	0.147149	0.805	0.916	4.01e-18	1	LAMC2
MDM2	4.95e-21	0.218087	0.56	0.715	9.89e-18	1	MDM2
SFRP1	9.48e-21	0.0819802	0.478	0.69	1.9e-17	1	SFRP1
DHCR24	1.5e-20	0.176188	0.537	0.698	2.99e-17	1	DHCR24
CYP27A1	1.77e-20	0.0575913	0.39	0.519	3.55e-17	1	CYP27A1
PROM1	5.97e-20	0.100984	0.332	0.467	1.19e-16	1	PROM1
HIST1H2AC	8.31e-20	0.0738823	0.35	0.569	1.66e-16	1	HIST1H2AC
NABP1	1.02e-19	0.0519849	0.537	0.768	2.04e-16	1	NABP1
POU3F3	1.08e-19	0.132522	0.477	0.691	2.16e-16	1	POU3F3
KLHL24	1.61e-19	0.245555	0.465	0.721	3.21e-16	1	KLHL24
PCDH7	3.35e-19	0.0724149	0.39	0.584	6.69e-16	1	PCDH7
RP11-277P12.20	4.57e-19	0.279095	0.657	0.842	9.14e-16	1	RP11-277P12.20
POU2F2	1.45e-18	0.0910026	0.68	0.883	2.91e-15	1	POU2F2
RP11-532F12.5	2.9e-18	0.0958752	0.385	0.586	5.79e-15	1	RP11-532F12.5
RDH10	1.45e-17	0.0804373	0.286	0.42	2.9e-14	1	RDH10
NCF2	1.87e-17	0.0715922	0.523	0.712	3.73e-14	1	NCF2
IRX2	4.17e-17	0.112437	0.523	0.756	8.34e-14	1	IRX2
SPNS2	1.77e-16	0.263747	0.562	0.733	3.53e-13	1	SPNS2
TMEM178A	2.68e-16	0.0932857	0.434	0.672	5.36e-13	1	TMEM178A
TNFRSF10D	4.71e-16	0.1241	0.604	0.824	9.42e-13	1	TNFRSF10D
MAP1LC3A	6.9e-16	0.207553	0.7	0.843	1.38e-12	1	MAP1LC3A
ZNF503	8.4e-16	0.205142	0.551	0.697	1.68e-12	1	ZNF503
TP53BP2	1.16e-15	0.0957125	0.385	0.608	2.32e-12	1	TP53BP2
PCSK1N	1.41e-15	0.128879	0.626	0.851	2.82e-12	1	PCSK1N
ACTBL2	2.24e-15	0.0623421	0.353	0.57	4.47e-12	1	ACTBL2
PDGFB	4.2e-15	0.112577	0.398	0.63	8.4e-12	1	PDGFB
SLC43A3	8.27e-15	0.0886278	0.429	0.62	1.65e-11	1	SLC43A3
NEURL3	1.42e-14	0.0774393	0.442	0.693	2.84e-11	1	NEURL3
GPR87	1.78e-14	0.0625637	0.397	0.59	3.57e-11	1	GPR87
BEX2	3.37e-14	0.238416	0.611	0.8	6.75e-11	1	BEX2
LINC00704	3.87e-14	0.12158	0.528	0.738	7.73e-11	1	LINC00704
C1orf106	3.89e-14	0.0970134	0.419	0.617	7.79e-11	1	C1orf106
SPINT1	5.52e-14	0.184845	0.517	0.765	1.1e-10	1	SPINT1
GCNT2	1.15e-13	0.0976213	0.278	0.424	2.29e-10	1	GCNT2
ZNF677	2.31e-13	0.0532687	0.275	0.484	4.62e-10	1	ZNF677
SLC5A3	2.91e-13	0.130277	0.385	0.607	5.82e-10	1	SLC5A3
PPM1H	3.31e-13	0.289107	0.522	0.705	6.61e-10	1	PPM1H
BMF	4.11e-13	0.119184	0.37	0.517	8.23e-10	1	BMF
ZBED2	6.33e-13	0.0842331	0.321	0.457	1.27e-09	1	ZBED2
EPHX1	1.31e-12	0.095826	0.359	0.487	2.61e-09	1	EPHX1
BPGM	2.02e-12	0.143777	0.593	0.809	4.04e-09	1	BPGM
HTRA1	2.52e-12	0.0925689	0.474	0.666	5.05e-09	1	HTRA1
CTD-3138B18.5	3.48e-12	0.107611	0.639	0.836	6.97e-09	1	CTD-3138B18.5
HOXA3	5.28e-12	0.120566	0.488	0.689	1.06e-08	1	HOXA3
CDH13	1.88e-11	0.0880659	0.65	0.859	3.76e-08	1	CDH13
MRPS6	1.95e-11	0.0527784	0.727	0.91	3.91e-08	1	MRPS6
PRICKLE2	2.91e-11	0.0716259	0.217	0.425	5.83e-08	1	PRICKLE2
ADGRF1	4.4e-11	0.0822383	0.341	0.491	8.81e-08	1	ADGRF1
MFI2	5.32e-11	0.0650251	0.393	0.526	1.06e-07	1	MFI2
AK5	1.05e-10	0.0578581	0.474	0.645	2.11e-07	1	AK5
HS3ST1	1.21e-10	0.0550728	0.297	0.503	2.41e-07	1	HS3ST1
DHRS3	1.23e-10	0.162166	0.597	0.833	2.46e-07	1	DHRS3
NEDD9	4.01e-10	0.0595834	0.283	0.492	8.01e-07	1	NEDD9
SIPA1L2	7.38e-10	0.123138	0.255	0.453	1.48e-06	1	SIPA1L2
FIBCD1	1.01e-09	0.119802	0.413	0.641	2.01e-06	1	FIBCD1
PLCG2	1.75e-09	0.0518158	0.301	0.502	3.49e-06	1	PLCG2
EFNA1	1.85e-09	0.134574	0.495	0.694	3.7e-06	1	EFNA1
INPP4B	5.49e-09	0.0511636	0.206	0.372	1.1e-05	1	INPP4B
C1orf186	5.8e-09	0.0790323	0.379	0.573	1.16e-05	1	C1orf186
CLDN6	8.1e-09	0.260811	0.454	0.608	1.62e-05	1	CLDN6
CX3CL1	8.24e-09	0.136758	0.421	0.635	1.65e-05	1	CX3CL1
ELF3	9.01e-09	0.0709166	0.282	0.483	1.8e-05	1	ELF3
ALDH1A3	1.2e-08	0.130498	0.54	0.757	2.4e-05	1	ALDH1A3
PTPRS	2.01e-08	0.159151	0.496	0.724	4.02e-05	1	PTPRS
PLAT	2.84e-08	0.104264	0.881	0.974	5.67e-05	1	PLAT
PNMA2	3.48e-08	0.0506122	0.236	0.392	6.95e-05	1	PNMA2
MMP15	8.57e-08	0.134195	0.414	0.639	0.000171364	1	MMP15
CCDC112	8.88e-08	0.0606346	0.447	0.627	0.000177652	1	CCDC112
MAMDC2	9.17e-08	0.059658	0.284	0.484	0.000183317	1	MAMDC2
LINC00973	1.09e-07	0.124398	0.549	0.709	0.000218753	1	LINC00973
LIMCH1	1.26e-07	0.229807	0.531	0.752	0.000252635	1	LIMCH1
GCNT3	1.9e-07	0.130513	0.5	0.735	0.000380264	1	GCNT3
AK4	3.37e-07	0.0962832	0.361	0.508	0.00067409	1	AK4
OTUB2	5.41e-07	0.0726381	0.302	0.454	0.00108274	1	OTUB2
HCFC1R1	5.42e-07	0.100376	0.674	0.843	0.00108462	1	HCFC1R1
KCNQ1OT1	9.89e-07	0.173092	0.402	0.624	0.00197725	1	KCNQ1OT1
TGFA	1.25e-06	0.086613	0.24	0.401	0.00249672	1	TGFA
DCLK2	2.51e-06	0.162217	0.416	0.619	0.00501622	1	DCLK2
WEE1	3.31e-06	0.174557	0.418	0.577	0.00662119	1	WEE1
LHX1	3.94e-06	0.176172	0.693	0.856	0.00788213	1	LHX1
HOXB-AS3	6.37e-06	0.0588223	0.398	0.579	0.0127483	1	HOXB-AS3
TMEM139	6.56e-06	0.126872	0.35	0.505	0.0131223	1	TMEM139
FIGN	7.44e-06	0.10101	0.234	0.391	0.0148884	1	FIGN
EMX2	1.25e-05	0.107719	0.39	0.581	0.0250846	1	EMX2
DSC2	1.81e-05	0.109292	0.241	0.453	0.036199	1	DSC2
ALPK2	2.01e-05	0.208611	0.477	0.689	0.0401983	1	ALPK2
IGDCC4	3.06e-05	0.165766	0.502	0.747	0.0611057	1	IGDCC4
CDKN1C	3.21e-05	0.202268	0.703	0.894	0.0641083	1	CDKN1C
ABCA1	3.66e-05	0.208619	0.617	0.831	0.0732171	1	ABCA1
STMN1	4.02e-05	0.0539269	0.898	0.972	0.0803051	1	STMN1
SHROOM3	6.58e-05	0.203421	0.42	0.577	0.131628	1	SHROOM3
PAG1	6.96e-05	0.0636634	0.202	0.398	0.139224	1	PAG1
CTNNB1	9.3e-05	0.108036	0.59	0.807	0.186088	1	CTNNB1
C4orf26	0.000142015	0.100774	0.265	0.452	0.28403	1	C4orf26
NFIB	0.000144082	0.0564347	0.407	0.586	0.288163	1	NFIB
SULT1C4	0.000255459	0.173478	0.411	0.572	0.510918	1	SULT1C4
JAG1	0.000506963	0.144492	0.55	0.743	1	1	JAG1
LINC01320	0.000540797	0.0541002	0.338	0.477	1	1	LINC01320
RNASET2	0.000712277	0.0701752	0.649	0.842	1	1	RNASET2
A1BG	0.00128035	0.0637857	0.782	0.935	1	1	A1BG
FAM134B	0.00134871	0.225707	0.454	0.637	1	1	FAM134B
MORC4	0.00203853	0.1426	0.659	0.838	1	1	MORC4
CLU	0.00240217	0.192705	0.48	0.678	1	1	CLU
IRF1	0.00277733	0.0622431	0.283	0.48	1	1	IRF1
DUSP10	0.00292355	0.149737	0.384	0.547	1	1	DUSP10
FXYD2	0.00367932	0.171762	0.346	0.507	1	1	FXYD2
RIN2	0.00420781	0.133606	0.514	0.678	1	1	RIN2
FOXA1	0.00472462	0.0800906	0.305	0.491	1	1	FOXA1
CREB5	0.00550993	0.0853888	0.329	0.533	1	1	CREB5
NCEH1	0.00578046	0.135735	0.518	0.737	1	1	NCEH1
LFNG	0.00795162	0.163734	0.454	0.623	1	1	LFNG
RASSF4	0.00798495	0.135973	0.379	0.587	1	1	RASSF4
HAS3	0.00901918	0.0569759	0.276	0.442	1	1	HAS3
BTG2	0.00957326	0.0832269	0.429	0.615	1	1	BTG2
TTLL7	0.0096522	0.0813843	0.378	0.557	1	1	TTLL7
IL321	0	0.376016	1	0.997	0	2	IL32
PLCXD21	0	0.327079	0.944	0.745	0	2	PLCXD2
OCIAD21	0	0.32372	1	0.993	0	2	OCIAD2
GSTP11	0	0.294974	1	1	0	2	GSTP1
KRT19	0	0.284174	0.997	0.945	0	2	KRT19
LRRC171	0	0.261979	0.976	0.875	0	2	LRRC17
SOX41	0	0.261156	1	0.99	0	2	SOX4
PLA2G16	0	0.25851	0.986	0.9	0	2	PLA2G16
CKB	0	0.25605	0.898	0.747	0	2	CKB
FILIP1L1	0	0.231319	0.969	0.81	0	2	FILIP1L
AAMDC	0	0.227727	0.969	0.851	0	2	AAMDC
CSRP2	0	0.223836	0.928	0.799	0	2	CSRP2
ORMDL2	0	0.223631	0.987	0.898	0	2	ORMDL2
C15orf481	0	0.218588	0.946	0.841	0	2	C15orf48
PADI21	0	0.214244	0.871	0.745	0	2	PADI2
CYBA	0	0.212208	1	0.992	0	2	CYBA
RAB32	0	0.204284	0.996	0.951	0	2	RAB32
SPINT21	0	0.203198	0.998	0.967	0	2	SPINT2
TRIM55	0	0.195277	0.821	0.662	0	2	TRIM55
EDN1	0	0.194352	0.888	0.715	0	2	EDN1
ARHGAP29	0	0.194351	0.988	0.895	0	2	ARHGAP29
S100A13	0	0.191722	1	0.996	0	2	S100A13
GLIPR1	0	0.189998	0.994	0.929	0	2	GLIPR1
C12orf75	0	0.189897	1	0.996	0	2	C12orf75
FEZ11	0	0.184723	0.982	0.883	0	2	FEZ1
MCAM1	0	0.183798	0.902	0.78	0	2	MCAM
TSPO	0	0.183795	1	0.997	0	2	TSPO
RNASET21	0	0.18293	0.887	0.73	0	2	RNASET2
NDUFC2	0	0.182272	1	0.98	0	2	NDUFC2
CXCL8	0	0.179248	0.985	0.905	0	2	CXCL8
NNMT	0	0.178399	0.999	0.98	0	2	NNMT
F3	0	0.177685	0.871	0.618	0	2	F3
TNC1	0	0.177203	0.862	0.769	0	2	TNC
CPA4	0	0.175497	0.921	0.753	0	2	CPA4
PDLIM1	0	0.174357	0.983	0.917	0	2	PDLIM1
ANKRD1	0	0.171654	0.997	0.964	0	2	ANKRD1
GPRC5A1	0	0.171633	0.851	0.657	0	2	GPRC5A
SOD1	0	0.170545	1	0.988	0	2	SOD1
PRSS231	0	0.170406	0.983	0.917	0	2	PRSS23
LAMC21	0	0.169964	0.967	0.827	0	2	LAMC2
PDLIM4	0	0.163183	0.988	0.936	0	2	PDLIM4
DLG11	0	0.161708	0.972	0.883	0	2	DLG1
KRTAP2-3	0	0.159182	0.737	0.532	0	2	KRTAP2-3
CD63	0	0.156129	1	0.999	0	2	CD63
CYSTM1	0	0.153689	0.964	0.861	0	2	CYSTM1
ITGAE	0	0.152996	0.937	0.824	0	2	ITGAE
S100A10	0	0.146172	1	0.996	0	2	S100A10
FLJ22447	0	0.146153	0.758	0.533	0	2	FLJ22447
CXCL11	0	0.142811	0.995	0.96	0	2	CXCL1
TNFSF101	0	0.1418	0.946	0.861	0	2	TNFSF10
FAM134B1	0	0.139862	0.668	0.542	0	2	FAM134B
ISG15	0	0.138388	0.995	0.937	0	2	ISG15
RRAS	0	0.137052	0.982	0.916	0	2	RRAS
GSTM3	0	0.136099	0.883	0.738	0	2	GSTM3
ARID5B	0	0.135389	0.883	0.724	0	2	ARID5B
TUBA1A	0	0.134224	0.988	0.926	0	2	TUBA1A
SPP11	0	0.13265	0.963	0.888	0	2	SPP1
MAL21	0	0.132376	0.894	0.727	0	2	MAL2
CTD-3138B18.51	0	0.132061	0.899	0.704	0	2	CTD-3138B18.5
TAGLN	0	0.13144	1	0.992	0	2	TAGLN
LTB1	0	0.131144	0.822	0.704	0	2	LTB
CAV1	0	0.129448	0.999	0.98	0	2	CAV1
MAP3K7CL1	0	0.123683	0.81	0.643	0	2	MAP3K7CL
L1CAM1	0	0.122673	0.75	0.547	0	2	L1CAM
UCHL1	0	0.121159	1	0.998	0	2	UCHL1
TGFB21	0	0.12104	0.854	0.694	0	2	TGFB2
STAT11	0	0.120778	0.921	0.785	0	2	STAT1
PPP1R14A	0	0.120541	0.853	0.629	0	2	PPP1R14A
ADAMTS51	0	0.120193	0.918	0.827	0	2	ADAMTS5
RAB11FIP11	0	0.117547	0.807	0.629	0	2	RAB11FIP1
IGFBP71	0	0.115889	1	1	0	2	IGFBP7
EFNA11	0	0.115844	0.733	0.585	0	2	EFNA1
DYNLL1	0	0.11384	1	0.997	0	2	DYNLL1
UCP2	0	0.11355	0.887	0.766	0	2	UCP2
LRRC8A1	0	0.112584	0.885	0.736	0	2	LRRC8A
EPPK1	0	0.111256	0.831	0.623	0	2	EPPK1
CSF2	0	0.111097	0.947	0.818	0	2	CSF2
STK38L1	0	0.110513	0.745	0.571	0	2	STK38L
IGFBP21	0	0.107676	0.801	0.621	0	2	IGFBP2
LINC007041	0	0.106507	0.785	0.618	0	2	LINC00704
S100A11	0	0.104506	1	0.999	0	2	S100A11
C1orf143	0	0.103586	0.623	0.395	0	2	C1orf143
MYL12A	0	0.100534	1	0.998	0	2	MYL12A
PCSK1N1	0	0.100302	0.865	0.761	0	2	PCSK1N
FKBP1B	0	0.0981052	0.832	0.661	0	2	FKBP1B
C8orf4	0	0.0942945	0.805	0.674	0	2	C8orf4
RP11-395G23.3	0	0.0937157	0.877	0.739	0	2	RP11-395G23.3
TAGLN3	0	0.0934772	0.72	0.564	0	2	TAGLN3
NPPB	0	0.0934189	0.972	0.878	0	2	NPPB
NCF21	0	0.0922847	0.754	0.604	0	2	NCF2
CXCL61	0	0.0916322	0.989	0.921	0	2	CXCL6
CD70	0	0.0905604	0.83	0.68	0	2	CD70
TUBB2B	0	0.0904051	0.816	0.648	0	2	TUBB2B
GPRC5C1	0	0.0887306	0.917	0.784	0	2	GPRC5C
BPGM1	0	0.0882072	0.839	0.704	0	2	BPGM
ABCB11	0	0.0873754	0.754	0.623	0	2	ABCB1
CALD1	0	0.0855714	1	0.998	0	2	CALD1
CRB3	0	0.0844484	0.672	0.472	0	2	CRB3
GPN1	0	0.0826855	0.725	0.462	0	2	GPN1
CXCL5	0	0.081035	0.785	0.668	0	2	CXCL5
SGIP1	0	0.0784782	0.73	0.487	0	2	SGIP1
MECOM1	0	0.0769683	0.84	0.628	0	2	MECOM
EPS8L11	0	0.0762452	0.849	0.703	0	2	EPS8L1
CDKN1C1	0	0.0748795	0.927	0.795	0	2	CDKN1C
ITGB8	0	0.0724628	0.809	0.696	0	2	ITGB8
C1orf54	0	0.0716937	0.895	0.73	0	2	C1orf54
LINC009601	0	0.0702719	0.855	0.617	0	2	LINC00960
WNT7B	0	0.0686113	0.899	0.739	0	2	WNT7B
EDN21	0	0.067838	0.755	0.605	0	2	EDN2
TNFRSF10D1	0	0.0664667	0.867	0.704	0	2	TNFRSF10D
RAB27A	0	0.0659737	0.742	0.514	0	2	RAB27A
RASGRF21	0	0.0632393	0.742	0.534	0	2	RASGRF2
RP11-254I22.3	0	0.0616484	0.708	0.556	0	2	RP11-254I22.3
TNF1	0	0.06008	0.777	0.64	0	2	TNF
GDF51	0	0.0595217	0.894	0.715	0	2	GDF5
PLEKHH2	0	0.0590187	0.779	0.695	0	2	PLEKHH2
FBN11	0	0.057003	0.997	0.977	0	2	FBN1
NKAIN41	0	0.056573	0.892	0.778	0	2	NKAIN4
SNN1	0	0.0564114	0.781	0.636	0	2	SNN
TNFAIP3	0	0.0558434	0.904	0.74	0	2	TNFAIP3
SFTA1P	0	0.0548582	0.61	0.362	0	2	SFTA1P
TNFAIP21	0	0.0543419	0.864	0.716	0	2	TNFAIP2
CLDN21	0	0.0534073	0.787	0.64	0	2	CLDN2
BMP4	0	0.0521073	0.84	0.587	0	2	BMP4
AC002454.1	0	0.0510272	0.693	0.521	0	2	AC002454.1
RP11-277P12.201	0	0.0507774	0.903	0.715	0	2	RP11-277P12.20
SYNGR11	1.72e-304	0.051935	0.819	0.652	3.44e-301	2	SYNGR1
TUFT1	1.2e-302	0.124817	0.64	0.448	2.39e-299	2	TUFT1
SUGCT	1.49e-302	0.0975302	0.807	0.678	2.99e-299	2	SUGCT
NTN41	1.05e-299	0.0950571	0.806	0.684	2.09e-296	2	NTN4
TM7SF21	2.25e-290	0.0744705	0.778	0.638	4.49e-287	2	TM7SF2
RP11-295G20.2	6.9e-289	0.0725787	0.873	0.677	1.38e-285	2	RP11-295G20.2
NEXN	1.08e-285	0.138512	0.937	0.818	2.15e-282	2	NEXN
REEP5	5.05e-285	0.127566	0.993	0.942	1.01e-281	2	REEP5
SHISA91	8.91e-283	0.0507345	0.632	0.475	1.78e-279	2	SHISA9
LIMA1	5.97e-282	0.134223	0.963	0.856	1.19e-278	2	LIMA1
BDH2	2.5e-280	0.0640577	0.836	0.679	5e-277	2	BDH2
CYTL11	3.61e-277	0.0701046	0.767	0.674	7.23e-274	2	CYTL1
SLC25A4	5.22e-276	0.129742	0.934	0.786	1.04e-272	2	SLC25A4
SYCE1L1	1.55e-275	0.0827647	0.756	0.605	3.11e-272	2	SYCE1L
FUOM	1.06e-273	0.097583	0.905	0.764	2.13e-270	2	FUOM
MYL9	5.34e-272	0.0951731	0.999	0.962	1.07e-268	2	MYL9
IGFBP5	2.82e-271	0.116038	0.95	0.839	5.64e-268	2	IGFBP5
MYEOV	4.82e-267	0.118169	0.749	0.605	9.63e-264	2	MYEOV
MT1F1	9.98e-267	0.132015	0.691	0.545	2e-263	2	MT1F
CDKN1A1	3.61e-262	0.0727764	0.991	0.926	7.22e-259	2	CDKN1A
BLVRA	7.2e-261	0.118385	0.841	0.725	1.44e-257	2	BLVRA
ATP5G3	1.44e-254	0.108441	1	0.986	2.87e-251	2	ATP5G3
MAP1LC3A1	2.2e-251	0.0855238	0.865	0.771	4.39e-248	2	MAP1LC3A
GOPC	1.52e-248	0.130676	0.894	0.775	3.05e-245	2	GOPC
ACOT13	6.52e-244	0.0988682	0.929	0.822	1.3e-240	2	ACOT13
SPNS21	5.86e-243	0.0742028	0.756	0.651	1.17e-239	2	SPNS2
PFN1	7.83e-241	0.0891076	1	1	1.57e-237	2	PFN1
TP53I3	2.97e-234	0.0925542	0.848	0.694	5.94e-231	2	TP53I3
USP53	3.51e-234	0.0757186	0.91	0.748	7.01e-231	2	USP53
IGFBP31	3.8e-231	0.0549643	0.735	0.55	7.6e-228	2	IGFBP3
CASP31	1.04e-223	0.111045	0.766	0.64	2.08e-220	2	CASP3
ARPC3	4.33e-213	0.0946341	1	0.987	8.66e-210	2	ARPC3
TRIM16L1	5.42e-206	0.0559379	0.726	0.571	1.08e-202	2	TRIM16L
EZR	5.53e-205	0.108359	0.96	0.868	1.11e-201	2	EZR
KRT17	1.44e-203	0.0508368	0.646	0.478	2.88e-200	2	KRT17
HACD1	3.36e-201	0.0721543	0.922	0.766	6.71e-198	2	HACD1
PKIB	7.66e-195	0.0836472	0.778	0.672	1.53e-191	2	PKIB
RP5-1172A22.1	1.36e-192	0.0569772	0.705	0.574	2.72e-189	2	RP5-1172A22.1
KRT7	3.2e-190	0.110939	0.97	0.855	6.4e-187	2	KRT7
COX7B	7.72e-190	0.0975901	0.995	0.961	1.54e-186	2	COX7B
AK41	4.28e-180	0.0861255	0.589	0.374	8.57e-177	2	AK4
MAP1LC3B	6.28e-176	0.0905611	0.98	0.916	1.26e-172	2	MAP1LC3B
MLLT11	2.73e-175	0.0833924	0.933	0.815	5.47e-172	2	MLLT11
LGALS3	3.06e-175	0.0586854	0.863	0.701	6.11e-172	2	LGALS3
AK51	1.82e-170	0.0683799	0.683	0.547	3.65e-167	2	AK5
SNX10	6.62e-168	0.0695889	0.593	0.469	1.32e-164	2	SNX10
TSPAN2	1.28e-165	0.172795	0.586	0.459	2.56e-162	2	TSPAN2
AIF1L1	2.28e-160	0.10809	0.595	0.437	4.55e-157	2	AIF1L
A1BG1	5.15e-160	0.0590321	0.956	0.861	1.03e-156	2	A1BG
GFRA1	1.83e-158	0.0654008	0.805	0.695	3.66e-155	2	GFRA1
BAMBI	1.41e-157	0.0676149	0.674	0.573	2.81e-154	2	BAMBI
FHL2	1.67e-154	0.0951549	0.988	0.936	3.35e-151	2	FHL2
RHOF	8.98e-154	0.0553526	0.891	0.756	1.8e-150	2	RHOF
DHCR241	2.97e-153	0.0733006	0.743	0.597	5.93e-150	2	DHCR24
FAM84B1	2.76e-152	0.0557518	0.722	0.623	5.52e-149	2	FAM84B
SDC2	5.05e-149	0.076691	0.822	0.681	1.01e-145	2	SDC2
TUBB2A	1.65e-148	0.0711946	0.889	0.737	3.29e-145	2	TUBB2A
DNAJC1	3.66e-147	0.0748396	0.884	0.769	7.31e-144	2	DNAJC1
AP1S3	1.77e-146	0.0551029	0.638	0.476	3.53e-143	2	AP1S3
MT2A	1.07e-143	0.0708256	1	1	2.14e-140	2	MT2A
CDH131	1.22e-142	0.0589059	0.897	0.749	2.44e-139	2	CDH13
AKR1B11	7.1e-140	0.0694242	0.976	0.91	1.42e-136	2	AKR1B1
ATP5J2	4.76e-137	0.0708919	0.999	0.989	9.52e-134	2	ATP5J2
PLAU1	3.22e-136	0.0735574	0.987	0.939	6.44e-133	2	PLAU
RHOB1	2e-131	0.0676474	0.731	0.616	4e-128	2	RHOB
PPME1	2.08e-131	0.0919342	0.814	0.715	4.16e-128	2	PPME1
CALM1	2.26e-129	0.0740101	1	0.988	4.51e-126	2	CALM1
LACTB2	1.43e-126	0.0719551	0.635	0.525	2.85e-123	2	LACTB2
UCHL3	5.75e-126	0.0856564	0.908	0.797	1.15e-122	2	UCHL3
EMC3	4.21e-125	0.0685759	0.893	0.769	8.41e-122	2	EMC3
LBH1	4.69e-125	0.110135	0.679	0.615	9.37e-122	2	LBH
MORC41	1.23e-123	0.0534072	0.849	0.766	2.46e-120	2	MORC4
LINC009731	1.22e-121	0.0607612	0.756	0.606	2.44e-118	2	LINC00973
MT1X	7.41e-120	0.0857721	0.878	0.76	1.48e-116	2	MT1X
RER1	2.22e-116	0.0818314	0.992	0.942	4.43e-113	2	RER1
MYL12B	6.7e-116	0.0581649	1	0.997	1.34e-112	2	MYL12B
PEG10	4.72e-114	0.0700253	0.694	0.539	9.43e-111	2	PEG10
CD9	2.28e-105	0.092046	0.938	0.829	4.56e-102	2	CD9
TSTD1	2.92e-105	0.0593598	0.692	0.601	5.84e-102	2	TSTD1
CHCHD6	1.06e-99	0.0702496	0.808	0.719	2.12e-96	2	CHCHD6
DHRS7	1.7e-90	0.0516904	0.768	0.641	3.4e-87	2	DHRS7
RND3	4.78e-89	0.0512702	0.897	0.808	9.56e-86	2	RND3
ETHE1	7.93e-85	0.0621784	0.912	0.822	1.59e-81	2	ETHE1
RSU1	7.88e-84	0.0537171	0.887	0.758	1.58e-80	2	RSU1
ATP5O	4.38e-78	0.0641817	0.992	0.951	8.76e-75	2	ATP5O
RGS5	2.16e-75	0.0764962	0.479	0.309	4.31e-72	2	RGS5
OTUB21	5.53e-68	0.0613391	0.508	0.347	1.11e-64	2	OTUB2
KCNJ161	2.1e-67	0.0517033	0.639	0.595	4.2e-64	2	KCNJ16
SFRP11	2.27e-66	0.053622	0.691	0.616	4.53e-63	2	SFRP1
DCBLD1	1.84e-65	0.050298	0.636	0.519	3.67e-62	2	DCBLD1
HIST1H2BD	4.93e-59	0.0738219	0.537	0.414	9.86e-56	2	HIST1H2BD
PDGFB1	6.28e-57	0.0890616	0.617	0.563	1.26e-53	2	PDGFB
QPRT1	2.52e-56	0.0619416	0.551	0.413	5.05e-53	2	QPRT
NDUFB8	1.39e-55	0.0551878	0.995	0.946	2.78e-52	2	NDUFB8
LFNG1	1.69e-54	0.0557666	0.631	0.557	3.37e-51	2	LFNG
FLG	2.63e-51	0.0924303	0.434	0.265	5.26e-48	2	FLG
TP53BP21	5.89e-44	0.064618	0.606	0.533	1.18e-40	2	TP53BP2
TGFBR11	3.61e-42	0.0511168	0.601	0.508	7.22e-39	2	TGFBR1
CFAP58	1.53e-37	0.0669558	0.486	0.359	3.05e-34	2	CFAP58
KRT80	3.08e-32	0.0520304	0.521	0.419	6.16e-29	2	KRT80
TMEM1391	1.88e-25	0.0732464	0.52	0.438	3.76e-22	2	TMEM139
RASSF41	1.78e-16	0.0544057	0.579	0.525	3.57e-13	2	RASSF4
MAL	1.49e-13	0.0577575	0.429	0.396	2.97e-10	2	MAL
SYTL2	3.85e-09	0.0591248	0.477	0.39	7.71e-06	2	SYTL2
TMEM92	0.000633992	0.0588494	0.538	0.495	1	2	TMEM92
HMGA1	0	0.677853	0.999	0.962	0	3	HMGA1
TUBA1B	0	0.535472	0.965	0.853	0	3	TUBA1B
RPL22L1	0	0.515438	0.943	0.803	0	3	RPL22L1
G0S2	0	0.485812	0.714	0.552	0	3	G0S2
HNRNPA1	0	0.473282	0.993	0.948	0	3	HNRNPA1
NPM1	0	0.473061	0.998	0.972	0	3	NPM1
KCNMA1	0	0.465984	0.857	0.638	0	3	KCNMA1
EIF4EBP1	0	0.455687	0.979	0.875	0	3	EIF4EBP1
S100A2	0	0.404527	0.893	0.76	0	3	S100A2
MT1E	0	0.396074	0.998	0.988	0	3	MT1E
LDHA	0	0.387847	0.99	0.95	0	3	LDHA
SRGN	0	0.383012	0.92	0.752	0	3	SRGN
LDHB	0	0.35815	0.998	0.983	0	3	LDHB
C1QBP	0	0.349425	0.975	0.917	0	3	C1QBP
LYPD1	0	0.341174	0.92	0.81	0	3	LYPD1
HSPD1	0	0.341111	0.952	0.799	0	3	HSPD1
EIF5A	0	0.338634	0.997	0.983	0	3	EIF5A
EBNA1BP2	0	0.333964	0.945	0.867	0	3	EBNA1BP2
NCL	0	0.314651	0.992	0.959	0	3	NCL
HMGB1	0	0.303844	0.997	0.978	0	3	HMGB1
STOML2	0	0.300961	0.949	0.847	0	3	STOML2
ANXA3	0	0.300837	0.944	0.863	0	3	ANXA3
FABP5	0	0.299629	0.974	0.928	0	3	FABP5
ANP32B	0	0.29469	0.923	0.804	0	3	ANP32B
CMSS1	0	0.291369	0.765	0.7	0	3	CMSS1
SLC25A5	0	0.291215	0.982	0.943	0	3	SLC25A5
SNRPB	0	0.290314	0.983	0.931	0	3	SNRPB
PLAUR	0	0.285105	0.925	0.829	0	3	PLAUR
ENO1	0	0.284413	0.995	0.983	0	3	ENO1
AKAP12	0	0.282103	0.991	0.983	0	3	AKAP12
HNRNPD	0	0.279896	0.955	0.844	0	3	HNRNPD
GNG11	0	0.27679	0.947	0.882	0	3	GNG11
COPS6	0	0.273028	0.916	0.815	0	3	COPS6
IFITM2	0	0.272096	0.89	0.777	0	3	IFITM2
FBL	0	0.268722	0.848	0.697	0	3	FBL
GAPDH	0	0.266372	1	1	0	3	GAPDH
NT5C	0	0.266177	0.871	0.763	0	3	NT5C
KRT18	0	0.26417	0.998	0.986	0	3	KRT18
MANF	0	0.262149	0.958	0.877	0	3	MANF
HNRNPA2B1	0	0.261682	0.975	0.915	0	3	HNRNPA2B1
RAN	0	0.261463	0.998	0.988	0	3	RAN
SRI	0	0.253367	0.975	0.92	0	3	SRI
HSP90AB1	0	0.25228	0.998	0.989	0	3	HSP90AB1
GTF3A	0	0.252153	0.926	0.822	0	3	GTF3A
MRPL12	0	0.252095	0.952	0.893	0	3	MRPL12
CYR61	0	0.251787	0.965	0.952	0	3	CYR61
PRDX1	0	0.251145	0.997	0.972	0	3	PRDX1
CCT2	0	0.250701	0.936	0.827	0	3	CCT2
GPATCH4	0	0.249006	0.848	0.716	0	3	GPATCH4
PFDN2	0	0.248772	0.986	0.954	0	3	PFDN2
PRMT1	0	0.247686	0.933	0.86	0	3	PRMT1
RANBP1	0	0.247446	0.979	0.942	0	3	RANBP1
RGS10	0	0.24713	0.963	0.9	0	3	RGS10
NME1	0	0.246924	0.984	0.955	0	3	NME1
SRSF7	0	0.246719	0.844	0.694	0	3	SRSF7
TUBA1C	0	0.24518	0.907	0.764	0	3	TUBA1C
TNFRSF12A	0	0.244265	0.993	0.964	0	3	TNFRSF12A
YBX3	0	0.244025	0.921	0.826	0	3	YBX3
PPIB	0	0.239662	0.999	0.992	0	3	PPIB
TUBB6	0	0.236899	0.929	0.848	0	3	TUBB6
SRSF3	0	0.235744	0.918	0.769	0	3	SRSF3
GALE	0	0.228988	0.829	0.748	0	3	GALE
HMGN2	0	0.228152	0.934	0.834	0	3	HMGN2
HNRNPDL	0	0.227792	0.938	0.856	0	3	HNRNPDL
SDF2L1	0	0.227502	0.947	0.893	0	3	SDF2L1
ODC1	0	0.226451	0.945	0.882	0	3	ODC1
CENPV	0	0.223217	0.869	0.777	0	3	CENPV
ECI2	0	0.220298	0.9	0.822	0	3	ECI2
SIGLEC15	0	0.219966	0.879	0.744	0	3	SIGLEC15
TFPI2	0	0.219207	0.794	0.699	0	3	TFPI2
HMGA2	0	0.219072	0.928	0.84	0	3	HMGA2
ANXA10	0	0.218325	0.871	0.769	0	3	ANXA10
PLP2	0	0.216859	0.98	0.929	0	3	PLP2
SNRPD1	0	0.212951	0.989	0.963	0	3	SNRPD1
MYDGF	0	0.210362	0.993	0.971	0	3	MYDGF
SRM	0	0.209115	0.97	0.936	0	3	SRM
TUBB	0	0.208773	0.994	0.977	0	3	TUBB
NOP56	0	0.20858	0.799	0.622	0	3	NOP56
KIAA0101	0	0.207639	0.742	0.664	0	3	KIAA0101
CYCS	0	0.204905	0.946	0.862	0	3	CYCS
FXYD5	0	0.20292	0.989	0.943	0	3	FXYD5
PRELID1	0	0.201239	0.993	0.973	0	3	PRELID1
HSPE1	0	0.199956	0.963	0.897	0	3	HSPE1
ACTB	0	0.199544	1	1	0	3	ACTB
MT2A1	0	0.198485	1	1	0	3	MT2A
HSP90B1	0	0.198254	0.996	0.984	0	3	HSP90B1
CCT5	0	0.193909	0.881	0.72	0	3	CCT5
DKK1	0	0.190585	0.84	0.779	0	3	DKK1
ANXA2	0	0.188138	1	1	0	3	ANXA2
ALDOA	0	0.182973	0.999	0.992	0	3	ALDOA
PSMB1	0	0.179628	0.985	0.944	0	3	PSMB1
HSP90AA1	0	0.177055	0.998	0.993	0	3	HSP90AA1
HHIP-AS1	0	0.165024	0.873	0.773	0	3	HHIP-AS1
H2AFZ	0	0.161294	0.993	0.978	0	3	H2AFZ
EMP1	0	0.160677	0.786	0.687	0	3	EMP1
EEF1B2	0	0.146202	0.999	0.996	0	3	EEF1B2
SIX1	0	0.135942	0.815	0.705	0	3	SIX1
SLC7A2	0	0.134725	0.896	0.838	0	3	SLC7A2
MLPH	0	0.13107	0.819	0.724	0	3	MLPH
STC1	0	0.125269	0.73	0.492	0	3	STC1
CDH4	0	0.119558	0.846	0.755	0	3	CDH4
TBX3	0	0.115109	0.72	0.486	0	3	TBX3
PRSS3	0	0.0887524	0.835	0.775	0	3	PRSS3
TNNT1	0	0.0801742	0.668	0.469	0	3	TNNT1
WNK4	0	0.0649994	0.707	0.504	0	3	WNK4
NOG	0	0.0587707	0.751	0.61	0	3	NOG
TWIST2	0	0.0539884	0.798	0.733	0	3	TWIST2
HHIP	0	0.0521761	0.818	0.706	0	3	HHIP
LY6K	7.11e-308	0.258281	0.678	0.622	1.42e-304	3	LY6K
ATP5C1	9.51e-307	0.203056	0.908	0.795	1.9e-303	3	ATP5C1
ANPEP	9.99e-302	0.156219	0.749	0.686	2e-298	3	ANPEP
RGS20	7.68e-299	0.151974	0.712	0.53	1.54e-295	3	RGS20
TGM2	9.09e-297	0.171315	0.924	0.835	1.82e-293	3	TGM2
PFN11	5e-293	0.106088	1	1	1e-289	3	PFN1
PDPN	1.87e-285	0.0523473	0.817	0.773	3.74e-282	3	PDPN
ATP5G1	3.16e-284	0.155196	0.992	0.978	6.31e-281	3	ATP5G1
ARHGAP18	5.64e-284	0.215847	0.794	0.68	1.13e-280	3	ARHGAP18
MDH2	5.98e-284	0.178557	0.978	0.943	1.2e-280	3	MDH2
SSR3	5.14e-283	0.152967	0.987	0.968	1.03e-279	3	SSR3
TUBA4A	1.1e-282	0.192697	0.78	0.607	2.19e-279	3	TUBA4A
GAL	7.77e-281	0.163152	0.686	0.623	1.55e-277	3	GAL
KRT71	7.53e-280	0.261988	0.969	0.902	1.51e-276	3	KRT7
MRPL15	1.43e-277	0.206917	0.791	0.685	2.86e-274	3	MRPL15
UBE2L3	2.47e-277	0.175127	0.968	0.924	4.95e-274	3	UBE2L3
CTSC	2.5e-276	0.194258	0.922	0.88	5e-273	3	CTSC
BNIP3	1.94e-275	0.197444	0.948	0.885	3.87e-272	3	BNIP3
CYC1	6.06e-274	0.186275	0.955	0.895	1.21e-270	3	CYC1
PSAT1	2.55e-272	0.124387	0.761	0.604	5.1e-269	3	PSAT1
HSPA5	6.68e-266	0.224385	0.916	0.844	1.34e-262	3	HSPA5
B2M	1.82e-264	0.175665	0.998	0.993	3.64e-261	3	B2M
THSD4	2.54e-263	0.0602131	0.831	0.687	5.08e-260	3	THSD4
SMAGP	3.94e-263	0.2	0.76	0.66	7.88e-260	3	SMAGP
PHGDH	1.69e-262	0.0954684	0.674	0.611	3.39e-259	3	PHGDH
HOMER2	1.04e-261	0.113924	0.678	0.54	2.09e-258	3	HOMER2
SSB	5.03e-260	0.191979	0.918	0.818	1.01e-256	3	SSB
IMPDH2	1.66e-257	0.204921	0.824	0.722	3.33e-254	3	IMPDH2
NQO1	1.01e-255	0.217685	0.826	0.713	2.02e-252	3	NQO1
NOP16	1.07e-247	0.189439	0.795	0.692	2.14e-244	3	NOP16
FOSL1	9.64e-247	0.15724	0.775	0.677	1.93e-243	3	FOSL1
RALA	4.51e-245	0.173488	0.968	0.933	9.02e-242	3	RALA
EIF3E	5.75e-244	0.187317	0.933	0.824	1.15e-240	3	EIF3E
DDIT4	6.17e-244	0.055495	0.664	0.505	1.23e-240	3	DDIT4
HIST1H2BH	1.44e-241	0.0536229	0.526	0.36	2.88e-238	3	HIST1H2BH
SNHG19	3.75e-241	0.16728	0.762	0.667	7.51e-238	3	SNHG19
STRAP	2.92e-239	0.174189	0.924	0.869	5.84e-236	3	STRAP
NDUFB81	1.06e-237	0.157156	0.99	0.967	2.12e-234	3	NDUFB8
PROCR	1.59e-235	0.184088	0.79	0.697	3.18e-232	3	PROCR
TUBB4B	8.47e-235	0.114652	0.886	0.779	1.69e-231	3	TUBB4B
RBP1	1.21e-233	0.0571801	0.791	0.617	2.41e-230	3	RBP1
CCBE1	2.19e-233	0.0989515	0.645	0.588	4.39e-230	3	CCBE1
CCDC85B	2.4e-233	0.201243	0.949	0.889	4.79e-230	3	CCDC85B
FAM101B	1.53e-229	0.126835	0.867	0.776	3.06e-226	3	FAM101B
PLEK2	2.45e-228	0.18947	0.773	0.718	4.9e-225	3	PLEK2
NR2F2	9.43e-225	0.192847	0.87	0.76	1.89e-221	3	NR2F2
IGFBP6	1.43e-221	0.190482	0.923	0.846	2.86e-218	3	IGFBP6
SPHK1	4.83e-221	0.169368	0.932	0.863	9.66e-218	3	SPHK1
SNAPC1	2.4e-219	0.210371	0.723	0.611	4.8e-216	3	SNAPC1
PTTG1	3.4e-218	0.182821	0.722	0.621	6.81e-215	3	PTTG1
DUSP5	5.02e-217	0.0553832	0.585	0.431	1e-213	3	DUSP5
PHLDA2	2.93e-216	0.15067	0.981	0.945	5.86e-213	3	PHLDA2
HSPA8	6.55e-216	0.151583	0.952	0.901	1.31e-212	3	HSPA8
ARPC1A	1.27e-214	0.161041	0.966	0.914	2.55e-211	3	ARPC1A
GLRX3	2.08e-214	0.169097	0.896	0.831	4.17e-211	3	GLRX3
STC2	9.08e-212	0.147435	0.885	0.759	1.82e-208	3	STC2
TSPAN4	1.37e-210	0.17124	0.924	0.852	2.74e-207	3	TSPAN4
NANS	2.71e-210	0.172877	0.895	0.846	5.42e-207	3	NANS
CSF21	3.86e-210	0.156942	0.917	0.876	7.72e-207	3	CSF2
MRPL22	5.09e-209	0.164499	0.691	0.523	1.02e-205	3	MRPL22
OLA1	2.15e-208	0.1629	0.766	0.626	4.3e-205	3	OLA1
TXN	1.97e-207	0.105134	0.999	0.997	3.95e-204	3	TXN
PSMD8	7.34e-207	0.148378	0.966	0.926	1.47e-203	3	PSMD8
IGFBP51	8.13e-206	0.250791	0.923	0.889	1.63e-202	3	IGFBP5
CCT8	4.08e-205	0.148971	0.775	0.623	8.16e-202	3	CCT8
DKC1	2.07e-204	0.164427	0.697	0.571	4.14e-201	3	DKC1
ARG2	4.42e-204	0.0674995	0.653	0.57	8.83e-201	3	ARG2
ADAMTS1	7.22e-202	0.183485	0.758	0.612	1.44e-198	3	ADAMTS1
PAICS	8.26e-202	0.154922	0.662	0.479	1.65e-198	3	PAICS
RAD23A	1.27e-200	0.168386	0.9	0.834	2.55e-197	3	RAD23A
GSTO1	3.71e-200	0.117164	0.955	0.904	7.41e-197	3	GSTO1
EIF6	8.01e-199	0.145219	0.985	0.945	1.6e-195	3	EIF6
AIMP1	1.96e-198	0.157117	0.791	0.662	3.93e-195	3	AIMP1
FAM46A	1.54e-196	0.0559786	0.768	0.686	3.08e-193	3	FAM46A
TALDO1	2.23e-194	0.138895	0.98	0.956	4.46e-191	3	TALDO1
CACYBP	1.25e-192	0.150769	0.836	0.761	2.5e-189	3	CACYBP
RUVBL1	2.25e-191	0.165462	0.761	0.683	4.5e-188	3	RUVBL1
PSMA3	4.47e-191	0.154269	0.836	0.713	8.93e-188	3	PSMA3
CD3EAP	1.04e-190	0.157815	0.658	0.545	2.08e-187	3	CD3EAP
MRPS7	1.17e-190	0.152187	0.839	0.762	2.35e-187	3	MRPS7
PRKCDBP	3.71e-190	0.167976	0.839	0.755	7.42e-187	3	PRKCDBP
EEF1E1	8.77e-190	0.153691	0.765	0.651	1.75e-186	3	EEF1E1
VIM	7.26e-188	0.100699	1	1	1.45e-184	3	VIM
CRIP2	6.6e-187	0.168212	0.943	0.864	1.32e-183	3	CRIP2
SERTAD4-AS1	1.27e-186	0.112254	0.867	0.767	2.53e-183	3	SERTAD4-AS1
MGST1	5.71e-185	0.155216	0.679	0.523	1.14e-181	3	MGST1
SSRP1	3.4e-184	0.160437	0.757	0.631	6.8e-181	3	SSRP1
PSMB8	4.13e-184	0.186317	0.698	0.616	8.27e-181	3	PSMB8
CTNNAL1	2.02e-179	0.148892	0.816	0.667	4.05e-176	3	CTNNAL1
PTN	5.77e-177	0.0701474	0.667	0.643	1.15e-173	3	PTN
SSBP1	5.56e-176	0.144033	0.936	0.877	1.11e-172	3	SSBP1
TXNRD1	1.03e-175	0.165369	0.933	0.854	2.06e-172	3	TXNRD1
TUBA1A1	5.3e-174	0.175625	0.971	0.955	1.06e-170	3	TUBA1A
ADK	1.14e-173	0.14509	0.813	0.709	2.29e-170	3	ADK
DNAJB11	6.1e-173	0.151472	0.866	0.795	1.22e-169	3	DNAJB11
DCTPP1	3.67e-172	0.143928	0.879	0.825	7.33e-169	3	DCTPP1
PSMA4	1.57e-169	0.147536	0.93	0.855	3.14e-166	3	PSMA4
LIMD2	2.7e-169	0.159983	0.847	0.814	5.41e-166	3	LIMD2
TM4SF1	2.71e-169	0.158169	0.833	0.731	5.42e-166	3	TM4SF1
AK2	7.27e-169	0.150331	0.83	0.746	1.45e-165	3	AK2
PSMA5	2.11e-168	0.139394	0.95	0.911	4.22e-165	3	PSMA5
ARHGAP22	4.12e-167	0.109474	0.771	0.702	8.24e-164	3	ARHGAP22
SSSCA1	3.28e-165	0.148275	0.769	0.66	6.55e-162	3	SSSCA1
PSMA1	4.33e-165	0.146808	0.833	0.718	8.65e-162	3	PSMA1
VDAC2	2.99e-164	0.124339	0.986	0.969	5.97e-161	3	VDAC2
LSAMP1	2.3e-163	0.0519032	0.861	0.805	4.61e-160	3	LSAMP
MRPL24	3.15e-163	0.160108	0.847	0.787	6.3e-160	3	MRPL24
MRPL3	3.74e-162	0.151024	0.701	0.59	7.47e-159	3	MRPL3
CAMK2N1	2.01e-159	0.121217	0.884	0.832	4.02e-156	3	CAMK2N1
MRPL4	1.57e-157	0.145278	0.82	0.749	3.13e-154	3	MRPL4
ILK	4.61e-157	0.147799	0.857	0.803	9.21e-154	3	ILK
CEBPB	6.82e-156	0.054206	0.859	0.798	1.36e-152	3	CEBPB
RRP7A	2.55e-155	0.14797	0.773	0.742	5.11e-152	3	RRP7A
WDR18	2.75e-155	0.169174	0.732	0.689	5.51e-152	3	WDR18
SUPT16H	9.52e-155	0.12851	0.807	0.709	1.9e-151	3	SUPT16H
KRT8	1.76e-154	0.125236	0.993	0.978	3.52e-151	3	KRT8
CITED4	3e-154	0.128627	0.856	0.785	6e-151	3	CITED4
TRIB3	4.63e-153	0.102165	0.622	0.544	9.26e-150	3	TRIB3
GYPC	2.01e-152	0.126205	0.754	0.661	4.03e-149	3	GYPC
ADAMTS6	5.43e-151	0.11012	0.875	0.789	1.09e-147	3	ADAMTS6
RRAD	4.59e-150	0.113998	0.78	0.688	9.19e-147	3	RRAD
MDK	6.61e-148	0.152339	0.818	0.79	1.32e-144	3	MDK
MTHFD2	7.54e-148	0.100361	0.799	0.669	1.51e-144	3	MTHFD2
MRTO4	4.72e-147	0.129356	0.645	0.503	9.44e-144	3	MRTO4
C14orf166	8.89e-147	0.133024	0.971	0.941	1.78e-143	3	C14orf166
ATP5O1	3.68e-146	0.1191	0.99	0.968	7.36e-143	3	ATP5O
FGF5	3.85e-146	0.139746	0.691	0.566	7.7e-143	3	FGF5
RFXANK	7.59e-146	0.141513	0.842	0.81	1.52e-142	3	RFXANK
NAA20	2.78e-145	0.135294	0.732	0.616	5.56e-142	3	NAA20
CDC123	4.87e-140	0.125339	0.772	0.665	9.74e-137	3	CDC123
ZNF22	1.53e-139	0.142021	0.708	0.606	3.07e-136	3	ZNF22
LYAR	1.68e-139	0.148765	0.656	0.569	3.35e-136	3	LYAR
PHLDA1	2.48e-139	0.156175	0.939	0.901	4.96e-136	3	PHLDA1
NMB	5.07e-139	0.0805242	0.863	0.774	1.01e-135	3	NMB
NDUFAF4	8.17e-139	0.132405	0.781	0.724	1.63e-135	3	NDUFAF4
GLRX	1.47e-138	0.132284	0.981	0.962	2.95e-135	3	GLRX
TAF9	3.55e-137	0.13579	0.871	0.811	7.1e-134	3	TAF9
MRPL40	2.52e-136	0.128921	0.88	0.824	5.04e-133	3	MRPL40
PSMB2	4.18e-136	0.120915	0.97	0.942	8.36e-133	3	PSMB2
PSIP1	2.44e-135	0.106223	0.626	0.542	4.89e-132	3	PSIP1
ID1	2.87e-135	0.145361	0.843	0.742	5.74e-132	3	ID1
IFRD2	9.36e-135	0.139174	0.65	0.557	1.87e-131	3	IFRD2
MGLL	1.63e-132	0.13293	0.877	0.817	3.26e-129	3	MGLL
ASNS	1.16e-129	0.0507042	0.573	0.465	2.32e-126	3	ASNS
PPP1R7	3.49e-129	0.124743	0.786	0.669	6.98e-126	3	PPP1R7
COX5A	5.53e-129	0.114907	0.97	0.942	1.11e-125	3	COX5A
LINC01116	6.4e-129	0.142152	0.71	0.628	1.28e-125	3	LINC01116
PSMD6	9.08e-126	0.108343	0.663	0.512	1.82e-122	3	PSMD6
PARP1	1.01e-125	0.125358	0.845	0.763	2.02e-122	3	PARP1
CAPG	3.82e-124	0.129597	0.834	0.749	7.64e-121	3	CAPG
IFT57	5.1e-123	0.130603	0.647	0.531	1.02e-119	3	IFT57
RRP15	1.47e-122	0.125333	0.656	0.549	2.94e-119	3	RRP15
PSMB3	8.15e-120	0.116417	0.954	0.903	1.63e-116	3	PSMB3
PUM3	2.97e-119	0.117934	0.633	0.491	5.94e-116	3	PUM3
C21orf59	5.77e-118	0.137061	0.748	0.708	1.15e-114	3	C21orf59
PSMD7	6.37e-118	0.115043	0.958	0.929	1.27e-114	3	PSMD7
RP13-463N16.6	8.84e-118	0.0550639	0.514	0.415	1.77e-114	3	RP13-463N16.6
BIRC5	1.14e-117	0.113595	0.599	0.574	2.27e-114	3	BIRC5
LGALS31	2.9e-117	0.132525	0.826	0.775	5.81e-114	3	LGALS3
CITED2	4.27e-117	0.137033	0.803	0.709	8.55e-114	3	CITED2
GGH	1.35e-116	0.0939382	0.87	0.749	2.69e-113	3	GGH
GNL3	2.43e-116	0.125258	0.646	0.514	4.85e-113	3	GNL3
MRPS14	2.45e-116	0.134233	0.648	0.549	4.9e-113	3	MRPS14
FRMD4A	2.02e-115	0.0909816	0.781	0.711	4.03e-112	3	FRMD4A
GRPEL1	7.86e-115	0.111122	0.768	0.677	1.57e-111	3	GRPEL1
VDAC3	1.95e-114	0.124351	0.792	0.726	3.89e-111	3	VDAC3
GCHFR1	5.81e-114	0.166952	0.907	0.868	1.16e-110	3	GCHFR
MOK	6.25e-113	0.0868707	0.77	0.634	1.25e-109	3	MOK
AIMP2	2.87e-112	0.125954	0.694	0.63	5.74e-109	3	AIMP2
KRT191	4.13e-112	0.131736	0.991	0.968	8.26e-109	3	KRT19
PDIA3	5.27e-112	0.118065	0.941	0.9	1.05e-108	3	PDIA3
C19orf48	1.15e-111	0.12466	0.681	0.593	2.29e-108	3	C19orf48
ACOT9	2.55e-109	0.127797	0.691	0.631	5.11e-106	3	ACOT9
PLIN2	4.63e-109	0.148063	0.732	0.647	9.25e-106	3	PLIN2
ESD	5.29e-109	0.116302	0.806	0.704	1.06e-105	3	ESD
NIFK	6.37e-109	0.109017	0.731	0.613	1.27e-105	3	NIFK
NUDT5	9.26e-107	0.11123	0.886	0.848	1.85e-103	3	NUDT5
MRPS18C	2.49e-106	0.108566	0.74	0.621	4.98e-103	3	MRPS18C
NOP58	2.5e-106	0.112492	0.639	0.531	4.99e-103	3	NOP58
ICT1	2.4e-105	0.142758	0.709	0.67	4.8e-102	3	ICT1
MRPL16	4.14e-105	0.134065	0.718	0.671	8.29e-102	3	MRPL16
SLC16A1-AS1	2.11e-104	0.0726013	0.653	0.566	4.21e-101	3	SLC16A1-AS1
HBEGF	3.17e-104	0.13848	0.848	0.802	6.33e-101	3	HBEGF
SNHG7	3.87e-104	0.119896	0.879	0.824	7.74e-101	3	SNHG7
PSMC4	6.45e-104	0.113121	0.695	0.585	1.29e-100	3	PSMC4
HEXB	3.04e-103	0.0897273	0.721	0.627	6.07e-100	3	HEXB
BZW2	4.23e-103	0.103582	0.633	0.502	8.45e-100	3	BZW2
UQCRC2	5.6e-103	0.116407	0.73	0.637	1.12e-99	3	UQCRC2
DUT	4.84e-102	0.10166	0.862	0.78	9.68e-99	3	DUT
PPIF	1.13e-101	0.102036	0.683	0.603	2.26e-98	3	PPIF
VEGFC	2.24e-101	0.0785562	0.591	0.5	4.48e-98	3	VEGFC
PMAIP1	4.73e-101	0.131665	0.717	0.66	9.47e-98	3	PMAIP1
MDH1	3.36e-100	0.108898	0.708	0.594	6.71e-97	3	MDH1
FGF1	3.74e-100	0.0720387	0.854	0.764	7.48e-97	3	FGF1
HMBS	9.7e-100	0.121334	0.649	0.576	1.94e-96	3	HMBS
RBP7	3.35e-99	0.0539832	0.316	0.421	6.7e-96	3	RBP7
EIF5	5e-99	0.101633	0.969	0.946	1e-95	3	EIF5
ARPC31	8.49e-99	0.0822397	0.998	0.992	1.7e-95	3	ARPC3
C16orf74	2.87e-98	0.0600587	0.718	0.712	5.73e-95	3	C16orf74
PTX3	3.52e-98	0.0629034	0.712	0.688	7.03e-95	3	PTX3
DNMT1	1.14e-97	0.113485	0.709	0.634	2.29e-94	3	DNMT1
PAK1IP1	2.13e-97	0.109286	0.539	0.407	4.26e-94	3	PAK1IP1
STMN3	3.82e-96	0.0795648	0.573	0.503	7.64e-93	3	STMN3
TMEM126A	3.87e-96	0.119631	0.783	0.722	7.74e-93	3	TMEM126A
PGK1	4.47e-96	0.101066	0.941	0.903	8.94e-93	3	PGK1
ZNF581	4.47e-96	0.112278	0.799	0.764	8.94e-93	3	ZNF581
CEP170	1.1e-95	0.0835859	0.826	0.734	2.2e-92	3	CEP170
JUN	6.07e-95	0.0990586	0.812	0.697	1.21e-91	3	JUN
ILF2	2e-93	0.107995	0.719	0.624	4.01e-90	3	ILF2
CFL2	3.47e-93	0.0866457	0.769	0.663	6.95e-90	3	CFL2
RRS1	1.78e-92	0.137055	0.56	0.45	3.55e-89	3	RRS1
LINC00958	1.71e-91	0.11659	0.82	0.765	3.42e-88	3	LINC00958
MRPL18	3.37e-91	0.100074	0.908	0.853	6.73e-88	3	MRPL18
FSD1	4.19e-91	0.0591718	0.631	0.555	8.39e-88	3	FSD1
C20orf27	2.2e-90	0.110068	0.712	0.654	4.4e-87	3	C20orf27
DERA	5.59e-90	0.108968	0.688	0.595	1.12e-86	3	DERA
ADRM1	1.25e-89	0.097996	0.921	0.876	2.51e-86	3	ADRM1
NDUFA9	2.42e-89	0.113903	0.635	0.525	4.85e-86	3	NDUFA9
ABCC3	6.4e-88	0.0554003	0.616	0.517	1.28e-84	3	ABCC3
ATP1B3	6.72e-87	0.0961861	0.918	0.892	1.34e-83	3	ATP1B3
TMEM237	2.12e-86	0.0601579	0.652	0.525	4.23e-83	3	TMEM237
CNRIP1	1.17e-85	0.0701076	0.52	0.418	2.35e-82	3	CNRIP1
ANGPTL4	7.5e-85	0.0818568	0.718	0.584	1.5e-81	3	ANGPTL4
CD701	3.93e-84	0.132483	0.776	0.752	7.86e-81	3	CD70
UCHL31	7.61e-84	0.101772	0.903	0.843	1.52e-80	3	UCHL3
COPS5	1.33e-83	0.124023	0.76	0.731	2.66e-80	3	COPS5
NUCB2	2.6e-83	0.0624467	0.851	0.779	5.2e-80	3	NUCB2
CLMP	5.15e-83	0.0515065	0.507	0.401	1.03e-79	3	CLMP
NIT2	5.99e-83	0.102	0.732	0.665	1.2e-79	3	NIT2
RHOF1	2.76e-82	0.113082	0.848	0.819	5.52e-79	3	RHOF
GNPNAT1	4.96e-82	0.113135	0.599	0.527	9.92e-79	3	GNPNAT1
DPM1	6.26e-81	0.0918988	0.527	0.396	1.25e-77	3	DPM1
FAM207A	7.56e-81	0.0936621	0.79	0.733	1.51e-77	3	FAM207A
COPS3	8.07e-80	0.113524	0.659	0.589	1.61e-76	3	COPS3
SNRPA1	1.75e-79	0.104834	0.723	0.643	3.51e-76	3	SNRPA1
ATP5G31	1.27e-77	0.0682929	0.998	0.992	2.55e-74	3	ATP5G3
DNAJA1	1.41e-77	0.0844461	0.801	0.683	2.81e-74	3	DNAJA1
DTYMK	1.33e-76	0.0934139	0.821	0.799	2.66e-73	3	DTYMK
DNAJC2	2.55e-75	0.097959	0.648	0.566	5.11e-72	3	DNAJC2
PRDX4	3.02e-74	0.0863014	0.982	0.949	6.05e-71	3	PRDX4
EPB41L2	3.48e-74	0.0918181	0.784	0.706	6.95e-71	3	EPB41L2
SNHG15	2.65e-72	0.123036	0.658	0.602	5.3e-69	3	SNHG15
SUCLG1	4.73e-72	0.0960212	0.699	0.601	9.46e-69	3	SUCLG1
APBB1IP	5.1e-72	0.0689625	0.421	0.311	1.02e-68	3	APBB1IP
PSMG1	1.63e-71	0.117348	0.651	0.602	3.25e-68	3	PSMG1
AHSA1	2.86e-71	0.0925228	0.78	0.748	5.72e-68	3	AHSA1
SSBP4	5.94e-71	0.0626417	0.76	0.71	1.19e-67	3	SSBP4
TMEM18	2.08e-70	0.101204	0.719	0.662	4.15e-67	3	TMEM18
SBDS	1.02e-69	0.0912002	0.883	0.828	2.05e-66	3	SBDS
TYMS	3.47e-69	0.0748443	0.709	0.669	6.94e-66	3	TYMS
ESF1	5.06e-69	0.0565426	0.618	0.519	1.01e-65	3	ESF1
PDLIM41	7.76e-69	0.0902941	0.977	0.96	1.55e-65	3	PDLIM4
CDC42EP3	1.72e-67	0.0849776	0.722	0.627	3.44e-64	3	CDC42EP3
TUBB2A1	3.11e-67	0.0909734	0.847	0.807	6.21e-64	3	TUBB2A
NUDT1	3.21e-67	0.0921696	0.754	0.713	6.42e-64	3	NUDT1
LMCD1	1.04e-66	0.0997606	0.651	0.587	2.08e-63	3	LMCD1
NDUFB3	2.79e-66	0.0818005	0.958	0.925	5.59e-63	3	NDUFB3
RP11-445F12.1	5.83e-66	0.152191	0.645	0.634	1.17e-62	3	RP11-445F12.1
MCFD2	2.26e-65	0.0821016	0.84	0.782	4.52e-62	3	MCFD2
GFRA11	4.45e-65	0.0857601	0.791	0.743	8.89e-62	3	GFRA1
ACAT2	1.96e-64	0.123091	0.576	0.521	3.91e-61	3	ACAT2
IER2	5.7e-64	0.0809616	0.677	0.613	1.14e-60	3	IER2
TGS1	1.35e-63	0.0891234	0.708	0.643	2.7e-60	3	TGS1
DEK	3.99e-63	0.0617768	0.863	0.803	7.98e-60	3	DEK
MRPL2	6.38e-63	0.11786	0.662	0.622	1.28e-59	3	MRPL2
FAM216A	9.44e-63	0.101835	0.569	0.508	1.89e-59	3	FAM216A
RTCA	1.26e-62	0.0766582	0.752	0.684	2.52e-59	3	RTCA
PPP1R15A	2.51e-62	0.0949536	0.764	0.715	5.02e-59	3	PPP1R15A
SFN	8.23e-62	0.157745	0.606	0.627	1.65e-58	3	SFN
DUSP1	1.13e-61	0.0863511	0.829	0.729	2.26e-58	3	DUSP1
INSIG1	1.66e-61	0.0661994	0.619	0.541	3.32e-58	3	INSIG1
GGCT	1.94e-61	0.0977635	0.672	0.619	3.89e-58	3	GGCT
CENPH	2.5e-61	0.0781629	0.57	0.523	5.01e-58	3	CENPH
NXT1	3.31e-61	0.0958163	0.778	0.74	6.62e-58	3	NXT1
EIF2S1	6.77e-61	0.0752821	0.623	0.515	1.35e-57	3	EIF2S1
DDX39A	6.94e-61	0.130027	0.56	0.499	1.39e-57	3	DDX39A
TRMT10C	7.51e-61	0.0868128	0.759	0.71	1.5e-57	3	TRMT10C
PTGR1	9.23e-61	0.097263	0.752	0.69	1.85e-57	3	PTGR1
PLAU2	9.63e-61	0.081915	0.971	0.962	1.93e-57	3	PLAU
GPAT3	1.27e-60	0.0558871	0.327	0.359	2.53e-57	3	GPAT3
COA4	1.44e-60	0.0813288	0.915	0.883	2.88e-57	3	COA4
PBDC1	5.24e-60	0.0856516	0.613	0.53	1.05e-56	3	PBDC1
PCMT1	1.16e-58	0.0775108	0.798	0.735	2.31e-55	3	PCMT1
MRPL13	2.1e-58	0.101551	0.589	0.5	4.19e-55	3	MRPL13
NFKBIA	6.69e-58	0.100507	0.92	0.894	1.34e-54	3	NFKBIA
GDF151	8.64e-58	0.143623	0.91	0.905	1.73e-54	3	GDF15
NOP14	1.6e-57	0.0770639	0.589	0.496	3.21e-54	3	NOP14
CENPN	4.35e-57	0.0818574	0.525	0.462	8.69e-54	3	CENPN
TMEM54	5.45e-57	0.0514675	0.846	0.773	1.09e-53	3	TMEM54
PKIB1	1.52e-56	0.0987184	0.771	0.717	3.04e-53	3	PKIB
MRPS61	2.85e-56	0.0824097	0.911	0.872	5.7e-53	3	MRPS6
GABPB1-AS11	3.13e-56	0.0631386	0.686	0.622	6.25e-53	3	GABPB1-AS1
NASP	3.46e-56	0.0783685	0.597	0.489	6.93e-53	3	NASP
RAC2	4.64e-56	0.0766689	0.755	0.735	9.28e-53	3	RAC2
HMOX2	1.52e-55	0.0835649	0.734	0.69	3.05e-52	3	HMOX2
MRPL1	2e-55	0.0922351	0.68	0.638	4.01e-52	3	MRPL1
SLC3A2	2.56e-55	0.129907	0.61	0.558	5.12e-52	3	SLC3A2
ID3	3.32e-54	0.0808167	0.934	0.898	6.64e-51	3	ID3
C8orf59	1.77e-53	0.0799869	0.857	0.815	3.54e-50	3	C8orf59
LAMB3	1.88e-53	0.0855595	0.526	0.472	3.76e-50	3	LAMB3
SNX7	2.55e-53	0.0551752	0.593	0.515	5.11e-50	3	SNX7
ARSJ	4.92e-53	0.0697806	0.728	0.67	9.85e-50	3	ARSJ
PNO1	1.14e-51	0.0665895	0.561	0.458	2.28e-48	3	PNO1
PDCL3	2.03e-51	0.094884	0.647	0.599	4.06e-48	3	PDCL3
ID2	2.26e-51	0.0852475	0.451	0.343	4.52e-48	3	ID2
CD91	6.24e-50	0.071344	0.923	0.877	1.25e-46	3	CD9
CHORDC1	9.56e-50	0.0719156	0.55	0.435	1.91e-46	3	CHORDC1
NDUFAB1	4.28e-49	0.051472	0.872	0.833	8.56e-46	3	NDUFAB1
SKA2	3.19e-48	0.0533729	0.63	0.547	6.37e-45	3	SKA2
C12orf45	3.92e-48	0.0849741	0.57	0.472	7.83e-45	3	C12orf45
EMG1	4.45e-48	0.087399	0.576	0.48	8.91e-45	3	EMG1
FHL21	1.15e-46	0.0794974	0.984	0.958	2.3e-43	3	FHL2
EIF2B3	1.17e-46	0.0754562	0.561	0.495	2.34e-43	3	EIF2B3
HCFC1R11	1.73e-46	0.0771724	0.857	0.806	3.46e-43	3	HCFC1R1
PSMB9	2.95e-46	0.140881	0.586	0.577	5.91e-43	3	PSMB9
PSME2	3.29e-46	0.0658921	0.888	0.816	6.58e-43	3	PSME2
SEMA7A	3.63e-46	0.0571703	0.715	0.672	7.25e-43	3	SEMA7A
ECH1	7.94e-46	0.0789586	0.757	0.707	1.59e-42	3	ECH1
PEG101	4.19e-45	0.0575033	0.683	0.605	8.39e-42	3	PEG10
TUBG1	4.97e-45	0.081383	0.634	0.576	9.93e-42	3	TUBG1
SNW1	5.82e-45	0.0811076	0.541	0.424	1.16e-41	3	SNW1
ANXA1	1.12e-44	0.0669174	0.782	0.721	2.25e-41	3	ANXA1
EXOSC8	7.07e-44	0.0825057	0.457	0.371	1.41e-40	3	EXOSC8
POLR3K	8.06e-44	0.0699453	0.703	0.652	1.61e-40	3	POLR3K
MYC	9.35e-44	0.0836127	0.588	0.503	1.87e-40	3	MYC
RGS3	1.62e-43	0.0566032	0.839	0.782	3.24e-40	3	RGS3
HOTAIRM1	1.67e-43	0.111694	0.53	0.472	3.35e-40	3	HOTAIRM1
LHX11	4.72e-43	0.114054	0.816	0.831	9.44e-40	3	LHX1
DESI1	7.56e-43	0.0709005	0.783	0.765	1.51e-39	3	DESI1
DRG1	8.8e-42	0.0776877	0.661	0.602	1.76e-38	3	DRG1
CDC5L	3.61e-41	0.0791704	0.619	0.564	7.21e-38	3	CDC5L
COMMD4	7.43e-41	0.0861485	0.738	0.739	1.49e-37	3	COMMD4
MTX1	1.27e-40	0.0836535	0.722	0.708	2.54e-37	3	MTX1
CD68	2.12e-40	0.0811759	0.7	0.706	4.24e-37	3	CD68
DUSP14	1.17e-39	0.0878216	0.646	0.61	2.34e-36	3	DUSP14
LPP	1.2e-38	0.0553124	0.916	0.847	2.4e-35	3	LPP
EBP	1.23e-38	0.0901659	0.66	0.639	2.45e-35	3	EBP
IL6	2.29e-38	0.0698741	0.897	0.853	4.58e-35	3	IL6
AK6	7.42e-38	0.0718711	0.633	0.566	1.48e-34	3	AK6
GMPPB	1.1e-37	0.0865721	0.641	0.618	2.21e-34	3	GMPPB
PSMC2	3.11e-37	0.0731257	0.531	0.425	6.23e-34	3	PSMC2
RNASEH2C	9.7e-37	0.0577677	0.873	0.823	1.94e-33	3	RNASEH2C
MAGOH	1.09e-36	0.0806804	0.578	0.503	2.19e-33	3	MAGOH
PPARG	4.77e-36	0.0652724	0.555	0.553	9.54e-33	3	PPARG
CTSL	6.64e-36	0.0726998	0.746	0.728	1.33e-32	3	CTSL
MRPL17	1.32e-35	0.0550016	0.911	0.883	2.64e-32	3	MRPL17
HYI	9.7e-34	0.0635036	0.85	0.813	1.94e-30	3	HYI
TIMM8A	2.3e-33	0.0653916	0.689	0.658	4.6e-30	3	TIMM8A
BLVRB	5.58e-33	0.057075	0.808	0.764	1.12e-29	3	BLVRB
SMC3	5.94e-33	0.0689427	0.624	0.578	1.19e-29	3	SMC3
TLE4	1.77e-32	0.0525806	0.519	0.456	3.55e-29	3	TLE4
APITD1	3.22e-31	0.0520665	0.462	0.398	6.43e-28	3	APITD1
TWISTNB	3.9e-31	0.0713227	0.705	0.646	7.8e-28	3	TWISTNB
IL11	9.95e-30	0.0968364	0.685	0.664	1.99e-26	3	IL11
HCCS	3.38e-29	0.0648453	0.663	0.625	6.76e-26	3	HCCS
ELOVL6	3.42e-29	0.0740352	0.458	0.389	6.83e-26	3	ELOVL6
SERTAD1	1.81e-28	0.0756977	0.616	0.593	3.62e-25	3	SERTAD1
WDR61	2.5e-28	0.0687591	0.627	0.579	4.99e-25	3	WDR61
FAM162A	5.85e-27	0.05294	0.889	0.845	1.17e-23	3	FAM162A
PRELID3B	2e-26	0.0692338	0.659	0.633	4e-23	3	PRELID3B
TUBB2B1	2.06e-26	0.0654548	0.747	0.73	4.12e-23	3	TUBB2B
RPA3	6.25e-26	0.0700478	0.628	0.579	1.25e-22	3	RPA3
FH	1.32e-24	0.132378	0.55	0.55	2.64e-21	3	FH
PNP	5.32e-24	0.0844701	0.564	0.559	1.06e-20	3	PNP
CBR1	4.47e-23	0.0638516	0.736	0.732	8.93e-20	3	CBR1
MYO5B	1.26e-22	0.0870232	0.487	0.443	2.51e-19	3	MYO5B
SQRDL	1.03e-21	0.0712054	0.538	0.489	2.05e-18	3	SQRDL
CD40	4.31e-21	0.0952784	0.629	0.664	8.63e-18	3	CD40
KITLG	5.01e-21	0.0679294	0.446	0.544	1e-17	3	KITLG
DUSP4	6.18e-21	0.0532816	0.712	0.674	1.24e-17	3	DUSP4
NME4	3.06e-19	0.050213	0.976	0.97	6.12e-16	3	NME4
GNL2	2.41e-18	0.0609064	0.412	0.274	4.81e-15	3	GNL2
ITGA6	3.76e-18	0.0781229	0.543	0.539	7.52e-15	3	ITGA6
GOSR2	3.26e-16	0.0558653	0.721	0.718	6.52e-13	3	GOSR2
CCNH	6.55e-15	0.0707552	0.626	0.624	1.31e-11	3	CCNH
UPP1	8.2e-15	0.0676976	0.691	0.713	1.64e-11	3	UPP1
FUCA2	2.2e-14	0.0709373	0.521	0.485	4.4e-11	3	FUCA2
CENPW	6.28e-14	0.0695741	0.583	0.571	1.26e-10	3	CENPW
RARRES3	7.06e-14	0.0581204	0.356	0.391	1.41e-10	3	RARRES3
TK1	3.31e-13	0.0659418	0.504	0.529	6.62e-10	3	TK1
TATDN1	3.76e-13	0.0530329	0.554	0.507	7.52e-10	3	TATDN1
S100A3	2.55e-12	0.0514263	0.426	0.508	5.09e-09	3	S100A3
PHF19	1.22e-11	0.0741307	0.656	0.67	2.44e-08	3	PHF19
CBR3	2.54e-11	0.0788022	0.551	0.55	5.08e-08	3	CBR3
POLR3G	8.61e-11	0.0608635	0.488	0.457	1.72e-07	3	POLR3G
DCAF13	8.78e-11	0.0629298	0.47	0.406	1.76e-07	3	DCAF13
EXOSC3	2.55e-09	0.0631247	0.507	0.468	5.11e-06	3	EXOSC3
TMEM233	9.31e-09	0.0642694	0.504	0.518	1.86e-05	3	TMEM233
RNASEH2A	1.48e-08	0.0884978	0.525	0.529	2.97e-05	3	RNASEH2A
CCDC86	5e-08	0.088128	0.423	0.384	0.0001	3	CCDC86
DNTTIP2	2.75e-07	0.0557754	0.458	0.396	0.00055075	3	DNTTIP2
GRB14	3.64e-07	0.0581793	0.42	0.374	0.000727403	3	GRB14
CDKN3	5.4e-07	0.0532086	0.502	0.501	0.00108048	3	CDKN3
SMOX	7.55e-07	0.0720408	0.571	0.587	0.00150956	3	SMOX
HMOX1	9.44e-06	0.154114	0.434	0.423	0.0188745	3	HMOX1
AREG	0.000123202	0.0507324	0.393	0.403	0.246403	3	AREG
JUNB	0.000561348	0.0669127	0.579	0.587	1	3	JUNB
PPIL1	0.00182689	0.0597101	0.401	0.411	1	3	PPIL1
MALL	0.0027585	0.0734624	0.455	0.511	1	3	MALL
AIFM2	0.00557698	0.0640713	0.541	0.609	1	3	AIFM2
CCL2	0	2.00216	0.914	0.696	0	4	CCL2
SERPINE1	0	2.00087	1	0.894	0	4	SERPINE1
TIMP3	0	1.76964	0.946	0.749	0	4	TIMP3
ACTA2	0	1.65794	0.939	0.822	0	4	ACTA2
COL1A2	0	1.63624	0.974	0.743	0	4	COL1A2
NPPB1	0	1.47961	0.931	0.925	0	4	NPPB
CTGF	0	1.46711	0.996	0.923	0	4	CTGF
IL1B	0	1.41308	0.966	0.794	0	4	IL1B
TIMP1	0	1.36645	0.994	0.979	0	4	TIMP1
PLOD2	0	1.29773	0.972	0.715	0	4	PLOD2
ACTG2	0	1.26561	0.883	0.737	0	4	ACTG2
THY1	0	1.22673	0.927	0.699	0	4	THY1
COL1A11	0	1.19554	0.981	0.953	0	4	COL1A1
RGS4	0	1.15947	0.914	0.727	0	4	RGS4
COL3A1	0	1.15296	0.871	0.708	0	4	COL3A1
POSTN	0	1.0226	0.776	0.699	0	4	POSTN
TPM2	0	1.0164	1	0.997	0	4	TPM2
FLT1	0	0.941807	0.9	0.695	0	4	FLT1
INHBA1	0	0.912911	0.991	0.954	0	4	INHBA
ADAM19	0	0.898787	0.958	0.816	0	4	ADAM19
SELM	0	0.893943	0.992	0.945	0	4	SELM
KCNG1	0	0.871767	0.94	0.729	0	4	KCNG1
PAPPA1	0	0.813805	0.933	0.921	0	4	PAPPA
GREM1	0	0.794558	0.871	0.64	0	4	GREM1
PRDX6	0	0.788804	0.989	0.961	0	4	PRDX6
MYL91	0	0.782427	0.999	0.979	0	4	MYL9
COL6A3	0	0.779662	0.93	0.77	0	4	COL6A3
TGM21	0	0.77272	0.951	0.84	0	4	TGM2
COL6A1	0	0.755801	0.934	0.793	0	4	COL6A1
LARP6	0	0.749324	0.969	0.879	0	4	LARP6
SEPW1	0	0.713911	0.993	0.967	0	4	SEPW1
CALD11	0	0.693482	1	0.999	0	4	CALD1
MAP1A	0	0.685266	0.855	0.65	0	4	MAP1A
GSTO11	0	0.679304	0.981	0.906	0	4	GSTO1
ANKRD11	0	0.654857	0.978	0.981	0	4	ANKRD1
H2AFJ	0	0.649938	0.951	0.876	0	4	H2AFJ
IGFBP4	0	0.636088	0.922	0.688	0	4	IGFBP4
S100A4	0	0.627611	0.914	0.736	0	4	S100A4
KCTD20	0	0.618279	0.909	0.74	0	4	KCTD20
HAPLN1	0	0.613798	0.835	0.691	0	4	HAPLN1
DKK11	0	0.609404	0.84	0.784	0	4	DKK1
ENC1	0	0.60814	0.894	0.768	0	4	ENC1
SCG5	0	0.606835	0.694	0.686	0	4	SCG5
SERPINE2	0	0.604588	0.943	0.828	0	4	SERPINE2
COL6A2	0	0.603729	0.873	0.767	0	4	COL6A2
ISG151	0	0.602726	0.979	0.965	0	4	ISG15
RCN3	0	0.600903	0.912	0.718	0	4	RCN3
PLAT1	0	0.597775	0.975	0.957	0	4	PLAT
TAGLN1	0	0.594871	1	0.996	0	4	TAGLN
CCDC80	0	0.593581	0.888	0.631	0	4	CCDC80
FXYD51	0	0.586718	0.989	0.947	0	4	FXYD5
NDUFAB11	0	0.583812	0.962	0.827	0	4	NDUFAB1
SERPINH1	0	0.57919	0.946	0.822	0	4	SERPINH1
MMP23B	0	0.573284	0.868	0.627	0	4	MMP23B
LINC00152	0	0.563949	0.986	0.959	0	4	LINC00152
NT5E	0	0.559675	0.911	0.801	0	4	NT5E
ITGA2	0	0.553455	0.886	0.802	0	4	ITGA2
CDH11	0	0.549078	0.817	0.672	0	4	CDH11
BGN	0	0.541023	0.862	0.711	0	4	BGN
LOX	0	0.523618	0.882	0.826	0	4	LOX
SNHG18	0	0.522346	0.838	0.771	0	4	SNHG18
RP11-14N7.2	0	0.521303	0.948	0.815	0	4	RP11-14N7.2
AEBP1	0	0.506222	0.899	0.759	0	4	AEBP1
TFPI21	0	0.502669	0.883	0.698	0	4	TFPI2
PODXL	0	0.500684	0.885	0.728	0	4	PODXL
SPOCD1	0	0.499697	0.872	0.784	0	4	SPOCD1
DAB2	0	0.493975	0.935	0.848	0	4	DAB2
PHLDA21	0	0.488917	0.984	0.947	0	4	PHLDA2
COL5A11	0	0.484782	0.899	0.881	0	4	COL5A1
ID31	0	0.482014	0.962	0.899	0	4	ID3
FSTL3	0	0.479768	0.939	0.86	0	4	FSTL3
MYDGF1	0	0.479746	0.995	0.973	0	4	MYDGF
HSPB1	0	0.478467	0.989	0.986	0	4	HSPB1
RGCC	0	0.473374	0.83	0.706	0	4	RGCC
MIR4435-2HG	0	0.471955	0.986	0.977	0	4	MIR4435-2HG
CHCHD10	0	0.468475	0.928	0.807	0	4	CHCHD10
SLC20A1	0	0.46204	0.843	0.698	0	4	SLC20A1
TNFRSF12A1	0	0.461197	0.992	0.966	0	4	TNFRSF12A
COPZ2	0	0.457249	0.867	0.707	0	4	COPZ2
SPARC1	0	0.457092	0.997	0.999	0	4	SPARC
PLAUR1	0	0.456205	0.959	0.833	0	4	PLAUR
FGF11	0	0.455178	0.903	0.767	0	4	FGF1
PCDH10	0	0.453122	0.643	0.642	0	4	PCDH10
LAYN	0	0.44872	0.89	0.576	0	4	LAYN
IGFBP72	0	0.442958	0.999	1	0	4	IGFBP7
DIRAS3	0	0.437133	0.857	0.765	0	4	DIRAS3
TUBB61	0	0.431121	0.96	0.852	0	4	TUBB6
MYO10	0	0.430301	0.91	0.731	0	4	MYO10
FKBP11	0	0.423436	0.882	0.68	0	4	FKBP11
CLEC11A	0	0.422641	0.882	0.644	0	4	CLEC11A
SRM1	0	0.420237	0.984	0.937	0	4	SRM
WNT5B	0	0.419887	0.701	0.431	0	4	WNT5B
POU2F21	0	0.412309	0.868	0.846	0	4	POU2F2
GYPC1	0	0.410624	0.834	0.661	0	4	GYPC
HOXC8	0	0.408559	0.703	0.524	0	4	HOXC8
SORBS21	0	0.407086	0.873	0.777	0	4	SORBS2
SSR31	0	0.406375	0.996	0.968	0	4	SSR3
SULF1	0	0.404612	0.779	0.673	0	4	SULF1
STC21	0	0.403185	0.902	0.768	0	4	STC2
HACD11	0	0.397023	0.892	0.84	0	4	HACD1
CEBPB1	0	0.395473	0.919	0.797	0	4	CEBPB
NUCB21	0	0.394982	0.902	0.78	0	4	NUCB2
KDELR3	0	0.385716	0.873	0.816	0	4	KDELR3
FRMD6	0	0.383647	0.949	0.843	0	4	FRMD6
CREB3L1	0	0.383253	0.787	0.723	0	4	CREB3L1
ADAMTS61	0	0.365567	0.936	0.79	0	4	ADAMTS6
BDNF	0	0.35896	0.892	0.774	0	4	BDNF
C4orf3	0	0.358024	0.983	0.974	0	4	C4orf3
RAB31	0	0.350216	0.917	0.837	0	4	RAB31
LMO7	0	0.34884	0.84	0.777	0	4	LMO7
LGALS1	0	0.345547	1	1	0	4	LGALS1
PRRX1	0	0.335875	0.845	0.718	0	4	PRRX1
EIF4EBP11	0	0.335655	0.965	0.885	0	4	EIF4EBP1
SPHK11	0	0.332487	0.947	0.867	0	4	SPHK1
CHIC2	0	0.329702	0.879	0.812	0	4	CHIC2
SMURF2	0	0.329399	0.913	0.778	0	4	SMURF2
CENPV1	0	0.325752	0.912	0.78	0	4	CENPV
C16orf741	0	0.322601	0.864	0.698	0	4	C16orf74
PLP21	0	0.322305	0.974	0.934	0	4	PLP2
COPRS	0	0.316452	0.947	0.879	0	4	COPRS
NRP2	0	0.316167	0.828	0.651	0	4	NRP2
NT5DC2	0	0.315934	0.951	0.893	0	4	NT5DC2
LTBP1	0	0.315214	0.842	0.778	0	4	LTBP1
FERMT2	0	0.314761	0.938	0.821	0	4	FERMT2
PDGFA	0	0.314544	0.86	0.681	0	4	PDGFA
ALDOA1	0	0.308855	0.996	0.993	0	4	ALDOA
FABP4	0	0.308233	0.789	0.733	0	4	FABP4
VAMP5	0	0.306075	0.893	0.671	0	4	VAMP5
MDK1	0	0.303928	0.895	0.785	0	4	MDK
MFAP21	0	0.302598	0.931	0.897	0	4	MFAP2
PRKCDBP1	0	0.300409	0.914	0.755	0	4	PRKCDBP
MIR4458HG	0	0.297252	0.648	0.455	0	4	MIR4458HG
HAS2	0	0.293433	0.797	0.689	0	4	HAS2
PRELID11	0	0.291694	0.993	0.975	0	4	PRELID1
WNT5A	0	0.290421	0.853	0.552	0	4	WNT5A
CARMN	0	0.282287	0.728	0.665	0	4	CARMN
ACTB1	0	0.274779	1	1	0	4	ACTB
MYL6	0	0.272876	1	1	0	4	MYL6
FST	0	0.260481	0.813	0.685	0	4	FST
ESM1	0	0.24307	0.817	0.705	0	4	ESM1
NR2F1-AS1	0	0.240855	0.751	0.657	0	4	NR2F1-AS1
PITX1	0	0.235175	0.734	0.644	0	4	PITX1
ARHGDIB	0	0.215188	0.748	0.54	0	4	ARHGDIB
TWIST21	0	0.207881	0.808	0.737	0	4	TWIST2
AVEN	0	0.205182	0.848	0.722	0	4	AVEN
MFAP5	0	0.200212	0.771	0.741	0	4	MFAP5
OSTF1	0	0.192947	0.862	0.582	0	4	OSTF1
FIBIN	0	0.191419	0.782	0.679	0	4	FIBIN
CCL5	0	0.186065	0.152	0.389	0	4	CCL5
NRXN3	0	0.153704	0.654	0.296	0	4	NRXN3
COX7A1	0	0.148405	0.662	0.643	0	4	COX7A1
SGK223	0	0.140262	0.779	0.48	0	4	SGK223
KHDRBS3	0	0.122326	0.815	0.528	0	4	KHDRBS3
BHLHE40	0	0.120061	0.809	0.575	0	4	BHLHE40
TYMP	0	0.107795	0.832	0.739	0	4	TYMP
IRX3	0	0.0934792	0.743	0.468	0	4	IRX3
RAB33A	0	0.0867131	0.731	0.68	0	4	RAB33A
PARD6G	0	0.0863735	0.743	0.589	0	4	PARD6G
PVRL4	0	0.083483	0.732	0.593	0	4	PVRL4
FBXO32	0	0.0787278	0.78	0.645	0	4	FBXO32
MSX1	0	0.0781916	0.749	0.641	0	4	MSX1
FXYD1	0	0.0771698	0.722	0.596	0	4	FXYD1
SOX11	0	0.0770861	0.811	0.634	0	4	SOX11
SGCD	0	0.0661101	0.676	0.633	0	4	SGCD
STXBP6	0	0.055714	0.218	0.46	0	4	STXBP6
LINC01483	0	0.0550241	0.74	0.715	0	4	LINC01483
CCDC81	0	0.0549818	0.207	0.439	0	4	CCDC81
CTHRC1	0	0.053523	0.281	0.587	0	4	CTHRC1
NES	0	0.0522706	0.737	0.474	0	4	NES
ID4	0	0.0520491	0.724	0.355	0	4	ID4
C10orf10	0	0.0512624	0.733	0.568	0	4	C10orf10
CNN1	5.47e-304	0.325695	0.682	0.524	1.09e-300	4	CNN1
ECSCR	7.07e-304	0.112205	0.747	0.7	1.41e-300	4	ECSCR
MAGEH11	3.9e-302	0.0762104	0.806	0.705	7.79e-299	4	MAGEH1
NDUFA12	1.27e-295	0.277946	0.922	0.843	2.55e-292	4	NDUFA12
NME41	5.08e-293	0.236914	0.981	0.97	1.02e-289	4	NME4
ARPC1A1	8.36e-293	0.250701	0.969	0.918	1.67e-289	4	ARPC1A
GADD45A	4.75e-279	0.348639	0.889	0.836	9.51e-276	4	GADD45A
MCFD21	9.45e-278	0.250109	0.903	0.781	1.89e-274	4	MCFD2
SEC11C	2.31e-277	0.274645	0.933	0.908	4.61e-274	4	SEC11C
ARHGAP221	5.28e-276	0.342619	0.737	0.711	1.06e-272	4	ARHGAP22
HOXB51	1.09e-268	0.0506696	0.826	0.723	2.18e-265	4	HOXB5
RP11-390P2.4	1.65e-268	0.170911	0.779	0.756	3.3e-265	4	RP11-390P2.4
RTTN	1.36e-266	0.115634	0.666	0.632	2.71e-263	4	RTTN
A1BG2	2.28e-263	0.247785	0.914	0.909	4.57e-260	4	A1BG
AC013461.1	1.1e-260	0.279064	0.743	0.574	2.19e-257	4	AC013461.1
S100A111	8.14e-259	0.198878	1	1	1.63e-255	4	S100A11
KIAA1462	1.02e-258	0.303011	0.643	0.494	2.04e-255	4	KIAA1462
ICAM11	3.79e-258	0.172325	0.828	0.691	7.58e-255	4	ICAM1
NLRP1	5.06e-256	0.42656	0.742	0.762	1.01e-252	4	NLRP1
JUNB1	7.32e-254	0.097893	0.797	0.565	1.46e-250	4	JUNB
RRAS1	5.07e-252	0.234405	0.958	0.949	1.01e-248	4	RRAS
NUPR1	3.17e-249	0.0719806	0.184	0.343	6.34e-246	4	NUPR1
TMEM173	2.46e-247	0.11072	0.744	0.645	4.92e-244	4	TMEM173
SRPX2	2.52e-244	0.176136	0.608	0.506	5.03e-241	4	SRPX2
ANXA8L1	1.41e-242	0.200226	0.53	0.333	2.82e-239	4	ANXA8L1
RSU11	1.33e-241	0.245466	0.894	0.816	2.66e-238	4	RSU1
MLLT111	3.98e-240	0.272744	0.92	0.87	7.96e-237	4	MLLT11
ANXA6	9.9e-239	0.25662	0.856	0.733	1.98e-235	4	ANXA6
CDKN2B	8.03e-235	0.375602	0.804	0.766	1.61e-231	4	CDKN2B
FOXD1	2.06e-234	0.277719	0.739	0.646	4.12e-231	4	FOXD1
BAMBI1	1.41e-225	0.10817	0.796	0.607	2.81e-222	4	BAMBI
DSC3	5.09e-222	0.370985	0.644	0.684	1.02e-218	4	DSC3
CFL21	1.25e-221	0.228651	0.819	0.667	2.49e-218	4	CFL2
LMO4	4.79e-221	0.288504	0.861	0.756	9.58e-218	4	LMO4
ULBP2	6.26e-219	0.176484	0.6	0.444	1.25e-215	4	ULBP2
MEG31	2.46e-216	0.200761	0.972	0.963	4.92e-213	4	MEG3
ADI1	3.83e-216	0.241341	0.887	0.839	7.66e-213	4	ADI1
CRYAB	8.51e-216	0.432129	0.639	0.556	1.7e-212	4	CRYAB
ST3GAL51	7.86e-214	0.200958	0.741	0.693	1.57e-210	4	ST3GAL5
CCBE11	6.77e-209	0.170716	0.734	0.584	1.35e-205	4	CCBE1
ENG	2.07e-208	0.269111	0.588	0.415	4.14e-205	4	ENG
PDLIM3	1.62e-207	0.390462	0.602	0.594	3.23e-204	4	PDLIM3
HERPUD1	5.68e-207	0.268061	0.911	0.804	1.14e-203	4	HERPUD1
CTD-2015H6.3	1.1e-205	0.102158	0.608	0.464	2.2e-202	4	CTD-2015H6.3
ZNF6771	1.79e-204	0.0511233	0.643	0.43	3.58e-201	4	ZNF677
SERTAD11	5.07e-203	0.129714	0.74	0.583	1.01e-199	4	SERTAD1
IGFBP61	1.52e-201	0.236835	0.919	0.853	3.04e-198	4	IGFBP6
CYR611	1.68e-200	0.286018	0.988	0.95	3.36e-197	4	CYR61
TMEM171	2.13e-200	0.118682	0.606	0.493	4.26e-197	4	TMEM171
YBX31	3.11e-200	0.23073	0.939	0.832	6.21e-197	4	YBX3
POPDC3	5.46e-200	0.0952713	0.52	0.324	1.09e-196	4	POPDC3
PMP22	2.95e-199	0.103808	0.562	0.422	5.89e-196	4	PMP22
EMC7	2.74e-197	0.225016	0.936	0.886	5.47e-194	4	EMC7
RGS101	3.52e-197	0.271473	0.951	0.906	7.04e-194	4	RGS10
RALA1	2.49e-196	0.324175	0.965	0.936	4.98e-193	4	RALA
ZFP36L2	5.69e-194	0.0613943	0.701	0.584	1.14e-190	4	ZFP36L2
SBDS1	5.82e-194	0.229007	0.923	0.829	1.16e-190	4	SBDS
TMEM158	7.47e-191	0.31381	0.857	0.837	1.49e-187	4	TMEM158
GADD45B	1.23e-185	0.131889	0.606	0.405	2.45e-182	4	GADD45B
IFI27	1.28e-185	0.0581157	0.161	0.313	2.56e-182	4	IFI27
CHST2	1.97e-185	0.0523938	0.328	0.561	3.93e-182	4	CHST2
UFD1L	3.46e-185	0.223159	0.912	0.862	6.92e-182	4	UFD1L
TGFBI1	1.6e-179	0.282922	0.991	0.981	3.19e-176	4	TGFBI
PSMD81	3.81e-177	0.202379	0.963	0.929	7.62e-174	4	PSMD8
DDR2	1.01e-176	0.36559	0.611	0.659	2.01e-173	4	DDR2
TSPO1	1.87e-174	0.168219	0.998	0.999	3.73e-171	4	TSPO
HHIP-AS11	3.4e-174	0.348394	0.77	0.791	6.79e-171	4	HHIP-AS1
HMGA21	6.83e-174	0.228862	0.925	0.848	1.37e-170	4	HMGA2
DHRS31	8.26e-173	0.271615	0.772	0.795	1.65e-169	4	DHRS3
CALM2	1.07e-172	0.163209	1	0.998	2.15e-169	4	CALM2
SIGIRR	1.32e-171	0.165105	0.883	0.845	2.63e-168	4	SIGIRR
GLIPR11	1.64e-169	0.206992	0.973	0.961	3.29e-166	4	GLIPR1
MEST	3.91e-169	0.276319	0.698	0.699	7.83e-166	4	MEST
PDZD11	4.18e-169	0.192387	0.902	0.781	8.36e-166	4	PDZD11
PSME21	2.62e-167	0.214837	0.922	0.819	5.24e-164	4	PSME2
ITGA4	4.57e-167	0.0984843	0.529	0.423	9.13e-164	4	ITGA4
LIMA11	1.48e-164	0.186137	0.956	0.906	2.96e-161	4	LIMA1
UACA	4.96e-164	0.219894	0.637	0.482	9.93e-161	4	UACA
CLMP1	9e-163	0.171812	0.557	0.405	1.8e-159	4	CLMP
PFN12	4.89e-162	0.12536	1	1	9.78e-159	4	PFN1
BLVRB1	8.45e-155	0.150697	0.868	0.762	1.69e-151	4	BLVRB
RAD23A1	1.46e-153	0.198685	0.889	0.841	2.93e-150	4	RAD23A
RP4-621F18.2	1.83e-151	0.226975	0.642	0.516	3.65e-148	4	RP4-621F18.2
PNP1	2.4e-150	0.167564	0.683	0.548	4.81e-147	4	PNP
SLC7A5	3.11e-146	0.175912	0.726	0.578	6.23e-143	4	SLC7A5
CALM11	2.73e-145	0.166199	0.995	0.994	5.45e-142	4	CALM1
TNS1	1.38e-144	0.218642	0.664	0.595	2.75e-141	4	TNS1
EIF5A1	1.64e-144	0.205526	0.995	0.984	3.27e-141	4	EIF5A
GMPPB1	1.12e-143	0.0550028	0.791	0.605	2.24e-140	4	GMPPB
FLI1	8.43e-143	0.0865067	0.345	0.578	1.69e-139	4	FLI1
PRDX41	8.86e-143	0.219054	0.957	0.954	1.77e-139	4	PRDX4
PLPP4	9.55e-143	0.182499	0.819	0.744	1.91e-139	4	PLPP4
RP11-38L15.2	1.94e-142	0.0636431	0.567	0.488	3.89e-139	4	RP11-38L15.2
SMCO4	2.09e-142	0.126675	0.55	0.42	4.18e-139	4	SMCO4
PTX31	1.31e-139	0.404126	0.674	0.694	2.62e-136	4	PTX3
XRCC4	1.71e-137	0.314059	0.57	0.525	3.41e-134	4	XRCC4
CMSS11	7.27e-137	0.0784772	0.822	0.699	1.45e-133	4	CMSS1
LIF	3.17e-134	0.182442	0.733	0.625	6.35e-131	4	LIF
RNASEH2C1	4.8e-133	0.177587	0.886	0.826	9.6e-130	4	RNASEH2C
DAD1	6.06e-133	0.167207	0.987	0.98	1.21e-129	4	DAD1
CDC42EP31	1.94e-130	0.179265	0.784	0.629	3.88e-127	4	CDC42EP3
CCL20	5.83e-130	0.109047	0.413	0.654	1.17e-126	4	CCL20
VEGFA	8.42e-129	0.144357	0.719	0.56	1.68e-125	4	VEGFA
PLIN21	7.77e-127	0.131082	0.839	0.643	1.55e-123	4	PLIN2
NEXN1	1.21e-126	0.181045	0.914	0.875	2.43e-123	4	NEXN
ANXA11	2.31e-126	0.188467	0.838	0.72	4.62e-123	4	ANXA1
HBEGF1	8.01e-124	0.229159	0.916	0.799	1.6e-120	4	HBEGF
TCEB1	2.02e-123	0.1442	0.972	0.96	4.04e-120	4	TCEB1
H2AFZ1	1.34e-122	0.13637	0.989	0.98	2.68e-119	4	H2AFZ
ABCA11	2.35e-122	0.0949695	0.819	0.792	4.69e-119	4	ABCA1
CEP1701	2.86e-120	0.162611	0.879	0.736	5.73e-117	4	CEP170
WSB2	8.62e-119	0.190073	0.752	0.735	1.72e-115	4	WSB2
SGK1	2.96e-114	0.192594	0.671	0.577	5.93e-111	4	SGK1
MANF1	2.79e-112	0.20243	0.961	0.884	5.58e-109	4	MANF
B2M1	2.96e-112	0.17068	0.997	0.994	5.92e-109	4	B2M
JAG11	3.14e-112	0.060049	0.853	0.697	6.27e-109	4	JAG1
SH3KBP1	2.05e-110	0.127382	0.852	0.661	4.09e-107	4	SH3KBP1
PITX2	5.41e-110	0.299186	0.601	0.643	1.08e-106	4	PITX2
RP11-1398P2.1	2.19e-108	0.0673674	0.28	0.419	4.37e-105	4	RP11-1398P2.1
GDNF1	1.17e-106	0.0782634	0.45	0.708	2.35e-103	4	GDNF
C5orf30	6.83e-105	0.131032	0.558	0.461	1.37e-101	4	C5orf30
MYL12A1	2.08e-104	0.125258	0.999	0.999	4.17e-101	4	MYL12A
RHOJ	1.56e-103	0.178173	0.576	0.538	3.13e-100	4	RHOJ
COA41	4.42e-103	0.146436	0.924	0.885	8.83e-100	4	COA4
SSSCA11	5.36e-103	0.129761	0.805	0.666	1.07e-99	4	SSSCA1
DUSP141	3.99e-101	0.128041	0.721	0.606	7.98e-98	4	DUSP14
AC093673.5	7.57e-101	0.151166	0.776	0.756	1.51e-97	4	AC093673.5
HHIP1	1.56e-100	0.341668	0.628	0.734	3.13e-97	4	HHIP
PFDN21	1.82e-100	0.133601	0.982	0.958	3.63e-97	4	PFDN2
ILK1	1.4e-96	0.155491	0.85	0.808	2.79e-93	4	ILK
RRP7A1	8.03e-94	0.0997133	0.872	0.735	1.61e-90	4	RRP7A
VIM1	1.48e-93	0.208554	1	1	2.96e-90	4	VIM
COPS61	4.07e-93	0.160695	0.884	0.826	8.15e-90	4	COPS6
VEGFC1	1.17e-91	0.162157	0.601	0.506	2.33e-88	4	VEGFC
MYL12B1	1.38e-91	0.113266	0.997	0.999	2.76e-88	4	MYL12B
SYNE1	1.57e-90	0.127505	0.534	0.426	3.14e-87	4	SYNE1
BNIP31	2.96e-89	0.179101	0.942	0.89	5.91e-86	4	BNIP3
ANGPTL41	1.93e-88	0.194031	0.707	0.596	3.85e-85	4	ANGPTL4
UAP1	1.03e-87	0.151155	0.63	0.506	2.06e-84	4	UAP1
RP11-879F14.2	1.37e-86	0.16218	0.558	0.426	2.75e-83	4	RP11-879F14.2
SYNPO1	2.49e-86	0.254118	0.609	0.608	4.98e-83	4	SYNPO
HOXC9	1.3e-85	0.179056	0.562	0.506	2.6e-82	4	HOXC9
SEMA7A1	1.66e-85	0.0792204	0.82	0.666	3.32e-82	4	SEMA7A
CCL26	2.05e-85	0.285304	0.577	0.591	4.1e-82	4	CCL26
CD821	2.59e-83	0.128127	0.756	0.678	5.17e-80	4	CD82
TUBB2A2	2.54e-82	0.169862	0.856	0.81	5.09e-79	4	TUBB2A
FNIP2	2.62e-82	0.160719	0.574	0.528	5.24e-79	4	FNIP2
S1PR3	4.41e-81	0.0799114	0.299	0.438	8.83e-78	4	S1PR3
B4GALT1	9.05e-81	0.227633	0.764	0.761	1.81e-77	4	B4GALT1
CTPS1	2.42e-80	0.0869744	0.565	0.455	4.84e-77	4	CTPS1
KCNK6	5.76e-80	0.134254	0.889	0.854	1.15e-76	4	KCNK6
MRPS141	1.66e-79	0.0508149	0.718	0.55	3.32e-76	4	MRPS14
TCF7L1	2.2e-79	0.134176	0.453	0.345	4.39e-76	4	TCF7L1
NDN	3.75e-79	0.0857382	0.418	0.301	7.5e-76	4	NDN
SLC20A2	2.96e-77	0.133533	0.72	0.633	5.92e-74	4	SLC20A2
SNRPA11	4.24e-77	0.140409	0.717	0.651	8.49e-74	4	SNRPA1
SUGCT1	7.86e-77	0.133086	0.823	0.735	1.57e-73	4	SUGCT
UBE2S	2.06e-76	0.0769042	0.949	0.894	4.12e-73	4	UBE2S
FAM207A1	4.91e-76	0.132243	0.834	0.733	9.81e-73	4	FAM207A
DHRS71	9.92e-76	0.0722558	0.852	0.691	1.98e-72	4	DHRS7
CYCS1	1.05e-74	0.129573	0.938	0.87	2.09e-71	4	CYCS
KRT181	1.56e-74	0.320802	0.983	0.989	3.12e-71	4	KRT18
CMB9-22P13.1	2.88e-74	0.183545	0.56	0.493	5.76e-71	4	CMB9-22P13.1
PHF191	1.79e-73	0.0579341	0.765	0.659	3.59e-70	4	PHF19
ELL2	3.88e-73	0.120501	0.635	0.496	7.76e-70	4	ELL2
ADRM11	9.99e-72	0.126986	0.934	0.879	2e-68	4	ADRM1
GGH1	2.05e-71	0.0661474	0.883	0.758	4.11e-68	4	GGH
ZNF703	4.53e-71	0.221615	0.664	0.754	9.05e-68	4	ZNF703
SERPINB2	1.07e-70	0.168435	0.351	0.561	2.15e-67	4	SERPINB2
TSTD11	2.81e-69	0.0789546	0.775	0.635	5.62e-66	4	TSTD1
EMP11	1.28e-67	0.223786	0.709	0.702	2.55e-64	4	EMP1
CDH8	2.63e-66	0.117263	0.352	0.495	5.26e-63	4	CDH8
A1BG-AS1	3.72e-66	0.0762319	0.366	0.529	7.45e-63	4	A1BG-AS1
LINC01013	3.14e-65	0.0519759	0.564	0.631	6.28e-62	4	LINC01013
HIST1H4H	1.16e-64	0.0799829	0.316	0.453	2.33e-61	4	HIST1H4H
UBB	2.38e-64	0.125912	0.994	0.997	4.75e-61	4	UBB
SNX71	2.4e-64	0.0556314	0.623	0.519	4.81e-61	4	SNX7
DNAJC11	2.44e-63	0.0702691	0.886	0.822	4.87e-60	4	DNAJC1
MRPL181	1.04e-61	0.115297	0.92	0.857	2.07e-58	4	MRPL18
H1F0	5.55e-61	0.0646369	0.603	0.553	1.11e-57	4	H1F0
SDC21	1e-60	0.103413	0.853	0.743	2e-57	4	SDC2
C20orf271	3.78e-60	0.118071	0.719	0.658	7.55e-57	4	C20orf27
ETFB	8.75e-60	0.12025	0.91	0.877	1.75e-56	4	ETFB
RAC3	1.29e-59	0.0885904	0.888	0.855	2.57e-56	4	RAC3
EMB	1.5e-59	0.0704953	0.395	0.553	3e-56	4	EMB
STX12	2.07e-59	0.121596	0.661	0.594	4.14e-56	4	STX12
MRPL171	2.36e-59	0.112585	0.938	0.883	4.73e-56	4	MRPL17
GNPNAT11	3.55e-59	0.0843561	0.632	0.53	7.1e-56	4	GNPNAT1
CNRIP11	2.2e-58	0.0593878	0.33	0.445	4.4e-55	4	CNRIP1
GOSR21	2.75e-58	0.109414	0.766	0.714	5.5e-55	4	GOSR2
MXRA81	3.53e-58	0.17181	0.761	0.776	7.05e-55	4	MXRA8
CCND21	1.93e-57	0.195205	0.799	0.85	3.86e-54	4	CCND2
PXDC1	2.92e-57	0.185976	0.678	0.701	5.85e-54	4	PXDC1
SNHG71	2.95e-57	0.106278	0.883	0.828	5.9e-54	4	SNHG7
EEF1B21	4.5e-57	0.0855448	0.999	0.997	9e-54	4	EEF1B2
SDF2L11	6e-57	0.1618	0.943	0.898	1.2e-53	4	SDF2L1
GRPEL11	6.73e-57	0.077569	0.825	0.679	1.35e-53	4	GRPEL1
RGMB	9.67e-57	0.148907	0.652	0.602	1.93e-53	4	RGMB
DIXDC1	1.49e-56	0.0785647	0.465	0.376	2.98e-53	4	DIXDC1
EXTL2	2.53e-55	0.144632	0.481	0.347	5.06e-52	4	EXTL2
COX5A1	5.74e-55	0.101464	0.96	0.945	1.15e-51	4	COX5A
UPP11	8.87e-55	0.143039	0.732	0.707	1.77e-51	4	UPP1
NME11	1.03e-54	0.109203	0.976	0.958	2.07e-51	4	NME1
DNASE1L1	1.65e-54	0.196501	0.598	0.627	3.29e-51	4	DNASE1L1
CYC11	7.27e-53	0.10307	0.94	0.901	1.45e-49	4	CYC1
MTHFD21	9.19e-53	0.162804	0.733	0.687	1.84e-49	4	MTHFD2
IFI16	2.29e-52	0.128915	0.555	0.499	4.59e-49	4	IFI16
ACOT91	3.98e-52	0.0613069	0.723	0.633	7.95e-49	4	ACOT9
TCHP	4.53e-52	0.0536252	0.547	0.46	9.06e-49	4	TCHP
TSPAN41	3.96e-51	0.114856	0.894	0.861	7.93e-48	4	TSPAN4
RER11	5.36e-51	0.101756	0.969	0.967	1.07e-47	4	RER1
LINC01615	2.19e-50	0.0866732	0.338	0.445	4.37e-47	4	LINC01615
MFSD2A	8.59e-50	0.0505756	0.505	0.643	1.72e-46	4	MFSD2A
AK21	2.52e-49	0.0732044	0.861	0.75	5.04e-46	4	AK2
TRPV2	3.05e-49	0.184225	0.497	0.469	6.09e-46	4	TRPV2
MRPL41	6.8e-49	0.0983423	0.796	0.758	1.36e-45	4	MRPL4
PSMB11	1.02e-48	0.108818	0.964	0.95	2.05e-45	4	PSMB1
FOXC2	2.69e-48	0.0863843	0.71	0.654	5.37e-45	4	FOXC2
VEPH1	1.69e-47	0.207353	0.54	0.534	3.38e-44	4	VEPH1
FBN2	3.83e-47	0.227514	0.581	0.619	7.67e-44	4	FBN2
DYNLL11	3.88e-47	0.0885545	0.998	0.999	7.76e-44	4	DYNLL1
COTL1	8.17e-47	0.0873297	0.994	0.99	1.63e-43	4	COTL1
FRMD4A1	9.02e-47	0.171351	0.705	0.724	1.8e-43	4	FRMD4A
PPIB1	1.06e-46	0.104143	0.994	0.993	2.11e-43	4	PPIB
BMPER	2.27e-46	0.0918506	0.355	0.499	4.55e-43	4	BMPER
HMGA11	4.34e-46	0.147227	0.982	0.967	8.68e-43	4	HMGA1
MAP3K7CL2	5.46e-46	0.120313	0.7	0.73	1.09e-42	4	MAP3K7CL
DESI11	3.97e-42	0.0860574	0.797	0.765	7.93e-39	4	DESI1
SYNPO2	2.75e-41	0.0705881	0.544	0.576	5.5e-38	4	SYNPO2
UBE2L31	4.26e-41	0.0902993	0.94	0.931	8.53e-38	4	UBE2L3
ATP2B4	7.75e-40	0.0633979	0.604	0.504	1.55e-36	4	ATP2B4
VPS29	8.17e-40	0.0832691	0.889	0.811	1.63e-36	4	VPS29
RPL22L11	2.27e-39	0.142315	0.868	0.822	4.53e-36	4	RPL22L1
FAM101B1	6.01e-39	0.10806	0.803	0.79	1.2e-35	4	FAM101B
CENPN1	1.65e-38	0.0502965	0.532	0.466	3.31e-35	4	CENPN
SERPINB8	1.67e-38	0.0802463	0.621	0.557	3.35e-35	4	SERPINB8
C6orf132	1.86e-38	0.0660175	0.447	0.592	3.73e-35	4	C6orf132
HTATIP2	1.58e-37	0.074607	0.555	0.502	3.16e-34	4	HTATIP2
MAP1LC3B1	2.83e-37	0.0858322	0.965	0.947	5.66e-34	4	MAP1LC3B
CTD-2587H24.5	3.06e-37	0.174319	0.61	0.66	6.13e-34	4	CTD-2587H24.5
BHLHE41	4.61e-37	0.0670609	0.483	0.436	9.23e-34	4	BHLHE41
SMIM3	1.14e-36	0.150162	0.584	0.637	2.28e-33	4	SMIM3
RCAN1	3.68e-36	0.134945	0.595	0.549	7.36e-33	4	RCAN1
PSMA11	1.63e-35	0.0829147	0.79	0.731	3.27e-32	4	PSMA1
ANXA21	4.61e-35	0.0651877	1	1	9.23e-32	4	ANXA2
FHL22	5.11e-35	0.092002	0.963	0.962	1.02e-31	4	FHL2
PID1	7.48e-35	0.0686777	0.273	0.266	1.5e-31	4	PID1
RTCA1	2.86e-34	0.0962027	0.715	0.693	5.71e-31	4	RTCA
IL61	1.7e-33	0.172208	0.839	0.862	3.4e-30	4	IL6
DOCK5	9.72e-33	0.145923	0.511	0.452	1.94e-29	4	DOCK5
HMOX21	1.79e-31	0.0866437	0.724	0.694	3.58e-28	4	HMOX2
SH2D4A	2.13e-31	0.104614	0.421	0.294	4.26e-28	4	SH2D4A
PSMB31	5.29e-31	0.0909903	0.949	0.908	1.06e-27	4	PSMB3
PGK11	1.27e-30	0.0849842	0.946	0.906	2.54e-27	4	PGK1
KLF2	1.42e-30	0.161403	0.535	0.569	2.84e-27	4	KLF2
GALNT6	2.1e-30	0.135502	0.605	0.614	4.21e-27	4	GALNT6
PRADC1	2.6e-30	0.0835355	0.532	0.471	5.2e-27	4	PRADC1
IGFBP32	3.18e-30	0.177838	0.664	0.641	6.35e-27	4	IGFBP3
TXN1	3.4e-30	0.0607658	0.997	0.997	6.8e-27	4	TXN
SOX9	4.66e-30	0.0824182	0.645	0.598	9.33e-27	4	SOX9
ANKRD13A	5.01e-30	0.0941897	0.596	0.571	1e-26	4	ANKRD13A
NOP161	5.91e-29	0.0595947	0.798	0.701	1.18e-25	4	NOP16
PPP1R15A1	2.63e-28	0.149576	0.674	0.728	5.26e-25	4	PPP1R15A
VCL	5.75e-28	0.0641137	0.866	0.813	1.15e-24	4	VCL
CD631	2.7e-27	0.0608857	1	0.999	5.39e-24	4	CD63
DNAJB111	3.54e-27	0.0619223	0.871	0.8	7.08e-24	4	DNAJB11
MFI21	3.31e-26	0.053196	0.395	0.514	6.62e-23	4	MFI2
MSC-AS1	6.98e-26	0.103821	0.347	0.438	1.4e-22	4	MSC-AS1
NEAT11	1.59e-25	0.0877626	0.999	0.999	3.18e-22	4	NEAT1
FDFT1	2.48e-25	0.104122	0.69	0.696	4.96e-22	4	FDFT1
FHL1	4.21e-25	0.131267	0.424	0.34	8.42e-22	4	FHL1
DDIT3	6.77e-25	0.0804958	0.548	0.684	1.35e-21	4	DDIT3
LRRC32	1.23e-24	0.0875443	0.479	0.465	2.47e-21	4	LRRC32
GAPDH1	1.86e-24	0.0664585	1	1	3.71e-21	4	GAPDH
RGS31	2.56e-24	0.0998273	0.764	0.794	5.11e-21	4	RGS3
ADIRF	4.79e-24	0.218076	0.439	0.671	9.57e-21	4	ADIRF
LYPD11	2.13e-23	0.158291	0.74	0.837	4.27e-20	4	LYPD1
ATP5G11	3.3e-23	0.0707896	0.984	0.98	6.61e-20	4	ATP5G1
CDKN1A2	4.17e-23	0.152178	0.925	0.962	8.33e-20	4	CDKN1A
DUSP11	5.02e-23	0.0683183	0.792	0.74	1e-19	4	DUSP1
KIF5B	6.1e-22	0.0571385	0.92	0.894	1.22e-18	4	KIF5B
MRPL121	9.13e-22	0.0617114	0.916	0.901	1.83e-18	4	MRPL12
LPXN	2.71e-21	0.203332	0.506	0.526	5.43e-18	4	LPXN
HES1	3.41e-21	0.146689	0.632	0.653	6.82e-18	4	HES1
BEX1	3.7e-21	0.14301	0.323	0.364	7.4e-18	4	BEX1
DPYSL31	4.36e-21	0.0934109	0.848	0.894	8.72e-18	4	DPYSL3
TNFRSF10D2	5.87e-21	0.103003	0.742	0.791	1.17e-17	4	TNFRSF10D
HLA-B	2.67e-20	0.0623242	0.922	0.899	5.34e-17	4	HLA-B
ATP1B31	2.42e-19	0.0566717	0.928	0.893	4.83e-16	4	ATP1B3
IER21	1.55e-18	0.114986	0.628	0.623	3.1e-15	4	IER2
HIST3H2A	1.65e-18	0.0958617	0.57	0.579	3.3e-15	4	HIST3H2A
SQLE	5.84e-18	0.0809377	0.677	0.614	1.17e-14	4	SQLE
FRMD6-AS1	1.31e-17	0.155321	0.437	0.605	2.61e-14	4	FRMD6-AS1
MDH21	5.59e-17	0.0535676	0.959	0.948	1.12e-13	4	MDH2
PLCE1-AS1	1.16e-16	0.115606	0.419	0.57	2.32e-13	4	PLCE1-AS1
CLDN11	1.42e-16	0.10437	0.355	0.498	2.83e-13	4	CLDN11
TRIB31	2.8e-16	0.123044	0.562	0.556	5.61e-13	4	TRIB3
LIMS2	1.34e-15	0.167168	0.525	0.601	2.68e-12	4	LIMS2
CD200	2.14e-15	0.0617735	0.351	0.406	4.28e-12	4	CD200
2019-03-03	2.75e-15	0.153225	0.488	0.548	5.49e-12	4	2019-03-03
RP11-680A11.5	7.98e-15	0.178364	0.544	0.617	1.6e-11	4	RP11-680A11.5
SCD	4.01e-14	0.122564	0.367	0.44	8.02e-11	4	SCD
AGAP2-AS1	4.56e-14	0.129314	0.466	0.45	9.11e-11	4	AGAP2-AS1
EBNA1BP21	7.79e-14	0.063537	0.924	0.875	1.56e-10	4	EBNA1BP2
ST3GAL1	1.34e-13	0.060332	0.628	0.583	2.68e-10	4	ST3GAL1
RP5-1172A22.11	1.12e-12	0.0500937	0.514	0.653	2.23e-09	4	RP5-1172A22.1
PDIA31	1.32e-12	0.0565205	0.958	0.902	2.64e-09	4	PDIA3
MSC	3.79e-12	0.210802	0.442	0.431	7.58e-09	4	MSC
PRR34-AS1	1.84e-11	0.0584023	0.652	0.703	3.69e-08	4	PRR34-AS1
LDLR	2.85e-11	0.0557048	0.258	0.267	5.7e-08	4	LDLR
EIF51	4.29e-11	0.0532761	0.967	0.948	8.58e-08	4	EIF5
SYT1	1.01e-10	0.189158	0.553	0.624	2.02e-07	4	SYT1
THBS2	1.54e-10	0.184208	0.53	0.705	3.07e-07	4	THBS2
CXCL81	2.09e-10	0.052604	0.932	0.947	4.18e-07	4	CXCL8
2019-03-04	7.48e-10	0.0671467	0.424	0.511	1.5e-06	4	2019-03-04
DSEL	1.9e-09	0.0976858	0.595	0.635	3.8e-06	4	DSEL
LMOD1	2.61e-09	0.152669	0.384	0.476	5.22e-06	4	LMOD1
RARB	9.87e-09	0.080184	0.532	0.568	1.97e-05	4	RARB
FABP51	2.62e-08	0.312609	0.963	0.932	5.24e-05	4	FABP5
SEMA5A	3.99e-08	0.149037	0.499	0.665	7.97e-05	4	SEMA5A
TRBC2	4.23e-08	0.130627	0.406	0.394	8.47e-05	4	TRBC2
BDKRB1	4.56e-08	0.143716	0.442	0.574	9.12e-05	4	BDKRB1
MAFF	3.01e-07	0.0840148	0.641	0.646	0.000602094	4	MAFF
ANOS11	4.46e-07	0.0505926	0.651	0.688	0.000891521	4	ANOS1
SMYD3	6.28e-07	0.115852	0.516	0.55	0.0012561	4	SMYD3
HIST1H2BC	6.98e-07	0.0588211	0.353	0.329	0.00139521	4	HIST1H2BC
SERPINB7	7.61e-07	0.0662459	0.37	0.406	0.0015227	4	SERPINB7
CTNNB11	8.89e-07	0.114522	0.758	0.772	0.00177825	4	CTNNB1
CHAC1	8.91e-07	0.0607409	0.56	0.627	0.00178299	4	CHAC1
CCDC85B1	2.22e-06	0.0688911	0.896	0.899	0.00444824	4	CCDC85B
PDCD1LG2	4.31e-06	0.0818492	0.38	0.412	0.00861433	4	PDCD1LG2
PMAIP11	1.48e-05	0.0602971	0.69	0.667	0.0296137	4	PMAIP1
ICAM3	1.87e-05	0.050295	0.488	0.557	0.0374545	4	ICAM3
NAV3	2.67e-05	0.0839506	0.424	0.5	0.0533559	4	NAV3
AFP	6.07e-05	0.0582034	0.313	0.289	0.121332	4	AFP
OXTR	0.000125993	0.0547631	0.397	0.401	0.251987	4	OXTR
ADAMTSL1	0.000181502	0.176833	0.454	0.523	0.363004	4	ADAMTSL1
HSPA51	0.000550392	0.142858	0.88	0.854	1	4	HSPA5
HECW2	0.00101352	0.0728396	0.463	0.516	1	4	HECW2
FOXC2-AS1	0.00131201	0.124061	0.584	0.693	1	4	FOXC2-AS1
OLR1	0.00135237	0.060735	0.408	0.401	1	4	OLR1
PRSS31	0.00149854	0.15541	0.774	0.786	1	4	PRSS3
SNAI2	0.00155274	0.159336	0.505	0.569	1	4	SNAI2
DDIT41	0.00207273	0.0867189	0.479	0.536	1	4	DDIT4
ALDH1A31	0.00217695	0.158327	0.58	0.734	1	4	ALDH1A3
HSPB6	0.00845711	0.157292	0.466	0.532	1	4	HSPB6
TAGLN2	0	1.02353	1	0.996	0	5	TAGLN
LGALS11	0	0.758971	1	1	0	5	LGALS1
ANXA22	0	0.664246	1	1	0	5	ANXA2
S100A112	0	0.621724	1	1	0	5	S100A11
MYL61	0	0.550474	1	1	0	5	MYL6
VIM2	1.9e-277	0.62666	1	1	3.8e-274	5	VIM
MYL92	4.37e-261	0.735562	0.994	0.981	8.74e-258	5	MYL9
HSPB11	9.72e-249	0.690376	0.994	0.986	1.94e-245	5	HSPB1
ACTB2	1e-243	0.419246	1	1	2e-240	5	ACTB
SERPIND1	3.57e-243	0.0517033	0.772	0.352	7.14e-240	5	SERPIND1
TPM21	2.62e-241	0.690465	1	0.997	5.24e-238	5	TPM2
SKP1	6.38e-239	0.673116	0.992	0.965	1.28e-235	5	SKP1
UBB1	3.78e-221	0.517784	0.999	0.997	7.56e-218	5	UBB
ATP5J21	2.74e-218	0.487559	0.999	0.994	5.49e-215	5	ATP5J2
RAB33A1	7.28e-213	0.0540212	0.878	0.681	1.46e-209	5	RAB33A
PRDX61	4.82e-202	0.735259	0.983	0.963	9.63e-199	5	PRDX6
GAPDH2	1.21e-194	0.336661	1	1	2.43e-191	5	GAPDH
PRDX11	4.65e-193	0.571779	0.99	0.975	9.29e-190	5	PRDX1
UQCRB	1.89e-179	0.610824	0.98	0.962	3.77e-176	5	UQCRB
ACTG21	3.76e-175	1.07927	0.898	0.747	7.53e-172	5	ACTG2
HBD	7.44e-169	0.0531409	0.126	0.341	1.49e-165	5	HBD
FXYD11	1.25e-164	0.0912656	0.835	0.603	2.5e-161	5	FXYD1
SEPW11	8.42e-163	0.52869	0.984	0.969	1.68e-159	5	SEPW1
HRAT17	2.27e-153	0.058182	0.681	0.273	4.55e-150	5	HRAT17
TXN2	2.32e-151	0.335514	1	0.997	4.63e-148	5	TXN
POPDC31	2.19e-147	0.0701205	0.776	0.334	4.39e-144	5	POPDC3
CRABP2	9.91e-144	0.059697	0.728	0.416	1.98e-140	5	CRABP2
HSPA81	4.8e-141	0.66561	0.938	0.909	9.61e-138	5	HSPA8
CCL51	2.57e-137	0.164793	0.138	0.371	5.14e-134	5	CCL5
UCHL11	5.32e-133	0.400366	0.999	0.999	1.06e-129	5	UCHL1
GSTO12	6.73e-133	0.577276	0.939	0.912	1.35e-129	5	GSTO1
ACTA21	1.42e-128	1.0293	0.843	0.832	2.84e-125	5	ACTA2
CYCS2	1.55e-128	0.543147	0.943	0.875	3.1e-125	5	CYCS
HSP90AA11	1.11e-126	0.449775	0.996	0.994	2.22e-123	5	HSP90AA1
MAP1LC3B2	2.05e-126	0.45768	0.965	0.948	4.1e-123	5	MAP1LC3B
APOA1	1.64e-124	0.073087	0.158	0.336	3.29e-121	5	APOA1
MYL12B2	4.95e-124	0.337183	1	0.998	9.89e-121	5	MYL12B
KCNG11	2.09e-121	0.104448	0.899	0.745	4.17e-118	5	KCNG1
CALD12	4.26e-117	0.453943	0.998	0.999	8.52e-114	5	CALD1
DIRAS31	7.82e-117	0.209674	0.9	0.771	1.56e-113	5	DIRAS3
NPM11	2.55e-114	0.457695	0.98	0.976	5.09e-111	5	NPM1
S100A101	2.61e-113	0.37387	1	0.998	5.23e-110	5	S100A10
CALM21	8.35e-113	0.41568	0.986	0.998	1.67e-109	5	CALM2
ARPC32	2.22e-111	0.330226	0.996	0.993	4.43e-108	5	ARPC3
COX7A11	1.46e-110	0.138044	0.296	0.651	2.93e-107	5	COX7A1
PHLDA22	3.44e-107	0.507472	0.98	0.95	6.88e-104	5	PHLDA2
HIST1H4H1	7.29e-103	0.056382	0.232	0.445	1.46e-99	5	HIST1H4H
EMC2	8.29e-102	0.107104	0.69	0.363	1.66e-98	5	EMC2
MYL12A2	1.23e-100	0.282513	1	0.999	2.47e-97	5	MYL12A
RP11-1398P2.11	6.48e-100	0.0504393	0.718	0.401	1.3e-96	5	RP11-1398P2.1
PGK12	3.9e-98	0.47001	0.926	0.909	7.8e-95	5	PGK1
NDUFA121	6.02e-98	0.448227	0.917	0.849	1.2e-94	5	NDUFA12
HHIP2	8.95e-96	0.0537393	0.378	0.731	1.79e-92	5	HHIP
ITGA41	2.97e-93	0.0565238	0.706	0.428	5.93e-90	5	ITGA4
PPIL11	5.17e-93	0.197741	0.731	0.404	1.03e-89	5	PPIL1
MMP1	2.91e-91	0.115788	0.181	0.236	5.82e-88	5	MMP1
HSP90AB11	3.63e-90	0.372271	0.991	0.99	7.27e-87	5	HSP90AB1
NDN1	3.45e-89	0.0969863	0.659	0.305	6.9e-86	5	NDN
HAPLN11	2.22e-86	0.293407	0.831	0.702	4.44e-83	5	HAPLN1
COX5A2	6.81e-82	0.384479	0.949	0.947	1.36e-78	5	COX5A
ANXA12	3.21e-80	0.459422	0.849	0.729	6.42e-77	5	ANXA1
SELM1	3.24e-80	0.48295	0.932	0.949	6.47e-77	5	SELM
TIMP11	1.46e-79	0.816526	0.974	0.981	2.93e-76	5	TIMP1
NME12	1.17e-77	0.375431	0.98	0.959	2.33e-74	5	NME1
ALDOA2	7.8e-77	0.284684	0.99	0.993	1.56e-73	5	ALDOA
MGARP	3.01e-76	0.0580715	0.212	0.454	6.03e-73	5	MGARP
PSMD82	1.23e-74	0.361114	0.953	0.932	2.46e-71	5	PSMD8
COX7B1	2.97e-74	0.345751	0.984	0.978	5.95e-71	5	COX7B
DDR21	5.45e-73	0.0821256	0.375	0.659	1.09e-69	5	DDR2
COL6A31	1.15e-70	0.224947	0.903	0.782	2.3e-67	5	COL6A3
RP11-390P2.41	5.15e-69	0.104886	0.895	0.756	1.03e-65	5	RP11-390P2.4
MLLT112	1.79e-67	0.448182	0.916	0.874	3.58e-64	5	MLLT11
ENO11	6.54e-67	0.301416	0.981	0.985	1.31e-63	5	ENO1
NOP581	5.4e-66	0.219335	0.897	0.543	1.08e-62	5	NOP58
C6orf1321	2.88e-62	0.0569059	0.79	0.575	5.76e-59	5	C6orf132
COTL11	8.01e-62	0.387043	0.991	0.99	1.6e-58	5	COTL1
MSC-AS11	1.16e-59	0.0510415	0.678	0.426	2.32e-56	5	MSC-AS1
RP11-115D19.1	8.77e-59	0.0555578	0.229	0.299	1.75e-55	5	RP11-115D19.1
RGS41	1.51e-56	0.339657	0.76	0.743	3.02e-53	5	RGS4
PSMB32	3.78e-56	0.34654	0.926	0.911	7.56e-53	5	PSMB3
ANXA61	5.67e-56	0.45795	0.796	0.743	1.13e-52	5	ANXA6
MMP23B1	9.31e-56	0.183424	0.867	0.645	1.86e-52	5	MMP23B
PSME22	1.46e-55	0.366736	0.862	0.827	2.92e-52	5	PSME2
HIST3H2A1	1.05e-54	0.0524363	0.389	0.581	2.09e-51	5	HIST3H2A
LDHB1	1.87e-54	0.340246	0.989	0.986	3.74e-51	5	LDHB
NDUFB31	5.24e-54	0.331698	0.926	0.931	1.05e-50	5	NDUFB3
NDUFAB12	3.4e-52	0.374962	0.871	0.839	6.79e-49	5	NDUFAB1
H2AFJ1	1.39e-50	0.421282	0.867	0.883	2.79e-47	5	H2AFJ
CALM12	6.9e-50	0.26382	1	0.994	1.38e-46	5	CALM1
KRT81	3.75e-49	0.292176	0.976	0.98	7.5e-46	5	KRT8
ISG152	1.12e-47	0.379193	0.971	0.967	2.24e-44	5	ISG15
EIF5A2	2.14e-47	0.282477	0.991	0.985	4.27e-44	5	EIF5A
FLG1	2.19e-47	0.0833327	0.213	0.353	4.38e-44	5	FLG
ZNF880	1.27e-46	0.0619323	0.225	0.31	2.54e-43	5	ZNF880
ECH11	2.85e-46	0.329024	0.87	0.713	5.7e-43	5	ECH1
PSMA12	6.04e-46	0.451277	0.785	0.736	1.21e-42	5	PSMA1
TRBC21	4.43e-44	0.0801394	0.304	0.396	8.85e-41	5	TRBC2
TALDO11	1.49e-43	0.270357	0.953	0.96	2.99e-40	5	TALDO1
TCEB11	2.78e-42	0.250169	0.955	0.961	5.57e-39	5	TCEB1
IL1B1	7.34e-42	0.680415	0.796	0.809	1.47e-38	5	IL1B
VDAC21	4.67e-41	0.269222	0.972	0.971	9.34e-38	5	VDAC2
LARP61	5.07e-41	0.328589	0.906	0.887	1.01e-37	5	LARP6
APOBEC3C	6.67e-39	0.131122	0.887	0.687	1.33e-35	5	APOBEC3C
EIF3E1	1.04e-38	0.334306	0.844	0.841	2.08e-35	5	EIF3E
RAN1	6.21e-37	0.197097	0.988	0.99	1.24e-33	5	RAN
PFDN22	1.6e-36	0.219767	0.969	0.959	3.2e-33	5	PFDN2
HSPD11	1.01e-35	0.346328	0.822	0.824	2.01e-32	5	HSPD1
DAD11	1.07e-35	0.235872	0.983	0.98	2.14e-32	5	DAD1
CLEC11A1	2.86e-35	0.155126	0.823	0.663	5.73e-32	5	CLEC11A
PDZD111	1.28e-33	0.331486	0.875	0.79	2.55e-30	5	PDZD11
SOD11	1.65e-32	0.190324	0.996	0.994	3.29e-29	5	SOD1
B2M2	4.05e-32	0.2867	0.984	0.994	8.09e-29	5	B2M
ADIRF1	1.62e-31	0.0975896	0.412	0.655	3.24e-28	5	ADIRF
CCL261	1.85e-30	0.136712	0.401	0.593	3.7e-27	5	CCL26
RPL22L12	1.19e-29	0.389853	0.886	0.825	2.38e-26	5	RPL22L1
FLT11	4.56e-29	0.300191	0.778	0.712	9.12e-26	5	FLT1
PSMC41	9.6e-29	0.369588	0.711	0.601	1.92e-25	5	PSMC4
PSMB12	1.87e-28	0.240785	0.94	0.951	3.75e-25	5	PSMB1
RCN31	7.95e-28	0.096647	0.878	0.733	1.59e-24	5	RCN3
LDHA1	1.05e-27	0.264258	0.956	0.957	2.1e-24	5	LDHA
EEF1B22	1.25e-27	0.148382	0.998	0.997	2.51e-24	5	EEF1B2
C14orf1661	1.62e-26	0.255699	0.948	0.946	3.24e-23	5	C14orf166
SSBP11	2.64e-26	0.270935	0.83	0.888	5.28e-23	5	SSBP1
TIMP31	1.59e-25	0.476454	0.73	0.767	3.19e-22	5	TIMP3
MDH11	1.85e-25	0.327159	0.73	0.611	3.69e-22	5	MDH1
NUPR11	2.84e-24	0.0826184	0.248	0.331	5.67e-21	5	NUPR1
AP1M2	8.02e-24	0.0672895	0.631	0.353	1.6e-20	5	AP1M2
ADI11	1.89e-23	0.326435	0.812	0.844	3.78e-20	5	ADI1
ATP5C11	2.45e-23	0.258484	0.811	0.814	4.91e-20	5	ATP5C1
TMEM141	4.76e-23	0.271143	0.909	0.818	9.51e-20	5	TMEM141
NME42	7.62e-23	0.211669	0.978	0.971	1.52e-19	5	NME4
RSU12	2.02e-22	0.253054	0.861	0.822	4.05e-19	5	RSU1
THY11	4.26e-22	0.45003	0.699	0.719	8.52e-19	5	THY1
AEBP11	4.41e-22	0.0569698	0.891	0.769	8.83e-19	5	AEBP1
SLC25A51	4.61e-22	0.224242	0.956	0.949	9.21e-19	5	SLC25A5
MAP1A1	6.49e-22	0.31864	0.68	0.668	1.3e-18	5	MAP1A
STX121	1.08e-21	0.244474	0.735	0.598	2.15e-18	5	STX12
COPS62	3.24e-21	0.235597	0.824	0.831	6.48e-18	5	COPS6
RGS51	4.73e-21	0.111617	0.32	0.396	9.46e-18	5	RGS5
CCT81	1.49e-20	0.317242	0.69	0.647	2.98e-17	5	CCT8
AIMP11	2.17e-20	0.299743	0.74	0.682	4.35e-17	5	AIMP1
ACTBL21	4.54e-20	0.066628	0.678	0.531	9.08e-17	5	ACTBL2
SERPINE11	5.16e-20	0.370839	0.895	0.904	1.03e-16	5	SERPINE1
RRP151	1.27e-19	0.233973	0.724	0.564	2.54e-16	5	RRP15
SRM2	1.91e-19	0.306182	0.963	0.941	3.82e-16	5	SRM
SH3KBP11	3.39e-19	0.330669	0.759	0.677	6.78e-16	5	SH3KBP1
L3HYPDH	6.72e-18	0.0575344	0.665	0.452	1.34e-14	5	L3HYPDH
ATP5G12	2.07e-17	0.150978	0.982	0.981	4.15e-14	5	ATP5G1
CCT51	2.74e-17	0.262492	0.748	0.747	5.47e-14	5	CCT5
BEX11	4.63e-17	0.163882	0.36	0.361	9.25e-14	5	BEX1
KPNA2	1.94e-16	0.0905663	0.749	0.517	3.87e-13	5	KPNA2
NDUFB82	1.95e-16	0.169359	0.961	0.971	3.89e-13	5	NDUFB8
ECI21	2.33e-16	0.251268	0.808	0.836	4.66e-13	5	ECI2
SUGCT2	3.64e-16	0.168378	0.837	0.742	7.28e-13	5	SUGCT
PSMA41	6.17e-16	0.23621	0.838	0.867	1.23e-12	5	PSMA4
GSTM31	7.4e-16	0.347711	0.771	0.812	1.48e-12	5	GSTM3
HIST1H2AC1	1.12e-15	0.0877488	0.405	0.534	2.24e-12	5	HIST1H2AC
TUBA1A2	1.77e-15	0.134057	0.855	0.959	3.53e-12	5	TUBA1A
NUDT11	1.78e-15	0.131729	0.878	0.718	3.56e-12	5	NUDT1
RP11-680A11.51	2.32e-15	0.133178	0.469	0.613	4.63e-12	5	RP11-680A11.5
VPS291	2.61e-15	0.28751	0.798	0.819	5.23e-12	5	VPS29
EXTL21	3.3e-15	0.126303	0.544	0.356	6.59e-12	5	EXTL2
CCDC34	3.54e-14	0.10679	0.702	0.548	7.08e-11	5	CCDC34
NPPB2	5.45e-14	0.267329	0.916	0.926	1.09e-10	5	NPPB
MFAP51	1.21e-13	0.343772	0.74	0.744	2.42e-10	5	MFAP5
LPXN1	1.35e-13	0.142657	0.638	0.523	2.71e-10	5	LPXN
PRADC11	1.9e-13	0.111668	0.614	0.474	3.81e-10	5	PRADC1
NLRP11	2.49e-13	0.238898	0.814	0.76	4.98e-10	5	NLRP1
LIMS21	4.4e-13	0.0513877	0.472	0.596	8.8e-10	5	LIMS2
SNHG181	8.46e-13	0.0664319	0.727	0.778	1.69e-09	5	SNHG18
DCAF131	2.27e-12	0.136927	0.573	0.414	4.54e-09	5	DCAF13
CCDC801	5.97e-12	0.357309	0.67	0.653	1.19e-08	5	CCDC80
CNN11	8.77e-12	0.211423	0.629	0.536	1.75e-08	5	CNN1
TSTD12	9.51e-12	0.224191	0.743	0.646	1.9e-08	5	TSTD1
IFITM21	1.67e-11	0.0813788	0.894	0.794	3.35e-08	5	IFITM2
LAYN1	2.17e-11	0.132528	0.759	0.602	4.33e-08	5	LAYN
HSPE11	3.17e-11	0.188309	0.892	0.908	6.35e-08	5	HSPE1
HOXC81	5.04e-11	0.0606398	0.705	0.537	1.01e-07	5	HOXC8
DSC31	5.07e-11	0.0682217	0.618	0.681	1.01e-07	5	DSC3
CFL22	6.93e-11	0.282287	0.66	0.681	1.39e-07	5	CFL2
CCL201	1.39e-10	0.0732478	0.699	0.631	2.78e-07	5	CCL20
GREM11	1.99e-10	0.127444	0.48	0.663	3.98e-07	5	GREM1
TSPO2	2.16e-10	0.0926682	0.997	0.999	4.32e-07	5	TSPO
HYI1	2.4e-10	0.179346	0.898	0.818	4.8e-07	5	HYI
C4orf31	3.38e-10	0.136093	0.955	0.975	6.76e-07	5	C4orf3
RP5-1172A22.12	4.85e-10	0.0595147	0.601	0.641	9.69e-07	5	RP5-1172A22.1
SULF11	5.63e-10	0.12924	0.633	0.683	1.13e-06	5	SULF1
C20orf272	7.47e-10	0.259857	0.665	0.664	1.49e-06	5	C20orf27
SH2D4A1	1.81e-09	0.100019	0.46	0.303	3.62e-06	5	SH2D4A
UQCRC21	3.76e-09	0.223739	0.704	0.652	7.52e-06	5	UQCRC2
MRPL221	4.2e-09	0.149698	0.68	0.548	8.41e-06	5	MRPL22
MRPS142	4.47e-09	0.0703572	0.494	0.566	8.93e-06	5	MRPS14
HIST1H2BD1	4.74e-09	0.0527082	0.405	0.478	9.49e-06	5	HIST1H2BD
HSPB61	5.02e-09	0.218057	0.434	0.527	1e-05	5	HSPB6
PRR34-AS11	5.35e-09	0.302498	0.67	0.699	1.07e-05	5	PRR34-AS1
ILF21	1.63e-08	0.128354	0.78	0.637	3.26e-05	5	ILF2
DESI12	1.76e-08	0.19274	0.773	0.768	3.51e-05	5	DESI1
MT2A2	3.89e-08	0.159801	1	1	7.79e-05	5	MT2A
MRPL31	3.95e-08	0.104494	0.763	0.606	7.9e-05	5	MRPL3
ARPC1A2	7.18e-08	0.152652	0.889	0.923	0.000143687	5	ARPC1A
COPZ21	1.09e-07	0.0981412	0.822	0.72	0.000217532	5	COPZ2
HOXC91	1.18e-07	0.207004	0.557	0.51	0.000235506	5	HOXC9
STMN11	1.5e-07	0.295667	0.969	0.959	0.000299751	5	STMN1
XRCC41	1.6e-07	0.173215	0.581	0.528	0.000320459	5	XRCC4
PSMA31	2.03e-07	0.212586	0.718	0.733	0.000405719	5	PSMA3
GLIPR12	2.61e-07	0.210406	0.953	0.962	0.000521681	5	GLIPR1
MDH22	7.7e-07	0.115086	0.924	0.95	0.00154088	5	MDH2
CAPG1	7.91e-07	0.15002	0.908	0.761	0.00158221	5	CAPG
PLOD21	8.62e-07	0.429049	0.746	0.738	0.00172307	5	PLOD2
KDELR31	8.92e-07	0.0513492	0.688	0.824	0.00178408	5	KDELR3
ENO2	9.95e-07	0.0930777	0.729	0.651	0.00199	5	ENO2
RTCA2	1.03e-06	0.0551493	0.589	0.697	0.00206062	5	RTCA
PAICS1	1.32e-06	0.0862993	0.656	0.507	0.00264094	5	PAICS
PRRT3-AS1	2.25e-06	0.0614093	0.325	0.24	0.00450365	5	PRRT3-AS1
AC013461.11	3.26e-06	0.0591957	0.529	0.59	0.00651877	5	AC013461.1
PCDH101	5.01e-06	0.151682	0.555	0.643	0.010014	5	PCDH10
NT5E1	5.97e-06	0.0977297	0.697	0.813	0.0119449	5	NT5E
DPM11	8.55e-06	0.0888633	0.423	0.417	0.0170975	5	DPM1
PLP22	1.12e-05	0.124544	0.913	0.938	0.0223236	5	PLP2
ESD1	1.12e-05	0.185013	0.735	0.721	0.0224905	5	ESD
CDC1231	1.23e-05	0.0587943	0.614	0.683	0.0245325	5	CDC123
MIR4458HG1	1.57e-05	0.205821	0.562	0.471	0.0314008	5	MIR4458HG
PPIH	2.39e-05	0.154556	0.529	0.427	0.0478677	5	PPIH
PSMB21	3.09e-05	0.133872	0.967	0.946	0.0618178	5	PSMB2
C1orf1431	4.65e-05	0.128193	0.48	0.511	0.0930079	5	C1orf143
GS1-600G8.51	5.37e-05	0.362521	0.526	0.738	0.107421	5	GS1-600G8.5
DIAPH3	5.55e-05	0.113692	0.61	0.502	0.111052	5	DIAPH3
ARHGDIB1	6.69e-05	0.170231	0.609	0.557	0.133775	5	ARHGDIB
MGST11	9.35e-05	0.307108	0.609	0.548	0.187051	5	MGST1
RP11-295G20.21	0.000179686	0.194683	0.781	0.776	0.359373	5	RP11-295G20.2
UBE2L32	0.000244131	0.146561	0.904	0.932	0.488263	5	UBE2L3
CRYAB1	0.000251378	0.468352	0.567	0.563	0.502756	5	CRYAB
SSR32	0.000358606	0.0686831	0.951	0.971	0.717212	5	SSR3
PRDX42	0.000382687	0.0511201	0.899	0.955	0.765373	5	PRDX4
CCT21	0.000909921	0.113699	0.786	0.846	1	5	CCT2
YBX32	0.000942591	0.105883	0.926	0.84	1	5	YBX3
NANS1	0.000983401	0.141305	0.929	0.853	1	5	NANS
VEPH11	0.00117154	0.165789	0.47	0.536	1	5	VEPH1
GPN3	0.00119	0.0677124	0.748	0.632	1	5	GPN3
BLVRB2	0.00125815	0.203552	0.714	0.772	1	5	BLVRB
MANF2	0.00132429	0.150107	0.939	0.89	1	5	MANF
SBDS2	0.00139808	0.150907	0.765	0.838	1	5	SBDS
C12orf751	0.00155851	0.117141	0.992	0.998	1	5	C12orf75
CMBL	0.00254762	0.0870461	0.672	0.627	1	5	CMBL
PDLIM31	0.00279485	0.0794413	0.503	0.596	1	5	PDLIM3
SERPINE21	0.00442278	0.0855725	0.734	0.84	1	5	SERPINE2
PPIB2	0.00511528	0.112725	0.968	0.994	1	5	PPIB
MYDGF2	0.00565754	0.140112	0.935	0.976	1	5	MYDGF
KIF5B1	0.00603675	0.139449	0.853	0.897	1	5	KIF5B
NFU1	0.00706958	0.138164	0.694	0.661	1	5	NFU1
ADAM191	0.00761243	0.0852743	0.795	0.829	1	5	ADAM19
TFPI22	0.00779128	0.312023	0.618	0.716	1	5	TFPI2
UBE2C	0	1.65671	0.888	0.466	0	6	UBE2C
TUBA1B1	0	1.52313	1	0.863	0	6	TUBA1B
H2AFZ2	0	1.42612	1	0.979	0	6	H2AFZ
HMGB2	0	1.40524	0.954	0.614	0	6	HMGB2
CENPF	0	1.36968	0.93	0.482	0	6	CENPF
CKS1B	0	1.34554	0.982	0.718	0	6	CKS1B
PTTG11	0	1.33288	0.98	0.618	0	6	PTTG1
UBE2S1	0	1.3187	0.99	0.893	0	6	UBE2S
HIST1H4C	0	1.31313	0.985	0.923	0	6	HIST1H4C
KIAA01011	0	1.31102	0.966	0.66	0	6	KIAA0101
HMGB11	0	1.26794	1	0.98	0	6	HMGB1
HMGA12	0	1.16653	1	0.966	0	6	HMGA1
BIRC51	0	1.15686	0.951	0.556	0	6	BIRC5
CDC20	0	1.09724	0.884	0.42	0	6	CDC20
HMGN21	0	1.05025	0.994	0.842	0	6	HMGN2
RANBP11	0	1.00973	0.997	0.945	0	6	RANBP1
CKS2	0	0.977621	0.946	0.696	0	6	CKS2
EIF4EBP12	0	0.977513	0.995	0.886	0	6	EIF4EBP1
TUBB4B1	0	0.976862	0.986	0.785	0	6	TUBB4B
DEK1	0	0.949748	0.989	0.802	0	6	DEK
TYMS1	0	0.947614	0.939	0.66	0	6	TYMS
HNRNPA11	0	0.864477	0.999	0.953	0	6	HNRNPA1
ANP32B1	0	0.86138	0.986	0.814	0	6	ANP32B
CMSS12	0	0.834757	0.934	0.697	0	6	CMSS1
RPL22L13	0	0.832148	0.988	0.817	0	6	RPL22L1
SMC4	0	0.828661	0.873	0.379	0	6	SMC4
PRC1	0	0.8274	0.869	0.433	0	6	PRC1
DTYMK1	0	0.799579	0.973	0.793	0	6	DTYMK
MKI67	0	0.792382	0.84	0.424	0	6	MKI67
NCL1	0	0.786511	0.998	0.963	0	6	NCL
GTSE1	0	0.782744	0.789	0.342	0	6	GTSE1
PHF192	0	0.778599	0.882	0.655	0	6	PHF19
TUBA1C1	0	0.777672	0.983	0.776	0	6	TUBA1C
G0S21	0	0.777636	0.905	0.559	0	6	G0S2
HSPD12	0	0.777003	0.991	0.814	0	6	HSPD1
HNRNPD1	0	0.771772	0.989	0.855	0	6	HNRNPD
CENPW1	0	0.770057	0.911	0.553	0	6	CENPW
NPM12	0	0.753617	0.999	0.975	0	6	NPM1
TOP2A	0	0.75311	0.703	0.453	0	6	TOP2A
SNRPB1	0	0.715501	0.995	0.936	0	6	SNRPB
HNRNPDL1	0	0.710511	0.984	0.863	0	6	HNRNPDL
CDKN31	0	0.707965	0.813	0.483	0	6	CDKN3
DNMT11	0	0.706591	0.914	0.63	0	6	DNMT1
TUBB1	0	0.687322	0.999	0.978	0	6	TUBB
CCNB1	0	0.681015	0.778	0.332	0	6	CCNB1
TK11	0	0.678333	0.811	0.508	0	6	TK1
TPX2	0	0.67713	0.819	0.288	0	6	TPX2
HNRNPA2B11	0	0.672882	0.996	0.921	0	6	HNRNPA2B1
NUSAP1	0	0.668949	0.787	0.426	0	6	NUSAP1
CDK1	0	0.667737	0.761	0.417	0	6	CDK1
SNRPD11	0	0.658756	0.997	0.966	0	6	SNRPD1
KCNMA11	0	0.648657	0.933	0.659	0	6	KCNMA1
RAN2	0	0.641799	1	0.989	0	6	RAN
HSP90AA12	0	0.640126	1	0.994	0	6	HSP90AA1
DUT1	0	0.637913	0.95	0.784	0	6	DUT
ODC11	0	0.636323	0.981	0.887	0	6	ODC1
TUBB62	0	0.633363	0.983	0.854	0	6	TUBB6
SLC25A52	0	0.630411	0.989	0.947	0	6	SLC25A5
SRSF31	0	0.627439	0.98	0.782	0	6	SRSF3
ENO12	0	0.621387	0.999	0.984	0	6	ENO1
DNAJC9	0	0.620776	0.876	0.575	0	6	DNAJC9
SRSF71	0	0.617614	0.951	0.705	0	6	SRSF7
CCNB2	0	0.616639	0.739	0.47	0	6	CCNB2
CENPM	0	0.598339	0.78	0.415	0	6	CENPM
FBL1	0	0.590119	0.941	0.709	0	6	FBL
C1QBP1	0	0.585658	0.989	0.923	0	6	C1QBP
CACYBP1	0	0.584144	0.941	0.763	0	6	CACYBP
AURKA	0	0.581233	0.728	0.362	0	6	AURKA
CLSPN	0	0.574247	0.715	0.296	0	6	CLSPN
EIF5A3	0	0.572418	0.999	0.984	0	6	EIF5A
CDCA3	0	0.569325	0.719	0.448	0	6	CDCA3
FOSL11	0	0.56818	0.892	0.681	0	6	FOSL1
CENPA	0	0.568084	0.788	0.46	0	6	CENPA
PRR11	0	0.563113	0.768	0.4	0	6	PRR11
SSRP11	0	0.561207	0.905	0.637	0	6	SSRP1
FABP52	0	0.560317	0.988	0.932	0	6	FABP5
CENPV2	0	0.548355	0.919	0.785	0	6	CENPV
NASP1	0	0.548014	0.861	0.486	0	6	NASP
MAD2L1	0	0.543433	0.75	0.41	0	6	MAD2L1
MANF3	0	0.542364	0.979	0.885	0	6	MANF
SPDL1	0	0.54205	0.832	0.434	0	6	SPDL1
RNASEH2A1	0	0.540352	0.792	0.512	0	6	RNASEH2A
SRGN1	0	0.540336	0.952	0.769	0	6	SRGN
EBNA1BP22	0	0.538991	0.97	0.874	0	6	EBNA1BP2
HIST1H1D	0	0.536386	0.672	0.454	0	6	HIST1H1D
PARP11	0	0.536154	0.947	0.766	0	6	PARP1
ZWINT	0	0.535574	0.759	0.312	0	6	ZWINT
STOML21	0	0.534979	0.971	0.857	0	6	STOML2
AURKB	0	0.527678	0.708	0.411	0	6	AURKB
CENPN2	0	0.523322	0.772	0.454	0	6	CENPN
LYPD12	0	0.522942	0.929	0.822	0	6	LYPD1
MT1E1	0	0.522548	1	0.989	0	6	MT1E
CCT52	0	0.521294	0.948	0.735	0	6	CCT5
CKAP2	0	0.519244	0.774	0.419	0	6	CKAP2
S100A21	0	0.515163	0.935	0.773	0	6	S100A2
PSAT11	0	0.513849	0.937	0.612	0	6	PSAT1
HSPE12	0	0.509855	0.985	0.903	0	6	HSPE1
UBE2T	0	0.508705	0.76	0.431	0	6	UBE2T
TIMM10	0	0.508255	0.964	0.885	0	6	TIMM10
EIF52	0	0.505918	0.987	0.948	0	6	EIF5
CYCS3	0	0.504375	0.978	0.87	0	6	CYCS
GINS2	0	0.504129	0.719	0.486	0	6	GINS2
NUDT12	0	0.499061	0.896	0.71	0	6	NUDT1
PHGDH1	0	0.497282	0.907	0.604	0	6	PHGDH
KPNA21	0	0.494121	0.825	0.503	0	6	KPNA2
LDHA2	0	0.490526	0.995	0.955	0	6	LDHA
RAD23A2	0	0.486688	0.956	0.839	0	6	RAD23A
HSPA82	0	0.485925	0.984	0.905	0	6	HSPA8
RPA31	0	0.485697	0.841	0.572	0	6	RPA3
PBK	0	0.484191	0.689	0.442	0	6	PBK
HSPA52	0	0.484048	0.965	0.85	0	6	HSPA5
CCNA2	0	0.483767	0.675	0.456	0	6	CCNA2
CENPH1	0	0.48367	0.774	0.516	0	6	CENPH
USP1	0	0.482946	0.758	0.411	0	6	USP1
NT5C1	0	0.474973	0.945	0.771	0	6	NT5C
CCT22	0	0.473421	0.966	0.837	0	6	CCT2
CEP55	0	0.471931	0.69	0.367	0	6	CEP55
SDF2L12	0	0.469745	0.976	0.898	0	6	SDF2L1
TMPO	0	0.467257	0.763	0.394	0	6	TMPO
STMN12	0	0.467051	0.997	0.957	0	6	STMN1
DDX39A1	0	0.465106	0.801	0.492	0	6	DDX39A
MRPL151	0	0.464246	0.876	0.692	0	6	MRPL15
ILF22	0	0.460238	0.874	0.626	0	6	ILF2
ATAD2	0	0.458524	0.699	0.361	0	6	ATAD2
HSP90AB12	0	0.456783	0.998	0.99	0	6	HSP90AB1
HMGB3	0	0.455682	0.806	0.544	0	6	HMGB3
ANXA31	0	0.454822	0.961	0.871	0	6	ANXA3
TRIP13	0	0.450509	0.707	0.337	0	6	TRIP13
RRM2	0	0.449083	0.665	0.439	0	6	RRM2
GMNN	0	0.447069	0.727	0.44	0	6	GMNN
HMMR	0	0.445426	0.673	0.317	0	6	HMMR
LYAR1	0	0.441174	0.807	0.57	0	6	LYAR
CYC12	0	0.440526	0.971	0.901	0	6	CYC1
PFDN23	0	0.43968	0.996	0.957	0	6	PFDN2
MRPL122	0	0.439016	0.975	0.898	0	6	MRPL12
RPL39L	0	0.438625	0.77	0.398	0	6	RPL39L
PLAUR2	0	0.437849	0.958	0.838	0	6	PLAUR
PRMT11	0	0.435468	0.951	0.868	0	6	PRMT1
LY6K1	0	0.435299	0.762	0.624	0	6	LY6K
CENPK	0	0.433291	0.685	0.379	0	6	CENPK
BUB3	0	0.432832	0.862	0.664	0	6	BUB3
LDHB2	0	0.430008	0.998	0.985	0	6	LDHB
SMC31	0	0.429953	0.805	0.572	0	6	SMC3
GNG111	0	0.429163	0.967	0.888	0	6	GNG11
NUF2	0	0.423575	0.717	0.465	0	6	NUF2
PAICS2	0	0.423074	0.81	0.491	0	6	PAICS
GGH2	0	0.42065	0.942	0.759	0	6	GGH
SMC2	0	0.420097	0.756	0.437	0	6	SMC2
GALE1	0	0.41946	0.919	0.752	0	6	GALE
RGS102	0	0.418783	0.98	0.906	0	6	RGS10
PSMG11	0	0.414327	0.799	0.599	0	6	PSMG1
ARHGAP181	0	0.413752	0.879	0.688	0	6	ARHGAP18
TFPI23	0	0.413318	0.88	0.705	0	6	TFPI2
SRM3	0	0.413301	0.986	0.939	0	6	SRM
SIGLEC151	0	0.408481	0.945	0.756	0	6	SIGLEC15
RRP7A2	0	0.40765	0.868	0.74	0	6	RRP7A
CCDC341	0	0.406062	0.772	0.537	0	6	CCDC34
NME13	0	0.402618	0.993	0.958	0	6	NME1
BCL2L12	0	0.402542	0.766	0.557	0	6	BCL2L12
C19orf481	0	0.401625	0.812	0.596	0	6	C19orf48
SMAGP1	0	0.401314	0.839	0.667	0	6	SMAGP
GPATCH41	0	0.401208	0.903	0.728	0	6	GPATCH4
MTHFD22	0	0.40017	0.925	0.677	0	6	MTHFD2
COMMD41	0	0.400036	0.86	0.731	0	6	COMMD4
RUVBL11	0	0.399155	0.867	0.686	0	6	RUVBL1
CTNNAL11	0	0.395418	0.905	0.679	0	6	CTNNAL1
[truncated: 524 more rows]

## Sheet: Supplemental_Table_S4
Gene_ID	symbol	W1	W6	W2	G1	G2	G2_vs_G1_log2FoldChange	G2_vs_G1_Pvalue	G2_vs_G1_FDR	chr	Start	End
ENSG00000133110	POSTN	3.77994	1.2142	13.9222	2.49707	13.9222	11.4251	4.69e-60	2.06e-56	13	37562582	37598844
ENSG00000168542	COL3A1	3.97232	4.28405	14.5745	4.12819	14.5745	10.4464	2.19e-118	3.84e-114	2	188974319	189012746
ENSG00000109193	SULT1E1	0	0	10.4327	0	10.4327	10.4327	6.3e-36	1e-32	4	69810779	69860152
ENSG00000164107	HAND2	0.985302	0	10.5848	0.492651	10.5848	10.0921	1.28e-37	2.8e-34	4	173524968	173530229
ENSG00000087116	ADAMTS2	1.56533	0	10.6342	0.782666	10.6342	9.85149	2.9e-37	5.65e-34	5	179110850	179345430
ENSG00000211772	TRBC2	3.14369	3.5312	12.9937	3.33744	12.9937	9.65627	5.07e-81	2.96e-77	7	142801040	142802748
ENSG00000154864	PIEZO2	0	0	9.49333	0	9.49333	9.49333	2.21e-24	1.21e-21	18	10666482	11148762
ENSG00000102755	FLT1	2.56038	5.29586	13.3168	3.92812	13.3168	9.38869	1.32e-22	6.59e-20	13	28300343	28495128
ENSG00000185532	PRKG1	1.56533	0	9.974	0.782666	9.974	9.19134	4.35e-28	3.32e-25	10	50991357	52298350
ENSG00000133101	CCNA1	1.9779	1.86404	10.9372	1.92097	10.9372	9.01628	2.41e-42	6.03e-39	13	36431519	36442882
ENSG00000164692	COL1A2	5.10059	7.88254	15.4033	6.49156	15.4033	8.91171	0.000529546	0.015301	7	94394560	94431232
ENSG00000137573	SULF1	0.985302	4.55103	11.4889	2.76817	11.4889	8.72073	0.0285116	0.277045	8	69466623	69660915
ENSG00000125538	IL1B	7.23743	4.46741	14.568	5.85242	14.568	8.71555	8.34e-18	2.93e-15	2	112829750	112836903
ENSG00000100739	BDKRB1	0.985302	2.31045	10.2008	1.64788	10.2008	8.55289	1.99e-29	1.84e-26	14	96255823	96268967
ENSG00000161281	COX7A1	1.56533	2.31045	10.4367	1.93789	10.4367	8.49883	1e-33	1.1e-30	19	36150921	36152869
ENSG00000185052	SLC24A3	0	1.86404	9.41533	0.93202	9.41533	8.48331	1.15e-20	5.47e-18	20	19212645	19722937
ENSG00000154175	ABI3BP	1.56533	4.07395	11.1236	2.81964	11.1236	8.30397	6.31e-20	2.7e-17	3	100749155	100993515
ENSG00000139970	RTN1	0.985302	2.65088	10.1008	1.81809	10.1008	8.28272	9.58e-26	6e-23	14	59595975	59870966
ENSG00000157404	KIT	0	1.2142	8.77381	0.607102	8.77381	8.16671	7.33e-17	2.34e-14	4	54657917	54740715
ENSG00000117069	ST6GALNAC5	4.43124	2.92612	11.8307	3.67868	11.8307	8.15202	6.28e-35	8.47e-32	1	76867440	77065711
ENSG00000184937	WT1	0	0	8.13999	0	8.13999	8.13999	1.96e-13	4.3e-11	11	32387774	32435630
ENSG00000163206	SMCP	0	1.2142	8.67772	0.607102	8.67772	8.07061	4e-16	1.15e-13	1	152878316	152885047
ENSG00000227824	AC122136.2	0	0	7.93738	0	7.93738	7.93738	2.9e-12	5.35e-10	2	215869922	215870518
ENSG00000100234	TIMP3	8.80341	9.46072	17.0401	9.13206	17.0401	7.90802	1.25e-81	1.09e-77	22	32801700	32863043
ENSG00000103489	XYLT1	0.985302	3.15717	9.95857	2.07123	9.95857	7.88734	8.91e-19	3.47e-16	16	17101768	17470881
ENSG00000183715	OPCML	0	1.86404	8.70823	0.93202	8.70823	7.77621	1.54e-14	3.92e-12	11	132414976	133532519
ENSG00000175899	A2M	0	0	7.72831	0	7.72831	7.72831	3.65e-11	5.87e-09	12	9067663	9116229
ENSG00000253163	RP11-443C10.1	0	0	7.6112	0	7.6112	7.6112	1.36e-10	2.01e-08	5	179377530	179378761
ENSG00000261227	AC140912.1	0	0	7.604	0	7.604	7.604	1.47e-10	2.14e-08	16	73232054	73233970
ENSG00000235563	RP11-334A14.8	0	0	7.5895	0	7.5895	7.5895	1.73e-10	2.44e-08	1	53114575	53118609
ENSG00000241794	SPRR2A	0	0	7.42778	0	7.42778	7.42778	9.26e-10	1.23e-07	1	153056112	153057537
ENSG00000124212	PTGIS	3.5579	4.63007	11.4869	4.09399	11.4869	7.39296	1.32e-34	1.66e-31	20	49503873	49568146
ENSG00000227115	RP11-267C16.1	0	0	7.33523	0	7.33523	7.33523	2.28e-09	2.8e-07	18	51346248	51643939
ENSG00000271503	CCL5	4.72644	5.97833	12.6279	5.35239	12.6279	7.27556	6.26e-32	6.1e-29	17	35871490	35880793
ENSG00000237125	HAND2-AS1	0.985302	2.31045	8.92003	1.64788	8.92003	7.27215	8.7e-16	2.38e-13	4	173527269	173591324
ENSG00000137033	IL33	1.56533	0	7.99902	0.782666	7.99902	7.21635	5.2e-11	8e-09	9	6215785	6257983
ENSG00000248663	LINC00992	0	0	7.18903	0	7.18903	7.18903	8.69e-09	9.71e-07	5	117415508	117546298
ENSG00000229981	LINC01435	0	2.92612	8.6039	1.46306	8.6039	7.14084	6e-08	5.48e-06	10	107694972	108197849
ENSG00000203786	KPRP	0	0	7.06876	0	7.06876	7.06876	2.43e-08	2.41e-06	1	152759560	152762052
ENSG00000171724	VAT1L	0	0	7.0477	0	7.0477	7.0477	2.89e-08	2.79e-06	16	77788529	77980107
ENSG00000173114	LRRN3	2.29834	3.82795	10.0802	3.06314	10.0802	7.01707	3.5e-19	1.43e-16	7	111091005	111125454
ENSG00000004468	CD38	0.985302	1.2142	8.07903	1.09975	8.07903	6.97928	2.52e-12	4.81e-10	4	15778274	15853230
ENSG00000180739	S1PR5	0.985302	0	7.46001	0.492651	7.46001	6.96736	2.17e-09	2.7e-07	19	10512741	10517931
ENSG00000114948	ADAM23	3.14369	5.29586	11.1797	4.21977	11.1797	6.95996	6.7e-15	1.78e-12	2	206443538	206621130
ENSG00000170054	SERPINA9	0.985302	2.31045	8.6039	1.64788	8.6039	6.95602	1.75e-13	3.93e-11	14	94462716	94479689
ENSG00000117152	RGS4	7.44635	10.337	15.8325	8.89166	15.8325	6.94084	0.00253639	0.0509219	1	163068774	163076802
ENSG00000120279	MYCT1	0	2.31045	8.04224	1.15523	8.04224	6.88702	1.35e-08	1.42e-06	6	152697894	152724567
ENSG00000183242	WT1-AS	0	0	6.86717	0	6.86717	6.86717	1.19e-07	1.02e-05	11	32435517	32458769
ENSG00000264067	RP11-401O9.3	0	0	6.8551	0	6.8551	6.8551	1.31e-07	1.1e-05	17	10320391	10341458
ENSG00000138650	PCDH10	4.72644	7.17885	12.73	5.95265	12.73	6.77734	1.45e-12	2.82e-10	4	133149314	133208606
ENSG00000156466	GDF6	4.77887	5.60064	11.9614	5.18976	11.9614	6.7716	3.21e-36	5.64e-33	8	96142329	96160792
ENSG00000176049	JAKMIP2	0	0	6.75472	0	6.75472	6.75472	2.71e-07	2.13e-05	5	147585438	147782848
ENSG00000078098	FAP	2.97418	4.70501	10.593	3.83959	10.593	6.75337	4.94e-17	1.63e-14	2	162170683	162245151
ENSG00000144891	AGTR1	0	0	6.71521	0	6.71521	6.71521	3.57e-07	2.69e-05	3	148697783	148743008
ENSG00000108387	2019-09-04	3.4326	2.31045	9.5857	2.87152	9.5857	6.71418	5.43e-18	1.94e-15	17	58520249	58540818
ENSG00000179097	HTR1F	0	0	6.70179	0	6.70179	6.70179	3.92e-07	2.88e-05	3	87990695	87993835
ENSG00000183783	KCTD8	0	0	6.68825	0	6.68825	6.68825	4.31e-07	3.09e-05	4	44173908	44448807
ENSG00000157782	CABP1	0	1.86404	7.604	0.93202	7.604	6.67198	2.64e-08	2.59e-06	12	120640551	120667324
ENSG00000269113	TRABD2B	0	0	6.66077	0	6.66077	6.66077	5.19e-07	3.6e-05	1	47760527	47996895
ENSG00000148671	ADIRF	7.75849	4.46741	12.7677	6.11295	12.7677	6.65475	0.00849932	0.124456	10	86968191	86983934
ENSG00000213863	XX-C2158C12.2	0	0	6.63277	0	6.63277	6.63277	6.26e-07	4.23e-05	6	170725196	170728488
ENSG00000111339	ART4	0.985302	3.35627	8.7512	2.17079	8.7512	6.58041	7.53e-09	8.53e-07	12	14825568	14843495
ENSG00000080573	COL5A3	0.985302	0	7.0477	0.492651	7.0477	6.55505	8.49e-08	7.48e-06	19	9959560	10010471
ENSG00000267280	TBX2-AS1	1.9779	1.86404	8.46785	1.92097	8.46785	6.54688	1.27e-13	2.89e-11	17	61393455	61411555
ENSG00000163207	IVL	0	0	6.53023	0	6.53023	6.53023	1.22e-06	7.62e-05	1	152908544	152911886
ENSG00000162706	CADM3	0	1.2142	7.13015	0.607102	7.13015	6.52305	8.07e-08	7.18e-06	1	159171608	159203313
ENSG00000114771	AADAC	0	0	6.51496	0	6.51496	6.51496	1.34e-06	8.24e-05	3	151814036	151828488
ENSG00000121068	TBX2	0.985302	2.92612	8.46785	1.95571	8.46785	6.51214	8.02e-10	1.07e-07	17	61399895	61409466
ENSG00000172399	MYOZ2	3.14369	2.31045	9.19602	2.72707	9.19602	6.46895	3.1e-16	9.23e-14	4	119135783	119187789
ENSG00000103241	FOXF1	0	1.86404	7.3525	0.93202	7.3525	6.42048	2.51e-07	2e-05	16	86510526	86515418
ENSG00000137727	ARHGAP20	0	1.86404	7.34389	0.93202	7.34389	6.41187	2.7e-07	2.13e-05	11	110577041	110713189
ENSG00000115380	EFEMP1	4.82946	3.95619	10.8031	4.39282	10.8031	6.41028	2.04e-25	1.19e-22	2	55865966	55924139
ENSG00000154654	NCAM2	1.56533	2.31045	8.3351	1.93789	8.3351	6.39721	2.74e-12	5.11e-10	21	20998314	21543329
ENSG00000179136	LINC00670	1.56533	0	7.17938	0.782666	7.17938	6.39672	2.05e-07	1.68e-05	17	12549781	12642854
ENSG00000151952	TMEM132D	0	0	6.38668	0	6.38668	6.38668	2.94e-06	0.000164662	12	129071724	129903666
ENSG00000141052	MYOCD	4.05967	4.28405	10.5049	4.17186	10.5049	6.33307	1.06e-28	8.45e-26	17	12665889	12768949
ENSG00000116132	PRRX1	1.56533	3.95619	9.08672	2.76076	9.08672	6.32596	1.71e-08	1.73e-06	1	170662727	170739419
ENSG00000127241	MASP1	0	1.86404	7.25482	0.93202	7.25482	6.3228	5.53e-07	3.78e-05	3	187217284	187292022
ENSG00000230630	DNM3OS	0	2.31045	7.46796	1.15523	7.46796	6.31273	2.26e-06	0.000129731	1	172136530	172144794
ENSG00000118137	APOA1	4.49531	5.24654	11.1712	4.87093	11.1712	6.30031	4.33e-29	3.8e-26	11	116835750	116837950
ENSG00000165495	PKNOX2	0	0	6.30029	0	6.30029	6.30029	4.84e-06	0.000259026	11	125164686	125433389
ENSG00000145681	HAPLN1	4.14203	6.12198	11.3935	5.13201	11.3935	6.26153	3.41e-13	7.03e-11	5	83637804	83721613
ENSG00000091972	CD200	4.29387	7.54796	12.1364	5.92092	12.1364	6.21552	3.5e-07	2.64e-05	3	112332346	112362812
ENSG00000168995	SIGLEC7	0	0	6.16994	0	6.16994	6.16994	9.91e-06	0.000481414	19	51142298	51153526
ENSG00000250103	RP11-380D23.2	0	0	6.16994	0	6.16994	6.16994	9.91e-06	0.000481414	4	110595512	110615458
ENSG00000100968	NFATC4	2.29834	3.5312	9.07636	2.91477	9.07636	6.16159	2.6e-13	5.5e-11	14	24365672	24379604
ENSG00000130226	DPP6	0	0	6.13043	0	6.13043	6.13043	1.22e-05	0.00057531	7	153887096	154894285
ENSG00000141338	ABCA8	1.56533	2.92612	8.37369	2.24573	8.37369	6.12796	1.68e-10	2.39e-08	17	68867291	68955392
ENSG00000104369	JPH1	0.985302	1.86404	7.55261	1.42467	7.55261	6.12794	6.54e-09	7.5e-07	8	74234699	74321328
ENSG00000170624	SGCD	0.985302	3.68719	8.46388	2.33625	8.46388	6.12764	2.66e-06	0.000152104	5	155870343	156767788
ENSG00000255479	RP11-672A2.6	0	0	6.11026	0	6.11026	6.11026	1.35e-05	0.000631621	11	76625461	76626834
ENSG00000234663	AC104820.2	0	1.2142	6.70179	0.607102	6.70179	6.09469	1.88e-06	0.000111394	2	181101931	181399559
ENSG00000164619	BMPER	3.4326	5.29586	10.4538	4.36423	10.4538	6.0896	2.58e-12	4.87e-10	7	33904910	34155872
ENSG00000254343	RP11-760H22.2	0	2.65088	7.41139	1.32544	7.41139	6.08595	3.78e-05	0.00159395	8	120052179	120056201
ENSG00000250038	RP11-180C1.1	0	1.2142	6.68825	0.607102	6.68825	6.08114	2.05e-06	0.0001209	4	28362278	28402864
ENSG00000109956	B3GAT1	0	0	6.06906	0	6.06906	6.06906	1.67e-05	0.000762209	11	134378503	134411918
ENSG00000162733	DDR2	5.52568	6.64399	12.1504	6.08484	12.1504	6.06556	2.31e-23	1.19e-20	1	162631372	162787400
ENSG00000246430	LINC00968	0	1.86404	6.99368	0.93202	6.99368	6.06166	3.71e-06	0.000205903	8	56496245	56559823
ENSG00000223609	HBD	4.43124	4.46741	10.4628	4.44933	10.4628	6.01348	4.84e-27	3.4e-24	11	5232677	5235370
ENSG00000153495	TEX29	3.29536	1.86404	8.59304	2.5797	8.59304	6.01334	1.96e-10	2.75e-08	13	111316183	111344249
ENSG00000131459	GFPT2	4.05967	5.3897	10.7356	4.72469	10.7356	6.01089	3.97e-17	1.34e-14	5	180300689	180353387
ENSG00000258998	RP11-398E10.1	3.5579	1.2142	8.36945	2.38605	8.36945	5.9834	4.6e-07	3.24e-05	14	44763156	44782829
ENSG00000124107	SLPI	4.29387	1.86404	9.05013	3.07896	9.05013	5.97117	1.77e-07	1.48e-05	20	45252238	45254564
ENSG00000179292	TMEM151A	3.14369	3.68719	9.35017	3.41544	9.35017	5.93473	1.41e-16	4.35e-14	11	66291869	66296664
ENSG00000205293	LINC01602	0.985302	2.31045	7.5822	1.64788	7.5822	5.93432	4.19e-08	3.97e-06	8	57978357	57984126
ENSG00000154258	ABCA9	0.985302	4.07395	8.45591	2.52963	8.45591	5.92628	4.87e-05	0.00201034	17	68974487	69061064
ENSG00000152315	KCNK13	0.985302	2.92612	7.86098	1.95571	7.86098	5.90527	3.15e-07	2.41e-05	14	90061764	90185857
ENSG00000276600	RAB7B	1.9779	0	6.86717	0.988948	6.86717	5.87822	1.19e-05	0.000564366	1	205976739	206003461
ENSG00000124839	RAB17	6.10016	3.5312	10.6691	4.81568	10.6691	5.85337	5.38e-08	4.96e-06	2	237574321	237601614
ENSG00000165682	CLEC1B	0	0	5.84327	0	5.84327	5.84327	4.95e-05	0.0020288	12	9985641	10013424
ENSG00000172137	CALB2	4.72644	2.31045	9.33938	3.51845	9.33938	5.82093	2.11e-07	1.72e-05	16	71358712	71390438
ENSG00000270131	KB-1043D8.8	0	0	5.81862	0	5.81862	5.81862	5.54e-05	0.00221647	8	96140571	96140944
ENSG00000225968	ELFN1	1.56533	3.15717	8.1744	2.36125	8.1744	5.81315	1.5e-08	1.55e-06	7	1688118	1747954
ENSG00000254532	RP11-624D11.2	1.56533	0	6.58971	0.782666	6.58971	5.80704	1.19e-05	0.000564366	11	30044057	30084343
ENSG00000237254	TRBV30	0	1.2142	6.40335	0.607102	6.40335	5.79625	1.16e-05	0.00055264	7	142812585	142813399
ENSG00000275226	LINC00547	0	1.2142	6.40335	0.607102	6.40335	5.79625	1.16e-05	0.00055264	13	37534939	37551536
ENSG00000133687	TMTC1	0	1.86404	6.71521	0.93202	6.71521	5.78319	2.11e-05	0.00094865	12	29500839	29784759
ENSG00000253967	RP11-333A23.4	0	0	5.76802	0	5.76802	5.76802	6.93e-05	0.00263729	8	70471133	70485687
ENSG00000248698	LINC01085	1.56533	0	6.53023	0.782666	6.53023	5.74756	1.68e-05	0.000764956	4	14111967	14140052
ENSG00000163017	ACTG2	6.38019	7.24312	12.5538	6.81166	12.5538	5.74215	1.07e-26	7.22e-24	2	73892313	73919865
ENSG00000166317	SYNPO2L	4.67204	4.46741	10.3032	4.56973	10.3032	5.73343	1.16e-23	6.15e-21	10	73644880	73663803
ENSG00000145087	STXBP5L	0	0	5.71558	0	5.71558	5.71558	8.7e-05	0.00323424	3	120908071	121424761
ENSG00000169071	ROR2	0.985302	2.31045	7.36106	1.64788	7.36106	5.71319	2.85e-07	2.22e-05	9	91563090	91950162
ENSG00000173597	SULT1B1	3.5579	3.5312	9.25463	3.54455	9.25463	5.71008	4.55e-16	1.29e-13	4	69721161	69787961
ENSG00000173391	OLR1	3.4326	2.65088	8.72491	3.04174	8.72491	5.68317	6.21e-12	1.1e-09	12	10158300	10172138
ENSG00000233308	OSTN-AS1	4.21995	5.0876	10.2886	4.65377	10.2886	5.63488	2.35e-18	8.77e-16	3	191213290	191234605
ENSG00000106624	AEBP1	5.87784	2.65088	9.88628	4.26436	9.88628	5.62192	3.21e-05	0.00138112	7	44104360	44114562
ENSG00000180139	ACTA2-AS1	4.55666	2.65088	9.21031	3.60377	9.21031	5.60654	1.59e-08	1.62e-06	10	88932389	88940820
ENSG00000109072	VTN	3.29536	1.2142	7.84886	2.25478	7.84886	5.59407	2.74e-06	0.000155053	17	28367275	28373091
ENSG00000185477	GPRIN3	4.92561	2.65088	9.38207	3.78825	9.38207	5.59382	2.48e-07	1.99e-05	4	89236385	89308010
ENSG00000166922	SCG5	10.5479	8.61867	15.1759	9.58329	15.1759	5.59265	6.73e-12	1.18e-09	15	32641675	32697098
ENSG00000253802	CTA-392C11.1	1.9779	0	6.57507	0.988948	6.57507	5.58612	6.23e-05	0.00245354	8	40298740	40343402
ENSG00000155761	SPAG17	0.985302	1.2142	6.67458	1.09975	6.67458	5.57482	1.72e-06	0.000103528	1	117953860	118185223
ENSG00000229373	LINC00452	3.4326	3.5312	9.04217	3.4819	9.04217	5.56027	1.97e-14	4.92e-12	13	113888305	113923512
ENSG00000120156	TEK	1.56533	3.5312	8.10474	2.54826	8.10474	5.55648	8.54e-07	5.59e-05	9	27109140	27230175
ENSG00000077943	ITGA8	0	1.86404	6.48395	0.93202	6.48395	5.55193	7.36e-05	0.00277148	10	15513948	15720125
ENSG00000261742	LINC00922	0	0	5.54575	0	5.54575	5.54575	0.000175291	0.00600475	16	65284498	65576300
ENSG00000254703	SENCR	5.18071	5.29586	10.7689	5.23829	10.7689	5.53064	3.71e-27	2.71e-24	11	128691671	128696023
ENSG00000154096	THY1	8.69844	10.1333	14.9307	9.41586	14.9307	5.51486	2.36e-16	7.13e-14	11	119417377	119424985
ENSG00000026559	KCNG1	6.0153	7.04103	12.0388	6.52816	12.0388	5.51061	1.37e-20	6.34e-18	20	51003655	51023129
ENSG00000087303	NID2	2.29834	3.35627	8.32639	2.8273	8.32639	5.49908	1.2e-09	1.57e-07	14	52004802	52069228
ENSG00000127324	TSPAN8	3.29536	6.17566	10.1596	4.73551	10.1596	5.42414	8.96e-06	0.000442828	12	71125084	71441898
ENSG00000232524	RP11-332K15.1	0	2.92612	6.87914	1.46306	6.87914	5.41608	0.00167147	0.0376935	7	123456628	123459856
ENSG00000072952	MRVI1	6.07941	2.92612	9.90396	4.50276	9.90396	5.4012	5.25e-05	0.00211752	11	10573090	10693988
ENSG00000112319	EYA4	0	1.2142	6.00495	0.607102	6.00495	5.39785	8.94e-05	0.00331421	6	133240597	133532120
ENSG00000240497	RP11-185E8.1	5.32873	2.92612	9.52415	4.12743	9.52415	5.39672	1.44e-06	8.74e-05	3	171468083	171469633
ENSG00000152208	GRID2	0	2.65088	6.67458	1.32544	6.67458	5.34913	0.00110061	0.0271695	4	92303621	93774556
ENSG00000163359	COL6A3	6.67118	6.96685	12.1599	6.81901	12.1599	5.34092	3.02e-35	4.42e-32	2	237324002	237414375
ENSG00000167914	GSDMA	1.9779	0	6.31799	0.988948	6.31799	5.32904	0.000217857	0.00725046	17	39962972	39977766
ENSG00000142621	FHAD1	5.18071	3.5312	9.67938	4.35595	9.67938	5.32343	2.18e-09	2.7e-07	1	15247271	15400283
ENSG00000196565	HBG2	0.985302	2.92612	7.26398	1.95571	7.26398	5.30827	2.12e-05	0.000949769	11	5248273	5645789
ENSG00000172349	IL16	1.9779	2.92612	7.73492	2.45201	7.73492	5.28291	6.13e-08	5.57e-06	15	81159574	81314058
ENSG00000271811	RP1-79C4.4	0	0	5.28289	0	5.28289	5.28289	0.000467528	0.0137815	1	170667380	170669425
ENSG00000134853	PDGFRA	3.97232	3.68719	9.10976	3.82975	9.10976	5.28001	1.24e-13	2.86e-11	4	54229096	54298247
ENSG00000230027	RP11-550H2.2	0.985302	2.31045	6.92605	1.64788	6.92605	5.27818	6.67e-06	0.000341243	1	76041690	76066228
ENSG00000121898	CPXM2	0	1.2142	5.84327	0.607102	5.84327	5.23617	0.000183675	0.00627762	10	123706206	123940267
ENSG00000143995	MEIS1	0.985302	5.51993	8.47575	3.25262	8.47575	5.22314	0.0131711	0.169237	2	66433451	66573869
ENSG00000183578	TNFAIP8L3	1.56533	1.86404	6.93755	1.71469	6.93755	5.22286	1.22e-06	7.62e-05	15	51056597	51105276
ENSG00000227678	RP11-73O6.3	0.985302	1.86404	6.61856	1.42467	6.61856	5.19389	9.34e-06	0.000460296	6	130133409	130146179
ENSG00000232679	RP11-400N13.3	6.55573	7.4749	12.2079	7.01531	12.2079	5.19257	2.4e-20	1.08e-17	1	222041704	222064763
ENSG00000172935	MRGPRF	3.14369	3.68719	8.59667	3.41544	8.59667	5.18123	7.12e-11	1.09e-08	11	69004394	69013409
ENSG00000270321	RP11-2L8.2	0	1.86404	6.08981	0.93202	6.08981	5.15779	0.000444208	0.0132725	3	177954065	177959798
ENSG00000224846	RP1-90J20.8	5.49466	4.63007	10.1984	5.06237	10.1984	5.13601	5.65e-15	1.53e-12	6	2989721	2999134
ENSG00000204869	IGFL4	2.97418	3.5312	8.36945	3.25269	8.36945	5.11677	6.24e-10	8.42e-08	19	46039747	46077118
ENSG00000018236	CNTN1	3.14369	4.07395	8.70487	3.60882	8.70487	5.09605	6.08e-10	8.27e-08	12	40692441	41072418
ENSG00000261573	RP11-553K8.5	1.56533	3.5312	7.63962	2.54826	7.63962	5.09136	2.07e-05	0.000931458	1	198657552	198667061
ENSG00000136842	TMOD1	6.03699	4.37864	10.2864	5.20782	10.2864	5.07859	2.44e-09	2.97e-07	9	97501179	97601748
ENSG00000092068	SLC7A8	2.97418	2.92612	8.02618	2.95015	8.02618	5.07603	3.87e-09	4.55e-07	14	23125294	23183674
ENSG00000144057	ST6GAL2	2.56038	3.82795	8.25009	3.19417	8.25009	5.05593	8.23e-08	7.29e-06	2	106801599	106887108
ENSG00000163618	CADPS	0	1.2142	5.66116	0.607102	5.66116	5.05406	0.000387563	0.0117589	3	62398345	62875389
ENSG00000106123	EPHB6	4.21995	5.34354	9.82107	4.78175	9.82107	5.03933	9.92e-12	1.71e-09	7	142855060	142871094
ENSG00000173641	HSPB7	0.985302	2.65088	6.84293	1.81809	6.84293	5.02484	5.3e-05	0.00213124	1	16014027	16019594
ENSG00000114698	PLSCR4	0.985302	3.68719	7.3525	2.33625	7.3525	5.01626	0.000765811	0.020569	3	146192338	146251179
ENSG00000267328	AC002398.12	0	3.5312	6.76766	1.7656	6.76766	5.00206	0.0149668	0.184861	19	35754565	35755490
ENSG00000123388	HOXC11	2.56038	0	6.24587	1.28019	6.24587	4.96567	0.00238294	0.048997	12	53973125	53977643
ENSG00000173918	C1QTNF1	5.82895	7.20491	11.4682	6.51693	11.4682	4.95132	3.07e-12	5.61e-10	17	79022813	79049788
ENSG00000069011	PITX1	5.90168	4.37864	10.088	5.14016	10.088	4.94781	2.48e-09	3e-07	5	135027734	135034813
ENSG00000154553	PDLIM3	8.70523	7.5881	13.0795	8.14667	13.0795	4.93287	5.87e-16	1.63e-13	4	185500659	185535612
ENSG00000135547	HEY2	2.56038	0	6.2084	1.28019	6.2084	4.92821	0.00269378	0.0530261	6	125747663	125761269
ENSG00000189129	PLAC9	4.49531	4.18282	9.25922	4.33907	9.25922	4.92015	4.56e-13	9.2e-11	10	80131681	80145359
ENSG00000151468	CCDC3	3.29536	4.07395	8.6039	3.68466	8.6039	4.91924	1.26e-09	1.64e-07	10	12896624	13099652
ENSG00000165566	AMER2	0	2.31045	6.06906	1.15523	6.06906	4.91383	0.00239849	0.0490293	13	25161683	25172288
ENSG00000111341	MGP	2.56038	2.31045	7.33523	2.43542	7.33523	4.89981	5.44e-07	3.74e-05	12	14881180	14885926
ENSG00000168952	STXBP6	4.92561	5.19548	9.95998	5.06055	9.95998	4.89944	5.71e-17	1.85e-14	14	24809655	25050297
ENSG00000106031	HOXA13	0	1.86404	5.81862	0.93202	5.81862	4.8866	0.00125241	0.0301317	7	27193502	27200106
ENSG00000223812	RP11-197K6.1	1.56533	0	5.66116	0.782666	5.66116	4.8785	0.000910845	0.0237022	3	191557323	191590356
ENSG00000160013	PTGIR	3.97232	2.65088	8.18408	3.3116	8.18408	4.87248	5.19e-07	3.6e-05	19	46620467	46625118
ENSG00000160191	PDE9A	0.985302	4.84412	7.78667	2.91471	7.78667	4.87196	0.011203	0.151965	21	42653635	42775509
ENSG00000155792	DEPTOR	4.97138	5.74967	10.2221	5.36053	10.2221	4.86154	1.03e-14	2.69e-12	8	119873716	120050913
ENSG00000128052	KDR	0.985302	0	5.35323	0.492651	5.35323	4.86058	0.000803066	0.0213409	4	55078476	55125589
ENSG00000254839	AF131215.6	3.67319	1.2142	7.30004	2.4437	7.30004	4.85635	0.000535201	0.0154136	8	11062646	11067089
ENSG00000148204	CRB2	4.05967	2.31045	8.03691	3.18506	8.03691	4.85185	8.73e-06	0.00043357	9	123356169	123380324
ENSG00000230390	LINC01048	0.985302	1.2142	5.93787	1.09975	5.93787	4.83811	0.000103494	0.0037895	13	37481466	37484769
ENSG00000184985	SORCS2	3.14369	3.35627	8.04224	3.24998	8.04224	4.79226	1.39e-08	1.44e-06	4	7192537	7742836
ENSG00000198915	RASGEF1A	3.29536	1.2142	7.02634	2.25478	7.02634	4.77155	0.000314939	0.00998863	10	43194534	43266919
ENSG00000170579	DLGAP1	4.21995	6.7715	10.2603	5.49572	10.2603	4.7646	2.36e-05	0.00104762	18	3496031	4455335
ENSG00000107562	CXCL12	1.9779	1.2142	6.35274	1.59605	6.35274	4.75669	6.29e-05	0.00247453	10	44370164	44386493
ENSG00000149294	NCAM1	4.87834	7.20491	10.7657	6.04162	10.7657	4.72409	4.08e-06	0.000222909	11	112961246	113278436
ENSG00000223485	LINC01615	5.18071	5.60064	10.1097	5.39068	10.1097	4.71905	3.32e-16	9.72e-14	6	169158091	169162924
ENSG00000203434	RP11-163F15.1	4.72644	6.7715	10.4498	5.74897	10.4498	4.70085	8.84e-07	5.74e-05	10	108547974	108561815
ENSG00000229056	AC020571.3	1.9779	2.31045	6.84293	2.14417	6.84293	4.69876	8.09e-06	0.000405531	2	196260023	196264204
ENSG00000235200	RP11-393N21.2	0.985302	1.2142	5.79355	1.09975	5.79355	4.69379	0.000197999	0.00669114	1	67522346	67532612
ENSG00000153162	BMP6	0.985302	1.86404	6.11026	1.42467	6.11026	4.68559	0.000141422	0.00501091	6	7726796	7881422
ENSG00000187068	C3orf70	1.56533	2.65088	6.76766	2.10811	6.76766	4.65955	3.71e-05	0.00157115	3	185078049	185153014
ENSG00000251095	RP11-115D19.1	5.69894	6.03752	10.504	5.86823	10.504	4.63574	2.05e-18	7.82e-16	4	89551355	89726752
ENSG00000154118	JPH3	3.4326	3.95619	8.32639	3.69439	8.32639	4.632	1.1e-08	1.2e-06	16	87601834	87698156
ENSG00000149090	PAMR1	0.985302	3.5312	6.87914	2.25825	6.87914	4.62089	0.0021928	0.0461145	11	35431822	35530300
ENSG00000229613	LINC01501	0	1.86404	5.54575	0.93202	5.54575	4.61373	0.00309377	0.0590443	9	90463523	90582744
ENSG00000105605	CACNG7	3.14369	6.22742	9.29092	4.68555	9.29092	4.60537	0.00101783	0.025723	19	53909334	53943941
ENSG00000130294	KIF1A	5.36348	6.14907	10.3469	5.75628	10.3469	4.59064	1.15e-13	2.72e-11	2	240713763	240820308
ENSG00000255471	RP11-736K20.5	6.34585	6.00823	10.7633	6.17704	10.7633	4.58625	3.62e-19	1.44e-16	11	86892213	86925037
ENSG00000182326	C1S	4.67204	4.46741	9.13992	4.56973	9.13992	4.5702	1.36e-11	2.31e-09	12	6988258	7071032
ENSG00000185860	CCDC190	4.97138	4.84412	9.47373	4.90775	9.47373	4.56597	3.8e-13	7.74e-11	1	162824457	162868815
ENSG00000114812	VIPR1	1.9779	1.86404	6.48395	1.92097	6.48395	4.56298	3.8e-05	0.00159633	3	42489298	42537573
ENSG00000131634	TMEM204	4.29387	2.31045	7.85493	3.30216	7.85493	4.55277	0.000119316	0.0043148	16	1528687	1555580
ENSG00000121440	PDZRN3	0	3.35627	6.22726	1.67813	6.22726	4.54912	0.0292399	0.282102	3	73382432	73624940
ENSG00000158859	ADAMTS4	0.985302	1.2142	5.63316	1.09975	5.63316	4.53341	0.000388187	0.0117589	1	161184307	161199056
ENSG00000185737	NRG3	0.985302	0	5.00557	0.492651	5.00557	4.51292	0.00248558	0.0503633	10	81875313	82987179
ENSG00000132530	XAF1	3.4326	2.92612	7.68123	3.17936	7.68123	4.50188	7.76e-07	5.14e-05	17	6755446	6775647
ENSG00000175513	TSGA10IP	1.9779	0	5.48439	0.988948	5.48439	4.49544	0.00464497	0.0795169	11	65945444	65959963
ENSG00000255007	CTD-2589M5.4	1.9779	2.31045	6.60421	2.14417	6.60421	4.46003	3.58e-05	0.00152186	11	46256354	46274547
ENSG00000206432	TMEM200C	0.985302	2.92612	6.40335	1.95571	6.40335	4.44764	0.00122708	0.0296036	18	5882071	5895955
ENSG00000204397	CARD16	3.29536	3.15717	7.66058	3.22626	7.66058	4.43431	6.01e-07	4.07e-05	11	105041325	105101431
ENSG00000124191	TOX2	5.61491	4.84412	9.65522	5.22951	9.65522	4.42571	1.04e-10	1.56e-08	20	43914863	44069616
ENSG00000184845	DRD1	0	1.86404	5.35323	0.93202	5.35323	4.42121	0.00545457	0.0887567	5	175440038	175444208
ENSG00000164283	ESM1	0.985302	3.15717	6.46818	2.07123	6.46818	4.39695	0.00223906	0.0468835	5	54977863	55022671
ENSG00000178796	RIIAD1	1.56533	1.86404	6.11026	1.71469	6.11026	4.39558	0.000165091	0.00573371	1	151710432	151729805
ENSG00000169946	ZFPM2	3.5579	4.70501	8.5261	4.13145	8.5261	4.39465	5.46e-07	3.74e-05	8	104590732	105804532
ENSG00000138080	EMILIN1	1.9779	4.97099	7.86098	3.47444	7.86098	4.38654	0.00438872	0.0768944	2	27078566	27086408
ENSG00000080293	SCTR	0.985302	0	4.86819	0.492651	4.86819	4.37554	0.00368506	0.0671853	2	119439842	119525301
ENSG00000079102	RUNX1T1	0.985302	4.77624	7.24561	2.88077	7.24561	4.36484	0.0299545	0.28615	8	91954966	92103286
ENSG00000169026	MFSD7	1.9779	0	5.35323	0.988948	5.35323	4.36428	0.0067496	0.104577	4	681828	689441
ENSG00000251011	TMEM108-AS1	0	3.15717	5.93787	1.57858	5.93787	4.35928	0.0329902	0.300892	3	133246105	133257188
ENSG00000115318	LOXL3	7.68484	5.24654	10.8249	6.46569	10.8249	4.35923	5.11e-05	0.00208294	2	74532413	74555690
ENSG00000224000	RP3-471M13.2	3.5579	5.3897	8.82112	4.4738	8.82112	4.34732	2.38e-05	0.00105157	1	172906899	172907684
ENSG00000249669	CARMN	6.21877	6.06623	10.4806	6.1425	10.4806	4.33809	2.51e-17	8.64e-15	5	149406688	149428678
ENSG00000079841	RIMS1	2.78207	6.82287	9.13494	4.80247	9.13494	4.33247	0.0186448	0.211544	6	71886702	72403143
ENSG00000100024	UPB1	0.985302	3.15717	6.40335	2.07123	6.40335	4.33212	0.00277943	0.0545284	22	24494106	24528390
ENSG00000231971	RP11-557H15.3	3.29536	2.31045	7.13015	2.80291	7.13015	4.32724	3.97e-05	0.00166563	6	134428239	134520585
ENSG00000107796	ACTA2	11.8206	11.482	15.976	11.6513	15.976	4.32465	1.74e-32	1.79e-29	10	88935073	88991390
ENSG00000155465	SLC7A7	7.21858	7.74726	11.8011	7.48292	11.8011	4.31821	2.11e-19	8.81e-17	14	22773221	22829820
ENSG00000247416	RP11-629G13.1	0	3.15717	5.84327	1.57858	5.84327	4.26469	0.0390117	0.332633	11	112959278	112963460
ENSG00000152049	KCNE4	2.29834	3.68719	7.25482	2.99276	7.25482	4.26206	0.000100138	0.00368973	2	223051813	223198399
ENSG00000166387	PPFIBP2	3.14369	4.84412	8.25469	3.9939	8.25469	4.26079	4.9e-05	0.00201804	11	7513297	7657127
ENSG00000074181	NOTCH3	5.61491	5.63937	9.87437	5.62714	9.87437	4.24723	6.78e-14	1.63e-11	19	15159037	15200981
ENSG00000176165	FOXG1	0.985302	3.35627	6.40335	2.17079	6.40335	4.23257	0.0053258	0.08738	14	28765387	28770277
ENSG00000255866	RP11-221N13.2	5.61491	3.35627	8.68455	4.48559	8.68455	4.19897	0.000413185	0.0124303	12	65559590	65560889
ENSG00000138316	ADAMTS14	4.92561	5.34354	9.31756	5.13458	9.31756	4.18298	1.62e-10	2.32e-08	10	70672802	70762441
ENSG00000170775	GPR37	1.9779	5.19548	7.76748	3.58669	7.76748	4.18079	0.0115955	0.154657	7	124745996	124765627
ENSG00000184828	ZBTB7C	0.985302	2.31045	5.81862	1.64788	5.81862	4.17075	0.00149039	0.0345311	18	48026672	48410752
ENSG00000168675	LDLRAD4	2.97418	2.31045	6.79319	2.64232	6.79319	4.15087	8.68e-05	0.00323333	18	13217497	13652755
ENSG00000231133	HAR1B	0.985302	2.31045	5.79355	1.64788	5.79355	4.14567	0.00163223	0.037106	20	63095492	63102319
ENSG00000162595	DIRAS3	5.36348	4.77624	9.20556	5.06986	9.20556	4.1357	2.85e-09	3.43e-07	1	68045961	68051631
ENSG00000156427	FGF18	5.05879	6.06623	9.68621	5.56251	9.68621	4.1237	1.24e-08	1.31e-06	5	171419655	171457623
ENSG00000163520	FBLN2	8.02585	6.52495	11.3852	7.2754	11.3852	4.10977	8.04e-08	7.18e-06	3	13549130	13638422
ENSG00000088386	SLC15A1	2.29834	1.2142	5.81862	1.75627	5.81862	4.06235	0.00153259	0.0354151	13	98683800	98752654
ENSG00000253288	RP11-238K6.1	0	2.65088	5.38715	1.32544	5.38715	4.06171	0.032622	0.299021	8	137809443	138083570
ENSG00000142494	SLC47A1	1.56533	3.68719	6.67458	2.62626	6.67458	4.04831	0.00344903	0.0644909	17	19495384	19579034
ENSG00000254337	RP11-865I6.2	2.29834	5.85214	8.1149	4.07524	8.1149	4.03967	0.0225844	0.238455	8	68848741	68852763
ENSG00000168077	SCARA3	6.49434	2.31045	8.43579	4.40239	8.43579	4.0334	0.0498197	0.38226	8	27633867	27676776
ENSG00000186340	THBS2	5.21917	8.69418	10.9872	6.95667	10.9872	4.0305	0.00565347	0.09122	6	169215779	169254044
ENSG00000223949	ROR1-AS1	0.985302	3.15717	6.08981	2.07123	6.08981	4.01857	0.00721542	0.11014	1	64094441	64171297
ENSG00000176046	NUPR1	6.50993	8.9389	11.7376	7.72441	11.7376	4.01321	0.0001106	0.00403288	16	28532707	28539174
ENSG00000068831	RASGRP2	3.97232	4.07395	8.02079	4.02313	8.02079	3.99766	7.07e-07	4.7e-05	11	64726910	64745456
ENSG00000267013	CTD-2171N6.1	1.56533	1.2142	5.38715	1.38977	5.38715	3.99738	0.00180992	0.0399801	18	55105903	55124306
ENSG00000228630	HOTAIR	0.985302	0	4.48527	0.492651	4.48527	3.99262	0.00959366	0.136799	12	53962307	53974956
ENSG00000162692	VCAM1	4.43124	7.9534	10.1682	6.19232	10.1682	3.97589	0.00972648	0.137968	1	100719741	100739045
ENSG00000137960	GIPC2	3.87933	5.0876	8.45591	4.48346	8.45591	3.97245	9.43e-06	0.000463227	1	77979541	78138449
ENSG00000166979	EVA1C	3.4326	2.31045	6.84293	2.87152	6.84293	3.97141	0.00034449	0.0106561	21	32412005	32515397
ENSG00000176532	PRR15	4.72644	3.95619	8.29992	4.34132	8.29992	3.9586	2.1e-06	0.000123183	7	29563810	29567295
ENSG00000164093	PITX2	6.50993	7.89059	11.1578	7.20026	11.1578	3.95753	6.45e-08	5.84e-06	4	110617422	110642123
ENSG00000265096	C1QTNF1-AS1	2.97418	1.2142	6.048	2.09419	6.048	3.95381	0.00423949	0.0748053	17	79019208	79027655
ENSG00000163661	PTX3	8.28796	8.6522	12.4204	8.47008	12.4204	3.95033	9.86e-21	4.81e-18	3	157436788	157443628
ENSG00000020181	ADGRA2	5.87784	4.63007	9.19123	5.25396	9.19123	3.93727	2.81e-06	0.000158596	8	37784190	37844896
ENSG00000164161	HHIP	8.54039	8.58435	12.4967	8.56237	12.4967	3.93431	1.21e-24	6.83e-22	4	144646020	144745271
ENSG00000133019	CHRM3	3.14369	5.24654	8.11996	4.19512	8.11996	3.92484	0.00101581	0.0257089	1	239386564	239915452
ENSG00000250241	RP11-9G1.3	2.56038	5.29586	7.84886	3.92812	7.84886	3.92074	0.0071343	0.109092	4	133075310	133149116
ENSG00000160539	PLPP7	2.97418	2.92612	6.8551	2.95015	6.8551	3.90495	8.31e-05	0.00309991	9	131289693	131309262
ENSG00000231806	PCAT7	1.56533	3.15717	6.26424	2.36125	6.26424	3.90299	0.00238702	0.0489985	9	94555068	94568127
ENSG00000163531	NFASC	1.9779	5.0876	7.42778	3.53275	7.42778	3.89503	0.0198858	0.219105	1	204828650	205022822
ENSG00000153993	SEMA3D	3.14369	4.90895	7.90847	4.02632	7.90847	3.88216	0.000474821	0.0139496	7	84995552	85186855
ENSG00000258602	LINC01629	6.0153	3.95619	8.85181	4.98574	8.85181	3.86607	0.000532243	0.0153536	14	76959637	76965802
ENSG00000268894	PLCE1-AS1	5.49466	6.78882	10.0044	6.14174	10.0044	3.86263	5.98e-07	4.06e-05	10	94279276	94287478
ENSG00000130477	UNC13A	0	1.86404	4.76875	0.93202	4.76875	3.83673	0.0226074	0.238455	19	17601327	17688365
ENSG00000124920	MYRF	8.67096	8.26955	12.3031	8.47025	12.3031	3.83288	2.95e-18	1.08e-15	11	61752641	61788518
ENSG00000254303	RP11-398G24.2	1.9779	1.86404	5.74204	1.92097	5.74204	3.82107	0.00127961	0.0306337	8	121954639	122127184
ENSG00000122691	TWIST1	2.78207	6.70002	8.55996	4.74104	8.55996	3.81892	0.047035	0.371286	7	19020990	19117672
ENSG00000184115	RP13-1039J1.2	4.6155	6.96685	9.60925	5.79117	9.60925	3.81808	0.000813591	0.0214903	2	110402913	110435166
ENSG00000227517	LINC01483	3.4326	5.03047	8.04755	4.23153	8.04755	3.81602	0.000264543	0.00864027	17	69577250	69903000
ENSG00000248371	CTC-347C20.2	4.77887	4.46741	8.43579	4.62314	8.43579	3.81265	3.9e-07	2.87e-05	5	72574119	72660669
ENSG00000080031	PTPRH	4.72644	4.07395	8.208	4.4002	8.208	3.80781	3.81e-06	0.000210406	19	55181247	55209506
ENSG00000121904	CSMD2	2.56038	2.92612	6.54533	2.74325	6.54533	3.80208	0.000277314	0.00900704	1	33513998	34165842
ENSG00000132185	FCRLA	2.97418	1.2142	5.89135	2.09419	5.89135	3.79715	0.00690156	0.106323	1	161706971	161714352
ENSG00000107731	UNC5B	5.52568	5.9478	9.52605	5.73674	9.52605	3.78931	1.05e-09	1.38e-07	10	71212569	71302864
ENSG00000165124	SVEP1	6.95937	3.68719	9.10976	5.32328	9.10976	3.78648	0.0151194	0.18592	9	110365250	110579880
ENSG00000136010	ALDH1L2	3.77994	7.25564	9.29986	5.51779	9.29986	3.78207	0.0196688	0.217572	12	105019783	105084577
ENSG00000154188	ANGPT1	4.92561	5.81878	9.14489	5.3722	9.14489	3.77269	4.47e-07	3.16e-05	8	107249481	107498055
ENSG00000115474	KCNJ13	1.9779	1.86404	5.68863	1.92097	5.68863	3.76766	0.00157374	0.036128	2	232766463	232776568
ENSG00000123843	C4BPB	5.49466	3.15717	8.08937	4.32592	8.08937	3.76346	0.00362299	0.0663853	1	207088841	207099993
ENSG00000253628	RP11-536N17.1	1.9779	1.86404	5.66116	1.92097	5.66116	3.7402	0.00174675	0.0389278	5	172816620	172819958
ENSG00000269936	RP11-394O4.5	4.72644	4.63007	8.41539	4.67826	8.41539	3.73713	4.17e-07	3.02e-05	5	149430285	149432834
ENSG00000221866	PLXNA4	3.5579	1.2142	6.11026	2.38605	6.11026	3.72421	0.0171553	0.200591	7	132123331	132648688
ENSG00000124440	HIF3A	0.985302	0	4.21001	0.492651	4.21001	3.71736	0.0172186	0.201197	19	46297045	46343433
ENSG00000173546	CSPG4	6.07941	5.03047	9.26835	5.55494	9.26835	3.71341	2e-06	0.00011805	15	75674321	75712848
ENSG00000090539	CHRD	1.9779	1.86404	5.63316	1.92097	5.63316	3.7122	0.00193991	0.0419744	3	184380072	184390736
ENSG00000170571	EMB	6.67118	6.22742	10.1596	6.4493	10.1596	3.71035	4.83e-11	7.5e-09	5	50396191	50443248
ENSG00000276542	RP11-115D19.2	1.56533	1.86404	5.4203	1.71469	5.4203	3.70561	0.0027629	0.0542649	4	89748282	89749154
ENSG00000259436	CTC-378H22.2	0.985302	2.31045	5.35323	1.64788	5.35323	3.70535	0.00681132	0.105162	19	42152568	42157523
ENSG00000088053	GP6	3.77994	2.92612	7.05827	3.35303	7.05827	3.70524	0.000282034	0.00914343	19	55013704	55038264
ENSG00000104967	NOVA2	2.78207	5.34354	7.76748	4.0628	7.76748	3.70467	0.0085015	0.124456	19	45933733	45973546
ENSG00000153234	NR4A2	7.46247	3.82795	9.34802	5.64521	9.34802	3.70281	0.0305979	0.289555	2	156324431	156342348
ENSG00000101144	BMP7	2.29834	2.65088	6.16994	2.47461	6.16994	3.69533	0.000807726	0.0213676	20	57168747	57266629
ENSG00000224259	LINC01133	3.4326	5.14255	7.98247	4.28757	7.98247	3.69489	0.000679717	0.0186274	1	159961217	159984750
ENSG00000117586	TNFSF4	4.21995	7.5171	9.55058	5.86852	9.55058	3.68206	0.0158012	0.19008	1	173183733	173207313
ENSG00000231013	AC013275.2	2.97418	2.92612	6.61856	2.95015	6.61856	3.66841	0.00031373	0.00996831	2	119476447	119487346
ENSG00000258376	RP4-647C14.2	4.92561	2.31045	7.27308	3.61803	7.27308	3.65505	0.0150492	0.185356	14	73242650	73245979
ENSG00000281383	CH507-513H4.5	1.9779	1.86404	5.57548	1.92097	5.57548	3.65451	0.00239705	0.0490293	21	8254591	8255514
ENSG00000254202	RP11-120I21.2	0.985302	0	4.13212	0.492651	4.13212	3.63947	0.0200516	0.220354	8	83912712	84140283
ENSG00000081277	PKP1	6.55573	3.35627	8.5894	4.956	8.5894	3.6334	0.0229214	0.239867	1	201283451	201332993
ENSG00000007237	GAS7	5.43056	4.84412	8.75445	5.13734	8.75445	3.61711	9.48e-07	6.11e-05	17	9910608	10198551
ENSG00000144488	ESPNL	3.29536	1.2142	5.86751	2.25478	5.86751	3.61273	0.0165815	0.196396	2	238100156	238133287
ENSG00000119227	PIGZ	6.75208	5.03047	9.49916	5.89128	9.49916	3.60788	0.00015676	0.00547693	3	196946342	196969060
ENSG00000262003	RP11-676J12.7	2.78207	1.2142	5.60461	1.99813	5.60461	3.60648	0.00989341	0.139486	17	909631	911212
ENSG00000174004	NRROS	1.56533	1.86404	5.31849	1.71469	5.31849	3.6038	0.0038909	0.0700096	3	196639685	196662004
ENSG00000178031	ADAMTSL1	8.69844	7.46415	11.684	8.0813	11.684	3.60274	1.23e-07	1.04e-05	9	18473893	18910950
ENSG00000204644	ZFP57	6.27461	4.28405	8.87292	5.27933	8.87292	3.59358	0.0010679	0.0265672	6	29672391	29681110
ENSG00000170276	HSPB2	5.58577	4.18282	8.46388	4.8843	8.46388	3.57958	0.000183973	0.00627762	11	111912241	111914093
ENSG00000280614	CH507-513H4.4	1.56533	2.31045	5.5154	1.93789	5.5154	3.5775	0.00392721	0.070285	21	8393418	8394341
ENSG00000111962	UST	5.8536	7.78229	10.3946	6.81794	10.3946	3.57666	0.000155115	0.00544112	6	148747327	149076990
ENSG00000152422	XRCC4	9.50771	8.86729	12.7533	9.1875	12.7533	3.56585	2.41e-13	5.15e-11	5	83077497	83353787
ENSG00000186377	CYP4X1	3.14369	5.14255	7.7016	4.14312	7.7016	3.55848	0.00338385	0.0634074	1	47023567	47050751
ENSG00000140538	NTRK3	2.56038	4.63007	7.13015	3.59523	7.13015	3.53492	0.00693341	0.106671	15	87859750	88256768
ENSG00000177875	CCDC184	5.01575	5.19548	8.636	5.10562	8.636	3.53038	4.75e-07	3.33e-05	12	48183583	48185926
ENSG00000072041	SLC6A15	1.56533	2.65088	5.63316	2.10811	5.63316	3.52506	0.0052619	0.0865746	12	84859487	84913615
ENSG00000132321	IQCA1	6.58547	5.24654	9.42352	5.91601	9.42352	3.50752	3.36e-05	0.00143203	2	236324146	236507542
ENSG00000100626	GALNT16	3.14369	2.31045	6.22726	2.72707	6.22726	3.50019	0.00215147	0.0455732	14	69259276	69357033
ENSG00000204103	MAFB	2.29834	3.15717	6.22726	2.72775	6.22726	3.4995	0.00192576	0.0418536	20	40685847	40689240
ENSG00000175161	CADM2	1.9779	1.86404	5.4203	1.92097	5.4203	3.49933	0.00411518	0.073201	3	84958980	86074429
ENSG00000170458	CD14	3.4326	2.92612	6.67458	3.17936	6.67458	3.49522	0.000656298	0.0182133	5	140631727	140633701
ENSG00000121577	POPDC2	5.14121	5.14255	8.636	5.14188	8.636	3.49412	5.23e-07	3.61e-05	3	119636456	119665324
ENSG00000235448	LURAP1L-AS1	2.78207	3.68719	6.71521	3.23463	6.71521	3.48058	0.00100665	0.0255509	9	12700099	12814345
ENSG00000198523	PLN	1.56533	3.35627	5.93787	2.4608	5.93787	3.47707	0.0119349	0.157625	6	118548297	118560730
ENSG00000179954	SSC5D	5.82895	6.64399	9.70818	6.23647	9.70818	3.47171	2.31e-07	1.87e-05	19	55488403	55519098
ENSG00000240350	AC017002.1	4.14203	4.90895	7.98247	4.52549	7.98247	3.45698	5.08e-05	0.0020771	2	111491272	111570974
ENSG00000266441	RP11-91I8.3	3.87933	5.91661	8.34808	4.89797	8.34808	3.45011	0.0029196	0.0565924	18	6728820	6729862
ENSG00000228495	LINC01013	3.14369	5.34354	7.68123	4.24362	7.68123	3.43762	0.00771874	0.115907	6	132131914	132169374
ENSG00000163431	LMOD1	7.94785	7.04103	10.9243	7.49444	10.9243	3.42986	2.84e-08	2.75e-06	1	201896451	201946588
ENSG00000135324	MRAP2	2.78207	1.2142	5.4203	1.99813	5.4203	3.42216	0.0162668	0.193557	6	84033755	84090881
ENSG00000187479	C11orf96	2.78207	1.2142	5.4203	1.99813	5.4203	3.42216	0.0162668	0.193557	11	43925341	43944338
ENSG00000074370	ATP2A3	3.77994	1.2142	5.91479	2.49707	5.91479	3.41772	0.0435604	0.354856	17	3923869	3964464
ENSG00000281920	RP11-418H16.1	5.29313	5.47781	8.79924	5.38547	8.79924	3.41377	4.36e-07	3.11e-05	2	65623271	65628424
ENSG00000154479	CCDC173	2.97418	2.31045	6.048	2.64232	6.048	3.40569	0.00287396	0.0560071	2	169645424	169694433
ENSG00000278071	RP11-736N17.10	3.14369	2.65088	6.30029	2.89729	6.30029	3.40301	0.00164743	0.0373311	14	103208099	103208876
ENSG00000101115	SALL4	0.985302	2.31045	5.0486	1.64788	5.0486	3.40072	0.0155694	0.188715	20	51782330	51802520
ENSG00000184524	CEND1	6.43022	7.50666	10.3534	6.96844	10.3534	3.38492	8.73e-07	5.7e-05	11	787103	790123
ENSG00000157570	TSPAN18	1.9779	4.55103	6.64684	3.26447	6.64684	3.38237	0.0315717	0.294227	11	44726464	44932421
ENSG00000237181	AC147651.4	4.87834	3.68719	7.65363	4.28276	7.65363	3.37086	0.000710951	0.0193925	7	603184	608482
ENSG00000154721	JAM2	3.14369	5.67708	7.7803	4.41039	7.7803	3.36992	0.0169518	0.199071	21	25639271	25717562
ENSG00000232352	SEMA3B-AS1	2.78207	2.31045	5.91479	2.54626	5.91479	3.36854	0.00319713	0.060621	3	50266640	50267371
ENSG00000224132	AC112715.2	3.67319	2.65088	6.53023	3.16203	6.53023	3.36819	0.00261644	0.0520586	2	237257090	237257676
ENSG00000121966	CXCR4	4.49531	4.18282	7.68805	4.33907	7.68805	3.34899	6.83e-05	0.00262944	2	136114348	136118165
ENSG00000184005	ST6GALNAC3	6.61461	6.3952	9.85329	6.5049	9.85329	3.34838	1.72e-09	2.18e-07	1	76074718	76634601
ENSG00000224459	RP11-169K16.4	6.10016	3.15717	7.97691	4.62866	7.97691	3.34824	0.0340303	0.30671	1	15740050	15749896
ENSG00000105963	ADAP1	3.97232	6.34922	8.50308	5.16077	8.50308	3.34232	0.00857521	0.125125	7	897900	955407
ENSG00000259590	RP11-20G13.3	3.5579	1.86404	6.02664	2.71097	6.02664	3.31567	0.0145991	0.182115	15	99395178	99396593
ENSG00000151702	FLI1	6.0153	7.13887	9.8848	6.57708	9.8848	3.30771	6.85e-06	0.000348004	11	128686534	128813267
ENSG00000116183	PAPPA2	3.67319	4.07395	7.17938	3.87357	7.17938	3.30582	0.000317361	0.0100473	1	176463170	176845605
ENSG00000145861	C1QTNF2	5.21917	4.18282	8.00449	4.70099	8.00449	3.3035	0.000298386	0.00956745	5	160347750	160370641
ENSG00000140285	FGF7	6.25624	7.45333	10.1436	6.85478	10.1436	3.28883	8.07e-06	0.000405531	15	49423095	49488775
ENSG00000138411	HECW2	5.10059	6.17566	8.92581	5.63812	8.92581	3.28768	4.85e-05	0.00200491	2	196194369	196593692
ENSG00000105278	ZFR2	6.05835	5.14255	8.86692	5.60045	8.86692	3.26647	3.19e-05	0.00137729	19	3804023	3869032
ENSG00000257335	MGAM	3.14369	5.67708	7.6675	4.41039	7.6675	3.25711	0.0228475	0.239766	7	141907812	142106747
ENSG00000198865	CCDC152	2.78207	1.86404	5.57548	2.32305	5.57548	3.25243	0.00931998	0.133986	5	42756800	42802360
ENSG00000178860	MSC	8.58891	8.24465	11.6686	8.41678	11.6686	3.25183	3.4e-13	7.03e-11	8	71841548	71844468
ENSG00000123453	SARDH	3.87933	3.68719	7.02634	3.78326	7.02634	3.24307	0.000497388	0.0145153	9	133663559	133739955
ENSG00000113749	HRH2	2.29834	2.31045	5.54575	2.30439	5.54575	3.24136	0.00577439	0.0928296	5	175658029	175686242
ENSG00000175746	C15orf54	3.67319	1.86404	6.00495	2.76861	6.00495	3.23634	0.0204661	0.223648	15	39250683	39254845
ENSG00000166394	CYB5R2	7.21858	5.63937	9.66043	6.42897	9.66043	3.23146	0.000333851	0.010398	11	7665099	7677222
ENSG00000197614	MFAP5	7.73877	8.59916	11.3982	8.16897	11.3982	3.22926	1.98e-08	1.99e-06	12	8637345	8662888
ENSG00000144749	LRIG1	6.86552	5.9478	9.63242	6.40666	9.63242	3.22576	5.57e-06	0.000290783	3	66378796	66501263
ENSG00000137266	SLC22A23	5.32873	5.88473	8.82731	5.60673	8.82731	3.22058	5.13e-06	0.000272637	6	3268961	3457022
ENSG00000116574	RHOU	2.97418	3.5312	6.46818	3.25269	6.46818	3.2155	0.00197838	0.0426799	1	228735076	228746669
ENSG00000110675	ELMOD1	1.9779	2.92612	5.66116	2.45201	5.66116	3.20916	0.00847997	0.124456	11	107591090	107666779
ENSG00000166963	MAP1A	10.0312	12.599	14.5227	11.3151	14.5227	3.20755	0.0030007	0.0577709	15	43510957	43531620
ENSG00000162078	ZG16B	7.38002	5.67708	9.71821	6.52855	9.71821	3.18966	0.000660741	0.0182811	16	2830168	2839585
ENSG00000091592	NLRP1	10.328	11.0747	13.8793	10.7013	13.8793	3.17793	1.45e-10	2.12e-08	17	5499426	5619424
ENSG00000198598	MMP17	3.67319	5.47781	7.74803	4.5755	7.74803	3.17253	0.00582501	0.0933865	12	131828392	131851783
ENSG00000164483	SAMD3	4.77887	6.78882	8.95438	5.78385	8.95438	3.17053	0.00388344	0.0700017	6	130144314	130365425
ENSG00000116774	OLFML3	7.82233	7.04103	10.6002	7.43168	10.6002	3.16853	1.34e-07	1.12e-05	1	113979390	114035572
ENSG00000266010	GATA6-AS1	8.06859	8.11326	11.2419	8.09092	11.2419	3.15096	2.11e-13	4.57e-11	18	22166897	22168968
ENSG00000259448	RP11-16E12.1	3.4326	3.82795	6.78048	3.63027	6.78048	3.15021	0.00120136	0.0290629	15	31216019	31224445
ENSG00000170961	HAS2	5.21917	7.46415	9.48747	6.34166	9.48747	3.14582	0.00566894	0.0913857	8	121612115	121641390
ENSG00000118407	FILIP1	8.50581	8.32998	11.5622	8.41789	11.5622	3.1443	1.22e-13	2.85e-11	6	75291858	75493738
ENSG00000267175	RP11-879F14.1	6.49434	6.09437	9.43371	6.29436	9.43371	3.13935	3.82e-07	2.82e-05	18	61592374	61748832
ENSG00000157873	TNFRSF14	3.4326	4.28405	6.98262	3.85832	6.98262	3.1243	0.00173773	0.0387761	1	2555638	2565382
ENSG00000120899	PTK2B	5.49466	6.3952	9.06854	5.94493	9.06854	3.12361	3.05e-05	0.0013285	8	27311481	27459391
ENSG00000130635	COL5A1	11.1113	10.4958	13.9251	10.8035	13.9251	3.12157	2.45e-11	4.02e-09	9	134641773	134844843
ENSG00000088881	EBF4	1.56533	3.68719	5.74204	2.62626	5.74204	3.11578	0.0413572	0.345412	20	2692877	2760108
ENSG00000172508	CARNS1	3.5579	3.15717	6.46818	3.35753	6.46818	3.11065	0.00250122	0.0505446	11	67414967	67425607
ENSG00000166743	ACSM1	4.05967	4.46741	7.36957	4.26354	7.36957	3.10603	0.000418062	0.0125555	16	20623236	20698890
ENSG00000140092	FBLN5	5.58577	6.17566	8.98516	5.88072	8.98516	3.10444	7.09e-06	0.000359166	14	91869411	91947987
ENSG00000141469	SLC14A1	6.97069	8.83012	10.983	7.9004	10.983	3.08262	0.000637667	0.0178945	18	45724126	45752520
ENSG00000236546	RP1-118J21.5	7.37151	5.19548	9.35017	6.2835	9.35017	3.06668	0.00704676	0.108038	1	39897744	39899098
ENSG00000198873	GRK5	7.95925	6.64399	10.364	7.30162	10.364	3.06243	6.72e-05	0.00261234	10	119207588	119459742
ENSG00000123610	TNFAIP6	6.05835	5.43443	8.80865	5.74639	8.80865	3.06226	2.38e-05	0.00105157	2	151357591	151380048
ENSG00000104059	FAM189A1	5.82895	5.60064	8.77702	5.7148	8.77702	3.06222	5.3e-06	0.000279076	15	29120253	29570723
ENSG00000175274	TP53I11	6.58547	7.2305	9.96701	6.90798	9.96701	3.05903	3.98e-07	2.91e-05	11	44885902	44951306
ENSG00000182253	SYNM	7.37151	7.15232	10.3175	7.26191	10.3175	3.05561	1.5e-09	1.93e-07	15	99098216	99135593
ENSG00000112902	SEMA5A	6.31067	8.46006	10.4387	7.38537	10.4387	3.05337	0.00315819	0.0599476	5	9035025	9546075
ENSG00000101335	MYL9	14.5449	15.3554	17.9922	14.9501	17.9922	3.04203	1.75e-11	2.9e-09	20	36541483	36551447
ENSG00000156711	MAPK13	6.62896	5.78464	9.2431	6.2068	9.2431	3.0363	2.91e-05	0.00127239	6	36127808	36144524
ENSG00000106366	SERPINE1	13.9933	14.8118	17.4271	14.4025	17.4271	3.02463	3.75e-11	5.97e-09	7	101127088	101139266
ENSG00000112964	GHR	3.14369	5.14255	7.15989	4.14312	7.15989	3.01677	0.0195715	0.217266	5	42423776	42721878
ENSG00000164171	ITGA2	10.402	10.5386	13.4856	10.4703	13.4856	3.01528	1.36e-16	4.25e-14	5	52989325	53094779
ENSG00000281181	CH507-513H4.3	2.29834	2.31045	5.31849	2.30439	5.31849	3.01409	0.011839	0.156594	21	8437628	8438551
ENSG00000091986	CCDC80	13.2142	14.3287	16.7765	13.7715	16.7765	3.00505	5.28e-08	4.9e-06	3	112596793	112649530
ENSG00000173926	2019-03-03	9.50577	9.06159	12.2881	9.28368	12.2881	3.00439	1.67e-11	2.79e-09	5	126867713	127030808
ENSG00000177627	C12orf54	4.87834	5.29586	8.07903	5.0871	8.07903	2.99193	0.000112696	0.00410079	12	48482502	48496512
ENSG00000115232	ITGA4	6.43022	6.12198	9.25003	6.2761	9.25003	2.97392	1.72e-06	0.000103375	2	181457201	181536187
ENSG00000177096	FAM109B	3.29536	4.28405	6.75472	3.78971	6.75472	2.96502	0.00479607	0.0812099	22	42074250	42079441
ENSG00000185112	FAM43A	9.64291	10.7863	13.1773	10.2146	13.1773	2.9627	1.7e-06	0.000103138	3	194686543	194689037
ENSG00000170271	FAXDC2	5.8536	6.12198	8.94016	5.98779	8.94016	2.95237	5.23e-06	0.000276468	5	154818490	154859252
ENSG00000182752	PAPPA	11.9086	13.6438	15.7268	12.7762	15.7268	2.95059	0.000129227	0.00465402	9	116153803	116402322
ENSG00000232640	RP1-266L20.2	3.77994	1.86404	5.76802	2.82199	5.76802	2.94603	0.0452497	0.362556	6	169725090	169725854
ENSG00000115594	IL1R1	6.7122	7.70224	10.1498	7.20722	10.1498	2.94258	1.36e-05	0.000631621	2	102064543	102179874
ENSG00000179776	CDH5	2.97418	2.92612	5.89135	2.95015	5.89135	2.9412	0.00722815	0.110239	16	66366621	66404786
ENSG00000151623	NR3C2	4.21995	5.74967	7.92589	4.98481	7.92589	2.94108	0.00484563	0.0817144	4	148078761	148444698
ENSG00000091129	NRCAM	5.61491	6.62482	9.05805	6.11986	9.05805	2.93818	0.000152495	0.0053707	7	108147622	108456717
ENSG00000166924	NYAP1	3.67319	3.35627	6.45225	3.51473	6.45225	2.93752	0.00380798	0.068996	7	100483926	100494799
ENSG00000011347	SYT7	3.29536	2.92612	6.048	3.11074	6.048	2.93726	0.00679565	0.105012	11	61515312	61581148
ENSG00000139874	SSTR1	3.77994	6.32567	7.988	5.0528	7.988	2.9352	0.0389387	0.332495	14	38207998	38213067
ENSG00000175920	DOK7	6.52536	5.3897	8.89076	5.95753	8.89076	2.93323	0.000457766	0.0135581	4	3463310	3501473
ENSG00000249279	CTC-436P18.3	6.31067	5.78464	8.97125	6.04766	8.97125	2.92359	1.95e-05	0.000879881	5	61201308	61264929
ENSG00000173320	STOX2	5.21917	6.34922	8.69475	5.78419	8.69475	2.91056	0.00056674	0.0161266	4	183853430	184023526
ENSG00000253500	AF121898.3	1.9779	1.86404	4.81932	1.92097	4.81932	2.89836	0.0235537	0.244878	8	87540834	87755718
ENSG00000073146	MOV10L1	4.43124	3.15717	6.68825	3.7942	6.68825	2.89404	0.0112279	0.152131	22	50089878	50161690
ENSG00000135363	LMO2	3.87933	2.31045	5.98294	3.09489	5.98294	2.88804	0.029294	0.282456	11	33858575	33892289
ENSG00000198515	CNGA1	7.05813	6.43976	9.63418	6.74895	9.63418	2.88524	5.16e-06	0.000273415	4	47935976	48016672
ENSG00000163581	SLC2A2	2.56038	2.31045	5.31849	2.43542	5.31849	2.88307	0.0160191	0.192043	3	170996347	171026750
ENSG00000148346	LCN2	5.82895	4.55103	8.06338	5.18999	8.06338	2.87339	0.00291957	0.0565924	9	128149070	128153455
ENSG00000184185	KCNJ12	5.77834	6.56574	9.04217	6.17204	9.04217	2.87013	6.88e-05	0.00262944	17	21376196	21419872
ENSG00000232453	RP4-794H19.1	6.32837	5.67708	8.86692	6.00272	8.86692	2.86419	6.76e-05	0.00262304	1	58882867	58903747
ENSG00000095637	SORBS1	6.16069	4.63007	8.25928	5.39538	8.25928	2.8639	0.00503541	0.083712	10	95311770	95561414
ENSG00000178814	OPLAH	5.49466	4.63007	7.92589	5.06237	7.92589	2.86352	0.00107851	0.0267931	8	144051265	144063832
ENSG00000176438	SYNE3	5.32873	3.68719	7.36957	4.50796	7.36957	2.86161	0.0136439	0.17391	14	95407265	95475836
ENSG00000236682	AC068282.3	3.87933	3.5312	6.56027	3.70526	6.56027	2.85501	0.00415086	0.0736861	2	127389129	127400580
ENSG00000168398	BDKRB2	3.14369	5.24654	7.0477	4.19512	7.0477	2.85259	0.0348393	0.310965	14	96204678	96244166
ENSG00000123977	DAW1	6.64317	7.79091	10.0646	7.21704	10.0646	2.84754	9.09e-05	0.00336334	2	227871053	227924344
ENSG00000138435	CHRNA1	3.67319	4.07395	6.71521	3.87357	6.71521	2.84164	0.00332382	0.062617	2	174747591	174764472
ENSG00000125730	C3	8.8316	6.70002	10.6056	7.76581	10.6056	2.83981	0.00625744	0.0987422	19	6677703	6730562
ENSG00000121797	CCRL2	4.29387	4.63007	7.30004	4.46197	7.30004	2.83807	0.00114575	0.0280268	3	46407162	46412997
ENSG00000120738	EGR1	7.5252	7.28035	10.2338	7.40278	10.2338	2.831	2.94e-08	2.82e-06	5	138465489	138469315
ENSG00000232896	RP11-410K21.2	1.9779	2.92612	5.28289	2.45201	5.28289	2.83088	0.0248616	0.253516	9	110599474	110605219
ENSG00000127528	KLF2	7.38002	6.85613	9.94298	7.11807	9.94298	2.8249	1.26e-06	7.82e-05	19	16324816	16327874
ENSG00000248690	HAS2-AS1	3.87933	5.78464	7.64664	4.83199	7.64664	2.81465	0.0195669	0.217266	8	121639292	121644693
ENSG00000149201	CCDC81	7.85932	7.2305	10.3534	7.54491	10.3534	2.80846	1.03e-06	6.6e-05	11	86374735	86423109
ENSG00000274031	RP11-413H22.3	1.56533	2.65088	4.91545	2.10811	4.91545	2.80734	0.0369849	0.322726	16	56465641	56466162
ENSG00000170745	KCNS3	6.12062	5.24654	8.47969	5.68358	8.47969	2.79611	0.000560738	0.0160537	2	17877846	18361616
ENSG00000041353	RAB27B	6.86552	5.24654	8.85181	6.05603	8.85181	2.79578	0.00479386	0.0812099	18	54717859	54895516
ENSG00000214518	KRTAP2-2	3.77994	5.74967	7.56007	4.7648	7.56007	2.79526	0.0242316	0.249266	17	41054497	41055230
ENSG00000119508	NR4A3	3.4326	3.15717	6.08981	3.29488	6.08981	2.79492	0.00855277	0.125006	9	99821854	99866891
ENSG00000107611	CUBN	5.18071	7.5171	9.13992	6.34891	9.13992	2.79102	0.0224717	0.237714	10	16823963	17129831
ENSG00000197444	OGDHL	4.67204	3.35627	6.79319	4.01415	6.79319	2.77903	0.0145075	0.181594	10	49734642	49762379
ENSG00000120937	NPPB	14.7621	14.9981	17.659	14.8801	17.659	2.77891	4.01e-20	1.76e-17	1	11857463	11858931
ENSG00000237476	XXbac-B135H6.15	3.77994	4.37864	6.84293	4.07929	6.84293	2.76364	0.00421497	0.0744475	22	20957091	20964679
ENSG00000118849	RARRES1	4.77887	6.00823	8.15484	5.39355	8.15484	2.76129	0.00294077	0.0569062	3	158696891	158732696
ENSG00000164796	CSMD3	1.56533	2.92612	5.00557	2.24573	5.00557	2.75984	0.047167	0.371585	8	112222927	113437099
ENSG00000137673	MMP7	11.988	11.4565	14.4785	11.7222	14.4785	2.75632	3.55e-10	4.87e-08	11	102520507	102530753
ENSG00000136542	GALNT5	5.75235	6.66291	8.9572	6.20763	8.9572	2.74957	0.000284478	0.00920564	2	157257597	157314211
ENSG00000277559	RP11-434E6.4	3.87933	2.31045	5.84327	3.09489	5.84327	2.74838	0.0411232	0.344152	16	54290964	54292422
ENSG00000176641	RNF152	5.55604	7.83328	9.43776	6.69466	9.43776	2.7431	0.0194761	0.216884	18	61808062	61894247
ENSG00000073150	PANX2	5.58577	6.3952	8.73153	5.99049	8.73153	2.74104	0.000290654	0.00937092	22	50170730	50180294
ENSG00000151640	DPYSL4	6.90143	7.91446	10.1473	7.40795	10.1473	2.73938	5.89e-05	0.00233852	10	132186899	132205776
ENSG00000213694	S1PR3	7.93057	8.2129	10.8055	8.07174	10.8055	2.73372	5.24e-09	6.09e-07	9	88991446	89005010
ENSG00000178033	FAM26E	6.29275	7.85812	9.80861	7.07544	9.80861	2.73317	0.00188168	0.0410803	6	116511645	116524792
ENSG00000148053	NTRK2	5.39741	3.35627	7.10998	4.37684	7.10998	2.73314	0.0415881	0.346186	9	84668550	85027070
ENSG00000197415	VEPH1	10.4862	9.82433	12.8812	10.1553	12.8812	2.72598	2.79e-08	2.72e-06	3	157259741	157533619
ENSG00000126785	RHOJ	7.05813	9.79676	11.1492	8.42745	11.1492	2.72172	0.0312371	0.292665	14	63204113	63293219
ENSG00000064692	SNCAIP	1.56533	1.86404	4.42122	1.71469	4.42122	2.70653	0.0420929	0.348239	5	122311353	122464219
ENSG00000105357	MYH14	2.78207	2.31045	5.24639	2.54626	5.24639	2.70013	0.0262447	0.262432	19	50188185	50310545
ENSG00000268621	AC006262.5	5.58577	4.18282	7.5822	4.8843	7.5822	2.6979	0.0108647	0.14921	19	46189165	46203083
ENSG00000128805	ARHGAP22	11.3983	10.6542	13.7148	11.0263	13.7148	2.68856	1.07e-07	9.24e-06	10	48446033	48656265
ENSG00000144339	TMEFF2	3.4326	3.15717	5.98294	3.29488	5.98294	2.68805	0.0123317	0.161649	2	191949042	192195709
ENSG00000005187	ACSM3	6.61461	7.12529	9.55058	6.86995	9.55058	2.68063	1e-05	0.000485156	16	20610242	20797581
ENSG00000004139	SARM1	6.69865	7.45333	9.74626	7.07599	9.74626	2.67027	3.23e-05	0.00138311	17	28364355	28404049
ENSG00000121753	ADGRB2	7.69169	8.80479	10.9069	8.24824	10.9069	2.65863	7.11e-05	0.00269462	1	31727116	31764893
ENSG00000143867	OSR1	3.14369	5.0876	6.76766	4.11564	6.76766	2.65202	0.0465724	0.368441	2	19351484	19358653
ENSG00000138798	EGF	7.23743	6.50412	9.52224	6.87078	9.52224	2.65146	6.87e-05	0.00262944	4	109912883	110012266
ENSG00000164484	TMEM200A	8.75842	10.4691	12.264	9.61378	12.264	2.65024	0.00125068	0.0301313	6	130365733	130443063
ENSG00000140403	DNAJA4	3.67319	5.3897	7.17938	4.53144	7.17938	2.64794	0.0269718	0.267719	15	78264085	78282196
ENSG00000136404	TM6SF1	4.36419	4.46741	7.05827	4.4158	7.05827	2.64247	0.00296055	0.0570606	15	83107406	83144854
ENSG00000225399	RP11-3B7.1	1.56533	1.86404	4.35419	1.71469	4.35419	2.63951	0.0483212	0.376315	3	49260084	49261316
ENSG00000115009	CCL20	7.33696	8.99223	10.8	8.16459	10.8	2.63536	0.00196313	0.042403	2	227813841	227817564
ENSG00000198959	TGM2	12.997	12.2192	15.241	12.6081	15.241	2.63297	1.08e-07	9.28e-06	20	38127386	38166578
ENSG00000084710	EFR3B	5.46297	6.66291	8.69475	6.06294	8.69475	2.63181	0.00227552	0.047359	2	25042129	25159137
ENSG00000134138	MEIS2	8.7486	9.29476	11.653	9.02168	11.653	2.63133	4.32e-08	4.07e-06	15	36889203	37101299
ENSG00000104903	LYL1	2.97418	3.35627	5.79355	3.16522	5.79355	2.62832	0.0169756	0.199153	19	13099032	13103161
ENSG00000185640	KRT79	2.97418	3.82795	6.02664	3.40106	6.02664	2.62557	0.0191402	0.214408	12	52821409	52834295
ENSG00000248079	DPH6-AS1	4.29387	4.37864	6.96026	4.33626	6.96026	2.624	0.00366901	0.067102	15	35546194	35859001
ENSG00000185818	NAT8L	6.60011	7.30465	9.55058	6.95238	9.55058	2.5982	5.88e-05	0.00233848	4	2059511	2069089
ENSG00000172345	STARD5	6.14079	7.39794	9.36727	6.76937	9.36727	2.5979	0.00146632	0.0341538	15	81309052	81324183
ENSG00000177374	HIC1	5.72589	6.98199	8.94871	6.35394	8.94871	2.59477	0.0023914	0.0489985	17	2054153	2063241
ENSG00000206077	ZDHHC11B	3.14369	2.31045	5.31849	2.72707	5.31849	2.59141	0.0376251	0.325757	5	710359	766952
ENSG00000176225	RTTN	7.02596	7.25564	9.7232	7.1408	9.7232	2.5824	2.19e-06	0.000127184	18	70003792	70205945
ENSG00000145147	SLIT2	5.67147	7.30465	9.06593	6.48806	9.06593	2.57787	0.00774238	0.116063	4	20253259	20620561
ENSG00000154263	ABCA10	5.01575	5.3897	7.7803	5.20273	7.7803	2.57757	0.0011813	0.0286964	17	69147213	69244846
ENSG00000164932	CTHRC1	8.18001	8.16726	10.7364	8.17363	10.7364	2.56277	1.19e-08	1.27e-06	8	103371514	103382997
ENSG00000256040	PAPPA-AS1	5.36348	6.56574	8.5261	5.96461	8.5261	2.5615	0.00359823	0.0661863	9	116398156	116400606
ENSG00000137752	CASP1	4.05967	4.37864	6.78048	4.21916	6.78048	2.56132	0.00628133	0.0988944	11	105025442	105035250
ENSG00000138944	KIAA1644	4.87834	3.15717	6.57507	4.01775	6.57507	2.55731	0.04853	0.376613	22	44243666	44312851
ENSG00000230024	RP11-95P13.1	2.56038	3.35627	5.5154	2.95833	5.5154	2.55707	0.031228	0.292665	1	219435151	219442642
ENSG00000277999	RP11-426C22.8	1.9779	2.65088	4.86819	2.31439	4.86819	2.5538	0.045321	0.362795	16	29272219	29272772
ENSG00000011465	DCN	7.24677	8.20001	10.2763	7.72339	10.2763	2.55287	9.76e-05	0.00360253	12	91140483	91183123
ENSG00000168824	NSG1	7.73877	8.61382	10.7223	8.1763	10.7223	2.54605	2.76e-05	0.00121524	4	4348139	4419058
ENSG00000248890	HHIP-AS1	8.94206	10.4891	12.2569	9.7156	12.2569	2.54127	0.000933592	0.0241508	4	144642921	144661357
ENSG00000172403	SYNPO2	6.44652	7.19194	9.35447	6.81923	9.35447	2.53524	0.000168333	0.00581181	4	118850687	119061247
ENSG00000174804	FZD4	7.23743	7.2305	9.7625	7.23396	9.7625	2.52854	1.76e-06	0.000105502	11	86945678	86955391
ENSG00000162998	FRZB	2.97418	2.31045	5.17049	2.64232	5.17049	2.52818	0.0416238	0.346301	2	182833274	182867162
ENSG00000236377	AC084809.3	3.5579	2.92612	5.76802	3.24201	5.76802	2.52601	0.0264267	0.2635	17	32905661	32906584
ENSG00000107957	SH3PXD2A	10.079	10.6013	12.8587	10.3401	12.8587	2.5186	1.56e-08	1.6e-06	10	103594026	103855543
ENSG00000272031	ANKRD34A	5.43056	5.9478	8.19848	5.68918	8.19848	2.5093	0.000892127	0.0232497	1	145959441	145964582
ENSG00000183876	ARSI	7.50199	8.04999	10.2808	7.77599	10.2808	2.50478	4.97e-06	0.000264721	5	150296342	150339307
ENSG00000235531	MSC-AS1	7.8654	9.35708	11.1129	8.61124	11.1129	2.50164	0.0014211	0.0332328	8	71828166	72118393
ENSG00000028277	POU2F2	11.7399	11.8497	14.2935	11.7948	14.2935	2.49873	1.15e-12	2.26e-10	19	42086109	42196585
ENSG00000058404	CAMK2B	4.6155	3.35627	6.48395	3.98589	6.48395	2.49806	0.0314846	0.293889	7	44217149	44334577
ENSG00000255400	RP13-631K18.5	5.14121	3.5312	6.83065	4.3362	6.83065	2.49445	0.0416414	0.346301	11	12086890	12089441
ENSG00000203886	CYP17A1-AS1	3.29536	2.92612	5.60461	3.11074	5.60461	2.49387	0.0276162	0.271156	10	102832720	102834516
ENSG00000129946	SHC2	7.31936	7.59797	9.95009	7.45867	9.95009	2.49142	2.21e-06	0.000128069	19	416582	460996
ENSG00000162878	PKDCC	6.34585	5.60064	8.46388	5.97325	8.46388	2.49063	0.00132238	0.0313221	2	42048019	42058528
ENSG00000178718	RPP25	7.38002	6.46154	9.39463	6.92078	9.39463	2.47385	0.00063064	0.0177256	15	74954415	74957464
ENSG00000109743	BST1	9.97048	9.28258	12.0982	9.62653	12.0982	2.47169	1.42e-06	8.66e-05	4	15702949	15738313
ENSG00000273107	RP11-165A20.3	3.5579	4.46741	6.48395	4.01266	6.48395	2.47129	0.019616	0.217475	10	24953240	24953513
ENSG00000104368	PLAT	11.8435	13.4414	15.1114	12.6425	15.1114	2.46892	0.000997798	0.0254366	8	42175232	42207724
ENSG00000184254	ALDH1A3	11.2035	11.0133	13.5692	11.1084	13.5692	2.46084	4.02e-11	6.36e-09	15	100877713	100916626
ENSG00000144115	THNSL2	5.64346	6.17566	8.35667	5.90956	8.35667	2.44711	0.000883253	0.0231215	2	88170294	88186636
ENSG00000139508	SLC46A3	8.26975	8.32405	10.7413	8.2969	10.7413	2.44442	4.52e-08	4.24e-06	13	28700063	28718970
ENSG00000256235	SMIM3	11.1215	10.1668	13.0846	10.6441	13.0846	2.44041	2.2e-05	0.000982167	5	150777945	150796734
ENSG00000162496	DHRS3	9.0339	11.5996	12.7566	10.3167	12.7566	2.43985	0.0370854	0.323141	1	12567909	12617731
ENSG00000118514	ALDH8A1	2.97418	4.37864	6.11026	3.67641	6.11026	2.43385	0.0487622	0.377756	6	134917389	134950122
ENSG00000069702	TGFBR3	6.16069	6.20177	8.6075	6.18123	8.6075	2.42627	0.000227915	0.00754226	1	91680342	91906335
ENSG00000164736	SOX17	6.84107	7.12529	9.40708	6.98318	9.40708	2.4239	2.87e-05	0.00126024	8	54457934	54460888
ENSG00000277050	RP11-102G14.1	4.43124	3.82795	6.53023	4.12959	6.53023	2.40063	0.0173549	0.202274	14	51637347	51637947
ENSG00000105825	TFPI2	11.4035	9.21368	12.7048	10.3086	12.7048	2.39618	0.0189487	0.213564	7	93885396	93890991
ENSG00000184012	TMPRSS2	3.14369	3.15717	5.54575	3.15043	5.54575	2.39532	0.031922	0.295295	21	41464550	41531116
ENSG00000259518	LINC01583	3.14369	3.15717	5.54575	3.15043	5.54575	2.39532	0.031922	0.295295	15	82088593	82097694
ENSG00000228262	LINC01320	5.72589	6.20177	8.35667	5.96383	8.35667	2.39284	0.000965823	0.0248017	2	34677554	34738231
ENSG00000198483	ANKRD35	4.05967	3.82795	6.33547	3.94381	6.33547	2.39166	0.0164991	0.19579	1	145866559	145885866
ENSG00000107317	PTGDS	4.92561	4.90895	7.30892	4.91728	7.30892	2.39164	0.00428132	0.0753364	9	136977504	136985435
ENSG00000168243	GNG4	5.21917	6.00823	8.00449	5.6137	8.00449	2.39079	0.00384631	0.0694753	1	235547686	235650754
ENSG00000100121	GGTLC2	5.39741	5.88473	8.02618	5.64107	8.02618	2.38511	0.00190455	0.0414956	22	22644474	22647903
ENSG00000225166	AC012462.2	3.29536	3.5312	5.79355	3.41328	5.79355	2.38027	0.027271	0.270229	2	215453706	215463871
ENSG00000254486	RP13-631K18.2	3.29536	3.82795	5.93787	3.56166	5.93787	2.37621	0.0274013	0.270604	11	12030874	12061785
ENSG00000103888	CEMIP	6.94797	8.67567	10.1864	7.81182	10.1864	2.37457	0.0096726	0.137478	15	80779342	80951776
ENSG00000206129	CTD-2008L17.2	2.97418	2.92612	5.31849	2.95015	5.31849	2.36834	0.0400868	0.339161	18	56003612	56191262
ENSG00000166173	LARP6	13.9052	13.1667	15.8994	13.536	15.8994	2.36346	4.4e-07	3.12e-05	15	70829129	70854159
ENSG00000269881	AC004754.3	3.5579	4.07395	6.16994	3.81593	6.16994	2.35402	0.0233945	0.243945	16	249546	269943
ENSG00000225614	ZNF469	9.32144	9.23596	11.6231	9.2787	11.6231	2.34437	6e-09	6.92e-07	16	88427470	88440757
ENSG00000255038	RP11-1167A19.2	4.55666	4.55103	6.89101	4.55385	6.89101	2.33717	0.00927495	0.133548	11	66067276	66069619
ENSG00000259146	RP1-261D10.2	7.82856	7.4749	9.98789	7.65173	9.98789	2.33616	1.29e-05	0.000606944	14	71292728	71321814
ENSG00000152127	MGAT5	10.0025	9.73105	12.184	9.86679	12.184	2.31716	1.39e-08	1.44e-06	2	134119982	134454621
ENSG00000116667	C1orf21	9.58336	8.37657	11.2926	8.97996	11.2926	2.31259	0.000877156	0.0229962	1	184387057	184629020
ENSG00000179219	LINC00311	5.72589	4.37864	7.36106	5.05227	7.36106	2.30879	0.0309339	0.291223	16	85282957	85285963
ENSG00000140600	SH3GL3	4.72644	5.67708	7.50705	5.20176	7.50705	2.30529	0.0126474	0.164434	15	83447227	83618743
ENSG00000258115	RP11-89M22.3	4.36419	5.97833	7.46796	5.17126	7.46796	2.2967	0.042627	0.349827	12	72046148	72057377
ENSG00000267316	RP11-879F14.3	7.73877	7.59797	9.9642	7.66837	9.9642	2.29583	6.47e-06	0.000333564	18	61571341	61579456
ENSG00000135454	B4GALNT1	6.52536	5.47781	8.29546	6.00159	8.29546	2.29387	0.00827504	0.122066	12	57623409	57633355
ENSG00000100867	DHRS2	5.49466	6.06623	8.06861	5.78044	8.06861	2.28817	0.00306499	0.0587406	14	23630114	23645639
ENSG00000182379	NXPH4	4.36419	4.90895	6.91447	4.63657	6.91447	2.2779	0.0139763	0.177502	12	57216794	57226449
ENSG00000267069	RP11-64C12.8	4.36419	3.82795	6.36981	4.09607	6.36981	2.27374	0.025465	0.257721	18	12288307	12291488
ENSG00000166033	HTRA1	9.51546	9.42515	11.7368	9.4703	11.7368	2.2665	1.24e-08	1.31e-06	10	122461524	122514908
ENSG00000105371	ICAM4	3.29536	4.18282	6.00495	3.73909	6.00495	2.26586	0.0424899	0.349545	19	10286966	10288522
ENSG00000071575	TRIB2	6.03699	7.93017	9.24541	6.98358	9.24541	2.26183	0.0327802	0.299599	2	12716888	12742734
ENSG00000134668	SPOCD1	13.4022	10.9201	14.4228	12.1611	14.4228	2.26162	0.0489311	0.378517	1	31790421	31816051
ENSG00000227028	SLC8A1-AS1	6.25624	6.7715	8.76416	6.51387	8.76416	2.2503	0.000915735	0.0237942	2	39786452	40255209
ENSG00000100918	REC8	6.7122	6.85613	9.03416	6.78416	9.03416	2.25	0.000188587	0.00641013	14	24171852	24180257
ENSG00000163975	MFI2	11.2053	10.1076	12.9012	10.6564	12.9012	2.24473	0.000321169	0.0101015	3	196988620	197029816
ENSG00000106034	CPED1	6.87759	7.46415	9.40294	7.17087	9.40294	2.23207	0.000360123	0.0110038	7	120988676	121297444
ENSG00000185760	KCNQ5	6.19967	5.47781	8.06861	5.83874	8.06861	2.22987	0.00591588	0.0946702	6	72621791	73198851
ENSG00000128656	CHN1	8.89829	8.24465	10.7984	8.57147	10.7984	2.22691	4.94e-05	0.00202842	2	174799362	175005369
ENSG00000113657	DPYSL3	12.8698	11.7415	14.5252	12.3057	14.5252	2.21951	0.000331951	0.0103781	5	147390810	147510056
ENSG00000088543	C3orf18	7.11022	6.96685	9.25692	7.03853	9.25692	2.21839	0.00012658	0.00456807	3	50558024	50571027
ENSG00000170323	FABP4	5.58577	4.63007	7.31774	5.10792	7.31774	2.20982	0.0215038	0.230623	8	81478418	81483263
ENSG00000158050	DUSP2	4.43124	3.82795	6.33547	4.12959	6.33547	2.20588	0.0321984	0.296913	2	96143165	96145440
ENSG00000185972	CCIN	4.49531	4.77624	6.83065	4.63577	6.83065	2.19488	0.0156079	0.189052	9	36169393	36171334
ENSG00000175745	NR2F1	7.5252	7.80801	9.8548	7.6666	9.8548	2.1882	3.29e-05	0.00140934	5	93583336	93594615
ENSG00000006606	CCL26	9.85007	9.85756	12.0378	9.85381	12.0378	2.18396	1.14e-08	1.23e-06	7	75769532	75789896
ENSG00000173706	HEG1	11.7633	11.3799	13.7531	11.5716	13.7531	2.18155	9.54e-08	8.28e-06	3	124965709	125055958
ENSG00000250786	SNHG18	11.101	11.4346	13.4415	11.2678	13.4415	2.17366	3.42e-08	3.26e-06	5	9546199	9550609
ENSG00000237187	NR2F1-AS1	8.80972	8.60895	10.8811	8.70933	10.8811	2.17173	1.2e-06	7.59e-05	5	93409358	93585648
ENSG00000144583	2019-03-04	10.0907	9.56749	11.9978	9.8291	11.9978	2.16874	3.83e-06	0.00021067	2	216257864	216372027
ENSG00000273079	GRIN2B	4.92561	5.43443	7.34389	5.18002	7.34389	2.16387	0.011337	0.152836	12	13537336	13981957
ENSG00000117122	MFAP2	11.0413	11.4893	13.4182	11.2653	13.4182	2.15294	3.01e-07	2.32e-05	1	16974501	16980835
ENSG00000083067	TRPM3	3.97232	4.18282	6.22726	4.07757	6.22726	2.14969	0.0306292	0.289555	9	70529062	71446904
ENSG00000213949	ITGA1	8.01496	8.76156	10.5365	8.38826	10.5365	2.1482	0.000202016	0.00681377	5	52787895	52959210
ENSG00000141068	KSR1	8.63586	8.83012	10.8788	8.73299	10.8788	2.14584	1.22e-06	7.62e-05	17	27456713	27626438
ENSG00000261512	RP11-46D6.1	4.49531	3.95619	6.36981	4.22575	6.36981	2.14406	0.0340978	0.30682	16	46622860	46624451
ENSG00000182013	PNMAL1	7.64302	7.04103	9.4816	7.34203	9.4816	2.13957	0.000650044	0.0181466	19	46466490	46471563
ENSG00000135476	ESPL1	6.7122	5.29586	8.13501	6.00403	8.13501	2.13098	0.0337713	0.305474	12	53268298	53293643
ENSG00000154310	TNIK	10.2125	10.6893	12.5776	10.4509	12.5776	2.12678	1.15e-06	7.33e-05	3	171061338	171460408
ENSG00000269729	AC006262.4	6.90143	6.88864	9.01801	6.89504	9.01801	2.12297	0.000370062	0.0112879	19	46163892	46180647
ENSG00000163297	ANTXR2	9.92903	10.4406	12.3012	10.1848	12.3012	2.11636	2.7e-06	0.000153681	4	79901148	80125454
ENSG00000148965	SAA4	3.67319	4.55103	6.22726	4.11211	6.22726	2.11515	0.0496923	0.381925	11	18231348	18236893
ENSG00000171408	PDE7B	5.58577	4.97099	7.38644	5.27838	7.38644	2.10806	0.0157503	0.189599	6	135851695	136195574
ENSG00000167100	SAMD14	7.31936	7.68384	9.60745	7.5016	9.60745	2.10585	0.000167607	0.00580527	17	50110039	50129882
ENSG00000146574	CCZ1B	8.14048	8.94664	10.6447	8.54356	10.6447	2.10116	0.00035837	0.0109694	7	6794133	6826770
ENSG00000182329	KIAA2012	4.14203	5.14255	6.74167	4.64229	6.74167	2.09938	0.0422705	0.348685	2	202073254	202197862
ENSG00000186354	C9orf47	4.14203	4.46741	6.40335	4.30472	6.40335	2.09863	0.0306576	0.289555	9	88990862	88996140
ENSG00000272221	XXbac-BPG181B23.7	4.43124	5.29586	6.96026	4.86355	6.96026	2.09671	0.0308877	0.291101	6	31394288	31395495
ENSG00000140323	DISP2	6.72562	5.67708	8.29546	6.20135	8.29546	2.09411	0.0156705	0.189262	15	40358234	40378639
ENSG00000103512	NOMO1	9.46635	9.69474	11.666	9.58054	11.666	2.08547	3.68e-07	2.74e-05	16	14833680	14896160
ENSG00000003989	SLC7A2	8.41348	7.19194	9.88034	7.80271	9.88034	2.07763	0.00734032	0.111755	8	17497087	17570573
ENSG00000166923	GREM1	11.3346	12.4013	13.9392	11.8679	13.9392	2.07124	0.000523009	0.015137	15	32717973	32745107
ENSG00000099822	HCN2	5.36348	6.6054	8.05285	5.98444	8.05285	2.06841	0.0278238	0.272779	19	589892	617159
ENSG00000077092	RARB	7.66408	7.19194	9.49527	7.42801	9.49527	2.06726	0.000518959	0.0150619	3	25174331	25597932
ENSG00000211448	DIO2	6.21877	5.71383	8.03156	5.9663	8.03156	2.06525	0.0069954	0.107436	14	80197526	80387757
ENSG00000131398	KCNC3	4.36419	4.90895	6.70179	4.63657	6.70179	2.06522	0.0294019	0.282874	19	50311936	50333515
ENSG00000263823	RP11-326K13.4	6.38019	5.85214	8.1744	6.11616	8.1744	2.05823	0.00618107	0.0979312	18	31942574	31944156
ENSG00000198108	CHSY3	5.97092	6.75396	8.41949	6.36244	8.41949	2.05705	0.00745257	0.112779	5	129904471	130186634
ENSG00000148082	SHC3	10.4289	10.2012	12.3685	10.315	12.3685	2.05351	1.91e-07	1.58e-05	9	89005770	89178767
ENSG00000221890	NPTXR	8.02041	8.92721	10.5241	8.47381	10.5241	2.05031	0.00102224	0.0257973	22	38818451	38843982
ENSG00000243244	STON1	6.84107	6.12198	8.52991	6.48153	8.52991	2.04838	0.00636131	0.100064	2	48529382	48598513
ENSG00000142156	COL6A1	12.298	12.3007	14.3426	12.2994	14.3426	2.04328	3.14e-09	3.75e-07	21	45981736	46005050
ENSG00000130707	ASS1	7.38848	8.08548	9.77697	7.73698	9.77697	2.03999	0.000890007	0.0232497	9	130444928	130501274
ENSG00000247679	RP11-1277A3.1	5.43056	5.24654	7.37803	5.33855	7.37803	2.03948	0.0123412	0.161653	5	177611252	177619754
ENSG00000244459	RP11-1398P2.1	8.65703	8.79195	10.7601	8.72449	10.7601	2.03557	3.97e-06	0.000217783	4	1574061	1580253
ENSG00000090661	CERS4	7.55557	7.8663	9.74135	7.71094	9.74135	2.03041	0.000153769	0.00540472	19	8206735	8262421
ENSG00000185614	FAM212A	7.61446	7.16565	9.40915	7.39005	9.40915	2.0191	0.000733862	0.0198937	3	49803253	49805030
ENSG00000172819	RARG	8.35856	6.66291	9.51842	7.51074	9.51842	2.00768	0.0404943	0.340965	12	53210566	53232980
ENSG00000171105	INSR	7.43823	7.5581	9.49916	7.49816	9.49916	2.00099	0.000213642	0.0071504	19	7112254	7294034
ENSG00000105290	APLP1	7.26526	8.4762	9.86387	7.87073	9.86387	1.99314	0.00886638	0.128519	19	35867898	35879791
ENSG00000154917	RAB6B	8.62874	10.0241	11.3103	9.32643	11.3103	1.98392	0.00849108	0.124456	3	133824238	133895836
ENSG00000105520	PLPPR2	10.3247	9.88199	12.0867	10.1034	12.0867	1.9833	8.61e-06	0.000428845	19	11355385	11365698
ENSG00000084636	COL16A1	8.41762	8.98096	10.6794	8.69929	10.6794	1.98006	0.000140624	0.00499273	1	31652246	31704319
ENSG00000174672	BRSK2	5.29313	6.46154	7.85493	5.87733	7.85493	1.9776	0.035133	0.312339	11	1389898	1462689
ENSG00000072163	LIMS2	11.6048	9.72431	12.6363	10.6646	12.6363	1.97178	0.0331084	0.3015	2	127638380	127681786
ENSG00000135318	NT5E	12.8709	12.0717	14.4362	12.4713	14.4362	1.96494	0.000146	0.0051627	6	85449583	85495791
ENSG00000142583	SLC2A5	6.05835	6.22742	8.10474	6.14289	8.10474	1.96186	0.00545993	0.0887567	1	9035106	9088478
ENSG00000175040	CHST2	8.19937	8.99596	10.5562	8.59767	10.5562	1.95849	0.000891517	0.0232497	3	143119330	143124014
ENSG00000260196	RP1-239B22.5	6.55573	6.03752	8.25469	6.29662	8.25469	1.95807	0.00783055	0.116789	11	17380648	17383531
ENSG00000108821	COL1A1	14.4109	16.5332	17.4287	15.4721	17.4287	1.95661	0.036739	0.321059	17	50183288	50201632
ENSG00000171368	TPPP	5.69894	4.97099	7.29111	5.33496	7.29111	1.95615	0.0303531	0.2887	5	659861	693395
ENSG00000226510	UPK1A-AS1	4.43124	4.46741	6.40335	4.44933	6.40335	1.95403	0.0400046	0.338794	19	35667947	35673291
ENSG00000123342	MMP19	6.60011	5.43443	7.96573	6.01727	7.96573	1.94845	0.0379307	0.327395	12	55835432	55842966
ENSG00000213901	SLC23A3	6.55573	7.20491	8.82731	6.88032	8.82731	1.94699	0.00477258	0.0811107	2	219161464	219170095
ENSG00000010278	CD9	14.1502	12.8598	15.4485	13.505	15.4485	1.94351	0.00310564	0.0592064	12	6199714	6238271
ENSG00000158457	TSPAN33	7.51751	7.06967	9.23147	7.29359	9.23147	1.93788	0.00157337	0.036128	7	129144891	129169697
ENSG00000079308	TNS1	11.1272	10.9347	12.9607	11.031	12.9607	1.92969	3.35e-07	2.54e-05	2	217799788	218002995
ENSG00000183779	ZNF703	10.913	11.119	12.9447	11.016	12.9447	1.92873	2.86e-07	2.22e-05	8	37695750	37700021
ENSG00000109846	CRYAB	13.3136	11.7359	14.4465	12.5248	14.4465	1.92168	0.0144234	0.180953	11	111908564	111923722
ENSG00000197381	ADARB1	8.78109	9.33954	10.9796	9.06032	10.9796	1.91924	0.000138901	0.00495159	21	45073852	45226560
ENSG00000101134	DOK5	6.88956	8.23203	9.47963	7.5608	9.47963	1.91884	0.02194	0.233684	20	54475596	54651171
ENSG00000167874	TMEM88	6.58547	6.7715	8.59667	6.67848	8.59667	1.91819	0.00285496	0.0557442	17	7855064	7856099
ENSG00000198624	CCDC69	7.54804	7.59797	9.48943	7.573	9.48943	1.91643	0.000348154	0.0107128	5	151181051	151224145
ENSG00000113361	CDH6	10.5925	11.8205	13.1079	11.2065	13.1079	1.90143	0.00403005	0.072052	5	31193749	31329146
ENSG00000231776	LINC01611	6.0153	6.90462	8.36094	6.45996	8.36094	1.90098	0.0173547	0.202274	6	84421027	84556152
ENSG00000205336	ADGRG1	10.7946	8.95434	11.7725	9.87448	11.7725	1.89805	0.0415718	0.346186	16	57610651	57665580
ENSG00000140332	TLE3	8.7875	9.56497	11.0717	9.17624	11.0717	1.89551	0.00071275	0.0194114	15	70047789	70098176
ENSG00000165084	C8orf34	6.91321	7.52746	9.11483	7.22033	9.11483	1.8945	0.00360852	0.0662721	8	68330721	68819022
ENSG00000166974	MAPRE2	10.222	10.1179	12.0632	10.1699	12.0632	1.89329	8.3e-07	5.47e-05	18	34976927	35143470
ENSG00000180155	LYNX1	6.19967	6.00823	7.988	6.10395	7.988	1.88406	0.00911518	0.131626	8	142764333	142778224
ENSG00000071246	VASH1	6.7909	7.57817	9.06854	7.18453	9.06854	1.88401	0.00697619	0.107235	14	76762188	76783015
ENSG00000237512	UNC5B-AS1	5.99328	6.34922	8.04224	6.17125	8.04224	1.87099	0.0100301	0.140509	10	71217223	71218228
ENSG00000187957	DNER	6.21877	5.88473	7.92011	6.05175	7.92011	1.86835	0.012239	0.160915	2	229357628	229714558
ENSG00000255317	RP11-688I9.2	8.24201	7.25564	9.60925	7.74883	9.60925	1.86042	0.00958482	0.136799	11	126992451	126995458
ENSG00000166405	RIC3	5.58577	5.60064	7.45202	5.59321	7.45202	1.85881	0.0181622	0.207658	11	8106092	8169055
ENSG00000113083	LOX	12.182	13.0288	14.4605	12.6054	14.4605	1.8551	0.000389325	0.0117731	5	122063194	122078285
ENSG00000179546	HTR1D	5.25662	6.22742	7.59677	5.74202	7.59677	1.85475	0.041281	0.345104	1	23191894	23194729
ENSG00000157978	LDLRAP1	9.60893	9.11752	11.215	9.36322	11.215	1.85176	0.00013182	0.004728	1	25543579	25568886
ENSG00000233223	AC113189.5	8.24201	7.82491	9.8848	8.03346	9.8848	1.85134	0.000660961	0.0182811	17	7581963	7584072
ENSG00000146477	SLC22A3	9.93915	8.91147	11.2757	9.42531	11.2757	1.85036	0.00389186	0.0700096	6	160348267	160452581
ENSG00000249679	RP11-279O9.4	7.31936	6.90462	8.95438	7.11199	8.95438	1.84238	0.00359558	0.0661863	4	185471515	185472263
ENSG00000144655	CSRNP1	9.51546	8.9389	11.0659	9.22718	11.0659	1.83869	0.000331807	0.0103781	3	39141854	39154562
ENSG00000115041	KCNIP3	7.24677	7.5881	9.25233	7.41744	9.25233	1.83489	0.00163538	0.037106	2	95297303	95386083
ENSG00000228594	C1orf233	7.98738	7.90655	9.78017	7.94696	9.78017	1.8332	0.000296096	0.00952884	1	1598011	1600096
ENSG00000141448	GATA6	10.3809	10.589	12.3156	10.4849	12.3156	1.83063	2.11e-06	0.000123183	18	22169442	22202528
ENSG00000092096	SLC22A17	7.17033	7.21776	9.02071	7.19404	9.02071	1.82667	0.00173655	0.0387761	14	23346305	23352912
ENSG00000177234	LINC01561	5.10059	5.78464	7.26398	5.44261	7.26398	1.82137	0.0387729	0.331402	10	120597948	120600124
ENSG00000239264	TXNDC5	6.03699	7.35205	8.5108	6.69452	8.5108	1.81628	0.0479198	0.374205	6	7881516	7910814
ENSG00000102996	MMP15	9.84239	10.2814	11.8747	10.0619	11.8747	1.81281	4.07e-05	0.00169782	16	58025565	58046901
ENSG00000162426	SLC45A1	5.80387	6.09437	7.76102	5.94912	7.76102	1.81191	0.0161995	0.193438	1	8317825	8344167
ENSG00000273888	FRMD6-AS1	9.98729	9.55994	11.5848	9.77361	11.5848	1.81114	6.9e-05	0.00263067	14	51649515	51651744
ENSG00000118515	SGK1	11.9775	11.0622	13.3309	11.5199	13.3309	1.81104	0.00137904	0.0324657	6	134169245	134318112
ENSG00000077942	FBLN1	7.34567	6.25261	8.6039	6.79914	8.6039	1.80476	0.0328177	0.299787	22	45502237	45601135
ENSG00000105649	RAB3A	8.50581	7.11159	9.61105	7.8087	9.61105	1.80235	0.0362175	0.318565	19	18196783	18204074
ENSG00000259687	LINC01220	7.41357	6.64399	8.83039	7.02878	8.83039	1.80161	0.0130152	0.167906	14	75294403	75296638
ENSG00000171476	HOPX	5.69894	6.43976	7.867	6.06935	7.867	1.79765	0.0274708	0.270803	4	56647987	56681899
ENSG00000188517	COL25A1	7.15057	7.2305	8.98793	7.19053	8.98793	1.7974	0.00217359	0.0458204	4	108810720	109302657
ENSG00000107742	SPOCK2	6.25624	7.19194	8.51847	6.72409	8.51847	1.79438	0.0237108	0.245927	10	72059034	72089032
ENSG00000185442	FAM174B	6.55573	7.82491	8.98239	7.19032	8.98239	1.79207	0.0364121	0.319316	15	92617442	92809884
ENSG00000225746	SNHG23	10.3649	11.2207	12.5802	10.7928	12.5802	1.78737	0.00104666	0.0261502	14	100937400	100960199
ENSG00000270006	RP11-178L8.7	8.3926	7.93795	9.95009	8.16528	9.95009	1.78481	0.00105428	0.026303	16	87317508	87318043
ENSG00000204314	PRRT1	7.38848	6.95154	8.95438	7.17001	8.95438	1.78437	0.00493485	0.0825094	6	32148358	32154373
ENSG00000158406	HIST1H4H	8.94779	9.62891	11.0698	9.28835	11.0698	1.78144	0.00080586	0.0213504	6	26277608	26285638
ENSG00000273173	SNURF	7.04749	7.0265	8.8149	7.03699	8.8149	1.77791	0.00329429	0.0621943	15	24954985	24977850
ENSG00000164211	STARD4	8.92471	10.1568	11.3142	9.54077	11.3142	1.77344	0.011285	0.152487	5	111496032	111512590
ENSG00000198682	PAPSS2	11.5389	11.5362	13.3103	11.5376	13.3103	1.77277	6.53e-07	4.37e-05	10	87659612	87747705
ENSG00000115008	IL1A	8.86533	7.89859	10.1498	8.38196	10.1498	1.76784	0.00865907	0.126139	2	112773914	112784590
ENSG00000178573	MAF	9.00668	8.36506	10.4448	8.68587	10.4448	1.75892	0.00165683	0.0374956	16	79585842	79600714
ENSG00000149557	FEZ1	11.1107	12.7642	13.6959	11.9374	13.6959	1.7585	0.0324823	0.298662	11	125445744	125496317
ENSG00000138172	CALHM2	5.39741	5.67708	7.29111	5.53725	7.29111	1.75387	0.0313904	0.29363	10	103446785	103452402
ENSG00000116396	KCNC4	9.41136	9.72206	11.317	9.56671	11.317	1.75025	5.16e-05	0.00209641	1	110211342	110283100
ENSG00000170500	LONRF2	5.25662	5.91661	7.33523	5.58662	7.33523	1.74861	0.0429802	0.351304	2	100273290	100322733
ENSG00000237172	B3GNT9	6.61461	7.6463	8.87889	7.13045	8.87889	1.74844	0.0261188	0.261959	16	67148104	67151214
ENSG00000151276	MAGI1	10.5953	10.5296	12.3106	10.5625	12.3106	1.74816	2.91e-06	0.000163336	3	65353524	66038834
ENSG00000173511	VEGFB	10.3455	9.96627	11.9032	10.1559	11.9032	1.74731	5.63e-05	0.00224827	11	64234537	64238793
ENSG00000267577	CTD-2587H24.5	9.37351	10.0259	11.4438	9.69973	11.4438	1.74405	0.000625757	0.0176166	19	55158938	55177540
ENSG00000244242	IFITM10	6.41374	6.3952	8.14496	6.40447	8.14496	1.74049	0.011144	0.151515	11	1732409	1750591
ENSG00000188211	NCR3LG1	6.73891	6.34922	8.282	6.54407	8.282	1.73793	0.0132647	0.170065	11	17351725	17377341
ENSG00000119673	ACOT2	7.15057	6.6054	8.6111	6.87798	8.6111	1.73311	0.0122817	0.161269	14	73567619	73575658
ENSG00000171992	SYNPO	11.2408	11.7258	13.2139	11.4833	13.2139	1.73064	5.99e-05	0.00237086	5	150601079	150659220
ENSG00000110031	LPXN	10.5704	9.8348	11.9311	10.2026	11.9311	1.72855	0.0011014	0.0271695	11	58526870	58578220
ENSG00000197555	SIPA1L1	11.0162	11.5792	13.0259	11.2977	13.0259	1.72816	0.000140407	0.00499273	14	71320448	71741229
ENSG00000103034	NDRG4	8.9218	7.96107	10.1694	8.44143	10.1694	1.728	0.00993125	0.139571	16	58462845	58513628
ENSG00000162849	KIF26B	7.47046	7.74726	9.33504	7.60886	9.33504	1.72618	0.00208993	0.0445385	1	245154984	245709431
ENSG00000182853	VMO1	5.32873	5.56085	7.16967	5.44479	7.16967	1.72488	0.0370681	0.323141	17	4785284	4786433
ENSG00000137198	GMPR	7.17033	7.42035	9.01259	7.29534	9.01259	1.71725	0.00371795	0.0676443	6	16238579	16295549
ENSG00000144136	SLC20A1	12.7598	12.2924	14.2416	12.5261	14.2416	1.71551	5.23e-05	0.00211396	2	112645856	112663827
ENSG00000135074	ADAM19	12.9499	11.4483	13.9139	12.1991	13.9139	1.71477	0.0266096	0.264723	5	157395533	157575775
ENSG00000171617	ENC1	13.2913	13.4642	15.0925	13.3777	15.0925	1.71476	3.64e-07	2.72e-05	5	74627405	74641424
ENSG00000135127	CCDC64	5.97092	6.83959	8.1149	6.40526	8.1149	1.70965	0.03627	0.318766	12	119989868	120094494
ENSG00000115902	SLC1A4	7.6571	8.67101	9.86387	8.16405	9.86387	1.69981	0.0146266	0.182199	2	64988476	65023865
ENSG00000162599	NFIA	7.30155	7.56817	9.12492	7.43486	9.12492	1.69006	0.00359438	0.0661863	1	60865258	61462793
ENSG00000158560	DYNC1I1	6.47857	7.28035	8.56738	6.87946	8.56738	1.68791	0.0240901	0.248101	7	95772505	96110322
ENSG00000107738	C10orf54	8.90125	8.14724	10.2067	8.52425	10.2067	1.68247	0.00531858	0.0873432	10	71747558	71773498
ENSG00000276851	RP5-875H18.9	10.7624	11.0161	12.5613	10.8893	12.5613	1.67199	1.6e-05	0.000736663	17	50094064	50094647
ENSG00000230082	PRRT3-AS1	7.67795	8.03554	9.52795	7.85675	9.52795	1.6712	0.00244604	0.0498851	3	9947403	9954787
ENSG00000137642	SORL1	6.03699	5.88473	7.62548	5.96086	7.62548	1.66462	0.0279216	0.273362	11	121452202	121633693
ENSG00000160469	BRSK1	7.69169	8.04999	9.52985	7.87084	9.52985	1.65901	0.00260821	0.0520586	19	55282071	55312533
ENSG00000135740	SLC9A5	6.29275	5.67708	7.63962	5.98492	7.63962	1.6547	0.0439493	0.356369	16	67237682	67272190
ENSG00000267279	RP11-879F14.2	11.9449	11.2991	13.2731	11.622	13.2731	1.65113	0.000651824	0.0181466	18	61585745	61606916
ENSG00000183770	FOXL2	6.8036	6.22742	8.16465	6.51551	8.16465	1.64914	0.0273148	0.270358	3	138944223	138947140
ENSG00000180389	ATP5EP2	11.714	10.7744	12.8916	11.2442	12.8916	1.64741	0.00451966	0.078253	13	27945205	27945590
ENSG00000268895	A1BG-AS1	9.81597	9.75108	11.4245	9.78353	11.4245	1.64098	3.99e-05	0.00167049	19	58347750	58355183
ENSG00000174099	MSRB3	12.7946	12.3854	14.2306	12.59	14.2306	1.64061	6.03e-05	0.00238235	12	65278642	65488244
ENSG00000253948	RP11-410L14.2	9.42788	8.39366	10.5496	8.91077	10.5496	1.63885	0.0151267	0.18592	8	98996762	99013044
ENSG00000100605	ITPK1	9.58888	9.0687	10.9614	9.32879	10.9614	1.63258	0.00108694	0.0269262	14	92936913	93116320
ENSG00000152128	TMEM163	6.32837	6.37239	7.98247	6.35038	7.98247	1.63209	0.019888	0.219105	2	134455758	134719000
ENSG00000171303	KCNK3	12.1948	11.3764	13.4168	11.7856	13.4168	1.63126	0.00235646	0.0486703	2	26692689	26733420
ENSG00000168461	RAB31	12.0244	11.6473	13.4659	11.8358	13.4659	1.63005	6.85e-05	0.00262944	18	9708164	9862551
ENSG00000076344	RGS11	5.90168	6.17566	7.6675	6.03867	7.6675	1.62883	0.0309909	0.291434	16	268300	275980
ENSG00000075643	MOCOS	8.4941	7.99132	9.86085	8.24271	9.86085	1.61814	0.00376483	0.0684263	18	36187518	36272157
ENSG00000185022	MAFF	9.28791	9.02184	10.7641	9.15488	10.7641	1.60922	0.000379603	0.0115387	22	38200766	38216511
ENSG00000123143	PKN1	11.5792	10.8953	12.8439	11.2372	12.8439	1.60669	0.00130843	0.0311378	19	14433052	14471867
ENSG00000176490	DIRAS1	6.72562	7.08378	8.5108	6.9047	8.5108	1.6061	0.0145602	0.181888	19	2714566	2721418
ENSG00000080823	MOK	12.8313	14.16	15.0992	13.4957	15.0992	1.60349	0.0180055	0.20648	14	102224499	102305200
ENSG00000130222	GADD45G	6.39706	6.3952	7.99902	6.39613	7.99902	1.60288	0.0215034	0.230623	9	89605012	89606555
ENSG00000109511	ANXA10	6.27461	6.95154	8.21274	6.61308	8.21274	1.59967	0.0336361	0.304723	4	168092514	168187690
ENSG00000152223	EPG5	11.1423	12.0494	13.1943	11.5958	13.1943	1.59849	0.00413797	0.0735318	18	45847608	45967274
ENSG00000121410	A1BG	12.2955	13.6501	14.5679	12.9728	14.5679	1.59509	0.0227264	0.239122	19	58345177	58353499
ENSG00000251493	FOXD1	10.4482	11.9004	12.7685	11.1743	12.7685	1.59419	0.0357196	0.316088	5	73444826	73448362
ENSG00000119514	GALNT12	7.69851	6.71823	8.80238	7.20837	8.80238	1.59401	0.0429841	0.351304	9	98807698	98850081
ENSG00000149257	SERPINH1	12.9881	12.978	14.569	12.9831	14.569	1.58592	2.72e-06	0.000154472	11	75562055	75572783
ENSG00000105497	ZNF175	9.05532	10.035	11.1261	9.54518	11.1261	1.58094	0.0110191	0.150634	19	51571297	51592508
ENSG00000184347	SLIT3	9.69841	10.4003	11.6253	10.0494	11.6253	1.57592	0.00235873	0.0486703	5	168661732	169301129
ENSG00000235109	ZSCAN31	6.67118	6.00823	7.9143	6.3397	7.9143	1.5746	0.0475005	0.372373	6	28324692	28356271
ENSG00000188322	SBK1	6.61461	6.93607	8.34808	6.77534	8.34808	1.57274	0.0189675	0.213564	16	28292518	28323849
ENSG00000108840	HDAC5	8.44627	8.37083	9.98096	8.40855	9.98096	1.57241	0.00106581	0.0265529	17	44076745	44123702
ENSG00000178980	SEPW1	15.3797	15.1841	16.8538	15.2819	16.8538	1.57193	2.34e-07	1.88e-05	19	47778571	47784686
ENSG00000198794	SCAMP5	9.07641	9.0255	10.6226	9.05096	10.6226	1.57168	0.000309846	0.00988071	15	74957218	75021496
ENSG00000118242	MREG	5.87784	5.88473	7.45202	5.88129	7.45202	1.57073	0.0414065	0.345659	2	215942804	216034096
ENSG00000123989	CHPF	12.4611	12.3101	13.9557	12.3856	13.9557	1.57013	1.28e-05	0.000599585	2	219538946	219543787
ENSG00000123643	SLC36A1	8.50191	8.41613	10.0288	8.45902	10.0288	1.56973	0.00100632	0.0255509	5	151437045	151492381
ENSG00000113916	BCL6	7.61446	8.43276	9.59299	8.02361	9.59299	1.56938	0.0163828	0.194805	3	187721376	187745727
ENSG00000257605	RP11-680A11.5	10.4533	10.035	11.8133	10.2442	11.8133	1.5691	0.000410667	0.0123971	12	53298654	53300314
ENSG00000072071	ADGRL1	8.52895	9.51639	10.5893	9.02267	10.5893	1.56665	0.0153599	0.187342	19	14147742	14206187
ENSG00000174938	SEZ6L2	12.4353	12.2924	13.9246	12.3638	13.9246	1.56074	1.37e-05	0.000636972	16	29871158	29899547
ENSG00000134243	SORT1	11.5526	11.9804	13.327	11.7665	13.327	1.56047	0.000173297	0.00596476	1	109309567	109397951
ENSG00000157613	CREB3L1	10.8112	11.7548	12.8363	11.283	12.8363	1.55325	0.00678022	0.10491	11	46277660	46321422
ENSG00000119138	KLF9	8.77142	9.6385	10.7576	9.20496	10.7576	1.55267	0.00959311	0.136799	9	70384596	70414624
ENSG00000109323	MANBA	10.0433	10.1535	11.646	10.0984	11.646	1.54763	7.54e-05	0.00282615	4	102631487	102760994
ENSG00000135926	TMBIM1	12.0884	11.4173	13.2963	11.7529	13.2963	1.54344	0.00171445	0.0385016	2	218274191	218292586
ENSG00000130881	LRP3	8.65001	9.33365	10.5289	8.99183	10.5289	1.53705	0.00557237	0.0900772	19	33177602	33208867
ENSG00000154511	FAM69A	7.32819	6.78882	8.5821	7.0585	8.5821	1.52359	0.0264897	0.263829	1	92832736	92961522
ENSG00000197635	DPP4	11.2651	10.6147	12.4623	10.9399	12.4623	1.52239	0.0020939	0.044569	2	161992240	162074542
ENSG00000176845	METRNL	10.5815	10.3384	11.9778	10.46	11.9778	1.51784	0.000158392	0.00552293	17	83079690	83095119
ENSG00000167106	FAM102A	9.81754	9.45801	11.1547	9.63778	11.1547	1.51694	0.000785517	0.0210043	9	127940578	127980513
ENSG00000272434	RP13-131K19.6	7.32819	7.49615	8.92869	7.41217	8.92869	1.51652	0.00948734	0.135685	3	49029315	49029706
ENSG00000204520	MICA	11.1621	12.5398	13.3638	11.851	13.3638	1.51277	0.0378208	0.326929	6	31399783	31415315
ENSG00000271204	RP11-138A9.1	8.04203	8.25715	9.66216	8.14959	9.66216	1.51258	0.00324346	0.0613667	7	130930208	130932206
ENSG00000010810	FYN	10.6062	11.2709	12.4506	10.9385	12.4506	1.51203	0.00203479	0.0436821	6	111660331	111873452
ENSG00000225177	RP11-390P2.4	9.24662	9.12095	10.6955	9.18379	10.6955	1.51174	0.000518157	0.0150619	6	138692547	138697288
ENSG00000138639	ARHGAP24	9.05532	8.84676	10.4598	8.95104	10.4598	1.50878	0.00100316	0.0255361	4	85475113	86002670
ENSG00000162694	EXTL2	10.6473	10.7569	12.2108	10.7021	12.2108	1.50876	5.66e-05	0.00225749	1	100872371	100895998
ENSG00000198075	SULT1C4	9.48619	8.85911	10.6768	9.17265	10.6768	1.50413	0.00535915	0.087845	2	108377910	108388057
ENSG00000248161	RP11-499E18.1	9.57782	9.10028	10.8426	9.33905	10.8426	1.50356	0.00226547	0.0472463	4	102418601	102450010
ENSG00000166396	SERPINB7	7.80979	8.65692	9.73148	8.23335	9.73148	1.49812	0.021416	0.23058	18	63752934	63805376
ENSG00000125503	PPP1R12C	10.8878	10.6037	12.2404	10.7458	12.2404	1.49465	0.000212667	0.00713188	19	55090912	55117559
ENSG00000253522	MIR3142HG	8.19455	8.69418	9.93726	8.44437	9.93726	1.49289	0.00580389	0.0931746	5	160468267	160487426
ENSG00000272405	RP11-284F21.10	9.24196	8.2129	10.2174	8.72743	10.2174	1.48993	0.0311942	0.292575	1	156641665	156644887
ENSG00000114115	RBP1	10.6385	11.7718	12.6949	11.2051	12.6949	1.48975	0.020427	0.22336	3	139517433	139539829
ENSG00000154122	ANKH	8.44627	8.779	10.0995	8.61264	10.0995	1.48689	0.00269271	0.0530261	5	14704803	14871778
ENSG00000142459	EVI5L	9.31923	9.60466	10.9479	9.46194	10.9479	1.486	0.000720226	0.0195542	19	7830232	7864976
ENSG00000118523	CTGF	14.2108	15.4239	16.3009	14.8173	16.3009	1.48361	0.0150458	0.185356	6	131948175	131951373
ENSG00000197162	ZNF785	7.73877	7.77361	9.23846	7.75619	9.23846	1.48227	0.0064022	0.100257	16	30573739	30585771
ENSG00000232807	RP11-536K7.3	6.31067	6.52495	7.89675	6.41781	7.89675	1.47893	0.037577	0.325757	10	5934269	5945900
ENSG00000082781	ITGB5	11.7283	12.5845	13.6348	12.1564	13.6348	1.47839	0.00607606	0.09688	3	124761947	124901418
ENSG00000196352	CD55	9.24662	9.21368	10.7082	9.23015	10.7082	1.47801	0.000553603	0.0158914	1	207321507	207386804
ENSG00000131242	RAB11FIP4	6.36312	6.54549	7.93165	6.45431	7.93165	1.47734	0.0359305	0.317314	17	31391623	31538217
ENSG00000176658	MYO1D	9.69841	9.84933	11.2482	9.77387	11.2482	1.47438	0.000301432	0.00962989	17	32492521	32877177
ENSG00000227258	SMIM2-AS1	6.47857	6.14907	7.78667	6.31382	7.78667	1.47285	0.0474892	0.372373	13	44110450	44240517
ENSG00000133056	PIK3C2B	6.49434	6.68159	8.05812	6.58796	8.05812	1.47016	0.0325744	0.298965	1	204422627	204494724
ENSG00000100154	TTC28	8.68133	9.58247	10.6011	9.1319	10.6011	1.46922	0.0173684	0.202274	22	27978013	28679865
ENSG00000142173	COL6A2	12.4437	11.9168	13.6467	12.1802	13.6467	1.46646	0.00103952	0.0260817	21	46098096	46132849
ENSG00000168389	MFSD2A	9.79226	8.92721	10.8257	9.35973	10.8257	1.46597	0.0156505	0.189262	1	39955111	39969968
ENSG00000175003	SLC22A1	6.97069	7.09775	8.49921	7.03422	8.49921	1.46499	0.0199031	0.219134	6	160121788	160158718
ENSG00000142327	RNPEPL1	11.5953	10.8256	12.6746	11.2104	12.6746	1.46418	0.00568104	0.0914966	2	240565803	240581372
ENSG00000261052	SULT1A3	7.36295	7.70224	8.99619	7.53259	8.99619	1.4636	0.0137957	0.175589	16	30199227	30204310
ENSG00000115935	WIPF1	9.62154	9.05802	10.8031	9.33978	10.8031	1.46332	0.00459389	0.0790698	2	174559571	174682916
ENSG00000099194	SCD	9.17752	10.0223	11.0626	9.5999	11.0626	1.46269	0.0117323	0.155652	10	100347123	100364834
ENSG00000105048	TNNT1	11.0046	10.4158	12.1673	10.7102	12.1673	1.4571	0.00247772	0.0503555	19	55132793	55149354
ENSG00000105647	PIK3R2	7.6571	8.29402	9.43168	7.97556	9.43168	1.45611	0.0177196	0.205273	19	18153117	18170540
ENSG00000162576	MXRA8	10.8508	10.5232	12.142	10.687	12.142	1.45503	0.000446929	0.0133085	1	1352688	1361777
ENSG00000178776	C5orf46	12.1256	11.2302	13.1322	11.6779	13.1322	1.45432	0.0102803	0.143327	5	147880725	147906538
ENSG00000161638	ITGA5	13.2582	12.5627	14.3586	12.9104	14.3586	1.4482	0.00304297	0.0584563	12	54395260	54419460
ENSG00000100242	SUN2	11.4778	11.1595	12.7655	11.3186	12.7655	1.44684	0.000326199	0.0102347	22	38734724	38794143
ENSG00000109762	SNX25	9.12279	9.35998	10.6862	9.24138	10.6862	1.4448	0.00113465	0.0278138	4	185204236	185370185
ENSG00000167202	TBC1D2B	10.6821	11.2709	12.4189	10.9765	12.4189	1.44237	0.00208351	0.0444559	15	77984035	78077724
ENSG00000105137	SYDE1	11.008	10.7391	12.3156	10.8736	12.3156	1.442	0.000299923	0.00959916	19	15107402	15114988
ENSG00000265778	RP11-17M16.2	7.90131	7.32854	9.05541	7.61493	9.05541	1.44049	0.024857	0.253516	18	76491651	76493918
ENSG00000134030	CTIF	10.383	10.8731	12.054	10.6281	12.054	1.42595	0.00145216	0.0338689	18	48539045	48863217
ENSG00000183580	FBXL7	8.36286	8.85089	10.0261	8.60687	10.0261	1.4192	0.0074831	0.113046	5	15500195	15939795
ENSG00000121236	TRIM6	7.19947	7.56817	8.80238	7.38382	8.80238	1.41856	0.0216741	0.231511	11	5596108	5612958
ENSG00000107554	DNMBP	10.403	9.56497	11.3998	9.984	11.3998	1.41579	0.0142259	0.179631	10	99875576	100009919
ENSG00000206532	RP11-553A10.1	8.7843	8.00621	9.80861	8.39526	9.80861	1.41335	0.0258108	0.260056	3	110888383	110893476
ENSG00000099864	PALM	7.8471	8.33589	9.50109	8.09149	9.50109	1.4096	0.0135212	0.172849	19	708938	748329
ENSG00000072210	ALDH3A2	9.54792	9.08282	10.7199	9.31537	10.7199	1.40448	0.00444071	0.077498	17	19648135	19677598
ENSG00000130768	SMPDL3B	6.72562	6.62482	8.07903	6.67522	8.07903	1.40381	0.0386617	0.331402	1	27934992	27959157
ENSG00000281881	SPRY4-IT1	7.21858	7.54796	8.78658	7.38327	8.78658	1.40331	0.0220447	0.234598	5	142317619	142318322
ENSG00000186111	PIP5K1C	10.9463	11.1933	12.4715	11.0698	12.4715	1.40166	0.000286238	0.00924555	19	3630182	3700479
ENSG00000233117	LINC00702	7.31936	7.68384	8.8996	7.5016	8.8996	1.39801	0.0210078	0.227302	10	4201140	4243912
ENSG00000158023	WDR66	9.29017	8.35927	10.2221	8.82472	10.2221	1.39735	0.0337022	0.305051	12	121917861	122003927
ENSG00000148841	ITPRIP	9.36067	9.05086	10.6029	9.20576	10.6029	1.39716	0.00265126	0.0525428	10	104309697	104338404
ENSG00000110427	KIAA1549L	8.65001	9.14806	10.2954	8.89903	10.2954	1.39633	0.00678308	0.10491	11	33542071	33674102
ENSG00000260456	C16orf95	8.09468	8.25091	9.56177	8.1728	9.56177	1.38897	0.00672593	0.104487	16	87083561	87317420
ENSG00000185420	SMYD3	11.4578	11.3238	12.7797	11.3908	12.7797	1.38892	0.000173444	0.00596476	1	245749341	246507312
ENSG00000082014	SMARCD3	8.96486	9.69933	10.709	9.3321	10.709	1.3769	0.0139291	0.177159	7	151238763	151277896
ENSG00000175482	POLD4	10.8607	10.7087	12.1599	10.7847	12.1599	1.37519	0.000319743	0.0100863	11	67350776	67356972
ENSG00000067715	SYT1	10.1957	10.7525	11.8468	10.4741	11.8468	1.37272	0.00350902	0.0651628	12	78863992	79452008
ENSG00000177337	DLGAP1-AS1	10.722	9.93159	11.6951	10.3268	11.6951	1.36829	0.0135397	0.172959	18	3593731	3598352
ENSG00000164690	SHH	8.76168	8.15394	9.82572	8.45781	9.82572	1.36791	0.0188441	0.212818	7	155799985	155812273
ENSG00000174080	CTSF	8.8285	9.73329	10.6482	9.28089	10.6482	1.36732	0.0267261	0.26573	11	66563462	66568841
ENSG00000146242	TPBG	10.0244	10.8235	11.7901	10.424	11.7901	1.3661	0.012119	0.159456	6	82363205	82370828
ENSG00000136720	HS6ST1	9.14043	8.56436	10.2162	8.8524	10.2162	1.36379	0.0129002	0.166979	2	128236715	128318577
ENSG00000165949	IFI27	8.97333	9.35708	10.526	9.1652	10.526	1.36082	0.00428754	0.0753499	14	94104835	94116698
ENSG00000072195	SPEG	10.2559	10.6171	11.7968	10.4365	11.7968	1.36029	0.00128026	0.0306337	2	219434845	219498287
ENSG00000244486	SCARF2	10.0725	10.5939	11.6904	10.3332	11.6904	1.35725	0.00347945	0.0649214	22	20424584	20437859
ENSG00000198517	MAFK	10.9254	10.4461	12.0408	10.6857	12.0408	1.35502	0.00279284	0.0547303	7	1530713	1543043
ENSG00000158470	B4GALT5	12.213	11.8533	13.3856	12.0332	13.3856	1.35238	0.000858327	0.02257	20	49632944	49713878
ENSG00000269439	CTD-3131K8.2	8.71871	9.18124	10.302	8.94998	10.302	1.35207	0.00754961	0.113659	19	17488989	17511889
ENSG00000101400	SNTA1	8.31927	8.39931	9.70986	8.35929	9.70986	1.35057	0.00619593	0.0980415	20	33407954	33443892
ENSG00000157227	MMP14	13.1735	13.8542	14.8557	13.5138	14.8557	1.34183	0.00390976	0.0701876	14	22836556	22849027
ENSG00000047365	ARAP2	7.03676	7.6463	8.68114	7.34153	8.68114	1.33961	0.0477585	0.373444	4	35948220	36244509
ENSG00000083444	PLOD1	13.524	13.1413	14.6649	13.3326	14.6649	1.33227	0.000702561	0.0191935	1	11934204	11975538
ENSG00000238005	RP11-443B7.1	6.86552	6.82287	8.1744	6.84419	8.1744	1.3302	0.043928	0.356362	1	234957341	234970062
ENSG00000085117	CD82	11.2714	11.9148	12.9223	11.5931	12.9223	1.32922	0.00555377	0.0898593	11	44564426	44620363
ENSG00000184232	OAF	11.0142	10.0278	11.8479	10.521	11.8479	1.32696	0.031793	0.295118	11	120210766	120230332
ENSG00000168621	GDNF	10.5067	10.4944	11.8245	10.5006	11.8245	1.32395	0.000479775	0.0140715	5	37812676	37839686
ENSG00000166313	APBB1	10.0998	10.7525	11.7487	10.4261	11.7487	1.32257	0.00819303	0.121092	11	6395123	6419414
ENSG00000162618	ADGRL4	11.7316	11.1147	12.7388	11.4232	12.7388	1.31569	0.00639211	0.100189	1	78889763	79006718
ENSG00000130309	COLGALT1	11.8466	11.2816	12.8755	11.5641	12.8755	1.31135	0.00486352	0.0818025	19	17555593	17583162
ENSG00000197043	ANXA6	13.5704	12.4429	14.3148	13.0067	14.3148	1.30816	0.0413039	0.34513	5	151100711	151157882
ENSG00000100284	TOM1	10.4227	9.91984	11.4766	10.1713	11.4766	1.30537	0.00586291	0.0939084	22	35299274	35347994
ENSG00000129353	SLC44A2	10.9166	11.1318	12.3279	11.0242	12.3279	1.30369	0.000665218	0.0183447	19	10602456	10644559
ENSG00000267855	NDUFA7	11.7391	11.1965	12.7707	11.4678	12.7707	1.30293	0.00464326	0.0795169	19	8308767	8321396
ENSG00000167191	GPRC5B	9.87135	8.93501	10.7048	9.40318	10.7048	1.30162	0.0411146	0.344152	16	19856690	19886167
ENSG00000162430	SEPN1	11.0751	11.028	12.3504	11.0515	12.3504	1.29886	0.000420419	0.0125832	1	25800175	25818224
ENSG00000188766	SPRED3	9.88188	9.72431	11.0989	9.80309	11.0989	1.29578	0.00180247	0.0399161	19	38388420	38399587
ENSG00000198467	TPM2	18.7397	17.6464	19.4852	18.1931	19.4852	1.29209	0.0260866	0.261897	9	35681991	35691020
ENSG00000135931	ARMC9	11.1416	10.9493	12.3325	11.0455	12.3325	1.28709	0.000805548	0.0213504	2	231198545	231374837
ENSG00000058668	ATP2B4	13.1577	12.4306	14.0751	12.7941	14.0751	1.28096	0.0110513	0.150957	1	203626560	203744081
ENSG00000142910	TINAGL1	12.7176	12.077	13.6767	12.3973	13.6767	1.27937	0.00786131	0.116957	1	31576484	31587686
ENSG00000013288	MAN2B2	10.988	10.7613	12.1538	10.8746	12.1538	1.27917	0.00113545	0.0278138	4	6575174	6623362
ENSG00000232533	AC093673.5	13.458	12.4094	14.2107	12.9337	14.2107	1.27698	0.0375965	0.325757	7	143379691	143380495
ENSG00000128165	ADM2	7.67104	7.31665	8.7706	7.49384	8.7706	1.27676	0.0392065	0.333807	22	50481555	50486440
ENSG00000070404	FSTL3	13.3904	12.4395	14.1912	12.915	14.1912	1.27628	0.0274428	0.270803	19	676364	683399
ENSG00000109066	TMEM104	9.79066	9.39717	10.8699	9.59392	10.8699	1.27594	0.00638472	0.10018	17	74776482	74839779
ENSG00000033100	CHPF2	12.2921	11.6088	13.2212	11.9504	13.2212	1.27073	0.0108616	0.14921	7	151232488	151238827
ENSG00000168994	PXDC1	10.8354	11.4054	12.3904	11.1204	12.3904	1.26997	0.00619922	0.0980415	6	3722613	3752026
ENSG00000133030	MPRIP	12.8118	12.12	13.7335	12.4659	13.7335	1.2676	0.0107452	0.147972	17	17042544	17217679
ENSG00000132535	DLG4	9.42171	9.6504	10.7976	9.53605	10.7976	1.26154	0.00359473	0.0661863	17	7189889	7219702
ENSG00000060069	CTDP1	9.70011	9.91195	11.0665	9.80603	11.0665	1.26049	0.00262089	0.0520586	18	79679800	79756623
ENSG00000241990	PRR34-AS1	12.5286	12.0372	13.5363	12.2829	13.5363	1.2534	0.00428248	0.0753364	22	46053704	46057210
ENSG00000103249	CLCN7	10.2674	10.0314	11.4019	10.1494	11.4019	1.25246	0.0025299	0.0509219	16	1444933	1475580
ENSG00000272068	RP11-284F21.9	7.33696	7.40919	8.62538	7.37307	8.62538	1.25231	0.0372114	0.323896	1	156637782	156641004
ENSG00000188522	FAM83G	10.6026	9.80104	11.4508	10.2018	11.4508	1.24901	0.0271879	0.269711	17	18968788	19004804
ENSG00000156515	HK1	11.921	11.9163	13.1676	11.9186	13.1676	1.24894	0.000445478	0.0132878	10	69269983	69401882
ENSG00000197646	PDCD1LG2	9.77945	9.26411	10.7681	9.52178	10.7681	1.24634	0.0131303	0.16896	9	5510569	5571254
ENSG00000186577	C6orf1	13.0433	12.5373	14.0318	12.7903	14.0318	1.24156	0.00452891	0.0782669	6	34246379	34249470
ENSG00000141644	MBD1	11.4518	10.8983	12.4122	11.175	12.4122	1.23717	0.0081952	0.121092	18	50266881	50281774
ENSG00000225830	ERCC6	8.58524	9.08282	10.0698	8.83403	10.0698	1.23578	0.0188208	0.212692	10	49455367	49539538
ENSG00000173846	PLK3	10.1763	9.50333	11.0744	9.8398	11.0744	1.23455	0.0213014	0.229629	1	44800224	44805990
ENSG00000166025	AMOTL1	11.2047	11.2038	12.4385	11.2042	12.4385	1.23422	0.000715215	0.0194483	11	94706430	94876753
ENSG00000214548	MEG3	14.4594	15.5904	16.2587	15.0249	16.2587	1.23375	0.0361923	0.318503	14	100779409	100861031
ENSG00000034152	MAP2K3	11.968	11.6603	13.0476	11.8141	13.0476	1.23344	0.00188315	0.0410803	17	21284671	21315240
ENSG00000160584	SIK3	9.21368	9.72881	10.704	9.47124	10.704	1.23272	0.0130493	0.168164	11	116843401	117098437
ENSG00000139636	LMBR1L	10.7834	10.4461	11.846	10.6148	11.846	1.23125	0.00350505	0.0651628	12	49096550	49110900
ENSG00000132376	INPP5K	10.1088	9.7817	11.1737	9.94522	11.1737	1.22845	0.00525566	0.0865746	17	1494570	1516888
ENSG00000134369	NAV1	12.0728	11.9241	13.226	11.9984	13.226	1.22756	0.000799684	0.0212832	1	201622884	201826969
ENSG00000145685	LHFPL2	9.54224	10.0332	11.0125	9.78774	11.0125	1.22479	0.010303	0.143455	5	78485214	78770021
ENSG00000198892	SHISA4	12.403	11.9614	13.4037	12.1822	13.4037	1.22148	0.00417888	0.073959	1	201888679	201892306
ENSG00000173530	TNFRSF10D	11.9719	12.7595	13.5857	12.3657	13.5857	1.21995	0.0190289	0.213909	8	23135587	23164030
ENSG00000173548	SNX33	9.34988	9.38867	10.5866	9.36927	10.5866	1.21732	0.00441221	0.0770904	15	75647905	75662301
ENSG00000267534	S1PR2	8.69504	8.98848	10.0567	8.84176	10.0567	1.21494	0.0121033	0.159456	19	10221434	10231272
ENSG00000008853	RHOBTB2	8.40933	8.07139	9.45185	8.24036	9.45185	1.21149	0.0261653	0.262036	8	22987416	23020199
ENSG00000159176	CSRP1	14.9488	13.8213	15.5933	14.385	15.5933	1.20824	0.0492434	0.379873	1	201483529	201509456
ENSG00000146112	PPP1R18	13.5311	12.5658	14.2554	13.0485	14.2554	1.20694	0.0390569	0.332856	6	30676388	30687895
ENSG00000084764	MAPRE3	10.0203	9.95288	11.1924	9.9866	11.1924	1.20578	0.00266337	0.0527232	2	26970611	27027196
ENSG00000164733	CTSB	14.5164	14.0869	15.507	14.3017	15.507	1.20533	0.00167202	0.0376935	8	11842523	11869448
ENSG00000138434	SSFA2	11.3867	11.8247	12.8103	11.6057	12.8103	1.20461	0.00441295	0.0770904	2	181891832	181930738
ENSG00000198925	ATG9A	11.2243	11.1973	12.415	11.2108	12.415	1.2042	0.000988082	0.0252992	2	219209771	219229717
ENSG00000197818	SLC9A8	8.23264	8.87543	9.75603	8.55404	9.75603	1.20199	0.0397764	0.337513	20	49812712	49892242
ENSG00000107331	ABCA2	8.59258	8.49743	9.74626	8.54501	9.74626	1.20125	0.0137187	0.174737	9	137007226	137028922
ENSG00000113140	SPARC	16.608	17.0876	18.0472	16.8478	18.0472	1.19943	0.000932718	0.0241508	5	151661095	151687165
ENSG00000184752	NDUFA12	14.8142	13.7138	15.463	14.264	15.463	1.199	0.0484832	0.376613	12	94897054	95003770
ENSG00000198189	HSD17B11	10.5308	9.78386	11.356	10.1573	11.356	1.1987	0.029489	0.283557	4	87336609	87391386
ENSG00000020129	NCDN	10.3214	10.1751	11.4468	10.2482	11.4468	1.19855	0.00267275	0.0527898	1	35557472	35567274
ENSG00000010818	HIVEP2	9.80337	10.062	11.1305	9.9327	11.1305	1.19781	0.00456495	0.0788038	6	142751466	142945201
ENSG00000130508	PXDN	14.1134	15.0691	15.784	14.5912	15.784	1.1928	0.0258461	0.260077	2	1631886	1744852
ENSG00000204843	DCTN1	12.151	12.3082	13.4218	12.2296	13.4218	1.1922	0.000963936	0.0247896	2	74361153	74392087
ENSG00000090339	ICAM1	10.7673	10.9938	12.0727	10.8806	12.0727	1.19214	0.002168	0.0457927	19	10270834	10286615
ENSG00000176871	WSB2	12.2808	12.006	13.3334	12.1434	13.3334	1.18994	0.00210136	0.0446737	12	118032693	118062430
ENSG00000166311	SMPD1	12.5334	11.7701	13.3412	12.1518	13.3412	1.18944	0.0234746	0.24449	11	6390430	6394998
ENSG00000166886	NAB2	8.80024	8.17387	9.67595	8.48705	9.67595	1.1889	0.0458133	0.365236	12	57088893	57095476
ENSG00000076356	PLXNA2	8.69504	8.72151	9.89662	8.70827	9.89662	1.18835	0.0116632	0.155288	1	208022241	208244320
ENSG00000100422	CERK	9.97611	10.2567	11.3031	10.1164	11.3031	1.18673	0.0046763	0.0799309	22	46684410	46738261
ENSG00000203546	RP11-176H8.1	8.54796	7.99879	9.45984	8.27337	9.45984	1.18647	0.0446988	0.359126	14	31334311	31457441
ENSG00000203739	RP11-296O14.3	8.75842	8.39366	9.76089	8.57604	9.76089	1.18485	0.0237031	0.245927	1	173417792	173461362
ENSG00000169604	ANTXR1	10.5375	10.7257	11.816	10.6316	11.816	1.1844	0.00233181	0.0482852	2	69013177	69249327
ENSG00000214022	REPIN1	10.6821	10.0057	11.5279	10.3439	11.5279	1.18399	0.0236374	0.245584	7	150368188	150374044
ENSG00000008710	PKD1	10.4593	10.6304	11.7281	10.5449	11.7281	1.18328	0.00237055	0.048832	16	2088709	2135898
ENSG00000116786	PLEKHM2	11.4098	11.2413	12.5078	11.3255	12.5078	1.18229	0.00172073	0.0385439	1	15684331	15734769
ENSG00000106636	YKT6	13.6874	12.9771	14.5107	13.3322	14.5107	1.17845	0.016672	0.196909	7	44200967	44214294
ENSG00000133612	AGAP3	11.1939	10.6147	12.0821	10.9043	12.0821	1.17785	0.0142999	0.180048	7	151085830	151144436
ENSG00000148343	FAM73B	8.84396	8.6522	9.92577	8.74808	9.92577	1.17769	0.0146135	0.182165	9	129036620	129072082
ENSG00000063660	GPC1	11.4093	11.2816	12.521	11.3454	12.521	1.17557	0.00155462	0.035877	2	240435670	240468078
ENSG00000166272	WBP1L	10.9991	10.7257	12.0361	10.8624	12.0361	1.17371	0.00361923	0.0663853	10	102743969	102816267
ENSG00000163947	ARHGEF3	8.52128	8.08548	9.47175	8.30338	9.47175	1.16837	0.0375511	0.325757	3	56727417	57079329
ENSG00000100439	ABHD4	9.46435	10.0001	10.8988	9.73224	10.8988	1.16656	0.0179997	0.20648	14	22598236	22613215
ENSG00000069020	MAST4	10.5554	11.1199	12.0037	10.8376	12.0037	1.16602	0.0128882	0.166947	5	66596360	67169595
ENSG00000171346	KRT15	9.36924	9.07578	10.3852	9.22251	10.3852	1.16268	0.0130912	0.168581	17	41513742	41522529
ENSG00000213462	ERV3-1	11.2782	10.442	12.0213	10.8601	12.0213	1.1612	0.0399817	0.338763	7	64990808	65006743
ENSG00000129245	FXR2	11.0731	10.7201	12.0514	10.8966	12.0514	1.1548	0.0060153	0.0959985	17	7591229	7614871
ENSG00000237310	GS1-124K5.4	10.3247	9.99268	11.3126	10.1587	11.3126	1.15385	0.00804502	0.119438	7	66493705	66495474
ENSG00000169902	TPST1	11.2822	10.9386	12.2623	11.1104	12.2623	1.15188	0.00544803	0.0887567	7	66205198	66420543
ENSG00000184182	UBE2F	13.7624	12.8298	14.4462	13.2961	14.4462	1.15012	0.0439981	0.3566	2	237966826	238042782
ENSG00000135631	RAB11FIP5	11.4768	11.4679	12.6222	11.4724	12.6222	1.14981	0.0014766	0.0343475	2	73073381	73156721
ENSG00000122490	PQLC1	10.5778	11.199	12.0374	10.8884	12.0374	1.14906	0.0178383	0.206239	18	79902419	79951664
ENSG00000104611	SH2D4A	11.1107	11.2119	12.307	11.1613	12.307	1.14576	0.00191773	0.0417308	8	19313616	19396218
ENSG00000197324	LRP10	14.2259	13.6549	15.0851	13.9404	15.0851	1.14468	0.00850803	0.124456	14	22871612	22881580
ENSG00000148842	CNNM2	8.16531	8.40494	9.42964	8.28513	9.42964	1.14452	0.0286838	0.278101	10	102918292	103090221
ENSG00000153814	JAZF1	9.64645	10.1833	11.0587	9.91486	11.0587	1.14379	0.0188854	0.213147	7	27830572	28180743
ENSG00000116604	MEF2D	10.4134	10.3819	11.5412	10.3977	11.5412	1.1435	0.00304741	0.0584775	1	156463726	156500828
ENSG00000129473	BCL2L2	9.87587	9.28258	10.7223	9.57922	10.7223	1.14312	0.0296481	0.284463	14	23298789	23311759
ENSG00000155254	MARVELD1	11.3867	11.6485	12.6597	11.5176	12.6597	1.14214	0.00303257	0.0583204	10	97713172	97718152
ENSG00000166452	AKIP1	12.2665	11.928	13.2393	12.0973	13.2393	1.14199	0.00449583	0.0781491	11	8911138	8920084
ENSG00000185340	GAS2L1	10.8834	11.0542	12.1107	10.9688	12.1107	1.14187	0.00263305	0.0522411	22	29306581	29312785
ENSG00000113273	ARSB	9.70689	10.0972	11.0434	9.90206	11.0434	1.14138	0.0113474	0.152858	5	78777208	78986087
ENSG00000164620	RELL2	9.5852	9.09332	10.4806	9.33926	10.4806	1.14133	0.0247803	0.252981	5	141636949	141641077
ENSG00000160767	FAM189B	11.4124	10.925	12.3092	11.1687	12.3092	1.14056	0.0113992	0.153204	1	155247204	155255483
ENSG00000086544	ITPKC	8.55173	8.51316	9.6708	8.53244	9.6708	1.13835	0.0197148	0.217882	19	40717102	40740860
ENSG00000011028	MRC2	12.551	13.2582	14.036	12.9046	14.036	1.13142	0.0209462	0.226775	17	62627400	62693597
ENSG00000204580	DDR1	11.5246	11.7337	12.7582	11.6291	12.7582	1.12908	0.00261812	0.0520586	6	30876420	30900156
ENSG00000221955	SLC12A8	9.09204	8.7439	10.0461	8.91797	10.0461	1.12815	0.0237475	0.246017	3	125082635	125212864
ENSG00000198324	FAM109A	10.1824	9.83271	11.1355	10.0075	11.1355	1.12797	0.0112913	0.152487	12	111360650	111369121
ENSG00000135480	KRT7	13.8814	13.5523	14.8443	13.7168	14.8443	1.12747	0.00257695	0.0515949	12	52232519	52252186
ENSG00000186010	NDUFA13	14.0848	13.8049	15.07	13.9449	15.07	1.12517	0.00160711	0.0367198	19	19515735	19529054
ENSG00000134046	MBD2	11.4688	11.2191	12.4685	11.3439	12.4685	1.12455	0.00404739	0.0722884	18	54151600	54224788
ENSG00000143774	GUK1	17.0914	16.1637	17.7518	16.6276	17.7518	1.12424	0.0303275	0.2887	1	228139961	228148984
ENSG00000108784	NAGLU	9.80811	9.53961	10.7976	9.67386	10.7976	1.12373	0.0110681	0.150974	17	42536171	42544449
ENSG00000148218	ALAD	9.55921	9.575	10.6896	9.5671	10.6896	1.12249	0.00747247	0.112982	9	113386316	113401333
ENSG00000141756	FKBP10	13.4419	12.9212	14.3022	13.1816	14.3022	1.1206	0.0104542	0.145037	17	41812679	41823217
ENSG00000171298	GAA	9.69841	9.7039	10.8211	9.70116	10.8211	1.1199	0.00671626	0.10443	17	80101555	80119879
ENSG00000049323	LTBP1	10.5507	10.9191	11.8536	10.7349	11.8536	1.11872	0.00783742	0.116789	2	32946971	33399509
ENSG00000143786	CNIH3	10.2822	11.1224	11.8203	10.7023	11.8203	1.11794	0.0461666	0.366719	1	224434659	224740549
ENSG00000175115	PACS1	12.0695	12.2905	13.2978	12.18	13.2978	1.11787	0.00260981	0.0520586	11	66070362	66244747
ENSG00000068971	PPP2R5B	10.4093	9.93742	11.2892	10.1733	11.2892	1.11585	0.0176111	0.204309	11	64917552	64934473
ENSG00000198722	UNC13B	9.75676	9.72431	10.851	9.74053	10.851	1.11045	0.00708696	0.108557	9	35161991	35405338
ENSG00000250222	CTC-338M12.5	9.27428	8.78333	10.1386	9.02881	10.1386	1.10984	0.0349615	0.31165	5	181191923	181194429
ENSG00000035862	TIMP2	13.6982	14.2586	15.0877	13.9784	15.0877	1.10934	0.00866783	0.126162	17	78852976	78925387
ENSG00000136478	TEX2	9.24662	9.35998	10.4102	9.3033	10.4102	1.10685	0.0114454	0.153417	17	64147226	64263301
ENSG00000166073	GPR176	11.5488	11.017	12.3878	11.2829	12.3878	1.10487	0.0169052	0.198727	15	39799022	39920892
ENSG00000275832	ARHGAP23	11.0559	10.8454	12.0544	10.9507	12.0544	1.10367	0.00475512	0.0809709	17	38419279	38512392
ENSG00000186716	BCR	11.3931	10.6858	12.1423	11.0394	12.1423	1.10292	0.0341382	0.306894	22	23179703	23318037
ENSG00000100241	SBF1	10.8485	10.2489	11.6504	10.5487	11.6504	1.10167	0.0264867	0.263829	22	50444999	50475024
ENSG00000112033	PPARD	9.56668	9.38583	10.5765	9.47625	10.5765	1.10026	0.0121145	0.159456	6	35342557	35428191
ENSG00000173727	CMB9-22P13.1	10.981	11.5848	12.3825	11.2829	12.3825	1.09965	0.0205714	0.22424	11	65455257	65466720
ENSG00000229227	RP11-38L15.2	8.65352	8.39931	9.62533	8.52641	9.62533	1.09891	0.0317302	0.295014	10	46597917	46612154
ENSG00000105204	DYRK1B	9.68645	9.9159	10.8995	9.80117	10.8995	1.09837	0.00984273	0.138995	19	39825349	39834201
ENSG00000117408	IPO13	10.1554	10.0602	11.2049	10.1078	11.2049	1.09712	0.00621461	0.0981964	1	43946938	43968022
ENSG00000113739	STC2	14.0215	14.0857	15.1499	14.0536	15.1499	1.09627	0.000561743	0.0160537	5	173314712	173329503
ENSG00000151502	VPS26B	10.4041	10.7201	11.6582	10.5621	11.6582	1.09616	0.00812631	0.120378	11	134224644	134247792
ENSG00000167123	CERCAM	11.3713	11.4415	12.502	11.4064	12.502	1.0956	0.00261739	0.0520586	9	128411750	128437351
ENSG00000090020	SLC9A1	10.9427	10.605	11.8691	10.7738	11.8691	1.09526	0.00917406	0.132322	1	27098814	27166981
ENSG00000166562	SEC11C	13.7603	13.7523	14.8495	13.7563	14.8495	1.09321	0.000785609	0.0210043	18	59139476	59158836
ENSG00000103066	PLA2G15	10.6206	10.4074	11.6043	10.514	11.6043	1.09027	0.00674134	0.104541	16	68245303	68261062
ENSG00000181218	HIST3H2A	9.66572	9.91195	10.8781	9.78883	10.8781	1.08925	0.0110834	0.150974	1	228456978	228457873
ENSG00000013016	EHD3	9.92468	10.0567	11.0783	9.99067	11.0783	1.08758	0.0074164	0.112425	2	31234336	31269447
ENSG00000186825	C2orf27B	9.27884	9.7198	10.5857	9.49932	10.5857	1.08636	0.0240343	0.247884	2	131794960	131801661
ENSG00000228436	RP5-864K19.4	8.9042	8.48153	9.77857	8.69287	9.77857	1.0857	0.0414355	0.345736	1	38859999	38919396
ENSG00000146826	C7orf43	8.70523	9.06515	9.96841	8.88519	9.96841	1.08322	0.0297456	0.284931	7	100154419	100158715
ENSG00000110218	PANX1	9.89826	9.93548	10.9975	9.91687	10.9975	1.08064	0.00754749	0.113659	11	94128927	94181972
ENSG00000116525	TRIM62	8.29697	8.02095	9.23846	8.15896	9.23846	1.07949	0.0491862	0.379741	1	33145401	33182059
ENSG00000169992	NLGN2	9.913	10.3833	11.2273	10.1482	11.2273	1.07917	0.0197866	0.218537	17	7404873	7419860
ENSG00000168268	NT5DC2	12.4137	12.9449	13.7566	12.6793	13.7566	1.07733	0.0142993	0.180048	3	52524384	52535054
ENSG00000042445	RETSAT	10.3444	10.5628	11.5274	10.4536	11.5274	1.07384	0.00731345	0.111443	2	85342087	85354620
ENSG00000131446	MGAT1	12.6307	11.9499	13.3636	12.2903	13.3636	1.07335	0.0316206	0.294445	5	180784781	180815652
ENSG00000007047	MARK4	11.0803	11.1537	12.1891	11.117	12.1891	1.07208	0.0036806	0.0671738	19	45079287	45305283
ENSG00000138685	FGF2	11.8626	12.5929	13.2994	12.2278	13.2994	1.07162	0.0343116	0.307821	4	122826707	122898236
ENSG00000017260	ATP2C1	12.3343	12.2817	13.3782	12.308	13.3782	1.07019	0.00253374	0.0509219	3	130850594	131016712
ENSG00000050165	DKK3	12.2457	12.8058	13.5915	12.5257	13.5915	1.06573	0.017897	0.206239	11	11963105	12009769
ENSG00000005238	FAM214B	12.3625	11.9334	13.2097	12.148	13.2097	1.0617	0.0125458	0.163599	9	35104111	35116341
ENSG00000107819	SFXN3	11.6963	11.0755	12.4468	11.3859	12.4468	1.06089	0.0300932	0.28685	10	101031233	101041244
ENSG00000197562	RAB40C	9.15786	8.99969	10.1386	9.07877	10.1386	1.05987	0.0212087	0.22891	16	589356	629272
ENSG00000172375	C2CD2L	8.76818	8.88352	9.8848	8.82585	9.8848	1.05895	0.0244212	0.250774	11	119102197	119118544
ENSG00000175220	ARHGAP1	12.0701	12.0967	13.1423	12.0834	13.1423	1.05894	0.0028511	0.0557442	11	46677079	46700615
ENSG00000175137	SH3BP5L	10.4227	10.2348	11.3873	10.3287	11.3873	1.05853	0.00892411	0.129142	1	248810445	248826633
ENSG00000184887	BTBD6	9.96907	10.6147	11.3485	10.2919	11.3485	1.05663	0.0380331	0.327966	14	105248489	105251093
ENSG00000100379	KCTD17	10.5375	10.0278	11.3388	10.2826	11.3388	1.05617	0.0273615	0.270446	22	37051735	37063390
ENSG00000124067	SLC12A4	11.6778	11.2286	12.5078	11.4532	12.5078	1.05459	0.0160093	0.192043	16	67943473	67969601
ENSG00000163462	TRIM46	8.79707	9.30383	10.1046	9.05045	10.1046	1.05419	0.0437343	0.355283	1	155173786	155184971
ENSG00000171621	SPSB1	9.1075	9.53191	10.3736	9.3197	10.3736	1.0539	0.0306427	0.289555	1	9292879	9369532
ENSG00000128791	TWSG1	11.3291	11.9737	12.705	11.6514	12.705	1.05357	0.0295873	0.284035	18	9334766	9402420
ENSG00000160613	PCSK7	13.6369	13.0932	14.4089	13.3651	14.4089	1.04383	0.0183603	0.209417	11	117204336	117232525
ENSG00000173402	DAG1	12.1062	12.3504	13.27	12.2283	13.27	1.0417	0.00552076	0.0895518	3	49468702	49535618
ENSG00000148848	ADAM12	11.6687	12.248	13.0001	11.9584	13.0001	1.04168	0.0240046	0.247884	10	126012380	126388455
ENSG00000119681	LTBP2	11.9315	11.9532	12.9839	11.9424	12.9839	1.04149	0.00348786	0.0650091	14	74498169	74612378
ENSG00000086062	B4GALT1	12.2121	12.5969	13.444	12.4045	13.444	1.03949	0.0100423	0.140568	9	33104081	33167356
ENSG00000135596	MICAL1	11.1202	10.7042	11.9504	10.9122	11.9504	1.03821	0.017667	0.204799	6	109444061	109465968
ENSG00000166444	ST5	10.823	10.3072	11.6007	10.5651	11.6007	1.03555	0.028573	0.277349	11	8693350	8910951
ENSG00000049239	H6PD	10.0711	10.6364	11.3888	10.3538	11.3888	1.03507	0.0324903	0.298662	1	9234774	9271337
ENSG00000067900	ROCK1	13.0947	12.6285	13.8943	12.8616	13.8943	1.03265	0.0159228	0.191412	18	20946905	21111851
ENSG00000187097	ENTPD5	9.30142	9.05086	10.2079	9.17614	10.2079	1.03177	0.0274987	0.270803	14	73958009	74019399
ENSG00000165424	ZCCHC24	9.14543	9.71074	10.4588	9.42808	10.4588	1.03074	0.047172	0.371585	10	79382324	79445627
ENSG00000117984	CTSD	13.9698	13.5432	14.7868	13.7565	14.7868	1.03026	0.0100268	0.140509	11	1752751	1763992
ENSG00000100417	PMM1	12.1068	11.4646	12.8156	11.7857	12.8156	1.0299	0.0365384	0.319682	22	41576893	41589890
ENSG00000170485	NPAS2	9.92613	10.2093	11.095	10.0677	11.095	1.02734	0.0156868	0.189262	2	100820151	100996829
ENSG00000107816	LZTS2	11.1817	10.7458	11.991	10.9638	11.991	1.02719	0.0201444	0.220958	10	100996617	101007836
ENSG00000101298	SNPH	8.86533	8.85911	9.88924	8.86222	9.88924	1.02702	0.0275582	0.271084	20	1266315	1309328
ENSG00000116584	ARHGEF2	10.9542	10.5865	11.7968	10.7703	11.7968	1.02646	0.0166455	0.196729	1	155946850	156007070
ENSG00000071655	MBD3	11.2472	10.7257	12.0105	10.9864	12.0105	1.02404	0.027874	0.273119	19	1573595	1592801
ENSG00000152377	SPOCK1	12.5389	12.7881	13.6857	12.6635	13.6857	1.02225	0.00595341	0.0950973	5	136975297	137598379
ENSG00000160360	GPSM1	10.3883	9.79462	11.1078	10.0915	11.1078	1.01633	0.0466365	0.368616	9	136327475	136359605
ENSG00000119771	KLHL29	8.66052	8.92329	9.80704	8.79191	9.80704	1.01514	0.0385813	0.331156	2	23385216	23708611
ENSG00000260944	FOXC2-AS1	11.1247	11.5947	12.3733	11.3597	12.3733	1.01365	0.0203368	0.222651	16	86565144	86567761
ENSG00000114554	PLXNA1	11.5072	11.1949	12.3616	11.351	12.3616	1.01058	0.0126812	0.164752	3	126988593	127037392
ENSG00000052795	FNIP2	10.6385	10.3087	11.4835	10.4736	11.4835	1.00993	0.0182902	0.208947	4	158769137	158908049
ENSG00000124574	ABCC10	9.76815	9.8053	10.7952	9.78672	10.7952	1.0085	0.0143645	0.180731	6	43427365	43450430
ENSG00000196576	PLXNB2	12.8016	12.4528	13.6357	12.6272	13.6357	1.00849	0.0117739	0.15585	22	50274978	50307627
ENSG00000176058	TPRN	9.11006	8.71699	9.92143	8.91352	9.92143	1.00791	0.0498231	0.38226	9	137191616	137204193
ENSG00000137409	MTCH1	13.6534	13.7257	14.6974	13.6896	14.6974	1.00784	0.00225777	0.0471978	6	36968140	36986298
ENSG00000149577	SIDT2	9.94633	9.82013	10.8885	9.88323	10.8885	1.00525	0.0154374	0.187612	11	117178732	117197445
ENSG00000144567	FAM134A	11.3081	11.7123	12.5145	11.5102	12.5145	1.00435	0.0162653	0.193557	2	219176224	219185479
ENSG00000129691	ASH2L	10.0312	9.85756	10.9479	9.94437	10.9479	1.00357	0.0164143	0.195047	8	38105241	38144076
ENSG00000059122	FLYWCH1	10.773	10.505	11.6412	10.639	11.6412	1.00222	0.0145911	0.182115	16	2911936	2951208
ENSG00000182087	TMEM259	12.2222	12.2295	13.2272	12.2259	13.2272	1.0013	0.00464706	0.0795169	19	1009647	1021179
ENSG00000128059	PPAT	10.4573	10.3236	9.38417	10.3905	9.38417	-1.00631	0.0169572	0.199071	4	56393361	56435615
ENSG00000261732	LA16c-431H6.6	9.8653	9.93159	8.89076	9.89844	8.89076	-1.00768	0.022949	0.240014	16	1632258	1686715
ENSG00000159263	SIM2	11.3622	10.6483	9.99065	11.0053	9.99065	-1.01463	0.04058	0.341523	21	36699132	36749917
ENSG00000100311	PDGFB	12.4266	12.617	11.5001	12.5218	11.5001	-1.02172	0.0055043	0.0893889	22	39223358	39244751
ENSG00000132646	PCNA	12.0196	11.3503	10.6587	11.685	10.6587	-1.02631	0.0298236	0.285367	20	5114952	5126626
ENSG00000143742	SRP9	14.7672	14.9953	13.8481	14.8813	13.8481	-1.03315	0.00181347	0.0400082	1	225777812	225790466
ENSG00000114529	C3orf52	12.0635	11.486	10.7405	11.7748	10.7405	-1.03426	0.0223772	0.237212	3	112086334	112131004
ENSG00000108055	SMC3	12.5481	12.3624	11.4179	12.4553	11.4179	-1.03741	0.0052989	0.0871017	10	110567690	110604636
ENSG00000153147	SMARCA5	13.0449	13.6779	12.3216	13.3614	12.3216	-1.03981	0.0186256	0.211544	4	143513462	143557486
ENSG00000038427	VCAN	15.3149	15.5273	14.3806	15.4211	14.3806	-1.04046	0.000938352	0.0242382	5	83471464	83582303
ENSG00000115750	TAF1B	10.587	10.3574	9.43168	10.4722	9.43168	-1.04055	0.0152204	0.186288	2	9843353	9934416
ENSG00000075711	DLG1	14.4113	15.2743	13.8011	14.8428	13.8011	-1.04167	0.0238191	0.246613	3	197042559	197299300
ENSG00000109576	AADAT	8.81287	8.89556	7.81187	8.85422	7.81187	-1.04235	0.0489467	0.378517	4	170060221	170091699
ENSG00000172795	DCP2	11.3671	11.8783	10.5793	11.6227	10.5793	-1.04342	0.0168118	0.19807	5	112976701	113020970
ENSG00000251602	RP11-521B24.3	9.35851	9.35126	8.3088	9.35488	8.3088	-1.04609	0.0300498	0.286592	14	105416883	105419739
ENSG00000187164	SHTN1	11.5365	11.969	10.7056	11.7528	10.7056	-1.04711	0.0123803	0.161923	10	116881481	117126586
ENSG00000149346	SLX4IP	9.46235	9.22327	8.29099	9.34281	8.29099	-1.05182	0.0347119	0.310144	20	10435302	10636829
ENSG00000180992	MRPL14	16.4258	16.6846	15.5025	16.5552	15.5025	-1.05273	0.000562004	0.0160537	6	44113453	44127457
ENSG00000165527	ARF6	13.6943	14.8345	13.2107	14.2644	13.2107	-1.05373	0.0436652	0.355283	14	49893091	49897054
ENSG00000278882	AC253572.1	8.8347	9.11409	7.92011	8.9744	7.92011	-1.05429	0.0472497	0.371773	1	120723922	120793877
ENSG00000164167	LSM6	13.306	13.2629	12.2279	13.2844	12.2279	-1.05652	0.0025174	0.0508085	4	146175684	146200000
ENSG00000156113	KCNMA1	13.4775	13.2475	12.3059	13.3625	12.3059	-1.05659	0.00418449	0.0739836	10	76869600	77638595
ENSG00000138780	GSTCD	10.1787	10.5102	9.28193	10.3445	9.28193	-1.06252	0.0170144	0.199342	4	105708777	105847728
ENSG00000137285	TUBB2B	12.192	11.5012	10.7817	11.8466	10.7817	-1.06487	0.0249807	0.254511	6	3224260	3231730
ENSG00000157426	AASDH	10.8893	11.4726	10.1148	11.181	10.1148	-1.06619	0.0207826	0.225561	4	56338286	56387508
ENSG00000108064	TFAM	12.4656	11.6455	10.9879	12.0555	10.9879	-1.06766	0.0318685	0.295295	10	58385021	58399221
ENSG00000189180	ZNF33A	10.9873	11.862	10.3555	11.4247	10.3555	-1.06915	0.0367015	0.320891	10	38010649	38065088
ENSG00000148153	INIP	11.3649	11.4422	10.3339	11.4035	10.3339	-1.06962	0.00469537	0.080109	9	112683925	112718236
ENSG00000169047	IRS1	11.6179	11.8326	10.6543	11.7252	10.6543	-1.07092	0.00516436	0.0853702	2	226731316	226799759
ENSG00000132780	NASP	12.9923	12.2433	11.5454	12.6178	11.5454	-1.07243	0.0250641	0.254786	1	45583845	45618904
ENSG00000106829	TLE4	11.5101	12.5777	10.9698	12.0439	10.9698	-1.07412	0.0452718	0.362567	9	79571772	79726882
ENSG00000120093	HOXB3	11.175	12.0871	10.5534	11.6311	10.5534	-1.07769	0.0364633	0.319605	17	48548869	48604912
ENSG00000204175	GPRIN2	9.65173	9.36865	8.43173	9.51019	8.43173	-1.07845	0.0281634	0.274825	10	46549043	46555530
ENSG00000138395	CDK15	8.70523	9.02915	7.78667	8.86719	7.78667	-1.08052	0.0483401	0.376315	2	201790460	201895550
ENSG00000182963	GJC1	12.3286	11.9761	11.0717	12.1523	11.0717	-1.08058	0.00739503	0.112298	17	44798447	44830816
ENSG00000214517	PPME1	13.3609	13.8945	12.54	13.6277	12.54	-1.08773	0.0093707	0.134385	11	74171098	74254703
ENSG00000126878	AIF1L	13.5692	13.1099	12.2491	13.3396	12.2491	-1.09046	0.00825438	0.121863	9	131096475	131123152
ENSG00000136014	USP44	8.98453	9.54981	8.1744	9.26717	8.1744	-1.09277	0.0460484	0.366112	12	95516559	95551490
ENSG00000128487	SPECC1	13.1138	13.7603	12.3437	13.437	12.3437	-1.09339	0.01396	0.177424	17	20009343	20319026
ENSG00000240476	LINC00973	14.0118	13.8435	12.8338	13.9276	12.8338	-1.09384	0.00185917	0.04076	3	98981057	98983096
ENSG00000128951	DUT	13.934	13.8285	12.7847	13.8812	12.7847	-1.09652	0.00148954	0.0345311	15	48331010	48343373
ENSG00000182952	HMGN4	9.49209	9.72656	8.50695	9.60933	8.50695	-1.10238	0.0204887	0.223662	6	26538404	26546254
ENSG00000138675	FGF5	12.8039	13.8413	12.2191	13.3226	12.2191	-1.10349	0.0343811	0.30813	4	80266598	80336680
ENSG00000103196	CRISPLD2	12.2083	12.2562	11.1274	12.2322	11.1274	-1.10487	0.00221785	0.0465855	16	84819983	84920768
ENSG00000157168	NRG1	12.4608	12.9185	11.5843	12.6897	11.5843	-1.10538	0.00740807	0.112396	8	31639385	32767959
ENSG00000185215	TNFAIP2	12.5564	12.8562	11.6007	12.7063	11.6007	-1.10563	0.0038623	0.0696923	14	103123441	103137439
ENSG00000165475	CRYL1	10.9019	11.6051	10.1461	11.2535	10.1461	-1.10743	0.0221116	0.234897	13	20403666	20525857
ENSG00000006432	MAP3K9	11.0573	11.6437	10.2396	11.3505	10.2396	-1.1109	0.0153535	0.187342	14	70722525	70809534
ENSG00000085563	ABCB1	11.4618	12.5994	10.9185	12.0306	10.9185	-1.11207	0.043045	0.351474	7	87503632	87713323
ENSG00000149554	CHEK1	11.6967	11.2365	10.3448	11.4666	10.3448	-1.12185	0.0101375	0.141562	11	125625135	125676255
ENSG00000184903	IMMP2L	11.0285	11.2654	10.0234	11.147	10.0234	-1.12358	0.00510737	0.0846674	7	110663050	111562517
ENSG00000171208	NETO2	11.1975	11.7592	10.3544	11.4783	10.3544	-1.1239	0.0126281	0.164306	16	47077702	47143997
ENSG00000196730	DAPK1	11.3708	12.2855	10.704	11.8282	10.704	-1.1242	0.0288097	0.279167	9	87497227	87708633
ENSG00000039139	DNAH5	9.2443	9.13117	8.06338	9.18773	8.06338	-1.12436	0.0250733	0.254786	5	13690330	13944543
ENSG00000107249	GLIS3	12.2859	12.186	11.1097	12.236	11.1097	-1.12625	0.00206859	0.0441912	9	3824126	4348392
ENSG00000177853	ZNF518A	10.801	11.2167	9.87885	11.0088	9.87885	-1.12998	0.00934438	0.134227	10	96129714	96205288
ENSG00000188342	GTF2F2	14.363	14.3726	13.2364	14.3678	13.2364	-1.13148	0.000563639	0.0160742	13	45120514	45284909
ENSG00000125772	GPCPD1	10.0203	11.1035	9.42964	10.5619	9.42964	-1.13228	0.0479491	0.374268	20	5544403	5611026
ENSG00000084207	GSTP1	18.6823	19.5403	17.9774	19.1113	17.9774	-1.13386	0.010081	0.140997	11	67583594	67586660
ENSG00000073711	PPP2R3A	10.7698	11.4068	9.95292	11.0883	9.95292	-1.13537	0.0169879	0.199165	3	135965672	136147891
ENSG00000015133	CCDC88C	9.26971	10.0937	8.54501	9.68172	8.54501	-1.13671	0.0449609	0.361066	14	91271322	91417844
ENSG00000197056	ZMYM1	9.41551	10.099	8.61825	9.75724	8.61825	-1.13898	0.034267	0.307579	1	35059785	35115859
ENSG00000183255	PTTG1IP	15.4672	16.5833	14.8861	16.0253	14.8861	-1.13911	0.0196744	0.217572	21	44849584	44873903
ENSG00000092010	PSME1	14.7927	15.1113	13.8126	14.952	13.8126	-1.13939	0.000995606	0.0254177	14	24136157	24138967
ENSG00000167642	SPINT2	15.9388	16.0933	14.8765	16.016	14.8765	-1.1395	0.000108534	0.00396577	19	38244034	38292614
ENSG00000131944	FAAP24	10.1164	9.59975	8.71826	9.85808	8.71826	-1.13982	0.0246823	0.252569	19	32972208	32978222
ENSG00000160207	HSF2BP	11.1341	11.4456	10.1486	11.2899	10.1486	-1.14129	0.00517685	0.085496	21	43529191	43659493
ENSG00000169715	MT1E	18.2579	17.5409	16.7578	17.8994	16.7578	-1.14158	0.00546032	0.0887567	16	56625474	56627112
ENSG00000196950	SLC39A10	12.6694	13.9214	12.1492	13.2954	12.1492	-1.14623	0.0400488	0.339004	2	195575976	195737702
ENSG00000203668	CHML	10.3346	11.0966	9.56917	10.7156	9.56917	-1.14641	0.0250153	0.254585	1	241628852	241635930
ENSG00000196428	TSC22D2	12.2216	13.259	11.593	12.7403	11.593	-1.14737	0.0298475	0.285439	3	150408334	150466431
ENSG00000122512	PMS2	10.4753	10.9493	9.56362	10.7123	9.56362	-1.14866	0.0117572	0.15585	7	5973238	6009125
ENSG00000152939	MARVELD2	9.66919	8.98848	8.17925	9.32884	8.17925	-1.14959	0.0432829	0.352924	5	69415111	69444330
ENSG00000105997	HOXA3	11.9574	11.8025	10.7248	11.8799	10.7248	-1.15509	0.00216967	0.0457927	7	27106183	27152581
ENSG00000253729	PRKDC	13.8091	14.41	12.9474	14.1096	12.9474	-1.16217	0.00638583	0.10018	8	47773107	47960183
ENSG00000213625	LEPROT	15.2284	15.7721	14.3376	15.5003	14.3376	-1.16269	0.00230769	0.0478424	1	65420586	65436007
ENSG00000106785	TRIM14	9.04732	8.77466	7.74803	8.91099	7.74803	-1.16296	0.0320267	0.295952	9	98069274	98119212
ENSG00000164695	CHMP4C	11.7498	11.7292	10.5728	11.7395	10.5728	-1.16666	0.00160789	0.0367198	8	81732433	81759515
ENSG00000092140	G2E3	11.6305	11.9305	10.6128	11.7805	10.6128	-1.16765	0.003127	0.0595488	14	30559122	30620063
ENSG00000072401	UBE2D1	12.1655	13.1181	11.4717	12.6418	11.4717	-1.1701	0.0228983	0.239803	10	58334974	58370753
ENSG00000123975	CKS2	14.7267	13.3068	12.842	14.0167	12.842	-1.17472	0.0419428	0.347489	9	89311197	89316703
ENSG00000189266	PNRC2	12.8822	13.6855	12.1072	13.2838	12.1072	-1.17669	0.0142512	0.179822	1	23959108	23963462
ENSG00000181826	RELL1	9.74198	10.3933	8.89076	10.0676	8.89076	-1.17686	0.0228593	0.239766	4	37590799	37686376
ENSG00000114405	C3orf14	12.7195	12.0831	11.2244	12.4013	11.2244	-1.17691	0.0104608	0.145037	3	62318972	62336213
ENSG00000237819	AC002454.1	11.0128	11.0738	9.86236	11.0433	9.86236	-1.18093	0.00246381	0.0501891	7	92836482	92917187
ENSG00000162664	ZNF326	12.1581	12.4157	11.1021	12.2869	11.1021	-1.18482	0.00186282	0.0407889	1	89995111	90035531
ENSG00000105976	MET	12.856	13.6542	12.0681	13.2551	12.0681	-1.18693	0.0133273	0.170743	7	116672389	116798386
ENSG00000198087	CD2AP	12.9382	13.5168	12.0381	13.2275	12.0381	-1.18942	0.0061216	0.0975176	6	47477788	47627263
ENSG00000272141	RP11-465B22.8	8.30146	8.30611	7.10998	8.30379	7.10998	-1.19381	0.0443644	0.35808	1	1169356	1170343
ENSG00000175183	CSRP2	14.2588	15.4472	13.6584	14.853	13.6584	-1.19457	0.0226096	0.238455	12	76858714	76879060
ENSG00000165389	SPTSSA	13.2009	13.2315	12.019	13.2162	12.019	-1.19727	0.000619002	0.0174826	14	34432788	34462356
ENSG00000262655	SPON1	11.4144	11.8466	10.4327	11.6305	10.4327	-1.19786	0.00457186	0.0788454	11	13962688	14267884
ENSG00000183778	B3GALT5	9.68645	9.6071	8.44387	9.64677	8.44387	-1.2029	0.00966069	0.13742	21	39556441	39673137
ENSG00000198093	ZNF649	9.33463	9.20403	8.06338	9.26933	8.06338	-1.20595	0.0153781	0.187401	19	51889223	51905040
ENSG00000170390	DCLK2	11.0586	12.1868	10.4163	11.6227	10.4163	-1.20639	0.0305265	0.28928	4	150078273	150257457
ENSG00000156876	SASS6	9.83312	9.57749	8.49533	9.70531	8.49533	-1.20998	0.0111738	0.151685	1	100083562	100132955
ENSG00000169570	DTWD2	8.24201	8.76156	7.29111	8.50178	7.29111	-1.21067	0.0484269	0.376553	5	118837321	118988545
ENSG00000179021	C3orf38	10.5824	11.0852	9.62177	10.8338	9.62177	-1.21204	0.00815256	0.120665	3	88149742	88168729
ENSG00000106443	PHF14	13.1219	13.1532	11.9254	13.1376	11.9254	-1.21221	0.000547735	0.0157487	7	10973871	11169630
ENSG00000121957	GPSM2	9.94346	9.52676	8.52229	9.73511	8.52229	-1.21282	0.0150638	0.185406	1	108875349	108934545
ENSG00000228716	DHFR	12.0711	10.605	10.1249	11.338	10.1249	-1.21315	0.0485054	0.376613	5	80626227	80654983
ENSG00000240972	MIF	16.2099	17.0657	15.4219	16.6378	15.4219	-1.21589	0.00538785	0.0882329	22	23894003	23895227
ENSG00000167912	RP11-25K19.1	10.7559	9.97197	9.14241	10.3639	9.14241	-1.22154	0.0225618	0.23838	8	59119039	59121346
ENSG00000135525	MAP7	9.40095	9.53448	8.24548	9.46771	8.24548	-1.22224	0.0108944	0.149279	6	136342280	136550819
ENSG00000170430	MGMT	13.2655	13.2756	12.0468	13.2706	12.0468	-1.22381	0.000455568	0.0135427	10	129467183	129768007
ENSG00000129514	FOXA1	11.4553	11.4124	10.2091	11.4339	10.2091	-1.22477	0.0012081	0.0291857	14	37589983	37596059
ENSG00000164136	IL15	11.2136	10.4406	9.60205	10.8271	9.60205	-1.22509	0.0179256	0.206298	4	141636598	141733987
ENSG00000181381	DDX60L	9.93193	9.81379	8.64654	9.87286	8.64654	-1.22632	0.00669823	0.104242	4	168356734	168537786
ENSG00000203760	CENPW	13.4294	11.8864	11.4301	12.6579	11.4301	-1.22777	0.0444117	0.358132	6	126340173	126348875
ENSG00000198860	TSEN15	12.1419	12.16	10.9185	12.151	10.9185	-1.23248	0.000671432	0.018487	1	184051676	184074212
ENSG00000139211	AMIGO2	14.5166	14.7426	13.396	14.6296	13.396	-1.23357	0.000276977	0.00900704	12	47075706	47079951
ENSG00000213186	TRIM59	9.53273	9.75108	8.40714	9.64191	8.40714	-1.23476	0.00920798	0.132702	3	160432444	160485773
ENSG00000163347	CLDN1	14.7695	15.9364	14.1177	15.353	14.1177	-1.23526	0.0157308	0.189493	3	190305700	190322475
ENSG00000168917	SLC35G2	9.21605	9.12436	7.93165	9.17021	7.93165	-1.23856	0.014128	0.178971	3	136818646	136855892
ENSG00000168116	KIAA1586	10.4881	11.1035	9.55432	10.7958	9.55432	-1.2415	0.010028	0.140509	6	57046531	57055239
ENSG00000091127	PUS7	10.7444	10.703	9.47963	10.7237	9.47963	-1.2441	0.00204029	0.0437466	7	105439660	105522267
ENSG00000163629	PTPN13	10.5375	11.7734	9.91127	11.1554	9.91127	-1.24418	0.0336081	0.304626	4	86594314	86815171
ENSG00000146281	PM20D2	10.5337	10.5988	9.31975	10.5662	9.31975	-1.24649	0.00237213	0.048832	6	89146049	89165565
ENSG00000132522	GPS2	9.90122	11.1835	9.2954	10.5423	9.2954	-1.24695	0.0406679	0.341934	17	7311323	7315564
ENSG00000169515	CCDC8	10.546	10.2629	9.15723	10.4045	9.15723	-1.24725	0.00478443	0.0812099	19	46410371	46413584
ENSG00000197959	DNM3	10.4186	10.505	9.21267	10.4618	9.21267	-1.2491	0.00267225	0.0527898	1	171841497	172418466
ENSG00000236924	RP11-390F4.6	9.17996	8.85501	7.76748	9.01748	7.76748	-1.25	0.0207963	0.22557	9	6645955	6670635
ENSG00000119969	HELLS	11.9217	10.3676	9.89368	11.1446	9.89368	-1.25097	0.0477284	0.373376	10	94501433	94613905
ENSG00000116062	MSH6	10.6206	10.8225	9.46977	10.7216	9.46977	-1.25178	0.00246847	0.0502257	2	47695529	47810101
ENSG00000163006	CCDC138	8.42586	7.99879	6.96026	8.21232	6.96026	-1.25206	0.049252	0.379873	2	108786756	108885477
ENSG00000188171	ZNF626	10.5648	11.3792	9.71988	10.972	9.71988	-1.25213	0.0153486	0.187342	19	20620060	20661596
ENSG00000253293	HOXA10	13.4191	13.1243	12.0193	13.2717	12.0193	-1.25239	0.00104583	0.0261502	7	27170590	27180261
ENSG00000156510	HKDC1	12.1161	11.6667	10.6386	11.8914	10.6386	-1.25284	0.00339534	0.0635549	10	69220302	69267559
ENSG00000164542	KIAA0895	8.26057	8.2129	6.98262	8.23673	6.98262	-1.25411	0.0378886	0.327354	7	36324220	36390125
ENSG00000174842	GLMN	9.60348	9.80955	8.45191	9.70652	8.45191	-1.25461	0.00743162	0.112559	1	92246401	92298987
ENSG00000151849	CENPJ	9.50382	9.27645	8.13501	9.39014	8.13501	-1.25513	0.0116132	0.154775	13	24882283	24922889
ENSG00000247498	RP11-392P7.6	10.6134	10.1518	9.12743	10.3826	9.12743	-1.25519	0.0080732	0.119692	12	12927725	12984645
ENSG00000122861	PLAU	14.4166	14.9213	13.4118	14.669	13.4118	-1.25716	0.00140291	0.0328583	10	73909176	73917497
ENSG00000244687	UBE2V1	11.0345	11.7799	10.1498	11.4072	10.1498	-1.25743	0.0105781	0.146547	20	50081123	50115959
ENSG00000119314	PTBP3	13.5927	14.4061	12.7376	13.9994	12.7376	-1.26181	0.00786203	0.116957	9	112217715	112333667
ENSG00000230453	ANKRD18B	9.63405	8.78765	7.94879	9.21085	7.94879	-1.26206	0.0382512	0.329513	9	33524393	33573009
ENSG00000080839	RBL1	8.04203	7.9457	6.7285	7.99386	6.7285	-1.26536	0.0464625	0.368144	20	36996348	37095995
ENSG00000171234	UGT2B7	12.4043	13.0539	11.4578	12.7291	11.4578	-1.2713	0.00515992	0.0853702	4	69051362	69112987
ENSG00000124813	RUNX2	10.83	11.8682	10.075	11.3491	10.075	-1.27406	0.0204928	0.223662	6	45328156	45664349
ENSG00000029534	ANK1	8.48623	9.49543	7.71502	8.99083	7.71502	-1.27582	0.0488981	0.378517	8	41653219	41896762
ENSG00000185880	TRIM69	9.913	9.15809	8.25928	9.53554	8.25928	-1.27626	0.0258397	0.260077	15	44728987	44767829
ENSG00000105974	CAV1	16.433	17.3526	15.6148	16.8928	15.6148	-1.27794	0.00452938	0.0782669	7	116524784	116561184
ENSG00000276043	UHRF1	10.2811	9.3307	8.5261	9.80589	8.5261	-1.27979	0.0306383	0.289555	19	4903079	4962154
ENSG00000087494	PTHLH	11.5921	10.7667	9.89809	11.1794	9.89809	-1.2813	0.0136355	0.17391	12	27958083	27972705
ENSG00000198729	PPP1R14C	10.7851	10.8444	9.53175	10.8147	9.53175	-1.28298	0.00132323	0.0313221	6	150143075	150250357
ENSG00000103254	FAM173A	12.0018	13.8116	11.6235	12.9067	11.6235	-1.28321	0.0445333	0.358643	16	720580	722601
ENSG00000108511	HOXB6	12.2422	12.1332	10.9025	12.1877	10.9025	-1.28521	0.000474705	0.0139496	17	48595750	48604992
ENSG00000197766	CFD	10.0339	10.2411	8.85181	10.1375	8.85181	-1.28566	0.00367408	0.0671247	19	859642	863630
ENSG00000277462	ZNF670	8.50191	8.95817	7.44399	8.73004	7.44399	-1.28606	0.0275836	0.271156	1	247036783	247078755
ENSG00000132846	ZBED3	9.71868	10.1635	8.65353	9.94108	8.65353	-1.28756	0.00835306	0.123113	5	77072071	77087323
ENSG00000198919	DZIP3	10.0149	10.8309	9.13494	10.4229	9.13494	-1.28794	0.016258	0.193557	3	108589681	108694846
ENSG00000169252	ADRB2	10.079	10.4003	8.95154	10.2397	8.95154	-1.28813	0.00437967	0.076815	5	148825244	148828687
ENSG00000256073	URB1-AS1	10.3509	9.81379	8.79292	10.0824	8.79292	-1.28944	0.0103058	0.143455	21	32393129	32393960
ENSG00000173193	PARP14	10.899	11.0826	9.69977	10.9908	9.69977	-1.29101	0.00130138	0.0310967	3	122680617	122730840
ENSG00000136108	CKAP2	12.5962	12.1272	11.0678	12.3617	11.0678	-1.29386	0.00239129	0.0489985	13	52455428	52476628
ENSG00000178078	STAP2	11.7802	11.7625	10.4767	11.7714	10.4767	-1.2947	0.000462996	0.0136709	19	4324042	4342786
ENSG00000184922	FMNL1	9.95348	8.85911	8.10983	9.40629	8.10983	-1.29646	0.0420417	0.34798	17	45221443	45247320
ENSG00000197576	HOXA4	10.2639	9.32477	8.49533	9.79436	8.49533	-1.29903	0.0280646	0.27422	7	27128506	27130799
ENSG00000001617	SEMA3F	9.65699	9.5725	8.31321	9.61474	8.31321	-1.30153	0.00552877	0.0895518	3	50155044	50189075
ENSG00000143036	SLC44A3	10.2856	9.42515	8.55251	9.85539	8.55251	-1.30288	0.0233809	0.243945	1	94820341	94895246
ENSG00000160886	LY6K	11.6211	10.3147	9.6639	10.9679	9.6639	-1.30399	0.0319201	0.295295	8	142700110	142705127
ENSG00000246851	RP11-544A12.8	9.1329	9.30684	7.9143	9.21987	7.9143	-1.30556	0.00973853	0.137968	9	131189909	131194205
ENSG00000204540	PSORS1C1	12.1347	11.9182	10.719	12.0265	10.719	-1.30746	0.000648534	0.0181466	6	31114749	31140092
ENSG00000277268	RP11-445F12.1	12.0176	10.3805	9.89072	11.199	9.89072	-1.3083	0.0423691	0.348889	17	36861673	36936661
ENSG00000145416	2019-03-01	7.99847	8.6522	7.01553	8.32533	7.01553	-1.3098	0.0453584	0.362929	4	163524297	164384050
ENSG00000171843	MLLT3	12.6435	12.0489	11.0361	12.3462	11.0361	-1.31013	0.00383794	0.0693955	9	20341664	20622543
ENSG00000142197	DOPEY2	11.7661	11.9192	10.5289	11.8427	10.5289	-1.31378	0.000458405	0.0135581	21	36156781	36294274
ENSG00000102554	KLF5	9.52891	9.88602	8.39051	9.70747	8.39051	-1.31695	0.00704687	0.108038	13	73054975	73077542
ENSG00000116701	NCF2	12.5016	11.4159	10.6412	11.9588	10.6412	-1.31755	0.017613	0.204309	1	183555562	183590876
ENSG00000214900	LINC01588	11.7774	10.1417	9.64123	10.9596	9.64123	-1.31834	0.0426756	0.349924	14	49927570	50092643
ENSG00000154027	AK5	12.6694	12.6237	11.3274	12.6465	11.3274	-1.31917	0.000226944	0.00752433	1	77282050	77559969
ENSG00000175548	ALG10B	8.12537	8.67567	7.07918	8.40052	7.07918	-1.32135	0.036545	0.319682	12	38316577	38329728
ENSG00000225511	LINC00475	9.17752	9.99455	8.26385	9.58603	8.26385	-1.32218	0.0220567	0.234598	9	92141297	92160114
ENSG00000136156	ITM2B	15.394	16.6767	14.7126	16.0354	14.7126	-1.32272	0.0114501	0.153417	13	48233157	48270357
ENSG00000250548	RP11-47I22.2	9.39046	8.85089	7.79301	9.12067	7.79301	-1.32766	0.0189817	0.213564	14	61556312	61570653
ENSG00000204936	CD177	7.8654	7.88254	6.54533	7.87397	6.54533	-1.32864	0.0411464	0.344152	19	43353658	43363172
ENSG00000139679	LPAR6	7.82856	8.41613	6.79319	8.12235	6.79319	-1.32916	0.0463966	0.367879	13	48389566	48444704
ENSG00000163840	DTX3L	9.96059	9.82223	8.55996	9.89141	8.55996	-1.33145	0.00337275	0.0633328	3	122564237	122575203
ENSG00000108448	TRIM16L	13.4295	13.9362	12.3477	13.6828	12.3477	-1.33514	0.00127176	0.0305553	17	18697997	18736118
ENSG00000212724	KRTAP2-3	14.4908	15.1036	13.462	14.7972	13.462	-1.33515	0.00130657	0.0311359	17	41059239	41060114
ENSG00000131389	SLC6A6	11.4113	12.8211	10.7809	12.1162	10.7809	-1.33527	0.0263247	0.262661	3	14402575	14489349
ENSG00000137880	GCHFR	13.0586	11.1876	10.7873	12.1231	10.7873	-1.33577	0.0423554	0.348889	15	40764019	40767710
ENSG00000137563	GGH	12.696	13.6909	11.8544	13.1935	11.8544	-1.3391	0.0103997	0.144418	8	63015078	63039171
ENSG00000118785	SPP1	15.7257	14.5774	13.8103	15.1515	13.8103	-1.34121	0.010123	0.141472	4	87975649	87983426
ENSG00000104889	RNASEH2A	11.7064	10.3162	9.66908	11.0113	9.66908	-1.34224	0.0306161	0.289555	19	12806579	12813638
ENSG00000197568	HHLA3	12.2276	10.4812	10.0085	11.3544	10.0085	-1.34589	0.0402699	0.340219	1	70354804	70385339
ENSG00000108960	MMD	11.0278	11.0059	9.66562	11.0169	9.66562	-1.35123	0.000569362	0.0161586	17	55392612	55421992
ENSG00000198521	ZNF43	9.13792	8.73051	7.5822	8.93421	7.5822	-1.35201	0.0162017	0.193438	19	21804948	21852125
ENSG00000018408	WWTR1	14.5594	13.9071	12.8796	14.2332	12.8796	-1.35368	0.00229134	0.0476019	3	149517234	149736714
ENSG00000121900	TMEM54	13.0428	13.3523	11.8437	13.1975	11.8437	-1.35378	0.000375114	0.0114221	1	32894593	32901438
ENSG00000104356	POP1	12.1316	10.7678	10.0931	11.4497	10.0931	-1.35659	0.0258027	0.260056	8	98117296	98159834
ENSG00000184110	EIF3C	8.6882	9.36865	7.6675	9.02842	7.6675	-1.36093	0.0219441	0.233684	16	28688557	28735730
ENSG00000181019	NQO1	15.2095	13.2406	12.8635	14.225	12.8635	-1.36158	0.0349451	0.31165	16	69706995	69726951
ENSG00000247134	RP11-11N9.4	11.6535	11.672	10.2998	11.6627	10.2998	-1.3629	0.000249868	0.0081762	8	32996177	33044855
ENSG00000122592	HOXA7	13.2938	12.9178	11.7425	13.1058	11.7425	-1.36325	0.000655981	0.0182133	7	27153715	27157936
ENSG00000111846	GCNT2	11.5629	11.1761	10.003	11.3695	10.003	-1.36649	0.00137206	0.0323449	6	10492222	10629368
ENSG00000112699	GMDS	11.4325	11.488	10.0931	11.4602	10.0931	-1.3671	0.000297885	0.00956745	6	1623805	2245692
ENSG00000107518	ATRNL1	8.43406	8.68032	7.18903	8.55719	7.18903	-1.36816	0.0182988	0.208947	10	115093364	115948992
ENSG00000079931	MOXD1	12.0339	13.0777	11.1864	12.5558	11.1864	-1.3694	0.0109163	0.149462	6	132296054	132401545
ENSG00000116663	FBXO6	9.0149	9.40562	7.83663	9.21026	7.83663	-1.37363	0.00980634	0.138653	1	11664123	11674354
ENSG00000189403	HMGB1	16.5984	15.9222	14.8863	16.2603	14.8863	-1.37402	0.000779318	0.0208998	13	30456703	30617597
ENSG00000170006	TMEM154	10.689	10.7223	9.33069	10.7057	9.33069	-1.37498	0.000675113	0.0185593	4	152618631	152680165
ENSG00000142856	ITGB3BP	10.7551	10.9929	9.49722	10.874	9.49722	-1.37679	0.000861499	0.0226195	1	63440769	63593721
ENSG00000087586	AURKA	12.5861	10.6256	10.2244	11.6058	10.2244	-1.38142	0.040954	0.34368	20	56369388	56392337
ENSG00000160124	CCDC58	12.2041	11.199	10.3197	11.7015	10.3197	-1.38179	0.0113887	0.15318	3	122359590	122383231
ENSG00000163362	C1orf106	11.9166	10.8943	10.022	11.4055	10.022	-1.38344	0.0126065	0.164147	1	200891047	200915735
ENSG00000197013	ZNF429	8.59988	9.5973	7.71502	9.09859	7.71502	-1.38357	0.0314072	0.293631	19	21496681	21556270
ENSG00000138772	ANXA3	14.4846	13.8869	12.8019	14.1857	12.8019	-1.3838	0.00140321	0.0328583	4	78551518	78610451
ENSG00000158528	PPP1R9A	11.4421	12.1289	10.3998	11.7855	10.3998	-1.38573	0.00351097	0.0651628	7	94907201	95296415
ENSG00000166450	PRTG	8.8744	8.77031	7.4359	8.82235	7.4359	-1.38645	0.0107002	0.147772	15	55611545	55743090
ENSG00000104332	SFRP1	11.526	12.6101	10.6811	12.068	10.6811	-1.38697	0.0117673	0.15585	8	41261957	41309497
ENSG00000124795	DEK	14.7778	14.5346	13.2689	14.6562	13.2689	-1.38735	6.5e-05	0.00253938	6	18223867	18264823
ENSG00000088325	TPX2	12.4616	10.1468	9.91563	11.3042	9.91563	-1.38854	0.0491916	0.379741	20	31739270	31801805
ENSG00000162542	TMCO4	8.92761	8.77031	7.46001	8.84896	7.46001	-1.38895	0.0106379	0.147143	1	19682212	19799945
ENSG00000109586	GALNT7	11.9279	12.8071	10.9768	12.3675	10.9768	-1.39073	0.00617948	0.0979312	4	173168752	173323967
ENSG00000143469	SYT14	10.3703	10.4074	8.98793	10.3888	8.98793	-1.4009	0.000846246	0.0222857	1	209938173	210171315
ENSG00000166523	CLEC4E	13.6407	13.3365	12.087	13.4886	12.087	-1.40162	0.00024325	0.00798943	12	8533304	8540963
ENSG00000198039	ZNF273	8.10498	8.75275	7.02634	8.42887	7.02634	-1.40253	0.0300066	0.286492	7	64870171	64930966
ENSG00000172062	SMN1	8.42997	8.4217	7.01553	8.42583	7.01553	-1.4103	0.015986	0.191908	5	70925029	70953942
ENSG00000101000	PROCR	14.1103	12.7551	12.0196	13.4327	12.0196	-1.4131	0.0166233	0.196701	20	35172072	35216240
ENSG00000255150	EID3	9.34771	8.66163	7.5895	9.00467	7.5895	-1.41517	0.0189295	0.213507	12	104303738	104305202
ENSG00000198331	HYLS1	10.079	9.63372	8.43984	9.85636	8.43984	-1.41652	0.00464124	0.0795169	11	125883613	125900648
ENSG00000153044	CENPH	11.2249	9.21368	8.80238	10.2193	8.80238	-1.41691	0.047539	0.372393	5	69189547	69210357
ENSG00000167105	TMEM92	13.1877	12.3515	11.3523	12.7696	11.3523	-1.41731	0.00476692	0.0810932	17	50271405	50281485
ENSG00000156802	ATAD2	11.5943	9.71301	9.23613	10.6537	9.23613	-1.41754	0.0403206	0.340483	8	123319849	123416350
ENSG00000254369	HOXA-AS3	9.60167	8.69418	7.72831	9.14793	7.72831	-1.41961	0.0242619	0.249431	7	27129976	27155928
ENSG00000151725	CENPU	11.2243	9.69244	9.03683	10.4584	9.03683	-1.42154	0.0311669	0.292575	4	184694617	184734133
ENSG00000122862	SRGN	15.1863	15.0134	13.6744	15.0999	13.6744	-1.42547	1.07e-05	0.000512724	10	69088105	69104811
ENSG00000100906	NFKBIA	12.3917	14.3762	11.955	13.384	11.955	-1.42897	0.0314418	0.293797	14	35401510	35404749
ENSG00000113369	ARRDC3	10.2935	12.9736	10.2043	11.6335	10.2043	-1.4292	0.0485304	0.376613	5	91368723	91383359
ENSG00000176894	PXMP2	10.3324	11.7663	9.61999	11.0494	9.61999	-1.42938	0.0226264	0.238488	12	132687605	132704991
ENSG00000026297	RNASET2	14.0203	14.7235	12.9403	14.3719	12.9403	-1.43164	0.00134617	0.03182	6	166929503	166957191
ENSG00000198743	SLC5A3	12.1294	13.6447	11.4503	12.887	11.4503	-1.43674	0.0195349	0.217263	21	34073569	34106260
ENSG00000023697	DERA	13.3086	12.7697	11.5993	13.0391	11.5993	-1.43985	0.000957566	0.0246619	12	15911171	16037282
ENSG00000183780	SLC35F3	7.94211	8.62351	6.84293	8.28281	6.84293	-1.43988	0.0310817	0.291989	1	233904932	234324516
ENSG00000111671	SPSB2	12.0599	11.1595	10.1694	11.6097	10.1694	-1.44029	0.00645626	0.100924	12	6870934	6889358
ENSG00000146757	ZNF92	8.26517	8.96199	7.16967	8.61358	7.16967	-1.44391	0.0234462	0.244339	7	65373798	65401135
ENSG00000156675	RAB11FIP1	13.0848	13.8652	12.0291	13.475	12.0291	-1.44595	0.00248672	0.0503633	8	37858617	37899467
ENSG00000095015	MAP3K1	10.6726	12.7743	10.2751	11.7235	10.2751	-1.44834	0.0360277	0.317812	5	56815573	56896152
ENSG00000145365	TIFA	10.2605	10.9957	9.17918	10.6281	9.17918	-1.44892	0.00498781	0.0831571	4	112274541	112285903
ENSG00000112414	ADGRG6	11.7661	12.3664	10.6164	12.0662	10.6164	-1.44984	0.00136265	0.0321661	6	142301853	142446266
ENSG00000125968	ID1	15.5554	13.7912	13.2215	14.6733	13.2215	-1.45186	0.0199986	0.219954	20	31605282	31606515
ENSG00000145241	CENPC	9.99424	11.0362	9.0633	10.5152	9.0633	-1.4519	0.0122844	0.161269	4	67468747	67545606
ENSG00000232386	RP11-66B24.2	7.96492	7.37518	6.2084	7.67005	6.2084	-1.46165	0.0445809	0.358643	15	100849560	100861756
ENSG00000134516	DOCK2	10.4999	9.86779	8.72159	10.1838	8.72159	-1.46226	0.00488214	0.0819406	5	169637246	170083382
ENSG00000138771	SHROOM3	11.6683	12.8055	10.7745	12.2369	10.7745	-1.46234	0.00911827	0.131626	4	76435099	76783253
ENSG00000273706	LHX1	13.0429	12.1281	11.1173	12.5855	11.1173	-1.46819	0.00479693	0.0812099	17	36936784	36944612
ENSG00000145431	PDGFC	13.0469	13.5054	11.8074	13.2762	11.8074	-1.46877	0.0003395	0.0105389	4	156760453	156971394
ENSG00000136114	THSD1	10.7237	9.79676	8.78658	10.2602	8.78658	-1.47364	0.0102313	0.142758	13	52377166	52406494
ENSG00000198826	ARHGAP11A	10.0998	8.51836	7.83048	9.30906	7.83048	-1.47858	0.0399628	0.338763	15	32615143	32639949
ENSG00000077514	POLD3	9.70011	9.7039	8.22217	9.70201	8.22217	-1.47984	0.00138923	0.0326181	11	74493850	74669117
ENSG00000077152	UBE2T	12.023	10.9132	9.98789	11.4681	9.98789	-1.48021	0.00969228	0.137646	1	202331656	202341980
ENSG00000100285	NEFH	8.70184	8.06429	6.90279	8.38307	6.90279	-1.48028	0.0240032	0.247884	22	29480229	29491390
ENSG00000106025	TSPAN12	9.26742	8.97341	7.63962	9.12041	7.63962	-1.48079	0.00544165	0.0887567	7	120787319	120858402
ENSG00000129534	MIS18BP1	11.1316	11.1343	9.65174	11.133	9.65174	-1.48123	0.000137818	0.004923	14	45203189	45253540
ENSG00000122952	ZWINT	12.1781	9.54472	9.37996	10.8614	9.37996	-1.48144	0.0462389	0.366961	10	56357227	56361275
ENSG00000114638	UPK1B	11.2986	10.8109	9.57286	11.0547	9.57286	-1.48186	0.00119238	0.0289254	3	119173516	119205153
ENSG00000166825	ANPEP	11.7461	9.35708	9.06854	10.5516	9.06854	-1.48303	0.0446182	0.358643	15	89784888	89815401
ENSG00000116675	DNAJC6	8.57786	8.75275	7.17938	8.66531	7.17938	-1.48592	0.00856368	0.125061	1	65248218	65415869
ENSG00000170291	ELP5	14.0192	11.3021	11.1737	12.6607	11.1737	-1.48698	0.0410815	0.344152	17	7251415	7259940
ENSG00000086300	SNX10	10.8766	11.2923	9.59662	11.0844	9.59662	-1.48782	0.000649198	0.0181466	7	26291894	26374329
ENSG00000117632	STMN1	15.5513	15.093	13.8326	15.3221	13.8326	-1.48952	7.41e-05	0.00278362	1	25884180	25906991
ENSG00000137691	C11orf70	8.55549	9.48484	7.53001	9.02017	7.53001	-1.49015	0.0202676	0.222032	11	102047442	102084560
ENSG00000067167	TRAM1	15.3903	17.0491	14.7265	16.2197	14.7265	-1.49327	0.0105928	0.146635	8	70573441	70608387
ENSG00000110944	IL23A	8.21848	8.23203	6.7285	8.22525	6.7285	-1.49676	0.0143761	0.180747	12	56334173	56340410
ENSG00000106003	LFNG	12.4646	12.4268	10.9472	12.4457	10.9472	-1.49844	3.21e-05	0.00138112	7	2512528	2529177
ENSG00000120802	TMPO	12.0227	11.2762	10.1486	11.6495	10.1486	-1.5009	0.00255848	0.0512836	12	98515511	98550379
ENSG00000226752	PSMD5-AS1	10.3103	10.813	9.06068	10.5617	9.06068	-1.50098	0.00148065	0.0343962	9	120824827	120854385
ENSG00000172687	ZNF738	10.0566	11.4346	9.24078	10.7456	9.24078	-1.50484	0.0170431	0.199546	19	21358929	21379302
ENSG00000117009	KMO	7.92477	8.14724	6.53023	8.03601	6.53023	-1.50578	0.0191438	0.214408	1	241532133	241595642
ENSG00000154678	PDE1C	9.41964	11.8456	9.12492	10.6326	9.12492	-1.50768	0.0417342	0.34658	7	31751178	32299329
ENSG00000110723	EXPH5	8.73539	9.26721	7.49154	9.0013	7.49154	-1.50976	0.00868195	0.126263	11	108505430	108593738
ENSG00000261766	RP11-22P6.2	7.99847	8.37083	6.67458	8.18465	6.67458	-1.51007	0.0180608	0.206632	16	28862165	28863340
ENSG00000196653	ZNF502	7.77794	8.4217	6.58971	8.09982	6.58971	-1.51011	0.0273489	0.270446	3	44712642	44723831
ENSG00000173890	GPR160	8.53277	9.27952	7.39481	8.90615	7.39481	-1.51134	0.014873	0.183979	3	170037928	170085403
ENSG00000243725	TTC4	8.81914	9.63372	7.71502	9.22643	7.71502	-1.51141	0.0127391	0.165381	1	54715821	54742657
ENSG00000176406	RIMS2	10.3488	8.53899	7.92589	9.44388	7.92589	-1.51799	0.040189	0.339699	8	103500747	104256094
ENSG00000130045	NXNL2	9.97891	9.89204	8.41539	9.93548	8.41539	-1.52009	0.00073821	0.0199807	9	88535100	88584274
ENSG00000163507	KIAA1524	9.98171	8.77031	7.85493	9.37601	7.85493	-1.52108	0.0229015	0.239803	3	108549868	108589644
ENSG00000171928	TVP23B	10.9535	11.7669	9.83804	11.3602	9.83804	-1.52213	0.00294281	0.0569062	17	18780994	18806714
ENSG00000184809	B3GALT5-AS1	9.12785	9.25479	7.6675	9.19132	7.6675	-1.52382	0.00274953	0.0540627	21	39597146	39612821
ENSG00000258457	RP11-298I3.4	8.07908	8.23835	6.63277	8.15872	6.63277	-1.52595	0.0145159	0.181594	14	22982697	22999078
ENSG00000064012	CASP8	10.0842	8.99969	8.01538	9.54195	8.01538	-1.52658	0.0168616	0.198347	2	201233442	201287711
ENSG00000189283	FHIT	10.3466	10.992	9.14241	10.6693	9.14241	-1.52688	0.00214194	0.0454812	3	59749309	61251459
ENSG00000238117	AP004372.1	8.05271	8.07139	6.53023	8.06205	6.53023	-1.53182	0.01547	0.187768	11	131877679	131897108
ENSG00000138794	CASP6	12.1766	12.1571	10.6333	12.1668	10.6333	-1.53357	2.49e-05	0.00109599	4	109688621	109703583
ENSG00000233237	LINC00472	7.45443	8.45464	6.41984	7.95454	6.41984	-1.5347	0.0418117	0.346937	6	71344343	71420769
ENSG00000243927	MRPS6	14.6769	15.1556	13.3811	14.9163	13.3811	-1.53516	6.39e-05	0.00250333	21	34073223	34143034
ENSG00000138496	PARP9	8.96486	8.81328	7.3525	8.88907	7.3525	-1.53657	0.00462118	0.0794617	3	122527923	122564577
ENSG00000255823	MTRNR2L8	10.7608	11.3547	9.52033	11.0578	9.52033	-1.53743	0.00117546	0.0285941	11	10507886	10509189
ENSG00000138778	CENPE	10.8416	8.73945	8.25009	9.79053	8.25009	-1.54043	0.0403815	0.340666	4	103105805	103198409
ENSG00000187185	CTD-2600O9.1	7.25605	8.35927	6.26424	7.80766	6.26424	-1.54342	0.049072	0.379151	16	57798185	57816946
ENSG00000114346	ECT2	11.1603	12.145	10.1085	11.6526	10.1085	-1.54418	0.00433202	0.0760553	3	172750681	172821474
ENSG00000171357	LURAP1	9.30812	8.62351	7.41961	8.96581	7.41961	-1.54621	0.0112605	0.152391	1	46203333	46221261
ENSG00000134198	TSPAN2	12.4186	12.4667	10.8929	12.4426	10.8929	-1.54971	1.66e-05	0.000760173	1	115048010	115089500
ENSG00000143674	RP5-862P8.2	8.21372	10.4745	7.79301	9.34411	7.79301	-1.5511	0.0476242	0.372894	1	233327767	233385148
ENSG00000259345	RP11-624L4.1	9.77945	10.9845	8.83039	10.382	8.83039	-1.55157	0.0118835	0.157065	15	38865321	39427195
ENSG00000239569	KMT2E-AS1	9.25127	8.14051	7.14013	8.69589	7.14013	-1.55576	0.027296	0.270324	7	105013424	105014321
ENSG00000104450	SPAG1	10.6411	10.8711	9.19841	10.7561	9.19841	-1.55769	0.000197672	0.00669114	8	100157905	100259278
ENSG00000143799	PARP1	14.0641	14.4164	12.68	14.2403	12.68	-1.56029	2.98e-05	0.00129915	1	226360690	226408079
ENSG00000117174	ZNHIT6	12.2107	13.0031	11.0448	12.6069	11.0448	-1.5621	0.00143562	0.0335277	1	85649422	85708433
ENSG00000146267	FAXC	9.43197	9.87794	8.08937	9.65496	8.08937	-1.56559	0.00218067	0.0459144	6	99271168	99350062
ENSG00000184292	TACSTD2	11.3851	10.9269	9.58935	11.156	9.58935	-1.56669	0.000485619	0.0142191	1	58575422	58577773
ENSG00000132965	ALOX5AP	10.3563	11.0188	9.11989	10.6876	9.11989	-1.5677	0.00174927	0.0389346	13	30713477	30764426
ENSG00000163808	KIF15	8.20896	7.52746	6.30029	7.86821	6.30029	-1.56791	0.0297195	0.284836	3	44761716	44873376
ENSG00000082497	SERTAD4	9.23729	9.52676	7.81187	9.38202	7.81187	-1.57015	0.00199156	0.0429114	1	210232798	210246631
ENSG00000147872	PLIN2	13.7022	14.7335	12.6467	14.2179	12.6467	-1.5712	0.00258578	0.0517126	9	19108374	19149290
ENSG00000166896	XRCC6BP1	9.68473	9.16142	7.84886	9.42308	7.84886	-1.57422	0.00392002	0.0702281	12	57941540	57957269
ENSG00000272763	RP11-357H14.17	13.3891	12.8389	11.5397	13.114	11.5397	-1.57425	0.000333712	0.010398	17	48635922	48647023
ENSG00000109452	INPP4B	11.4921	11.3014	9.82107	11.3967	9.82107	-1.57564	6.64e-05	0.00258624	4	142023159	142847432
ENSG00000213214	ARHGEF35	11.3542	10.8371	9.5165	11.0957	9.5165	-1.57915	0.000651192	0.0181466	7	144186082	144195655
ENSG00000227308	AC009502.4	9.31035	7.85812	7.00464	8.58423	7.00464	-1.57959	0.0384063	0.330397	2	219685380	219737937
ENSG00000138668	HNRNPD	13.1802	14.2754	12.1482	13.7278	12.1482	-1.5796	0.00357517	0.0661863	4	82352497	82374503
ENSG00000144395	CCDC150	8.65001	7.89059	6.68825	8.2703	6.68825	-1.58205	0.0218895	0.233386	2	196639553	196763490
ENSG00000224577	LINC01117	10.4309	8.98473	8.12499	9.70783	8.12499	-1.58284	0.021512	0.230623	2	176637709	176655958
ENSG00000114270	COL7A1	12.5486	12.6012	10.9899	12.5749	10.9899	-1.58495	9.84e-06	0.000480518	3	48564072	48595267
ENSG00000122870	BICC1	13.6672	14.8996	12.697	14.2834	12.697	-1.5864	0.00450353	0.0782054	10	58513139	58831437
ENSG00000172031	EPHX4	10.6657	9.93159	8.71158	10.2986	8.71158	-1.58706	0.00313779	0.0596247	1	92029981	92063536
ENSG00000189195	BTBD8	7.16048	8.11326	6.048	7.63687	6.048	-1.58887	0.0428181	0.350274	1	92080304	92147836
ENSG00000128833	MYO5C	8.61798	8.97719	7.20814	8.79759	7.20814	-1.58945	0.00542376	0.0886554	15	52192321	52295798
ENSG00000164236	ANKRD33B	8.8744	10.2474	7.97133	9.56088	7.97133	-1.58955	0.0198561	0.219092	5	10564329	10657816
ENSG00000263470	RP11-160O5.1	11.4502	11.3927	9.83035	11.4215	9.83035	-1.59114	3.08e-05	0.00133417	17	65100811	65111058
ENSG00000076706	MCAM	12.9907	13.9433	11.8747	13.467	11.8747	-1.59232	0.00206852	0.0441912	11	119308528	119321521
ENSG00000127129	EDN2	9.19209	11.4208	8.71158	10.3064	8.71158	-1.59486	0.0327055	0.299092	1	41478774	41484673
ENSG00000076554	TPD52	13.0359	11.8046	10.8249	12.4202	10.8249	-1.59532	0.0064287	0.100582	8	80034744	80231232
ENSG00000261884	CTC-479C5.12	8.50581	7.8663	6.58971	8.18606	6.58971	-1.59635	0.0190552	0.213962	16	67929613	67936017
ENSG00000115738	ID2	12.5564	12.4278	10.8937	12.4921	10.8937	-1.59843	1.31e-05	0.000614457	2	8678844	8684453
ENSG00000174599	TRAM1L1	8.25132	8.71246	6.87914	8.48189	6.87914	-1.60275	0.00962704	0.137052	4	117083553	117085576
ENSG00000176890	TYMS	11.1196	9.79247	8.85181	10.456	8.85181	-1.60421	0.0123019	0.161379	18	657603	673578
ENSG00000178919	FOXE1	9.58336	10.3603	8.36094	9.97184	8.36094	-1.6109	0.0037711	0.0684693	9	97853253	97856715
ENSG00000100557	C14orf105	10.4773	10.5964	8.92581	10.5368	8.92581	-1.61101	0.000115973	0.00421129	14	57469300	57493867
ENSG00000112029	FBXO5	9.82535	7.68384	7.14013	8.75459	7.14013	-1.61446	0.0486491	0.377047	6	152970518	152983579
ENSG00000232759	AC002480.3	12.272	11.246	10.1424	11.759	10.1424	-1.61659	0.00359808	0.0661863	7	22563336	22573996
ENSG00000046889	PREX2	8.0843	10.3862	7.61836	9.23524	7.61836	-1.61688	0.0431905	0.352334	8	67952117	68237030
ENSG00000138642	HERC6	8.40517	9.26721	7.2176	8.83619	7.2176	-1.61859	0.0128235	0.166355	4	88378738	88443111
ENSG00000168916	ZNF608	10.8439	12.5671	10.0854	11.7055	10.0854	-1.6201	0.0148172	0.183661	5	124636912	124748807
ENSG00000233851	LATS2-AS1	7.68484	8.0136	6.22726	7.84922	6.22726	-1.62196	0.0168552	0.198347	13	21005156	21018122
ENSG00000126217	MCF2L	8.33249	7.6175	6.35274	7.97499	6.35274	-1.62225	0.023534	0.244818	13	112894377	113099739
ENSG00000258920	FOXN3-AS1	7.92477	9.0793	6.87914	8.50204	6.87914	-1.62289	0.0259119	0.26059	14	89417353	89419793
ENSG00000110195	FOLR1	9.97048	7.93017	7.32651	8.95032	7.32651	-1.62381	0.0421802	0.348305	11	72189557	72196301
ENSG00000164070	HSPA4L	9.79385	11.0353	8.78975	10.4146	8.78975	-1.62481	0.00928191	0.133548	4	127781820	127840733
ENSG00000133321	RARRES3	10.8057	9.86371	8.70487	10.3347	8.70487	-1.62985	0.00480746	0.0813096	11	63536808	63546462
ENSG00000167880	EVPL	9.92613	8.05716	7.36106	8.99164	7.36106	-1.63058	0.0370878	0.323141	17	76004501	76027452
ENSG00000019582	CD74	10.8199	10.957	9.25233	10.8884	9.25233	-1.63608	5.12e-05	0.0020846	5	150401636	150412929
ENSG00000164985	PSIP1	10.3681	11.1241	9.10976	10.7461	9.10976	-1.63638	0.00163373	0.037106	9	15464065	15511019
ENSG00000214050	FBXO16	9.0312	8.50793	7.13015	8.76957	7.13015	-1.63942	0.00661565	0.103139	8	28348286	28490318
ENSG00000023608	SNAPC1	13.5833	13.1288	11.7136	13.356	11.7136	-1.64245	7.77e-05	0.00290605	14	61762356	61796428
ENSG00000163435	ELF3	9.72537	10.5615	8.48753	10.1434	8.48753	-1.65591	0.00313311	0.0596004	1	202007944	202017188
ENSG00000082397	EPB41L3	10.9592	10.7547	9.2008	10.8569	9.2008	-1.6561	6.82e-05	0.00262944	18	5392380	5630700
ENSG00000237686	RP5-1120P11.1	9.03929	8.65692	7.18903	8.8481	7.18903	-1.65907	0.0039016	0.0701129	6	43995722	44074652
ENSG00000237298	TTN-AS1	9.76328	9.38583	7.9143	9.57455	7.9143	-1.66025	0.00116887	0.0284735	2	178521182	178779963
ENSG00000267458	CTC-425F1.4	9.42171	12.091	9.09444	10.7564	9.09444	-1.66191	0.0313445	0.293358	19	12944117	12944487
ENSG00000155850	SLC26A2	13.7742	13.7814	12.1154	13.7778	12.1154	-1.66238	1.28e-06	7.94e-05	5	149960736	149993455
ENSG00000075213	SEMA3A	11.9254	11.8944	10.2454	11.9099	10.2454	-1.66452	6.49e-06	0.000333857	7	83955776	84492724
ENSG00000008517	IL32	16.8173	18.3246	15.906	17.5709	15.906	-1.66495	0.00326315	0.0616728	16	3065296	3082192
ENSG00000177842	ZNF620	8.58891	8.87948	7.06876	8.7342	7.06876	-1.66543	0.00360008	0.0661863	3	40505991	40518736
ENSG00000109680	TBC1D19	11.7391	12.4261	10.4112	12.0826	10.4112	-1.67139	0.000419383	0.0125736	4	26576436	26755351
ENSG00000172167	MTBP	7.24677	6.87247	5.38715	7.05962	5.38715	-1.67247	0.0353152	0.313299	8	120445399	120542133
ENSG00000170166	HOXD4	10.5384	9.1072	8.14991	9.82281	8.14991	-1.67291	0.0147141	0.183029	2	176151221	176153226
ENSG00000128573	FOXP2	8.21848	8.91147	6.89101	8.56497	6.89101	-1.67396	0.00986566	0.139207	7	114086326	114693772
ENSG00000180071	ANKRD18A	8.44221	8.89556	6.99368	8.66889	6.99368	-1.67521	0.00523757	0.0864175	9	38571357	38620660
ENSG00000105750	ZNF85	9.73867	9.64565	8.01538	9.69216	8.01538	-1.67678	0.00035799	0.0109694	19	20923221	20950697
ENSG00000182010	RTKN2	9.81911	10.8087	8.636	10.3139	8.636	-1.67793	0.00406627	0.0725518	10	62183034	62268707
ENSG00000177990	DPY19L2	9.14543	10.0513	7.92011	9.59836	7.92011	-1.67825	0.00543405	0.088741	12	63558912	63668939
ENSG00000204176	SYT15	8.35856	8.61382	6.80579	8.48619	6.80579	-1.6804	0.00485003	0.0817144	10	46578216	46594173
ENSG00000228358	AC113617.1	6.68498	7.31665	5.31849	7.00081	5.31849	-1.68233	0.0420395	0.34798	4	117360624	117372852
ENSG00000241570	PAQR9-AS1	6.77807	8.08548	5.74204	7.43178	5.74204	-1.68974	0.0496736	0.381925	3	142960649	143001559
ENSG00000139263	LRIG3	9.25127	10.1784	8.02079	9.71481	8.02079	-1.69402	0.00483992	0.081701	12	58872148	58920522
ENSG00000215126	CBWD7	8.89829	8.38798	6.94895	8.64314	6.94895	-1.69419	0.0059379	0.094936	9	41131305	41199261
ENSG00000065675	PRKCQ	7.8471	7.42035	5.93787	7.63372	5.93787	-1.69586	0.0187166	0.211924	10	6427142	6580301
ENSG00000197020	ZNF100	7.96492	8.63792	6.60421	8.30142	6.60421	-1.69722	0.0117152	0.155543	19	21722765	21767628
ENSG00000138182	KIF20B	10.8447	8.87137	8.15975	9.85802	8.15975	-1.69827	0.0240604	0.247941	10	89701609	89774939
ENSG00000054654	SYNE2	9.39466	9.54981	7.7739	9.47224	7.7739	-1.69833	0.000519555	0.0150619	14	63852982	64226433
ENSG00000049249	TNFRSF9	8.27889	10.2395	7.55261	9.25919	7.55261	-1.70658	0.0286368	0.277799	1	7915893	7943165
ENSG00000166165	CKB	14.106	14.0067	12.3482	14.0564	12.3482	-1.70812	6.7e-07	4.47e-05	14	103519658	103523111
ENSG00000171791	BCL2	6.98191	7.6463	5.60461	7.31411	5.60461	-1.70949	0.0304516	0.289166	18	63123345	63320128
ENSG00000269983	RP11-497H16.9	6.98191	8.31809	5.93787	7.65	5.93787	-1.71214	0.0421504	0.34826	5	70449635	70450353
ENSG00000163576	EFHB	7.22804	8.73051	6.26424	7.97927	6.26424	-1.71503	0.0388859	0.332207	3	19879471	19947025
ENSG00000230368	FAM41C	8.44627	9.75989	7.38644	9.10308	7.38644	-1.71664	0.0153969	0.187401	1	868070	876903
ENSG00000136490	LIMD2	14.5251	12.3907	11.738	13.4579	11.738	-1.71987	0.0148126	0.183661	17	63695901	63701172
ENSG00000196754	S100A2	15.0223	13.5298	12.5559	14.276	12.5559	-1.72012	0.00492455	0.082443	1	153561107	153567890
ENSG00000106462	EZH2	10.9406	10.078	8.78021	10.5093	8.78021	-1.72906	0.00193234	0.0419446	7	148807382	148884321
ENSG00000169435	RASSF6	6.84107	7.53775	5.4527	7.18941	5.4527	-1.73671	0.0324198	0.298484	4	73571549	73620631
ENSG00000137462	TLR2	8.10498	8.57938	6.60421	8.34218	6.60421	-1.73798	0.00661547	0.103139	4	153701499	153705699
ENSG00000106526	ACTR3C	8.57416	9.11065	7.09978	8.8424	7.09978	-1.74262	0.00350873	0.0651628	7	150243915	150323725
ENSG00000185950	IRS2	11.4807	12.8598	10.4266	12.1703	10.4266	-1.7437	0.00446183	0.0777893	13	109752697	109786568
ENSG00000115919	KYNU	11.3596	8.85911	8.3652	10.1093	8.3652	-1.74413	0.0276428	0.271156	2	142877497	143055832
ENSG00000100784	RPS6KA5	8.45435	8.96199	6.96026	8.70817	6.96026	-1.74791	0.0039185	0.0702281	14	90847861	91060636
ENSG00000176485	PLA2G16	15.782	15.7757	14.0306	15.7789	14.0306	-1.74828	2.18e-09	2.7e-07	11	63573194	63616883
ENSG00000163463	KRTCAP2	13.5933	14.962	12.527	14.2776	12.527	-1.75067	0.00289201	0.0562962	1	155169407	155173475
ENSG00000188581	KRTAP1-1	8.22322	7.80801	6.26424	8.01561	6.26424	-1.75137	0.00936228	0.134374	17	41040558	41041461
ENSG00000178826	TMEM139	12.4183	12.4521	10.6828	12.4352	10.6828	-1.75246	1.15e-06	7.33e-05	7	143279956	143288048
ENSG00000158825	CDA	12.6613	9.62168	9.38836	11.1415	9.38836	-1.75314	0.0281735	0.274825	1	20588947	20618908
ENSG00000146966	DENND2A	10.9196	11.9266	9.66908	11.4231	9.66908	-1.75399	0.00156428	0.036005	7	140518419	140673993
ENSG00000205744	DENND1C	7.73877	6.68159	5.4527	7.21018	5.4527	-1.75748	0.0410589	0.344152	19	6467206	6482557
ENSG00000171174	RBKS	10.2662	9.52934	8.13999	9.89779	8.13999	-1.7578	0.00171727	0.0385156	2	27781363	27891098
ENSG00000146038	DCDC2	13.6189	14.9364	12.5153	14.2777	12.5153	-1.76242	0.00233736	0.0483431	6	24171755	24358052
ENSG00000134690	CDCA8	10.7584	8.31809	7.7739	9.53823	7.7739	-1.76433	0.0300463	0.286592	1	37692417	37709719
ENSG00000262823	RP13-580F15.2	7.6571	7.84161	5.98294	7.74935	5.98294	-1.76642	0.00992628	0.139571	17	4481965	4486353
ENSG00000078399	HOXA9	12.4454	12.0677	10.4855	12.2566	10.4855	-1.77106	1.66e-05	0.000760173	7	27162434	27175180
ENSG00000179841	AKAP5	8.20417	8.79624	6.7285	8.50021	6.7285	-1.77171	0.0057526	0.092564	14	64465498	64474503
ENSG00000115339	GALNT3	11.0738	12.0157	9.77217	11.5447	9.77217	-1.77258	0.00101209	0.0256518	2	165747590	165794682
ENSG00000184060	ADAP2	8.73207	10.5115	7.84886	9.62178	7.84886	-1.77293	0.0173624	0.202274	17	30906343	30959322
ENSG00000142765	SYTL1	10.6278	9.53705	8.3088	10.0824	8.3088	-1.77362	0.00428105	0.0753364	1	27342019	27353937
ENSG00000254938	RP11-688I9.4	6.88956	7.15232	5.24639	7.02094	5.24639	-1.77456	0.0254827	0.257751	11	126920187	126940659
ENSG00000111728	ST8SIA1	6.75208	8.33589	5.76802	7.54398	5.76802	-1.77596	0.0455724	0.364181	12	22063772	22437041
ENSG00000143815	LBR	11.7641	11.8994	10.0514	11.8317	10.0514	-1.78032	2.16e-06	0.000125754	1	225401501	225428925
ENSG00000068079	IFI35	10.403	8.60895	7.72168	9.50598	7.72168	-1.7843	0.0183639	0.209417	17	43006724	43014456
ENSG00000117791	2019-03-02	6.88956	8.08548	5.68863	7.48752	5.68863	-1.79889	0.0337072	0.305051	1	220748224	220784815
ENSG00000105996	HOXA2	6.58547	6.75396	4.86819	6.66971	4.86819	-1.80152	0.0333053	0.302664	7	27100353	27102811
ENSG00000175643	RMI2	8.24201	8.69877	6.66077	8.47039	6.66077	-1.80962	0.00379826	0.0688911	16	11249618	11351762
ENSG00000234184	RP5-887A10.1	7.73214	7.53775	5.81862	7.63494	5.81862	-1.81632	0.00992323	0.139571	1	80535754	80646788
ENSG00000128710	HOXD10	10.9768	10.8609	9.10212	10.9188	9.10212	-1.81672	7.24e-06	0.000365862	2	176108789	176119942
ENSG00000164109	MAD2L1	11.5629	9.22963	8.57476	10.3963	8.57476	-1.82152	0.0192422	0.214871	4	120055607	120067074
ENSG00000138336	TET1	7.78437	7.24312	5.68863	7.51374	5.68863	-1.82511	0.015675	0.189262	10	68560655	68694482
ENSG00000196420	S100A5	8.05271	8.73051	6.56027	8.39161	6.56027	-1.83133	0.00616983	0.0979312	1	153537146	153541765
ENSG00000238120	LINC01589	9.54035	9.0255	7.44399	9.28292	7.44399	-1.83894	0.00103304	0.0259948	22	45604431	45605621
ENSG00000146049	KAAG1	10.2396	9.77736	8.16953	10.0085	8.16953	-1.83895	0.000244728	0.00802297	6	24356902	24358284
ENSG00000250312	ZNF718	6.91321	7.73837	5.48439	7.32579	5.48439	-1.8414	0.0240408	0.247884	4	124479	163989
ENSG00000104147	OIP5	9.695	6.95154	6.46818	8.32327	6.46818	-1.85509	0.0437245	0.355283	15	41309267	41332621
ENSG00000275055	CTC-471J1.11	6.86552	6.27738	4.71633	6.57145	4.71633	-1.85512	0.038593	0.331156	19	52049006	52049754
ENSG00000147573	TRIM55	14.349	13.8358	12.2361	14.0924	12.2361	-1.8563	9.81e-06	0.000480505	8	66126895	66175487
ENSG00000240065	PSMB9	10.9726	9.9471	8.59667	10.4598	8.59667	-1.86317	0.00175432	0.0389975	6	32844135	32859585
ENSG00000182557	SPNS3	7.94211	8.13374	6.16994	8.03793	6.16994	-1.86798	0.00409264	0.0729479	17	4433687	4488208
ENSG00000196172	ZNF681	6.82869	6.92043	5.00557	6.87456	5.00557	-1.86899	0.0216381	0.231373	19	23739194	23758891
ENSG00000138696	BMPR1B	7.50977	6.32567	5.0486	6.91772	5.0486	-1.86912	0.0422707	0.348685	4	94757967	95158448
ENSG00000176208	ATAD5	9.50187	8.25715	7.00464	8.87951	7.00464	-1.87487	0.00981062	0.138653	17	30831969	30895869
ENSG00000123219	CENPK	11.3962	10.2076	8.92581	10.8019	8.92581	-1.87611	0.00229338	0.0476019	5	65517765	65563171
ENSG00000120756	PLS1	10.706	10.4365	8.68796	10.5713	8.68796	-1.88331	1.82e-05	0.000825465	3	142596386	142713664
ENSG00000231107	LINC01508	10.8431	11.9373	9.50109	11.3902	9.50109	-1.88912	0.00103896	0.0260817	9	90300901	90433505
ENSG00000198185	ZNF334	7.77794	8.87948	6.43613	8.32871	6.43613	-1.89258	0.0115072	0.153948	20	46499629	46513559
ENSG00000140043	PTGR2	9.07379	9.05086	7.16967	9.06233	7.16967	-1.89266	0.000319219	0.0100863	14	73851843	73886827
ENSG00000241935	HOGA1	8.24201	8.44921	6.45225	8.34561	6.45225	-1.89336	0.00205327	0.043971	10	97584322	97612802
ENSG00000159556	ISL2	6.8162	6.80595	4.91545	6.81107	4.91545	-1.89563	0.0214787	0.230623	15	76336723	76342476
ENSG00000189068	VSTM1	11.581	10.6111	9.19602	11.096	9.19602	-1.90001	0.000759975	0.0204436	19	54040824	54063953
ENSG00000270419	CAHM	6.58547	7.39794	5.09039	6.9917	5.09039	-1.90132	0.02737	0.270446	6	163413064	163413960
ENSG00000204228	HSD17B8	9.83776	9.22645	7.62548	9.53211	7.62548	-1.90663	0.000678707	0.0186274	6	33204641	33206831
ENSG00000108176	DNAJC12	8.24667	8.35346	6.38668	8.30007	6.38668	-1.91339	0.00185601	0.04076	10	67796664	67838166
ENSG00000171462	DLK2	5.82895	6.56574	4.2839	6.19734	4.2839	-1.91344	0.0494464	0.380668	6	43450351	43456632
ENSG00000133119	RFC3	10.3236	9.16474	7.8243	9.74418	7.8243	-1.91988	0.00335847	0.0631342	13	33818048	33966558
ENSG00000187094	CCK	6.61461	8.20001	5.48439	7.40731	5.48439	-1.92292	0.0357455	0.316157	3	42257824	42266207
ENSG00000129521	EGLN3	6.87759	8.12695	5.57548	7.50227	5.57548	-1.92679	0.0251831	0.255606	14	33924230	34462774
ENSG00000134955	SLC37A2	8.02041	6.80595	5.48439	7.41318	5.48439	-1.92879	0.0263275	0.262661	11	125063066	125090312
ENSG00000229782	AC118754.4	7.14058	7.93795	5.60461	7.53927	5.60461	-1.93466	0.0142155	0.17963	17	4497393	4499674
ENSG00000169242	EFNA1	11.8144	12.1097	10.022	11.962	10.022	-1.93999	9.2e-07	5.95e-05	1	155127459	155134857
ENSG00000260658	RP11-368L12.1	5.82895	5.97833	3.96248	5.90364	3.96248	-1.94116	0.0489685	0.378518	16	63314263	63618046
ENSG00000038295	TLL1	11.1036	10.9873	9.10212	11.0454	9.10212	-1.94333	1.26e-06	7.82e-05	4	165873257	166103895
ENSG00000188015	S100A3	11.4046	9.85551	8.68455	10.63	8.68455	-1.94549	0.0045117	0.0782082	1	153547328	153549372
ENSG00000138769	CDKL2	9.68645	11.1113	8.45191	10.3989	8.45191	-1.94695	0.00358378	0.0661863	4	75578004	75630716
ENSG00000185565	LSAMP	8.50969	10.4637	7.53758	9.48672	7.53758	-1.94913	0.013159	0.169204	3	115802362	117139389
ENSG00000196584	XRCC2	8.77787	6.90462	5.89135	7.84125	5.89135	-1.9499	0.0316423	0.294445	7	152644778	152676165
ENSG00000171033	PKIA	10.8531	12.0079	9.47963	11.4305	9.47963	-1.95087	0.000917202	0.0237971	8	78516138	78605267
ENSG00000186280	KDM4D	6.98191	6.56574	4.81932	6.77382	4.81932	-1.9545	0.0220705	0.234603	11	94973680	94999518
ENSG00000227507	LTB	13.7521	13.5478	11.6883	13.65	11.6883	-1.96168	7.39e-08	6.65e-06	6	31580524	31582522
ENSG00000226363	HAGLROS	9.57782	8.07139	6.8551	8.8246	6.8551	-1.9695	0.011087	0.150974	2	176177716	176179008
ENSG00000145779	TNFAIP8	13.105	13.1844	11.1743	13.1447	11.1743	-1.97046	2.64e-08	2.59e-06	5	119268691	119399688
ENSG00000272398	CD24	16.2528	16.2427	14.2714	16.2478	14.2714	-1.97634	3.44e-12	6.22e-10	6	106969830	106975627
ENSG00000258315	C17orf49	9.78266	10.3704	8.09964	10.0765	8.09964	-1.97691	0.000137727	0.004923	17	7014494	7017525
ENSG00000111305	GSG1	8.8744	10.0039	7.46001	9.43913	7.46001	-1.97911	0.00289656	0.0563224	12	13083559	13103683
ENSG00000257596	RP11-968A15.2	7.03676	8.02827	5.54575	7.53251	5.54575	-1.98676	0.0156282	0.189167	12	54262614	54279063
ENSG00000198225	FKBP1C	6.7122	6.70002	4.71633	6.70611	4.71633	-1.98978	0.0186203	0.211544	6	63211445	63213024
ENSG00000120051	CFAP58	9.3671	12.4821	8.93444	10.9246	8.93444	-1.99015	0.0178937	0.206239	10	104353763	104455090
ENSG00000257261	RP11-96H19.1	8.98732	8.31809	6.66077	8.65271	6.66077	-1.99193	0.00216094	0.0457186	12	46383678	46876159
ENSG00000259153	RP6-65G23.3	12.224	12.1844	10.2115	12.2042	10.2115	-1.99274	4.97e-08	4.64e-06	14	70810204	70815403
ENSG00000115461	IGFBP5	17.6645	17.1278	15.3918	17.3962	15.3918	-2.00437	8.59e-08	7.53e-06	2	216672104	216695525
ENSG00000235904	RBMS3-AS3	8.97894	7.25564	6.11026	8.11729	6.11026	-2.00703	0.0209144	0.226571	3	29264193	29290726
ENSG00000107014	RLN2	8.50191	8.42724	6.45225	8.46458	6.45225	-2.01233	0.000751167	0.0202688	9	5299867	5304969
ENSG00000258955	LINC00519	6.39706	7.90655	5.131	7.15181	5.131	-2.02081	0.0321466	0.296591	14	51304415	51328386
ENSG00000140379	BCL2A1	6.86552	6.3952	4.60542	6.63036	4.60542	-2.02494	0.0221478	0.235139	15	79960888	79971446
ENSG00000138160	KIF11	8.65703	6.71823	5.66116	7.68763	5.66116	-2.02646	0.0305295	0.28928	10	92593285	92655395
ENSG00000145386	CCNA2	11.2839	7.69307	7.46001	9.48849	7.46001	-2.02848	0.0275228	0.270888	4	121816443	121823933
ENSG00000112149	CD83	9.45632	8.80479	7.09978	9.13055	7.09978	-2.03077	0.000746549	0.0201752	6	14117255	14136918
ENSG00000164509	IL31RA	7.01507	7.75609	5.35323	7.38558	5.35323	-2.03236	0.011532	0.154161	5	55851378	55922853
ENSG00000170099	SERPINA6	5.92513	6.06623	3.96248	5.99568	3.96248	-2.0332	0.0368836	0.32215	14	94304247	94323394
ENSG00000259354	RP11-519G16.3	6.07941	6.25261	4.13212	6.16601	4.13212	-2.03389	0.031273	0.292844	15	45448426	45513767
ENSG00000166035	LIPC	6.50993	5.97833	4.21001	6.24413	4.21001	-2.03413	0.0332134	0.301986	15	58410568	58569843
ENSG00000140534	TICRR	6.77807	5.71383	4.21001	6.24595	4.21001	-2.03595	0.044225	0.357313	15	89575481	89631056
ENSG00000117472	TSPAN1	10.8238	10.8923	8.81178	10.858	8.81178	-2.04625	4.23e-07	3.05e-05	1	46175072	46185958
ENSG00000105894	PTN	9.67093	7.79949	6.68825	8.73521	6.68825	-2.04696	0.0144003	0.180922	7	137227340	137343865
ENSG00000154274	C4orf19	9.87888	8.31809	7.0477	9.09848	7.0477	-2.05078	0.00750961	0.113349	4	37453940	37623495
ENSG00000101017	CD40	13.0147	11.5711	10.2407	12.2929	10.2407	-2.05213	0.00130508	0.0311359	20	46118271	46129863
ENSG00000251432	RP11-420A23.1	10.0473	12.1679	9.04748	11.1076	9.04748	-2.06013	0.00626977	0.098801	4	128292750	128519394
ENSG00000169760	NLGN1	7.50977	6.14907	4.76875	6.82942	4.76875	-2.06067	0.0333479	0.302894	3	173396283	174286644
ENSG00000249459	ZNF286B	7.54046	9.76209	6.58971	8.65128	6.58971	-2.06157	0.0192464	0.214871	17	18658428	18682262
ENSG00000137965	IFI44	8.54039	7.81648	6.11026	8.17843	6.11026	-2.06817	0.00362604	0.0663853	1	78649795	78664078
ENSG00000258102	MAP1LC3B2	8.67443	10.5232	7.53001	9.59881	7.53001	-2.0688	0.00758009	0.11402	12	116548104	116576448
ENSG00000108759	KRT32	6.41374	6.70002	4.48527	6.55688	4.48527	-2.07161	0.0189832	0.213564	17	41459810	41467429
ENSG00000131737	KRT34	9.54224	12.4446	8.92003	10.9934	8.92003	-2.07342	0.0129669	0.167596	17	41377649	41382403
ENSG00000004059	ARF5	12.7218	13.6599	11.1129	13.1909	11.1129	-2.07799	7.15e-05	0.0027019	7	127588344	127591705
ENSG00000272382	CTD-2035E11.4	6.62896	5.9478	4.21001	6.28838	4.21001	-2.07837	0.0311809	0.292575	5	43033715	43034635
ENSG00000162444	RBP7	11.6044	8.79624	8.1149	10.2003	8.1149	-2.0854	0.0144597	0.181235	1	9997205	10016020
ENSG00000162493	PDPN	10.0646	10.8943	8.39051	10.4794	8.39051	-2.08891	0.000155495	0.00544355	1	13583464	13617957
ENSG00000198901	PRC1	12.3644	10.0001	9.09187	11.1823	9.09187	-2.09039	0.00775573	0.116164	15	90966037	90995629
ENSG00000111052	LIN7A	6.54062	6.96685	4.66194	6.75373	4.66194	-2.09179	0.0152445	0.186452	12	80792519	80937925
ENSG00000259342	RP11-519G16.5	9.04465	9.93159	7.39481	9.48812	7.39481	-2.09331	0.000696058	0.0190455	15	45430651	45441808
ENSG00000256229	ZNF486	8.45838	9.31882	6.79319	8.8886	6.79319	-2.09541	0.00149497	0.0345914	19	20167227	20200490
ENSG00000274068	RP11-475E11.9	6.10016	6.66291	4.2839	6.38154	4.2839	-2.09764	0.0251595	0.255513	1	108837659	108963484
ENSG00000279483	AC090498.1	15.2545	15.333	13.1901	15.2937	13.1901	-2.10363	8.12e-12	1.41e-09	7	137513831	137514238
ENSG00000156140	ADAMTS3	9.89826	11.3863	8.53748	10.6423	8.53748	-2.10483	0.0018587	0.04076	4	72280968	72568799
ENSG00000261335	RP11-318A15.2	6.19967	8.2757	5.131	7.23769	5.131	-2.10669	0.0362766	0.318766	17	76671941	76673658
ENSG00000253958	CLDN23	8.01496	6.12198	4.96121	7.06847	4.96121	-2.10726	0.0363027	0.318835	8	8701937	8704106
ENSG00000182795	C1orf116	8.31927	8.31211	6.2084	8.31569	6.2084	-2.10729	0.000624915	0.0176166	1	207018520	207032756
ENSG00000177721	ANXA2R	9.847	9.29172	7.46001	9.56936	7.46001	-2.10935	0.000130106	0.00467609	5	43039080	43043170
ENSG00000137731	FXYD2	11.2402	11.9353	9.47767	11.5878	9.47767	-2.11009	1.54e-05	0.000711204	11	117800843	117828698
ENSG00000056291	NPFFR2	9.22553	11.0729	8.03691	10.1492	8.03691	-2.1123	0.00492573	0.082443	4	72031803	72148067
ENSG00000133315	MACROD1	6.55573	9.50333	5.91479	8.02953	5.91479	-2.11473	0.0340944	0.30682	11	63998557	64166106
ENSG00000112312	GMNN	11.8242	10.7201	9.15723	11.2721	9.15723	-2.11489	0.000348011	0.0107128	6	24774930	24786099
ENSG00000242474	AC093627.9	6.55573	6.09437	4.21001	6.32505	4.21001	-2.11504	0.024402	0.250724	7	135852	149466
ENSG00000170293	CMTM8	7.25605	10.5951	6.79319	8.92559	6.79319	-2.1324	0.0254574	0.257721	3	32238678	32370325
ENSG00000229896	RP11-456H18.2	8.48229	8.72602	6.46818	8.60415	6.46818	-2.13597	0.000313636	0.00996831	6	12007669	12008856
ENSG00000112246	SIM1	9.07379	9.0968	6.94895	9.0853	6.94895	-2.13635	5.18e-05	0.00209741	6	100385014	100464929
ENSG00000132554	RGS22	8.03126	6.88864	5.31849	7.45995	5.31849	-2.14146	0.0132519	0.170026	8	99960935	100131268
ENSG00000100181	TPTEP1	7.12041	10.9211	6.87914	9.02073	6.87914	-2.14159	0.0281294	0.2747	22	16601886	16698742
ENSG00000169679	BUB1	8.9592	6.48299	5.57548	7.72109	5.57548	-2.14561	0.0315096	0.293961	2	110637697	110678114
ENSG00000115165	CYTIP	7.02596	8.17387	5.4527	7.59991	5.4527	-2.14721	0.0111632	0.151659	2	157414618	157488961
ENSG00000100342	APOL1	10.8554	11.1428	8.85181	10.9991	8.85181	-2.14728	3.62e-07	2.71e-05	22	36253009	36267530
ENSG00000172005	MAL	8.59988	11.6708	7.988	10.1354	7.988	-2.14735	0.0148173	0.183661	2	95025676	95053996
ENSG00000137501	SYTL2	11.5971	13.3092	10.3043	12.4531	10.3043	-2.14888	0.00159516	0.0365242	11	85694223	85811159
ENSG00000154529	CNTNAP3B	8.38417	8.26955	6.16994	8.32686	6.16994	-2.15691	0.000494011	0.0144408	9	41890313	42129510
ENSG00000267058	RP11-15A1.3	8.15046	9.95096	6.89101	9.05071	6.89101	-2.1597	0.00753291	0.113602	19	43891803	43901805
ENSG00000254290	RP11-150O12.3	6.16069	5.71383	3.7702	5.93726	3.7702	-2.16706	0.0318018	0.295118	8	37597479	37599858
ENSG00000217825	AC099552.4	7.89539	7.15232	5.35323	7.52385	5.35323	-2.17063	0.00637585	0.10018	7	155196562	155198455
ENSG00000138646	HERC5	6.7909	8.2757	5.35323	7.5333	5.35323	-2.18007	0.0162338	0.193557	4	88457116	88506163
ENSG00000234460	XXyac-YM21GA2.4	8.55924	6.5857	5.38715	7.57247	5.38715	-2.18532	0.0239966	0.247884	9	87864165	87866290
ENSG00000205364	MT1M	8.03665	7.71136	5.68863	7.87401	5.68863	-2.18538	0.00165973	0.0375129	16	56632232	56633986
ENSG00000152582	SPEF2	6.75208	8.46006	5.4203	7.60607	5.4203	-2.18578	0.0188202	0.212692	5	35617843	35814611
ENSG00000272144	CTD-2035E11.5	6.39706	7.5171	4.76875	6.95708	4.76875	-2.18833	0.0180481	0.206623	5	43061394	43062441
ENSG00000248932	RP11-319G6.1	7.93636	8.43827	5.98294	8.18731	5.98294	-2.20438	0.00108325	0.026873	3	139389814	139583319
ENSG00000049130	KITLG	11.1479	10.0314	8.38213	10.5896	8.38213	-2.20752	0.000342525	0.0106141	12	88492792	88580851
ENSG00000113249	HAVCR1	7.87144	7.92234	5.68863	7.89689	5.68863	-2.20826	0.00104095	0.0260817	5	157029412	157059119
ENSG00000146858	ZC3HAV1L	6.38019	8.21931	5.09039	7.29975	5.09039	-2.20936	0.0246551	0.252438	7	139025705	139036029
ENSG00000168679	SLC16A4	10.7802	11.6496	8.99894	11.2149	8.99894	-2.216	3.78e-05	0.00159395	1	110362847	110391082
ENSG00000136881	BAAT	7.15057	9.77736	6.24587	8.46396	6.24587	-2.2181	0.0196668	0.217572	9	101360416	101383519
ENSG00000257831	RP11-596D21.1	6.03699	6.50412	4.04979	6.27055	4.04979	-2.22076	0.0198619	0.219092	14	31248627	31302739
ENSG00000188738	FSIP2	5.49466	6.87247	3.96248	6.18357	3.96248	-2.22109	0.0387178	0.331402	2	185738627	185833290
ENSG00000272894	RP5-1159O4.1	12.0301	10.7906	9.18883	11.4104	9.18883	-2.22153	0.000321376	0.0101015	7	7552461	7566996
ENSG00000008196	TFAP2B	10.9949	11.2135	8.88187	11.1042	8.88187	-2.22232	5.42e-08	4.98e-06	6	50818722	50847613
ENSG00000204531	POU5F1	9.35851	10.7765	7.84276	10.0675	7.84276	-2.22477	0.00127889	0.0306337	6	31164336	31180731
ENSG00000256124	LINC01152	6.05835	5.24654	3.42306	5.65245	3.42306	-2.22939	0.0421152	0.34826	17	72030290	72041297
ENSG00000234883	MIR155HG	9.80021	9.95672	7.64664	9.87846	7.64664	-2.23182	1.71e-06	0.000103143	21	25561908	25575168
ENSG00000246366	LACTB2-AS1	5.69894	6.09437	3.6635	5.89665	3.6635	-2.23315	0.02793	0.273362	8	70608576	70663279
ENSG00000198542	ITGBL1	6.38019	6.66291	4.2839	6.52155	4.2839	-2.23765	0.0125951	0.16412	13	101452592	101720856
ENSG00000260352	CTD-2288F12.1	5.80387	5.24654	3.28593	5.5252	3.28593	-2.23928	0.0414779	0.345902	16	18926862	18937043
ENSG00000198780	FAM169A	7.54804	8.04278	5.54575	7.79541	5.54575	-2.24966	0.00188182	0.0410803	5	74777573	74866951
ENSG00000180537	RNF182	9.96766	10.3516	7.90847	10.1596	7.90847	-2.25116	2.53e-06	0.000145214	6	13924445	13980302
ENSG00000166920	C15orf48	13.8811	15.8732	12.6244	14.8772	12.6244	-2.25277	0.0010991	0.0271695	15	45430528	45448761
ENSG00000156970	BUB1B	9.33025	7.11159	5.96058	8.22092	5.96058	-2.26034	0.0160846	0.192646	15	40161022	40221136
ENSG00000261105	LMO7-AS1	8.50969	9.99641	6.98262	9.25305	6.98262	-2.27043	0.00250144	0.0505446	13	75604699	75635994
ENSG00000166265	CYYR1	6.65724	6.85613	4.48527	6.75669	4.48527	-2.27142	0.00779432	0.116543	21	26466208	26573284
ENSG00000251381	LINC00958	14.984	14.0495	12.2419	14.5167	12.2419	-2.27487	8.81e-06	0.000436643	11	12961841	12989548
ENSG00000184260	HIST2H2AC	9.68988	10.3876	7.75454	10.0387	7.75454	-2.28419	3.06e-05	0.0013285	1	149886974	149887364
ENSG00000254300	LINC01111	9.34771	10.0638	7.41961	9.70576	7.41961	-2.28615	6.35e-05	0.00249281	8	76406653	76524356
ENSG00000130592	LSP1	8.55924	8.91936	6.45225	8.7393	6.45225	-2.28705	0.000116842	0.00423408	11	1852969	1892267
ENSG00000158806	NPM2	9.28565	6.27738	5.48439	7.78151	5.48439	-2.29713	0.0295742	0.284035	8	22024124	22036897
ENSG00000203258	RP11-47J17.2	5.80387	5.63937	3.42306	5.72162	3.42306	-2.29855	0.0274965	0.270803	11	12921185	12922925
ENSG00000187098	MITF	13.3907	12.9799	10.8855	13.1853	10.8855	-2.29979	2.12e-08	2.13e-06	3	69739434	69968337
ENSG00000127252	HRASLS	10.1329	11.2561	8.39469	10.6945	8.39469	-2.29981	0.000163808	0.00570046	3	193241124	193277738
ENSG00000119630	PGF	9.61795	7.44242	6.22726	8.53018	6.22726	-2.30293	0.0114413	0.153417	14	74941833	74955784
ENSG00000157214	STEAP2	6.55573	7.48557	4.71633	7.02065	4.71633	-2.30431	0.010009	0.140509	7	90167589	90238137
ENSG00000139117	CPNE8	9.93048	9.63132	7.47586	9.7809	7.47586	-2.30504	3.12e-06	0.00017349	12	38646821	38907430
ENSG00000235947	EGOT	9.88786	11.2923	8.282	10.5901	8.282	-2.30807	0.000567313	0.0161266	3	4749191	4751590
ENSG00000266088	RP5-1028K7.2	7.47046	6.88864	4.86819	7.17955	4.86819	-2.31136	0.00511967	0.0847912	17	40517025	40527002
ENSG00000272501	XXbac-BPG299F13.17	7.08961	7.17885	4.81932	7.13423	4.81932	-2.31491	0.00337626	0.0633328	6	31195199	31198037
ENSG00000002587	HS3ST1	11.7081	10.1734	8.62538	10.9408	8.62538	-2.31539	0.000754123	0.0203173	4	11393149	11429765
ENSG00000135697	BCO1	6.67118	6.22742	4.13212	6.4493	4.13212	-2.31718	0.0124823	0.163135	16	81238447	81291142
ENSG00000138678	GPAT3	11.0829	9.22008	7.83048	10.1515	7.83048	-2.32101	0.00252294	0.0508618	4	83535913	83605875
ENSG00000205362	MT1A	10.8377	9.32774	7.76102	10.0827	7.76102	-2.32172	0.0011596	0.0283263	16	56638665	56750276
ENSG00000186205	2019-03-01	7.04749	5.34354	3.86954	6.19552	3.86954	-2.32598	0.0382322	0.329511	1	220786758	220819657
ENSG00000188064	WNT7B	12.9556	12.4579	10.3799	12.7067	10.3799	-2.32682	8.71e-08	7.6e-06	22	45920361	45977129
ENSG00000127399	LRRC61	10.6907	10.0903	8.06338	10.3905	8.06338	-2.3271	6.51e-06	0.000333857	7	150322638	150338150
ENSG00000273165	RP11-1057B6.1	5.05879	7.13887	3.7702	6.09883	3.7702	-2.32864	0.048317	0.376315	2	31852975	31853423
ENSG00000115844	DLX2	9.04732	7.87444	6.13043	8.46088	6.13043	-2.33045	0.00248489	0.0503633	2	172099438	172102900
ENSG00000170927	PKHD1	7.22804	6.14907	4.35419	6.68855	4.35419	-2.33436	0.0159559	0.191678	6	51615299	52087625
ENSG00000233954	UQCRHL	11.3308	11.5604	9.10722	11.4456	9.10722	-2.33836	4.82e-09	5.63e-07	1	15807168	15809348
ENSG00000237515	SHISA9	11.0894	12.0033	9.20794	11.5463	9.20794	-2.3384	1.54e-05	0.000711204	16	12901619	13240413
ENSG00000153292	ADGRF1	10.6726	10.3132	8.14991	10.4929	8.14991	-2.34302	4.13e-07	3e-05	6	46997702	47042363
ENSG00000230176	LINC01433	5.67147	6.34922	3.6635	6.01034	3.6635	-2.34684	0.0223836	0.237212	20	4193064	4195943
ENSG00000196312	MFSD14C	5.55604	9.23596	5.0486	7.396	5.0486	-2.3474	0.0410567	0.344152	9	96898065	97013580
ENSG00000251503	APITD1-CORT	6.65724	5.78464	3.86954	6.22094	3.86954	-2.3514	0.0205555	0.224206	1	10430101	10452153
ENSG00000145040	UCN2	8.15046	8.19352	5.81862	8.17199	5.81862	-2.35337	0.00023938	0.0078771	3	48561726	48563773
ENSG00000136531	SCN2A	6.05835	9.0034	5.17049	7.53088	5.17049	-2.36039	0.0298774	0.285569	2	165239401	165392310
ENSG00000170381	SEMA3E	9.1628	10.7809	7.6112	9.97184	7.6112	-2.36064	0.00132332	0.0313221	7	83363905	83649010
ENSG00000153283	CD96	7.24677	7.65578	5.09039	7.45127	5.09039	-2.36089	0.00201913	0.0434522	3	111292718	111665750
ENSG00000204792	LINC01291	7.29257	7.70224	5.131	7.4974	5.131	-2.36641	0.00180525	0.0399272	2	74918147	74938418
ENSG00000176463	SLCO3A1	9.49797	10.1248	7.44399	9.81137	7.44399	-2.36739	1.54e-05	0.000711204	15	91853694	92172435
ENSG00000035499	DEPDC1B	9.32364	5.67708	5.131	7.50036	5.131	-2.36937	0.0377516	0.326652	5	60596911	60700190
ENSG00000101311	FERMT1	10.8454	9.69933	7.90262	10.2724	7.90262	-2.36977	0.000207385	0.00698143	20	6074844	6123544
ENSG00000147592	LACTB2	11.617	13.4402	10.1572	12.5286	10.1572	-2.37144	0.000793228	0.0211435	8	70635317	70669174
ENSG00000260349	RP11-473I1.5	8.40933	11.4867	7.56748	9.94799	7.56748	-2.38051	0.00960587	0.136862	16	9105833	9107174
ENSG00000075891	PAX2	11.5474	12.5108	9.63595	12.0291	9.63595	-2.39314	1.09e-05	0.000519581	10	100735602	100829941
ENSG00000185332	TMEM105	6.25624	6.27738	3.86954	6.26681	3.86954	-2.39727	0.0109924	0.150387	17	81311269	81330674
ENSG00000088726	TMEM40	12.3092	11.1224	9.30873	11.7158	9.30873	-2.40708	6.8e-05	0.00262944	3	12733524	12769457
ENSG00000123485	HJURP	11.008	7.56817	6.87914	9.28809	6.87914	-2.40895	0.0146869	0.18282	2	233833415	233854566
ENSG00000224358	RP11-466F5.8	5.21917	4.70501	2.55166	4.96209	2.55166	-2.41043	0.0484352	0.376553	1	165768928	165775176
ENSG00000183850	ZNF730	6.64317	6.27738	4.04979	6.46027	4.04979	-2.41048	0.00907338	0.131194	19	23075209	23147219
ENSG00000177494	ZBED2	11.5535	12.2168	9.47373	11.8852	9.47373	-2.41143	4.36e-07	3.11e-05	3	111592899	111595443
ENSG00000272841	RP3-428L16.2	5.99328	7.25564	4.21001	6.62446	4.21001	-2.41445	0.0166319	0.196701	6	160990317	160992342
ENSG00000213780	GTF2H4	5.10059	4.84412	2.55166	4.97235	2.55166	-2.42069	0.0450001	0.361152	6	30908183	30914106
ENSG00000121621	KIF18A	9.47829	9.1943	6.91447	9.3363	6.91447	-2.42183	4.79e-06	0.000256701	11	28020619	28108308
ENSG00000151364	KCTD14	9.55921	7.46415	6.08981	8.51168	6.08981	-2.42187	0.00796739	0.118424	11	78015714	78046191
ENSG00000196081	ZNF724P	8.11011	8.32405	5.79355	8.21708	5.79355	-2.42353	0.000167813	0.00580527	19	23221598	23250390
ENSG00000132170	PPARG	9.78587	7.9457	6.43613	8.86578	6.43613	-2.42965	0.00415929	0.0736866	3	12287367	12434356
ENSG00000089127	OAS1	6.34585	5.0876	3.28593	5.71672	3.28593	-2.4308	0.0350838	0.312339	12	112906776	112933222
ENSG00000112742	TTK	7.12041	4.84412	3.54829	5.98226	3.54829	-2.43398	0.0478387	0.373738	6	80003886	80042527
ENSG00000139973	SYT16	7.94211	8.46546	5.76802	8.20379	5.76802	-2.43576	0.000355412	0.0109169	14	61995822	62112550
ENSG00000139675	HNRNPA1L2	10.9203	10.2936	8.15484	10.607	8.15484	-2.45211	1.81e-06	0.000107438	13	52640785	52643796
ENSG00000271857	RP1-244F24.1	8.11011	8.45464	5.81862	8.28238	5.81862	-2.46375	0.000148694	0.00524737	6	45421078	45422005
ENSG00000198028	ZNF560	4.55666	5.47781	2.55166	5.01724	2.55166	-2.46558	0.0482817	0.376315	19	9466506	9498607
ENSG00000236886	AC007563.5	7.67795	6.48299	4.60542	7.08047	4.60542	-2.47505	0.0084523	0.124367	2	216694463	216994079
ENSG00000238287	RP11-656D10.3	6.60011	6.27738	3.96248	6.43874	3.96248	-2.47627	0.00760892	0.114355	1	40493156	40508661
ENSG00000144481	TRPM8	6.60011	6.62482	4.13212	6.61247	4.13212	-2.48034	0.005017	0.0835643	2	233917397	234019522
ENSG00000272732	RP5-1159O4.2	7.29257	6.64399	4.48527	6.96828	4.48527	-2.48301	0.00447976	0.0779469	7	7550103	7552440
ENSG00000271167	LINC01109	6.25624	6.25261	3.7702	6.25443	3.7702	-2.48423	0.00890619	0.128989	8	76404057	76407138
ENSG00000238058	RP11-432J22.2	6.47857	4.77624	3.13437	5.62741	3.13437	-2.49303	0.0424842	0.349545	9	135907811	135913513
ENSG00000103460	TOX3	6.91321	7.39794	4.66194	7.15558	4.66194	-2.49363	0.00242416	0.0494963	16	52438004	52547802
ENSG00000139354	GAS2L3	9.55357	10.1568	7.36106	9.8552	7.36106	-2.49414	4.19e-06	0.000227304	12	100573682	100628286
ENSG00000198056	PRIM1	9.24895	6.66291	5.4527	7.95593	5.4527	-2.50323	0.0151793	0.186195	12	56731595	56752373
ENSG00000151882	CCL28	5.92513	7.67454	4.2839	6.79984	4.2839	-2.51594	0.0178855	0.206239	5	43376644	43412391
ENSG00000101307	SIRPB1	6.50993	7.2305	4.35419	6.87021	4.35419	-2.51602	0.00504106	0.0837265	20	1563520	1620061
ENSG00000233101	HOXB-AS3	11.8603	11.9108	9.36939	11.8856	9.36939	-2.51619	1.5e-11	2.53e-09	17	48549629	48606414
ENSG00000171320	ESCO2	8.70861	6.43976	5.0486	7.57419	5.0486	-2.52559	0.0149897	0.185014	8	27771948	27812640
ENSG00000145287	PLAC8	8.60352	5.43443	4.48527	7.01898	4.48527	-2.53371	0.0338491	0.305927	4	83090047	83137075
ENSG00000181577	C6orf223	5.39741	5.9478	3.13437	5.67261	3.13437	-2.53823	0.0200026	0.219954	6	44000579	44005958
ENSG00000121858	TNFSF10	12.2053	14.7533	10.9408	13.4793	10.9408	-2.53848	0.00172962	0.0386936	3	172505507	172523507
ENSG00000229178	AC069513.4	7.04749	6.46154	4.21001	6.75451	4.21001	-2.54451	0.00482739	0.0815679	3	195655564	195657927
ENSG00000124575	HIST1H1D	9.65699	6.5857	5.57548	8.12135	5.57548	-2.54586	0.0171264	0.200386	6	26234267	26234933
ENSG00000238198	RP11-31F15.2	5.61491	6.80595	3.6635	6.21043	3.6635	-2.54692	0.0175792	0.204242	1	113011686	113073105
ENSG00000275216	RP11-54H7.4	10.5231	9.24227	7.33523	9.8827	7.33523	-2.54748	0.000217676	0.00725046	13	109269633	109273838
ENSG00000169684	CHRNA5	7.18982	8.49743	5.28289	7.84363	5.28289	-2.56074	0.00308071	0.0589232	15	78565519	78595269
ENSG00000254333	CTC-367J11.1	10.3444	9.13795	7.17938	9.74119	7.17938	-2.5618	0.000174264	0.00598123	5	150475530	150485968
ENSG00000126778	SIX1	9.57782	10.1849	7.31774	9.88137	7.31774	-2.56363	2.26e-06	0.000129731	14	60643414	60658259
ENSG00000269910	RP11-73M18.10	5.67147	6.56574	3.54829	6.1186	3.54829	-2.57031	0.0142717	0.179951	14	103694515	103695050
ENSG00000258667	HIF1A-AS2	8.93918	10.5309	7.15989	9.73506	7.15989	-2.57517	0.000608605	0.0172166	14	61715557	61751097
ENSG00000164104	HMGB2	13.4187	11.1579	9.71153	12.2883	9.71153	-2.57675	0.00111117	0.0273335	4	173331694	173335125
ENSG00000130038	CRACR2A	7.38848	6.50412	4.35419	6.9463	4.35419	-2.59211	0.00468037	0.0799309	12	3606632	3764819
ENSG00000243414	TICAM2	5.18071	5.9478	2.96501	5.56426	2.96501	-2.59925	0.0224037	0.237282	5	115578649	115602479
ENSG00000116035	VAX2	8.67788	7.79949	5.63316	8.23868	5.63316	-2.60552	0.000502785	0.0146484	2	70900589	70933446
ENSG00000251555	RP11-745L13.2	4.55666	6.20177	2.77309	5.37921	2.77309	-2.60613	0.0417217	0.34658	4	131930030	131975952
ENSG00000197249	SERPINA1	11.0645	9.15809	7.49932	10.1113	7.49932	-2.612	0.000968008	0.0248215	14	94376746	94390693
ENSG00000175567	UCP2	11.9141	13.0544	9.86838	12.4842	9.86838	-2.61584	6.73e-06	0.000343008	11	73974666	73983307
ENSG00000135549	PKIB	14.0806	13.9117	11.3794	13.9961	11.3794	-2.61674	1.85e-13	4.12e-11	6	122471916	122726373
ENSG00000227039	ITGB2-AS1	8.14548	6.06623	4.48527	7.10585	4.48527	-2.62058	0.015181	0.186195	21	44921050	44929678
ENSG00000215386	MIR99AHG	8.89235	7.56817	5.60461	8.23026	5.60461	-2.62565	0.00161633	0.0368646	21	16070521	16627397
ENSG00000232949	AC002480.4	8.66401	8.80904	6.11026	8.73653	6.11026	-2.62626	6.09e-06	0.000315288	7	22589704	22591622
ENSG00000170561	IRX2	11.0836	9.62651	7.72831	10.355	7.72831	-2.62672	0.000187014	0.00636901	5	2745844	2751662
ENSG00000162620	LRRIQ3	8.47833	7.35205	5.28289	7.91519	5.28289	-2.6323	0.00155681	0.0358802	1	74026014	74198187
ENSG00000153157	SYCP2L	6.8036	6.88864	4.21001	6.84612	4.21001	-2.63611	0.00194089	0.0419744	6	10886830	10979320
ENSG00000223784	RP11-554I8.2	11.686	10.7133	8.55996	11.1996	8.55996	-2.63968	4.11e-06	0.000223984	10	6737381	6739026
ENSG00000100033	PRODH	5.69894	5.14255	2.77309	5.42074	2.77309	-2.64765	0.0215277	0.23065	22	18912776	18936553
ENSG00000165449	SLC16A9	5.05879	7.98382	3.86954	6.5213	3.86954	-2.65177	0.0351671	0.31246	10	59650760	59736002
ENSG00000231028	LINC00271	5.18071	4.70501	2.28997	4.94286	2.28997	-2.65289	0.0334385	0.30356	6	135497800	135716055
ENSG00000081665	ZNF506	10.5375	11.3856	8.30436	10.9616	8.30436	-2.65719	1.13e-06	7.23e-05	19	19785838	19821751
ENSG00000183067	IGSF5	6.73891	6.34922	3.86954	6.54407	3.86954	-2.67453	0.00382925	0.0693099	21	39745406	39802096
ENSG00000165983	PTER	8.80024	9.74665	6.58971	9.27345	6.58971	-2.68374	4.57e-05	0.00189551	10	16436942	16513745
ENSG00000258586	RP5-1021I20.2	10.6296	11.354	8.30436	10.9918	8.30436	-2.68741	2e-07	1.65e-05	14	73822558	73830135
ENSG00000106006	HOXA6	10.0094	10.092	7.36106	10.0507	7.36106	-2.68964	3.58e-09	4.24e-07	7	27145395	27150603
ENSG00000235852	AC005540.3	4.49531	5.47781	2.28997	4.98656	2.28997	-2.69659	0.0360877	0.317812	2	190880796	190882059
ENSG00000250551	RP11-254I22.1	5.05879	4.28405	1.97006	4.67142	1.97006	-2.70136	0.0430352	0.351474	5	96050114	96215519
ENSG00000237440	ZNF737	5.75235	8.21931	4.2839	6.98583	4.2839	-2.70193	0.0191749	0.214619	19	20535824	20565809
ENSG00000250159	RP11-381K20.2	8.14048	6.80595	4.76875	7.47321	4.76875	-2.70447	0.00346909	0.064797	5	137814332	137889336
ENSG00000253858	CTB-147C13.1	5.39741	5.9478	2.96501	5.67261	2.96501	-2.7076	0.0141881	0.179412	5	170483805	170486407
ENSG00000257642	RP11-474B16.1	6.69865	6.46154	3.86954	6.58009	3.86954	-2.71056	0.00285729	0.0557442	12	105304866	105327017
ENSG00000267740	AC024592.12	6.43022	7.99879	4.48527	7.2145	4.48527	-2.72923	0.00617089	0.0979312	19	5866170	5903787
ENSG00000102678	FGF9	7.33696	9.15809	5.5154	8.24752	5.5154	-2.73213	0.00292013	0.0565924	13	21671382	21704498
ENSG00000173083	HPSE	8.23264	4.97099	3.86954	6.60182	3.86954	-2.73228	0.0351357	0.312339	4	83292460	83335153
ENSG00000138472	GUCA1C	7.58531	8.53386	5.31849	8.05959	5.31849	-2.7411	0.000457512	0.0135581	3	108907791	108953895
ENSG00000117707	PROX1	5.8536	5.91661	3.13437	5.88511	3.13437	-2.75073	0.00804925	0.119438	1	213983180	214041502
ENSG00000224621	RP11-276H7.3	5.18071	5.43443	2.55166	5.30757	2.55166	-2.75591	0.0179541	0.20648	1	16159265	16161883
ENSG00000250305	KIAA1456	6.36312	5.0876	2.96501	5.72536	2.96501	-2.76035	0.0201078	0.220789	8	12945641	13031503
ENSG00000185201	IFITM2	12.9492	12.6405	10.0301	12.7948	10.0301	-2.76473	2.48e-12	4.78e-10	11	307630	315272
ENSG00000182132	KCNIP1	8.27433	9.48484	6.11026	8.87958	6.11026	-2.76932	0.000214035	0.0071504	5	170353486	170736632
ENSG00000170523	KRT83	5.52568	3.95619	1.97006	4.74093	1.97006	-2.77087	0.0494853	0.380668	12	52314300	52321398
ENSG00000264443	RP4-594I10.3	8.34558	7.54796	5.17049	7.94677	5.17049	-2.77628	0.000334368	0.010398	1	24538801	24556024
ENSG00000205571	SMN2	7.79076	8.10636	5.17049	7.94856	5.17049	-2.77807	6.96e-05	0.00264393	5	70049611	70078522
ENSG00000243410	RP11-245J9.4	5.10059	5.56085	2.55166	5.33072	2.55166	-2.77906	0.0178503	0.206239	3	64011963	64016246
ENSG00000278932	bP-21264C1.2	4.49531	7.67454	3.28593	6.08493	3.28593	-2.799	0.0425183	0.34961	21	9325012	9368775
ENSG00000111331	OAS3	9.31701	8.79195	6.24587	9.05448	6.24587	-2.80862	3.07e-06	0.000171291	12	112938351	112973249
ENSG00000163053	SLC16A14	5.77834	5.3897	2.77309	5.58402	2.77309	-2.81093	0.0119941	0.158169	2	230034973	230068999
ENSG00000243550	LINC01214	4.55666	4.18282	1.55838	4.36974	1.55838	-2.81136	0.043902	0.356315	3	150265411	150287373
ENSG00000204880	KRTAP4-8	6.47857	5.43443	3.13437	5.9565	3.13437	-2.82213	0.0117107	0.155543	17	41096980	41098141
ENSG00000106013	ANKRD7	8.06332	7.42035	4.91545	7.74183	4.91545	-2.82639	0.000268617	0.00875702	7	118214668	118496171
ENSG00000255245	FXYD6-FXYD2	5.80387	6.70002	3.42306	6.25194	3.42306	-2.82888	0.00673461	0.104529	11	117820162	117876667
ENSG00000267011	CTB-50L17.16	4.05967	5.60064	1.97006	4.83016	1.97006	-2.8601	0.0418981	0.347283	19	4457961	4471493
ENSG00000261141	RP11-303E16.5	4.82946	7.75609	3.42306	6.29278	3.42306	-2.86972	0.031532	0.294014	16	81055300	81056426
ENSG00000152078	TMEM56	10.9319	10.3747	7.7803	10.6533	7.7803	-2.87303	9.6e-09	1.06e-06	1	95117337	95197607
ENSG00000228049	POLR2J2	9.71027	8.72602	6.33547	9.21814	6.33547	-2.88267	2.3e-05	0.00102234	7	102665367	102671629
ENSG00000151892	GFRA1	14.1755	14.5251	11.4623	14.3503	11.4623	-2.888	1.51e-14	3.88e-12	10	116056924	116273467
ENSG00000160229	ZNF66	4.87834	6.03752	2.55166	5.45793	2.55166	-2.90627	0.0187069	0.211924	19	20776303	20807322
ENSG00000223791	UBE2E1-AS1	4.87834	4.07395	1.55838	4.47614	1.55838	-2.91776	0.0387362	0.331402	3	23804023	23806905
ENSG00000047457	CP	5.01575	9.2579	4.21001	7.13683	4.21001	-2.92682	0.032548	0.298965	3	149162409	149222055
ENSG00000128918	ALDH1A2	9.32364	5.74967	4.60542	7.53666	4.60542	-2.93123	0.019118	0.214408	15	57953423	58497866
ENSG00000226026	RP11-57H12.3	4.43124	4.55103	1.55838	4.49114	1.55838	-2.93276	0.0326416	0.299021	1	95163218	95233982
ENSG00000267470	ZNF571-AS1	6.99305	5.97833	3.54829	6.48569	3.54829	-2.9374	0.00439297	0.0768944	19	37548913	37587348
ENSG00000140368	PSTPIP1	4.6155	4.37864	1.55838	4.49707	1.55838	-2.93869	0.0325685	0.298965	15	76993358	77037332
ENSG00000185697	MYBL1	10.1417	11.9958	8.12499	11.0687	8.12499	-2.94375	0.000100789	0.00370594	8	66562174	66614247
ENSG00000186051	TAL2	6.27461	6.71823	3.54829	6.49642	3.54829	-2.94813	0.0019404	0.0419744	9	105662456	105663112
ENSG00000237807	RP11-400K9.4	6.60011	6.14907	3.42306	6.37459	3.42306	-2.95153	0.00253753	0.0509219	8	53515170	53523931
ENSG00000237505	PKN2-AS1	6.44652	6.03752	3.28593	6.24202	3.28593	-2.95609	0.00309298	0.0590443	1	88537512	88685204
ENSG00000160255	ITGB2	8.93051	4.90895	3.96248	6.91973	3.96248	-2.95725	0.0326877	0.299092	21	44885952	44931989
ENSG00000113946	CLDN16	10.8796	8.86729	6.91447	9.87345	6.91447	-2.95899	0.000412121	0.0124196	3	190322540	190412143
ENSG00000183668	PSG9	8.42997	8.07139	5.28289	8.25068	5.28289	-2.96779	1.01e-05	0.000487528	19	43211790	43269530
ENSG00000167653	PSCA	9.39676	6.88864	5.17049	8.1427	5.17049	-2.97221	0.00486925	0.0818025	8	142670307	142682724
ENSG00000278023	RDM1	6.98191	5.24654	3.13437	6.11423	3.13437	-2.97985	0.0140704	0.178438	17	35918065	35930773
ENSG00000271200	RP11-430G17.3	7.03676	6.25261	3.6635	6.64469	3.6635	-2.98119	0.00215125	0.0455732	1	61741997	61742424
ENSG00000168298	HIST1H1E	9.67439	9.58247	6.64684	9.62843	6.64684	-2.98159	1.59e-09	2.03e-07	6	26156353	26157107
ENSG00000062038	CDH3	5.01575	4.07395	1.55838	4.54485	1.55838	-2.98647	0.0352084	0.312669	16	68636188	68722616
ENSG00000222000	AC092675.3	5.36348	5.19548	2.28997	5.27948	2.28997	-2.98951	0.0119867	0.158169	2	98331388	98356005
ENSG00000184305	CCSER1	4.21995	6.3952	2.28997	5.30758	2.28997	-3.0176	0.0346288	0.309717	4	90127534	91601913
ENSG00000267939	CTD-2325M2.1	8.36715	9.35998	5.84327	8.86356	5.84327	-3.02029	2.27e-05	0.00101212	19	8008728	8016025
ENSG00000069482	GAL	8.9535	8.07845	5.48439	8.51598	5.48439	-3.03159	3.35e-05	0.00142869	11	68683778	68691175
ENSG00000235139	AC003984.1	4.6155	7.72042	3.13437	6.16796	3.13437	-3.03359	0.0314851	0.293889	7	84532475	84584322
ENSG00000213967	ZNF726	6.60011	6.3952	3.42306	6.49766	3.42306	-3.07459	0.00110318	0.0271752	19	23914875	23945159
ENSG00000281186	LINC00706	5.32873	3.95619	1.55838	4.64246	1.55838	-3.08408	0.0347882	0.310667	10	6774306	6779180
ENSG00000101049	SGK2	9.18725	4.90895	3.96248	7.0481	3.96248	-3.08562	0.0308615	0.291011	20	43558967	43588237
ENSG00000135378	PRRG4	8.7486	7.26805	4.91545	8.00832	4.91545	-3.09287	0.000661866	0.0182811	11	32829942	32858123
ENSG00000147804	SLC39A4	13.5781	12.1885	9.75927	12.8833	9.75927	-3.12404	1.3e-06	8e-05	8	144409741	144416895
ENSG00000108984	MAP2K6	6.91321	4.90895	2.77309	5.91108	2.77309	-3.13799	0.0167404	0.197451	17	69414697	69543331
ENSG00000108622	ICAM2	10.3159	7.97627	6.00495	9.14608	6.00495	-3.14112	0.000941593	0.0242862	17	64002593	64020634
ENSG00000169583	CLIC3	11.0965	12.006	8.40714	11.5513	8.40714	-3.14414	9.65e-09	1.06e-06	9	136994634	136996803
ENSG00000114805	PLCH1	5.94821	5.47781	2.55166	5.71301	2.55166	-3.16135	0.00505524	0.0838826	3	155375579	155745067
ENSG00000256292	RP11-955H22.1	4.49531	5.78464	1.97006	5.13998	1.97006	-3.16991	0.0191336	0.214408	12	127274466	127284283
ENSG00000203995	ZYG11A	5.64346	3.82795	1.55838	4.73571	1.55838	-3.17732	0.0360765	0.317812	1	52842510	52894998
ENSG00000072080	SPP2	5.39741	4.90895	1.97006	5.15318	1.97006	-3.18312	0.0113303	0.152836	2	234050678	234077134
ENSG00000089012	SIRPG	5.10059	5.24654	1.97006	5.17357	1.97006	-3.2035	0.00948215	0.135685	20	1629151	1657779
ENSG00000130675	MNX1	8.18972	7.75609	4.76875	7.97291	4.76875	-3.20416	1.03e-05	0.000492882	7	156994050	157010651
ENSG00000260963	RP11-297L17.2	4.43124	3.95619	0.98011	4.19371	0.98011	-3.2136	0.03289	0.30029	16	52607348	52613908
ENSG00000262020	RP11-66H6.3	5.67147	8.85911	4.04979	7.26529	4.04979	-3.2155	0.0128342	0.16637	16	11066495	11071102
ENSG00000232774	FLJ22447	13.9017	12.2003	9.83497	13.051	9.83497	-3.21599	6.07e-06	0.000314927	14	61570539	61658696
ENSG00000267308	AC004510.3	7.85322	5.43443	3.42306	6.64383	3.42306	-3.22076	0.0111377	0.151515	19	15827044	15835853
ENSG00000235277	AF127577.8	3.4326	4.97099	0.98011	4.20179	0.98011	-3.22168	0.0456059	0.364181	21	14918533	14947096
ENSG00000165300	SLITRK5	5.67147	5.88473	2.55166	5.7781	2.55166	-3.22644	0.00335519	0.0631342	13	87672614	87696272
ENSG00000169085	C8orf46	8.55924	9.22008	5.66116	8.88966	5.66116	-3.2285	6.32e-07	4.25e-05	8	66460002	66518524
ENSG00000139055	ERP27	4.6155	5.78464	1.97006	5.20007	1.97006	-3.23001	0.0151613	0.186195	12	14914034	14939082
ENSG00000144354	CDCA7	10.4009	6.95154	5.4203	8.67623	5.4203	-3.25594	0.00525859	0.0865746	2	173354819	173368997
ENSG00000274997	HIST1H2AH	6.29275	5.34354	2.55166	5.81815	2.55166	-3.26649	0.00540372	0.0884104	6	27147128	27147515
ENSG00000196878	LAMB3	12.0881	11.5058	8.5261	11.7969	8.5261	-3.27083	4.39e-12	7.86e-10	1	209614869	209652466
ENSG00000248373	RP11-556I14.1	5.32873	5.19548	1.97006	5.26211	1.97006	-3.29205	0.00711327	0.108865	4	104907356	105120000
ENSG00000256950	RP11-87C12.2	7.35434	8.12012	4.42122	7.73723	4.42122	-3.31601	4.33e-05	0.00180194	12	121888808	121921470
ENSG00000257126	FOXG1-AS1	6.64317	3.95619	1.97006	5.29968	1.97006	-3.32962	0.0339179	0.306326	14	28729082	28765277
ENSG00000235335	AC016723.4	6.12062	7.12529	3.28593	6.62296	3.28593	-3.33703	0.00119799	0.0290215	2	167814773	167941144
ENSG00000204941	PSG5	10.7103	10.992	7.50705	10.8511	7.50705	-3.34406	1.99e-14	4.92e-12	19	43166255	43186536
ENSG00000153404	PLEKHG4B	7.29257	8.32998	4.42122	7.81127	4.42122	-3.39005	7.36e-05	0.00277148	5	140257	189970
ENSG00000249209	AP000304.12	4.97138	5.78464	1.97006	5.37801	1.97006	-3.40795	0.00690472	0.106323	21	33584686	33931607
ENSG00000163735	CXCL5	10.1896	12.903	8.11996	11.5463	8.11996	-3.42634	0.000194928	0.00661284	4	73995641	73998779
ENSG00000135298	ADGRB3	7.5252	8.04278	4.35419	7.78399	4.35419	-3.4298	8.17e-06	0.00040841	6	68635366	69389511
ENSG00000166415	WDR72	5.01575	4.97099	1.55838	4.99337	1.55838	-3.43499	0.00849659	0.124456	15	53513740	53762878
ENSG00000095303	PTGS1	9.33682	9.82853	6.08981	9.58267	6.08981	-3.49287	3.19e-10	4.4e-08	9	122370529	122395703
ENSG00000156218	ADAMTSL3	8.66749	6.30173	3.96248	7.48461	3.96248	-3.52213	0.00269281	0.0530261	15	83654085	84039842
ENSG00000139220	PPFIA2	5.18071	3.82795	0.98011	4.50433	0.98011	-3.52422	0.0247794	0.252981	12	81257974	81759553
ENSG00000125726	CD70	14.2328	12.177	9.67767	13.2049	9.67767	-3.52722	7.7e-06	0.00038794	19	6583182	6604103
ENSG00000231638	AC011738.4	5.97092	7.0265	2.96501	6.49871	2.96501	-3.5337	0.00102742	0.0258906	7	43508727	43522542
ENSG00000236452	AC123023.1	5.77834	8.40494	3.54829	7.09164	3.54829	-3.54335	0.00562544	0.0908514	3	34203243	34268811
ENSG00000134962	KLB	3.5579	3.5312	0	3.54455	0	-3.54455	0.0443356	0.358012	4	39406852	39451536
ENSG00000237232	ZNF295-AS1	6.25624	4.77624	1.97006	5.51624	1.97006	-3.54618	0.00885169	0.128518	21	42009193	42024924
ENSG00000258636	CTD-2298J14.2	5.55604	6.64399	2.55166	6.10002	2.55166	-3.54836	0.00226069	0.0472026	14	41587860	41604856
ENSG00000258808	RP11-255G12.3	5.90168	5.78464	2.28997	5.84316	2.28997	-3.55319	0.00138093	0.0324667	14	51392127	51397135
ENSG00000250337	LINC01021	10.0842	8.19352	5.57548	9.13887	5.57548	-3.56339	6.88e-05	0.00262944	5	27472291	27496401
ENSG00000235142	RP1-60O19.1	6.16069	5.56085	2.28997	5.86077	2.28997	-3.5708	0.0018289	0.0402979	6	106717451	106787541
ENSG00000186493	C5orf38	8.14548	9.91984	5.4527	9.03266	5.4527	-3.57996	4.48e-05	0.00186034	5	2752130	2755397
ENSG00000224982	TMEM233	9.5962	9.74887	6.08981	9.67253	6.08981	-3.58273	1.01e-12	2.01e-10	12	119593458	119643066
ENSG00000242265	PEG10	16.0977	14.022	11.4583	15.0599	11.4583	-3.60156	1.78e-06	0.000106098	7	94656324	94669695
ENSG00000133116	KL	3.5579	5.63937	0.98011	4.59863	0.98011	-3.61852	0.0321259	0.296556	13	33016432	33066145
ENSG00000282851	BISPR	4.92561	6.25261	1.97006	5.58911	1.97006	-3.61905	0.00616313	0.0979312	19	17405693	17418904
ENSG00000137959	IFI44L	7.80979	6.03752	3.28593	6.92365	3.28593	-3.63773	0.00162423	0.0369966	1	78619921	78646145
ENSG00000188000	OR7D2	5.01575	6.20177	1.97006	5.60876	1.97006	-3.6387	0.00492618	0.082443	19	9185593	9188817
ENSG00000278677	HIST1H2AM	4.43124	4.84412	0.98011	4.63768	0.98011	-3.65757	0.0114414	0.153417	6	27892756	27893149
ENSG00000227695	DNMBP-AS1	7.82856	7.91446	4.13212	7.87151	4.13212	-3.73939	2.77e-07	2.17e-05	10	99927009	99958381
ENSG00000232445	RP11-132A1.4	8.12537	5.34354	2.96501	6.73446	2.96501	-3.76945	0.00739518	0.112298	7	101308345	101310985
ENSG00000175287	PHYHD1	9.89381	9.22327	5.74204	9.55854	5.74204	-3.8165	2.88e-10	4e-08	9	128920894	128942041
ENSG00000272205	RP11-277B15.3	4.49531	3.15717	0	3.82624	0	-3.82624	0.0387348	0.331402	1	167219830	167220512
ENSG00000164430	MB21D1	9.13792	7.87444	4.66194	8.50618	4.66194	-3.84424	4.77e-06	0.000256634	6	73413514	73452276
ENSG00000227619	RP11-492E3.2	8.27889	8.12012	4.35419	8.1995	4.35419	-3.84531	2.19e-08	2.19e-06	9	129575408	129584556
ENSG00000281333	RP11-900F13.3	3.67319	4.07395	0	3.87357	0	-3.87357	0.0263275	0.262661	12	88580530	88598218
ENSG00000144355	DLX1	9.59254	8.29402	5.0486	8.94328	5.0486	-3.89468	1.19e-06	7.53e-05	2	172084739	172089677
ENSG00000176681	LRRC37A	5.52568	5.3897	1.55838	5.45769	1.55838	-3.89931	0.00167876	0.0377806	17	46292732	46337794
ENSG00000243479	MNX1-AS1	8.19937	5.56085	2.96501	6.88011	2.96501	-3.9151	0.00447363	0.0779175	7	157010804	157016426
ENSG00000124610	HIST1H1A	10.1836	8.83429	5.57548	9.50894	5.57548	-3.93346	2.63e-07	2.09e-05	6	26017084	26017732
ENSG00000113763	UNC5A	4.29387	3.68719	0	3.99053	0	-3.99053	0.0224715	0.237714	5	176810476	176880895
ENSG00000151632	AKR1C2	9.54603	6.85613	4.21001	8.20108	4.21001	-3.99107	0.000825907	0.0217828	10	4922563	5135226
ENSG00000226472	RP11-551L14.4	5.01575	4.97099	0.98011	4.99337	0.98011	-4.01326	0.00370445	0.0674688	12	30978307	31006010
ENSG00000235659	RP11-374M1.5	7.50199	4.46741	1.97006	5.9847	1.97006	-4.01464	0.0154302	0.187612	9	61865754	61866965
ENSG00000148488	ST8SIA6	3.97232	4.07395	0	4.02313	0	-4.02313	0.0190383	0.213909	10	17318382	17454330
ENSG00000154133	ROBO4	6.90143	6.25261	2.55166	6.57702	2.55166	-4.02536	0.00010284	0.00377345	11	124883690	124898500
ENSG00000156869	FRRS1	4.36419	5.67708	0.98011	5.02064	0.98011	-4.04053	0.00783176	0.116789	1	99708702	99766631
ENSG00000077420	APBB1IP	9.77784	10.7291	6.16994	10.2535	6.16994	-4.08352	4.41e-11	6.9e-09	10	26438202	26567803
ENSG00000235029	MNX1-AS2	4.6155	3.68719	0	4.15135	0	-4.15135	0.0186469	0.211544	7	157006306	157007132
ENSG00000170442	KRT86	8.86836	6.78882	3.6635	7.82859	3.6635	-4.16509	0.000229519	0.00758105	12	52249299	52309163
ENSG00000276500	BMS1P14	4.14203	8.87948	2.28997	6.51076	2.28997	-4.22078	0.0310043	0.291434	9	40505398	40566281
ENSG00000249378	LINC01060	7.40525	7.3866	3.13437	7.39593	3.13437	-4.26155	3.09e-07	2.38e-05	4	188400735	188681051
ENSG00000163762	TM4SF18	7.34567	7.53775	3.13437	7.44171	3.13437	-4.30733	2.23e-07	1.81e-05	3	149318497	149334414
ENSG00000022556	NLRP2	9.69671	8.89556	4.96121	9.29613	4.96121	-4.33492	9.15e-11	1.38e-08	19	54953129	55001142
ENSG00000136155	SCEL	6.7122	3.95619	0.98011	5.33419	0.98011	-4.35408	0.017584	0.204242	13	77535673	77645263
ENSG00000259359	RP11-327J17.2	4.87834	3.95619	0	4.41726	0	-4.41726	0.0107313	0.147969	15	96171580	96174339
ENSG00000172716	SLFN11	5.75235	5.0876	0.98011	5.41998	0.98011	-4.43987	0.00116214	0.0283488	17	35350304	35373701
ENSG00000236130	PTCSC2	3.29536	5.63937	0	4.46737	0	-4.46737	0.0283288	0.275727	9	97805934	97810008
ENSG00000257184	HOXA10-HOXA9	3.5579	5.63937	0	4.59863	0	-4.59863	0.0192111	0.21475	7	27163534	27180013
ENSG00000164120	HPGD	9.09204	10.7547	5.20894	9.92335	5.20894	-4.71441	1.1e-08	1.19e-06	4	174490176	174523154
ENSG00000070031	SCT	4.82946	4.84412	0	4.83679	0	-4.83679	0.00227628	0.047359	11	626430	627143
ENSG00000249746	RP11-254I22.3	8.58524	11.1318	5.00557	9.85851	5.00557	-4.85295	4.53e-06	0.000245216	5	96213345	96215075
ENSG00000225526	MKRN2OS	4.43124	5.29586	0	4.86355	0	-4.86355	0.00331246	0.0624701	3	12514933	12561059
ENSG00000111058	ACSS3	4.72644	5.24654	0	4.98649	0	-4.98649	0.00168019	0.0377806	12	80936413	81261205
ENSG00000007372	PAX6	7.58531	9.06515	3.28593	8.32523	3.28593	-5.03931	1.92e-07	1.59e-05	11	31784791	31817961
ENSG00000234828	RP11-526A4.1	4.05967	6.20177	0	5.13072	0	-5.13072	0.00861389	0.125585	4	149352016	149896233
ENSG00000163737	PF4	6.39706	4.63007	0	5.51357	0	-5.51357	0.00224006	0.0468835	4	73981076	73982124
ENSG00000152192	POU4F1	6.0153	9.67391	2.28997	7.8446	2.28997	-5.55463	0.00185064	0.0407258	13	78598361	78603560
ENSG00000249550	LINC01234	4.05967	7.30465	0	5.68216	0	-5.68216	0.014413	0.180951	12	113679458	113773683
ENSG00000123689	G0S2	13.5146	13.3116	7.48373	13.4131	7.48373	-5.92939	2.55e-54	8.95e-51	1	209675419	209676388
ENSG00000205426	KRT81	12.7132	9.81167	4.42122	11.2624	4.42122	-6.84121	9.96e-08	8.61e-06	12	52285912	52291534
ENSG00000234665	RP11-262H14.3	10.8175	10.0094	3.54829	10.4135	3.54829	-6.86518	1.41e-25	8.55e-23	9	62856998	62898087
ENSG00000267368	UPK3BL	6.7909	7.70224	0	7.24657	0	-7.24657	8.91e-09	9.89e-07	7	102637024	102642791

## Sheet: Supplemental_Table_S5
ID	Description	GeneRatio	BgRatio	pvalue	p.adjust	qvalue	geneID	Count
GO:0030198	extracellular matrix organization	74/780	348/18493	1.17e-31	1.17e-31	4.54e-28	POSTN/COL3A1/ADAMTS2/COL1A2/SULF1/ABI3BP/WT1/A2M/FAP/COL5A3/FOXF1/HAPLN1/DDR2/AEBP1/VTN/ITGA8/NID2/COL6A3/PDGFRA/KDR/ADAMTS4/EMILIN1/LOXL3/ADAMTS14/FBLN2/VCAM1/PTX3/JAM2/MFAP5/HAS2/COL5A1/FBLN5/SERPINE1/ITGA2/CCDC80/ITGA4/MMP7/DCN/SH3PXD2A/HTRA1/ICAM4/MFAP2/ITGA1/GREM1/COL6A1/COL16A1/COL1A1/MMP19/LOX/MMP15/FBLN1/COL25A1/SPOCK2/ADAM19/SERPINH1/CREB3L1/DPP4/CTGF/ITGB5/COL6A2/ITGA5/MMP14/PLOD1/COLGA…	74
GO:0043062	extracellular structure organization	77/780	402/18493	1.08e-29	1.08e-29	2.08e-26	POSTN/COL3A1/ADAMTS2/COL1A2/SULF1/ABI3BP/WT1/A2M/FAP/AGTR1/COL5A3/FOXF1/APOA1/HAPLN1/DDR2/AEBP1/VTN/ITGA8/NID2/COL6A3/PDGFRA/KDR/ADAMTS4/EMILIN1/LOXL3/ADAMTS14/FBLN2/VCAM1/PTX3/BMP7/JAM2/MFAP5/HAS2/COL5A1/FBLN5/SERPINE1/ITGA2/CCDC80/ITGA4/MMP7/DCN/SH3PXD2A/HTRA1/ICAM4/MFAP2/ITGA1/GREM1/COL6A1/COL16A1/COL1A1/MMP19/LOX/MMP15/FBLN1/COL25A1/SPOCK2/ADAM19/SERPINH1/CREB3L1/DPP4/CTGF/ITGB5/COL6A2/ITGA5/…	77
GO:0031589	cell-substrate adhesion	47/780	338/18493	5.49e-13	5.49e-13	7.08e-10	POSTN/COL3A1/ABI3BP/COL5A3/FOXF1/APOA1/VTN/TEK/ITGA8/THY1/NID2/KDR/EMILIN1/FBLN2/VCAM1/ANGPT1/HAS2/PTK2B/FBLN5/SERPINE1/ITGA2/CCDC80/ITGA4/SORBS1/FZD4/BST1/ITGA1/GREM1/COL16A1/COL1A1/FBLN1/SPOCK2/BCL6/CTGF/ITGB5/ITGA5/MMP14/ANTXR1/PKD1/AKIP1/RELL2/DDR1/PPARD/SLC9A1/DAG1/ROCK1/SPOCK1	47
GO:0061448	connective tissue development	37/780	263/18493	1.2e-10	1.2e-10	1.16e-07	HAND2/SULF1/WT1/GDF6/EFEMP1/PRRX1/ROR2/COL6A3/PITX1/MGP/BMP6/ACTA2/FGF18/SCARA3/BMP7/COL5A1/EGR1/OSR1/FRZB/PKDCC/GREM1/RARB/COL6A1/RARG/COL1A1/MAF/FOXD1/SERPINH1/SERPINB7/CTGF/COL6A2/ANXA6/PKD1/MEF2D/PPARD/DYRK1B/FGF2	37
GO:0030199	collagen fibril organization	16/780	52/18493	2.15e-10	2.15e-10	1.66e-07	COL3A1/ADAMTS2/COL1A2/COL5A3/DDR2/AEBP1/EMILIN1/LOXL3/ADAMTS14/COL5A1/GREM1/COL1A1/LOX/SERPINH1/PLOD1/COLGALT1	16
GO:0032963	collagen metabolic process	21/780	106/18493	2.76e-09	2.76e-09	1.78e-06	ADAMTS2/FAP/EMILIN1/ADAMTS14/COL5A1/ITGA2/MMP7/LARP6/COL1A1/MMP19/MMP15/SERPINH1/CREB3L1/SERPINB7/CTGF/MMP14/PLOD1/CTSB/MRC2/PPARD/CTSD	21
GO:0010810	regulation of cell-substrate adhesion	30/780	209/18493	4.27e-09	4.27e-09	2.36e-06	POSTN/ABI3BP/FOXF1/APOA1/VTN/TEK/THY1/KDR/EMILIN1/FBLN2/HAS2/PTK2B/SERPINE1/CCDC80/FZD4/BST1/GREM1/COL16A1/COL1A1/FBLN1/SPOCK2/BCL6/ITGA5/MMP14/RELL2/DDR1/SLC9A1/DAG1/ROCK1/SPOCK1	30
GO:0072012	glomerulus vasculature development	10/780	22/18493	6.86e-09	6.86e-09	3.32e-06	WT1/TEK/PDGFRA/ACTA2/NOTCH3/ANGPT1/BMP7/EGR1/OSR1/SERPINB7	10
GO:0018212	peptidyl-tyrosine modification	43/780	390/18493	8.9e-09	8.9e-09	3.82e-06	FLT1/KIT/CCL5/EFEMP1/DDR2/ROR2/VTN/TEK/THY1/PDGFRA/CNTN1/EPHB6/KDR/FGF18/ANGPT1/CSPG4/NTRK3/FGF7/TNFRSF14/PTK2B/GHR/DOK7/NTRK2/EGF/PKDCC/BST1/GREM1/INSR/FYN/ITGA5/GPRC5B/DLG4/ERCC6/MAP2K3/ICAM1/TPST1/DDR1/PPP2R5B/BCR/DYRK1B/FGF2/SH3BP5L/ARHGEF2	43
GO:0090287	regulation of cellular response to growth factor stimulus	35/780	282/18493	1.1e-08	1.1e-08	3.87e-06	FLT1/SULF1/IL1B/MYOCD/BMPER/VTN/ITGA8/CRB2/TMEM204/EMILIN1/LDLRAD4/FGF18/ADGRA2/HHIP/CHRD/NRROS/SLIT2/DCN/FZD4/TGFBR3/HTRA1/GREM1/ZNF703/DOK5/FOXD1/CREB3L1/ITGA5/SNX25/FSTL3/GPC1/LTBP1/PPP2R5B/FGF2/DKK3/TWSG1	35
GO:0051216	cartilage development	29/780	206/18493	1.21e-08	1.21e-08	3.87e-06	HAND2/SULF1/GDF6/EFEMP1/PRRX1/ROR2/COL6A3/PITX1/MGP/BMP6/FGF18/SCARA3/BMP7/OSR1/FRZB/PKDCC/GREM1/RARB/COL6A1/RARG/COL1A1/MAF/SERPINH1/CTGF/COL6A2/ANXA6/PKD1/MEF2D/FGF2	29
GO:0060541	respiratory system development	28/780	194/18493	1.24e-08	1.24e-08	3.87e-06	ADAMTS2/WT1/FOXF1/MYOCD/PDGFRA/ZFPM2/LOXL3/FGF18/HHIP/FGF7/MSC/KLF2/PKDCC/ALDH1A3/HEG1/ASS1/RARG/LOX/GATA6/RAB3A/CTGF/SHH/HS6ST1/MMP14/FSTL3/SPARC/PKD1/DAG1	28
GO:0016049	cell growth	49/780	485/18493	1.45e-08	1.45e-08	3.87e-06	POSTN/BDKRB1/WT1/CD38/RGS4/AGTR1/MYOCD/CXCL12/CACNG7/NRG3/ESM1/RIMS1/RASGRP2/SEMA3D/UNC13A/PLXNA4/NTRK3/PAPPA2/PTK2B/FBLN5/SEMA5A/ITGA4/NRCAM/NPPB/SLIT2/FRZB/SOX17/GNG4/HTRA1/GREM1/RARG/CRYAB/SGK1/FOXL2/SLIT3/BCL6/CTGF/SYT1/MMP14/APBB1/CTDP1/MEG3/DDR1/NDUFA13/PPARD/SLC9A1/TRIM46/SPOCK1/PLXNA1	49
GO:0003012	muscle system process	47/780	456/18493	1.54e-08	1.54e-08	3.87e-06	HAND2/PRKG1/SULF1/IL1B/KIT/CD38/RGS4/MYOCD/ACTG2/TMOD1/HEY2/PDE9A/DRD1/ACTA2/KCNE4/CHRM3/PLN/LMOD1/SYNM/MYL9/ITGA2/KCNJ12/SORBS1/BDKRB2/CHRNA1/NR4A3/MYH14/CAMK2B/ITGA1/CRYAB/HTR1D/GATA6/VEGFB/CTGF/ITGB5/TNNT1/SNTA1/GDNF/ANXA6/TPM2/ATP2B4/CTDP1/MAP2K3/GAA/SLC9A1/EHD3/ROCK1	47
GO:0072001	renal system development	35/780	286/18493	1.59e-08	1.59e-08	3.87e-06	SULF1/WT1/AGTR1/FOXF1/MYOCD/BMPER/TEK/ITGA8/PDGFRA/HOXC11/BMP6/ACTA2/NOTCH3/ANGPT1/BMP7/MMP17/HAS2/EGR1/OSR1/SLIT2/DCN/SOX17/GREM1/RARB/ASS1/KIF26B/NFIA/FOXD1/SERPINB7/SHH/GDNF/FSTL3/PKD1/FGF2/LZTS2	35
GO:0007160	cell-matrix adhesion	30/780	222/18493	1.77e-08	1.77e-08	3.87e-06	POSTN/COL3A1/COL5A3/VTN/TEK/ITGA8/THY1/NID2/KDR/EMILIN1/VCAM1/PTK2B/FBLN5/SERPINE1/ITGA2/ITGA4/SORBS1/BST1/ITGA1/GREM1/COL16A1/BCL6/CTGF/ITGB5/MMP14/PKD1/DDR1/SLC9A1/DAG1/ROCK1	30
GO:0061437	renal system vasculature development	10/780	24/18493	1.93e-08	1.93e-08	3.87e-06	WT1/TEK/PDGFRA/ACTA2/NOTCH3/ANGPT1/BMP7/EGR1/OSR1/SERPINB7	10
GO:0061440	kidney vasculature development	10/780	24/18493	1.93e-08	1.93e-08	3.87e-06	WT1/TEK/PDGFRA/ACTA2/NOTCH3/ANGPT1/BMP7/EGR1/OSR1/SERPINB7	10
GO:0048705	skeletal system morphogenesis	31/780	236/18493	2.02e-08	2.02e-08	3.87e-06	PRRX1/ROR2/TEK/COL6A3/PDGFRA/HOXC11/MGP/BMP6/FGF18/SCARA3/HHIP/TWIST1/BMP7/PAPPA2/HAS2/OSR1/DHRS3/GREM1/RARB/COL6A1/RARG/COL1A1/CSRNP1/SERPINH1/CTGF/COL6A2/MMP14/ANXA6/NAB2/PKD1/MEF2D	31
GO:0001558	regulation of cell growth	44/780	416/18493	2.09e-08	2.09e-08	3.87e-06	BDKRB1/WT1/CD38/RGS4/AGTR1/MYOCD/CXCL12/CACNG7/NRG3/ESM1/RIMS1/RASGRP2/SEMA3D/UNC13A/PLXNA4/NTRK3/PAPPA2/PTK2B/FBLN5/SEMA5A/NRCAM/NPPB/SLIT2/FRZB/SOX17/GNG4/HTRA1/GREM1/CRYAB/SGK1/SLIT3/BCL6/CTGF/SYT1/MMP14/APBB1/CTDP1/MEG3/DDR1/NDUFA13/PPARD/SLC9A1/TRIM46/SPOCK1	44
GO:0018108	peptidyl-tyrosine phosphorylation	42/780	387/18493	2.1e-08	2.1e-08	3.87e-06	FLT1/KIT/CCL5/EFEMP1/DDR2/ROR2/VTN/TEK/THY1/PDGFRA/CNTN1/EPHB6/KDR/FGF18/ANGPT1/CSPG4/NTRK3/FGF7/TNFRSF14/PTK2B/GHR/DOK7/NTRK2/EGF/PKDCC/BST1/GREM1/INSR/FYN/ITGA5/GPRC5B/DLG4/ERCC6/MAP2K3/ICAM1/DDR1/PPP2R5B/BCR/DYRK1B/FGF2/SH3BP5L/ARHGEF2	42
GO:0006022	aminoglycan metabolic process	25/780	167/18493	3.56e-08	3.56e-08	6.25e-06	IL1B/XYLT1/B3GAT1/ANGPT1/CSPG4/UST/HAS2/GALNT5/EGF/DCN/CEMIP/CHSY3/CHST2/SPOCK2/B3GNT9/CHPF/HS6ST1/B4GALT5/CHPF2/GPC1/ARSB/NAGLU/SLC9A1/FGF2/B4GALT1	25
GO:0003013	circulatory system process	49/780	500/18493	3.82e-08	3.82e-08	6.41e-06	POSTN/PRKG1/COL1A2/BDKRB1/CD38/RGS4/AGTR1/TBX2/SGCD/OLR1/TEK/HSPB7/HEY2/CXCL12/DRD1/ACTA2/KCNE4/CHRM3/ANGPT1/POPDC2/PLN/ATP2A3/FLI1/HRH2/KCNJ12/BDKRB2/NPPB/ACSM3/SLIT2/HEG1/ITGA1/SLC2A5/HTR1D/SGK1/VEGFB/KCNK3/FYN/CTGF/TNNT1/SNTA1/ATP2B4/ADM2/MAP2K3/ICAM1/GAA/BCR/PPARD/SLC9A1/EHD3	49
GO:0045785	positive regulation of cell adhesion	42/780	397/18493	4.36e-08	4.36e-08	6.84e-06	IL1B/ABI3BP/CCL5/FOXF1/APOA1/VTN/TEK/THY1/KDR/CXCL12/EMILIN1/FBLN2/VCAM1/ANGPT1/CHRD/BMP7/TNFSF4/HAS2/TNFRSF14/PTK2B/ITGA2/CCDC80/ITGA4/NR4A3/TGM2/COL16A1/ADGRG1/SPOCK2/KIF26B/ADAM19/BCL6/DPP4/FYN/CD55/ITGA5/SHH/FSTL3/PDCD1LG2/ICAM1/RELL2/DAG1/ROCK1	42
GO:0030203	glycosaminoglycan metabolic process	24/780	157/18493	4.42e-08	4.42e-08	6.84e-06	IL1B/XYLT1/B3GAT1/ANGPT1/CSPG4/UST/HAS2/GALNT5/EGF/DCN/CEMIP/CHSY3/CHST2/SPOCK2/CHPF/HS6ST1/B4GALT5/CHPF2/GPC1/ARSB/NAGLU/SLC9A1/FGF2/B4GALT1	24
GO:0060348	bone development	28/780	208/18493	5.74e-08	5.74e-08	8.54e-06	SULF1/KIT/XYLT1/TEK/COL6A3/MEIS1/BMP6/FGF18/SCARA3/PITX2/TWIST1/FLI1/PAPPA2/HAS2/DHRS3/GREM1/RARB/COL6A1/RARG/COL1A1/PAPSS2/SERPINH1/COL6A2/MMP14/ANXA6/SPARC/NAB2/MEF2D	28
GO:0010975	regulation of neuron projection development	47/780	478/18493	6.57e-08	6.57e-08	9.08e-06	CD38/PRRX1/NFATC4/RAB17/THY1/GRID2/CNTN1/CXCL12/CACNG7/RIMS1/SEMA3D/UNC13A/PLXNA4/BMP7/UST/NTRK3/HECW2/PTK2B/SEMA5A/NRCAM/CSMD3/NTRK2/SARM1/SLIT2/FZD4/CAMK2B/CHN1/DPYSL3/NR2F1/TNIK/BRSK2/SIPA1L1/NDRG4/ENC1/BRSK1/FYN/SYT1/APBB1/GPRC5B/DLG4/PLXNA2/ARSB/PPP2R5B/TRIM46/SPOCK1/PLXNA1/PLXNB2	47
GO:0050900	leukocyte migration	47/780	478/18493	6.57e-08	6.57e-08	9.08e-06	FLT1/COL1A2/IL1B/BDKRB1/KIT/CCL5/IL33/CD200/ROR2/OLR1/TEK/THY1/IL16/SLC7A8/CXCL12/EMILIN1/SLC7A7/VCAM1/ANGPT1/GP6/JAM2/CXCR4/TNFRSF14/PTK2B/SERPINE1/ITGA2/ITGA4/IL1R1/CCL20/SLIT2/BST1/CCL26/ITGA1/GREM1/COL1A1/VEGFB/FYN/PIK3R2/ITGA5/PIP5K1C/MMP14/TNFRSF10D/ICAM1/GPC1/BCR/B4GALT1/ROCK1	47
GO:1901342	regulation of vasculature development	43/780	421/18493	8.26e-08	8.26e-08	1.1e-05	FLT1/SULF1/IL1B/KIT/WT1/PTGIS/AGTR1/MYOCD/BMPER/TEK/HEY2/KDR/EMILIN1/FGF18/THBS2/ADGRA2/TWIST1/BMP7/PTK2B/SEMA5A/SERPINE1/CDH5/C3/EGR1/KLF2/NPPB/RHOJ/ADGRB2/DCN/GREM1/VASH1/GATA6/IL1A/VEGFB/HDAC5/CREB3L1/SERPINB7/ITGA5/ADM2/SPARC/FGF2/ADAM12/ROCK1	43
GO:0001655	urogenital system development	36/780	322/18493	1.03e-07	1.03e-07	1.32e-05	SULF1/WT1/AGTR1/FOXF1/MYOCD/BMPER/TEK/ITGA8/PDGFRA/HOXC11/BMP6/ACTA2/NOTCH3/ANGPT1/BMP7/MMP17/HAS2/EGR1/OSR1/SLIT2/DCN/SOX17/GREM1/RARB/ASS1/RARG/KIF26B/NFIA/FOXD1/SERPINB7/SHH/GDNF/FSTL3/PKD1/FGF2/LZTS2	36
GO:0008015	blood circulation	47/780	492/18493	1.56e-07	1.56e-07	1.9e-05	POSTN/PRKG1/COL1A2/BDKRB1/CD38/RGS4/AGTR1/TBX2/SGCD/OLR1/TEK/HSPB7/HEY2/CXCL12/DRD1/ACTA2/KCNE4/CHRM3/ANGPT1/POPDC2/PLN/ATP2A3/FLI1/HRH2/KCNJ12/BDKRB2/NPPB/ACSM3/SLIT2/ITGA1/SLC2A5/HTR1D/SGK1/VEGFB/KCNK3/CTGF/TNNT1/SNTA1/ATP2B4/ADM2/MAP2K3/ICAM1/GAA/BCR/PPARD/SLC9A1/EHD3	47
GO:1903510	mucopolysaccharide metabolic process	19/780	110/18493	1.57e-07	1.57e-07	1.9e-05	IL1B/XYLT1/ANGPT1/CSPG4/UST/HAS2/EGF/DCN/CEMIP/CHSY3/CHST2/SPOCK2/CHPF/B4GALT5/CHPF2/ARSB/SLC9A1/FGF2/B4GALT1	19
GO:0006023	aminoglycan biosynthetic process	19/780	111/18493	1.82e-07	1.82e-07	2.07e-05	IL1B/XYLT1/ANGPT1/CSPG4/UST/HAS2/GALNT5/EGF/DCN/CEMIP/CHSY3/CHST2/B3GNT9/CHPF/HS6ST1/B4GALT5/CHPF2/GPC1/B4GALT1	19
GO:0060349	bone morphogenesis	19/780	111/18493	1.82e-07	1.82e-07	2.07e-05	TEK/COL6A3/BMP6/FGF18/SCARA3/TWIST1/PAPPA2/HAS2/DHRS3/RARB/COL6A1/RARG/COL1A1/SERPINH1/COL6A2/MMP14/ANXA6/NAB2/MEF2D	19
GO:0060350	endochondral bone morphogenesis	15/780	71/18493	2.1e-07	2.1e-07	2.32e-05	TEK/COL6A3/BMP6/FGF18/SCARA3/RARB/COL6A1/RARG/COL1A1/SERPINH1/COL6A2/MMP14/ANXA6/NAB2/MEF2D	15
GO:0048167	regulation of synaptic plasticity	24/780	173/18493	2.87e-07	2.87e-07	3.08e-05	KIT/CD38/NFATC4/CALB2/GRID2/JPH3/DRD1/RIMS1/UNC13A/HRH2/MAP1A/PTK2B/SYT7/NTRK2/NSG1/CAMK2B/GRIN2B/RAB3A/SYNPO/SIPA1L1/BRSK1/DLG4/NCDN/UNC13B	24
GO:0006936	muscle contraction	37/780	351/18493	3.04e-07	3.04e-07	3.18e-05	PRKG1/SULF1/KIT/CD38/MYOCD/ACTG2/TMOD1/DRD1/ACTA2/KCNE4/CHRM3/PLN/LMOD1/SYNM/MYL9/ITGA2/KCNJ12/SORBS1/BDKRB2/CHRNA1/MYH14/ITGA1/CRYAB/HTR1D/VEGFB/CTGF/ITGB5/TNNT1/SNTA1/GDNF/ANXA6/TPM2/MAP2K3/GAA/SLC9A1/EHD3/ROCK1	37
GO:0022604	regulation of cell morphogenesis	45/780	474/18493	3.42e-07	3.42e-07	3.48e-05	POSTN/KIT/APOA1/NFATC4/THY1/KDR/CXCL12/CACNG7/RIMS1/SEMA3D/UNC13A/PLXNA4/UST/NTRK3/HECW2/RHOU/HAS2/PTK2B/SEMA5A/NRCAM/SYNE3/NTRK2/RHOJ/MYH14/SARM1/SLIT2/FZD4/CAMK2B/CHN1/TNIK/BRSK2/FBLN1/SIPA1L1/BRSK1/FYN/PALM/SYT1/DLG4/SPARC/ICAM1/PLXNA2/TRIM46/DAG1/PLXNA1/PLXNB2	45
GO:0002062	chondrocyte differentiation	19/780	117/18493	4.27e-07	4.27e-07	4.18e-05	SULF1/GDF6/EFEMP1/COL6A3/BMP6/FGF18/SCARA3/OSR1/PKDCC/GREM1/RARB/COL6A1/RARG/MAF/SERPINH1/CTGF/COL6A2/ANXA6/MEF2D	19
GO:0006024	glycosaminoglycan biosynthetic process	18/780	106/18493	4.32e-07	4.32e-07	4.18e-05	IL1B/XYLT1/ANGPT1/CSPG4/UST/HAS2/GALNT5/EGF/DCN/CEMIP/CHSY3/CHST2/CHPF/HS6ST1/B4GALT5/CHPF2/GPC1/B4GALT1	18
GO:0001822	kidney development	31/780	271/18493	4.77e-07	4.77e-07	4.49e-05	SULF1/WT1/AGTR1/BMPER/TEK/ITGA8/PDGFRA/HOXC11/BMP6/ACTA2/NOTCH3/ANGPT1/BMP7/MMP17/HAS2/EGR1/OSR1/SLIT2/DCN/GREM1/RARB/ASS1/KIF26B/FOXD1/SERPINB7/SHH/GDNF/FSTL3/PKD1/FGF2/LZTS2	31
GO:0050804	modulation of chemical synaptic transmission	41/780	418/18493	4.88e-07	4.88e-07	4.49e-05	IL1B/KIT/CD38/RGS4/NFATC4/CALB2/STXBP5L/ROR2/GRID2/JPH3/CACNG7/NRG3/DRD1/RIMS1/UNC13A/HRH2/MAP1A/PTK2B/SYT7/CUBN/NTRK2/SNCAIP/NSG1/CAMK2B/PLAT/GRIN2B/NPTXR/RAB3A/KCNC4/SYNPO/SIPA1L1/BRSK1/FYN/SYT1/GDNF/DLG4/S1PR2/NCDN/UNC13B/BCR/NLGN2	41
GO:0099177	regulation of trans-synaptic signaling	41/780	419/18493	5.2e-07	5.2e-07	4.67e-05	IL1B/KIT/CD38/RGS4/NFATC4/CALB2/STXBP5L/ROR2/GRID2/JPH3/CACNG7/NRG3/DRD1/RIMS1/UNC13A/HRH2/MAP1A/PTK2B/SYT7/CUBN/NTRK2/SNCAIP/NSG1/CAMK2B/PLAT/GRIN2B/NPTXR/RAB3A/KCNC4/SYNPO/SIPA1L1/BRSK1/FYN/SYT1/GDNF/DLG4/S1PR2/NCDN/UNC13B/BCR/NLGN2	41
GO:0030324	lung development	23/780	169/18493	7.14e-07	7.14e-07	6.27e-05	ADAMTS2/FOXF1/MYOCD/PDGFRA/ZFPM2/LOXL3/FGF18/HHIP/FGF7/KLF2/PKDCC/HEG1/LOX/GATA6/RAB3A/CTGF/SHH/HS6ST1/MMP14/FSTL3/SPARC/PKD1/DAG1	23
GO:0001667	ameboidal-type cell migration	43/780	456/18493	7.49e-07	7.49e-07	6.44e-05	HAND2/KIT/FAP/APOA1/BMPER/DDR2/TEK/KDR/CRB2/FGF18/PITX2/ADGRA2/SEMA3D/TWIST1/ANGPT1/BMP7/FGF7/HAS2/PTK2B/SEMA5A/ITGA2/ITGA4/RHOJ/SLIT2/DCN/SOX17/GREM1/TNS1/MAPRE2/VASH1/PKN1/HDAC5/DPP4/SYDE1/SHH/GDNF/ANXA6/AMOTL1/MAP2K3/SPARC/ARSB/PPARD/FGF2	43
GO:0014909	smooth muscle cell migration	16/780	90/18493	9.96e-07	9.96e-07	8.37e-05	POSTN/PRKG1/CCL5/MYOCD/VTN/HAS2/SERPINE1/ITGA2/NR4A3/SLIT2/PLAT/NDRG4/SORL1/DDR1/PPARD/PLXNA1	16
GO:0061564	axon development	45/780	493/18493	1.02e-06	1.02e-06	8.39e-05	NCAM2/APOA1/THY1/CXCL12/NCAM1/NFASC/SEMA3D/UNC5B/PLXNA4/EMB/NR4A2/BMP7/UST/NTRK3/CXCR4/MAP1A/SEMA5A/ITGA4/NRCAM/NR4A3/NTRK2/SLIT2/CHN1/SHC3/BRSK2/ADARB1/DOK5/RAB3A/COL25A1/FEZ1/SIPA1L1/BRSK1/FOXD1/SLIT3/FYN/SHH/GDNF/APBB1/PLXNA2/GPC1/DDR1/TRIM46/DAG1/PLXNA1/PLXNB2	45
GO:0030323	respiratory tube development	23/780	173/18493	1.08e-06	1.08e-06	8.63e-05	ADAMTS2/FOXF1/MYOCD/PDGFRA/ZFPM2/LOXL3/FGF18/HHIP/FGF7/KLF2/PKDCC/HEG1/LOX/GATA6/RAB3A/CTGF/SHH/HS6ST1/MMP14/FSTL3/SPARC/PKD1/DAG1	23
GO:0014065	phosphatidylinositol 3-kinase signaling	20/780	136/18493	1.09e-06	1.09e-06	8.63e-05	FLT1/KIT/CCL5/TEK/PDGFRA/KDR/TWIST1/UNC5B/ANGPT1/NTRK3/NYAP1/NTRK2/DCN/FYN/PIK3C2B/PIK3R2/PIP5K1C/PPP2R5B/PPARD/ENTPD5	20
GO:0048010	vascular endothelial growth factor receptor signaling pathway	16/780	91/18493	1.16e-06	1.16e-06	8.98e-05	FLT1/SULF1/IL1B/VTN/KDR/TMEM204/EMILIN1/FGF18/PTK2B/FZD4/SHC2/VEGFB/FYN/PIK3R2/ITGA5/ROCK1	16
GO:0060485	mesenchyme development	30/780	269/18493	1.24e-06	1.24e-06	9.25e-05	HAND2/IL1B/WT1/TBX2/FOXF1/ACTG2/HEY2/CRB2/ZFPM2/LOXL3/ACTA2/LDLRAD4/PITX2/SEMA3D/TWIST1/BMP7/HAS2/SEMA5A/OSR1/FRZB/TGFBR3/GREM1/COL1A1/ZNF703/FOXD1/SHH/GDNF/ANXA6/TRIM62/DAG1	30
GO:0007409	axonogenesis	42/780	449/18493	1.24e-06	1.24e-06	9.25e-05	THY1/CXCL12/NCAM1/NFASC/SEMA3D/UNC5B/PLXNA4/EMB/NR4A2/BMP7/UST/NTRK3/CXCR4/MAP1A/SEMA5A/ITGA4/NRCAM/NR4A3/NTRK2/SLIT2/CHN1/SHC3/BRSK2/ADARB1/DOK5/RAB3A/COL25A1/FEZ1/SIPA1L1/BRSK1/FOXD1/SLIT3/FYN/SHH/GDNF/APBB1/PLXNA2/GPC1/TRIM46/DAG1/PLXNA1/PLXNB2	42
GO:1904018	positive regulation of vasculature development	27/780	228/18493	1.32e-06	1.32e-06	9.65e-05	FLT1/IL1B/KIT/PTGIS/AGTR1/MYOCD/BMPER/TEK/KDR/FGF18/TWIST1/PTK2B/SEMA5A/SERPINE1/CDH5/C3/EGR1/RHOJ/GREM1/GATA6/IL1A/VEGFB/SERPINB7/ITGA5/ADM2/FGF2/ADAM12	27
GO:0014812	muscle cell migration	17/780	103/18493	1.36e-06	1.36e-06	9.74e-05	POSTN/PRKG1/CCL5/MYOCD/VTN/HAS2/SERPINE1/ITGA2/NR4A3/SLIT2/PLAT/NDRG4/SORL1/DDR1/PPARD/ROCK1/PLXNA1	17
GO:0048568	embryonic organ development	40/780	422/18493	1.6e-06	1.6e-06	0.000112597	HAND2/KIT/TBX2/FOXF1/EFEMP1/PRRX1/ROR2/ITGA8/PDGFRA/HOXC11/HEY2/KDR/CRB2/ZFPM2/TWIST1/BMP7/MAFB/LRIG1/NR4A3/OSR1/CTHRC1/FRZB/PKDCC/ALDH1A3/SOX17/MFAP2/RARB/RARG/VASH1/NDRG4/FOXL2/SHH/HS6ST1/MMP14/GDNF/PKD1/MBD2/NAGLU/BCR/MBD3	40
GO:0060537	muscle tissue development	38/780	395/18493	2.04e-06	2.04e-06	0.000139258	COL3A1/WT1/RGS4/TBX2/MYOCD/ITGA8/PDGFRA/MEIS1/PITX1/HEY2/ZFPM2/NUPR1/TWIST1/BMP7/POPDC2/PLN/MSC/CHRNA1/EGR1/MYH14/OSR1/DCN/TGFBR3/SOX17/HEG1/GREM1/RARB/DNER/GATA6/NDRG4/FOXL2/MAFF/SHH/CTDP1/GPC1/MEF2D/SLC9A1/FGF2	38
GO:0014066	regulation of phosphatidylinositol 3-kinase signaling	17/780	106/18493	2.05e-06	2.05e-06	0.000139258	FLT1/KIT/CCL5/TEK/PDGFRA/KDR/TWIST1/UNC5B/ANGPT1/NTRK3/NTRK2/DCN/FYN/PIP5K1C/PPP2R5B/PPARD/ENTPD5	17
GO:0001704	formation of primary germ layer	18/780	118/18493	2.19e-06	2.19e-06	0.00014315	FOXF1/VTN/ITGA8/CRB2/CHRD/BMP7/COL5A1/ITGA2/ITGA4/NR4A3/SOX17/COL6A1/GATA6/MMP15/ITGB5/ITGA5/MMP14/TWSG1	18
GO:0010811	positive regulation of cell-substrate adhesion	18/780	118/18493	2.19e-06	2.19e-06	0.00014315	ABI3BP/FOXF1/APOA1/VTN/TEK/THY1/KDR/EMILIN1/FBLN2/HAS2/PTK2B/CCDC80/COL16A1/SPOCK2/ITGA5/RELL2/DAG1/ROCK1	18
GO:0006029	proteoglycan metabolic process	15/780	86/18493	2.77e-06	2.77e-06	0.000178518	SULF1/XYLT1/B3GAT1/CSPG4/UST/DCN/CHSY3/SPOCK2/CHPF/EXTL2/HS6ST1/CHPF2/GPC1/ARSB/PPARD	15
GO:0007599	hemostasis	34/780	339/18493	2.82e-06	2.82e-06	0.000178518	COL3A1/PRKG1/COL1A2/A2M/FAP/HBD/CLEC1B/VTN/TSPAN8/HBG2/PDGFRA/C1QTNF1/ZFPM2/C4BPB/GP6/FLI1/MYL9/SERPINE1/ITGA2/PLAT/TFPI2/COL1A1/CD9/GATA6/FBLN1/PAPSS2/ITPK1/MAFF/FYN/SHH/MAFK/CSRP1/EHD3/MICAL1	34
GO:0050918	positive chemotaxis	13/780	66/18493	3.12e-06	3.12e-06	0.000194474	CCL5/IL16/KDR/CXCL12/ANGPT1/NTRK3/FGF7/SEMA5A/ITGA2/SAA4/VEGFB/GDNF/FGF2	13
GO:0045666	positive regulation of neuron differentiation	35/780	356/18493	3.17e-06	3.17e-06	0.000194474	GDF6/CNTN1/CXCL12/BMP6/CACNG7/RIMS1/UNC13A/PLXNA4/BMP7/NTRK3/PTK2B/SEMA5A/NRCAM/NTRK2/SLIT2/FZD4/CAMK2B/SH3GL3/DPYSL3/RARB/NDRG4/ENC1/BCL6/FYN/SYT1/APBB1/GPRC5B/DLG4/PLXNA2/ARSB/PPP2R5B/TIMP2/ARHGEF2/PLXNA1/PLXNB2	35
GO:0007517	muscle organ development	38/780	403/18493	3.3e-06	3.3e-06	0.000199226	COL3A1/WT1/RGS4/TBX2/MYOCD/JPH1/SGCD/AEBP1/COL6A3/MEIS1/PITX1/HEY2/ZFPM2/NUPR1/TWIST1/POPDC2/MSC/CHRNA1/EGR1/MYH14/DCN/TGFBR3/SOX17/HEG1/GREM1/ASS1/CRYAB/ADARB1/DNER/GATA6/FOXL2/MAFF/SHH/SPEG/CTDP1/GPC1/MEF2D/FGF2	38
GO:1903053	regulation of extracellular matrix organization	10/780	39/18493	3.51e-06	3.51e-06	0.000208987	FAP/DDR2/AEBP1/EMILIN1/HAS2/DPP4/COLGALT1/ANTXR1/DDR1/DAG1	10
GO:0050769	positive regulation of neurogenesis	41/780	453/18493	3.81e-06	3.81e-06	0.000222853	IL1B/KIT/GDF6/CNTN1/CXCL12/BMP6/CACNG7/RIMS1/UNC13A/PLXNA4/BMP7/NTRK3/CXCR4/PTK2B/SEMA5A/NRCAM/NTRK2/SLIT2/FZD4/CAMK2B/SH3GL3/DPYSL3/RARB/NDRG4/ENC1/BCL6/FYN/SMARCD3/SYT1/SHH/APBB1/GPRC5B/DLG4/PLXNA2/ARSB/PPP2R5B/TIMP2/DAG1/ARHGEF2/PLXNA1/PLXNB2	41
GO:0007596	blood coagulation	33/780	334/18493	5.43e-06	5.43e-06	0.000307965	COL3A1/PRKG1/COL1A2/A2M/FAP/HBD/CLEC1B/VTN/TSPAN8/HBG2/PDGFRA/C1QTNF1/ZFPM2/C4BPB/GP6/MYL9/SERPINE1/ITGA2/PLAT/TFPI2/COL1A1/CD9/GATA6/FBLN1/PAPSS2/ITPK1/MAFF/FYN/SHH/MAFK/CSRP1/EHD3/MICAL1	33
GO:0045834	positive regulation of lipid metabolic process	19/780	138/18493	5.48e-06	5.48e-06	0.000307965	FLT1/IL1B/KIT/AGTR1/AADAC/APOA1/TEK/PDGFRA/TNFAIP8L3/CCDC3/BMP6/TWIST1/C1QTNF2/PTK2B/SORBS1/NR4A3/LDLRAP1/STARD4/FGF2	19
GO:0097485	neuron projection guidance	28/780	260/18493	5.51e-06	5.51e-06	0.000307965	CXCL12/NCAM1/NFASC/SEMA3D/UNC5B/PLXNA4/EMB/BMP7/CXCR4/SEMA5A/NRCAM/NR4A3/DPYSL4/SLIT2/CHN1/SHC3/DOK5/FEZ1/FOXD1/SLIT3/FYN/SHH/GDNF/PLXNA2/GPC1/DAG1/PLXNA1/PLXNB2	28
GO:0048608	reproductive structure development	39/780	428/18493	5.58e-06	5.58e-06	0.000307965	SULF1/KIT/WT1/PTGIS/MYOCD/ROR2/PDGFRA/HEY2/BMP6/ZFPM2/NUPR1/PTX3/BMP7/STOX2/OSR1/SLIT2/DCN/FZD4/HTRA1/REC8/RARG/INSR/MMP19/ADGRG1/VASH1/GATA6/ADAM19/FOXL2/SLIT3/SHH/HS6ST1/MMP14/FSTL3/CTSB/ICAM1/PKD1/BCL2L2/PPARD/STC2	39
GO:0045765	regulation of angiogenesis	36/780	381/18493	5.69e-06	5.69e-06	0.000308203	FLT1/SULF1/IL1B/PTGIS/AGTR1/BMPER/TEK/KDR/EMILIN1/FGF18/THBS2/ADGRA2/TWIST1/PTK2B/SEMA5A/SERPINE1/CDH5/C3/KLF2/NPPB/RHOJ/ADGRB2/DCN/GREM1/VASH1/GATA6/IL1A/VEGFB/HDAC5/CREB3L1/ITGA5/ADM2/SPARC/FGF2/ADAM12/ROCK1	36
GO:0030574	collagen catabolic process	10/780	41/18493	5.74e-06	5.74e-06	0.000308203	ADAMTS2/FAP/ADAMTS14/MMP7/MMP19/MMP15/MMP14/CTSB/MRC2/CTSD	10
GO:0007162	negative regulation of cell adhesion	29/780	276/18493	6.11e-06	6.11e-06	0.000323774	POSTN/PRKG1/APOA1/C1QTNF1/CXCL12/LOXL3/ANGPT1/PLXNA4/TNFSF4/JAM2/TNFRSF14/SEMA5A/SERPINE1/FZD4/ASS1/COL1A1/CD9/ZNF703/FBLN1/LPXN/BCL6/SHH/MMP14/PDCD1LG2/PLXNA2/TWSG1/SPOCK1/PLXNA1/PLXNB2	29
GO:0014068	positive regulation of phosphatidylinositol 3-kinase signaling	13/780	70/18493	6.2e-06	6.2e-06	0.00032403	FLT1/KIT/CCL5/TEK/PDGFRA/KDR/UNC5B/ANGPT1/NTRK3/NTRK2/DCN/FYN/PPARD	13
GO:0061458	reproductive system development	39/780	431/18493	6.58e-06	6.58e-06	0.000338958	SULF1/KIT/WT1/PTGIS/MYOCD/ROR2/PDGFRA/HEY2/BMP6/ZFPM2/NUPR1/PTX3/BMP7/STOX2/OSR1/SLIT2/DCN/FZD4/HTRA1/REC8/RARG/INSR/MMP19/ADGRG1/VASH1/GATA6/ADAM19/FOXL2/SLIT3/SHH/HS6ST1/MMP14/FSTL3/CTSB/ICAM1/PKD1/BCL2L2/PPARD/STC2	39
GO:0070208	protein heterotrimerization	6/780	13/18493	7.35e-06	7.35e-06	0.000373711	COL1A2/C1QTNF1/C1QTNF2/COL6A1/COL1A1/COL6A2	6
GO:0048017	inositol lipid-mediated signaling	21/780	167/18493	7.67e-06	7.67e-06	0.000385096	FLT1/KIT/CCL5/TEK/PDGFRA/TNFAIP8L3/KDR/TWIST1/UNC5B/ANGPT1/NTRK3/NYAP1/NTRK2/DCN/FYN/PIK3C2B/PIK3R2/PIP5K1C/PPP2R5B/PPARD/ENTPD5	21
GO:0050817	coagulation	33/780	340/18493	7.91e-06	7.91e-06	0.000392101	COL3A1/PRKG1/COL1A2/A2M/FAP/HBD/CLEC1B/VTN/TSPAN8/HBG2/PDGFRA/C1QTNF1/ZFPM2/C4BPB/GP6/MYL9/SERPINE1/ITGA2/PLAT/TFPI2/COL1A1/CD9/GATA6/FBLN1/PAPSS2/ITPK1/MAFF/FYN/SHH/MAFK/CSRP1/EHD3/MICAL1	33
GO:0036293	response to decreased oxygen levels	32/780	325/18493	8.06e-06	8.06e-06	0.000394487	POSTN/PTGIS/CD38/MYOCD/TEK/CXCL12/CARD16/VCAM1/TWIST1/HIF3A/NR4A2/BMP7/CXCR4/PTK2B/ITGA2/EGR1/PLAT/TGFBR3/CRYAB/GATA6/VEGFB/KCNK3/DPP4/CTGF/MMP14/PLOD1/PLK3/ICAM1/ALAD/PPARD/STC2/SLC9A1	32
GO:0048048	embryonic eye morphogenesis	9/780	34/18493	8.18e-06	8.18e-06	0.000395155	TBX2/EFEMP1/TWIST1/BMP7/ALDH1A3/MFAP2/RARB/RARG/FOXL2	9
GO:0014910	regulation of smooth muscle cell migration	14/780	83/18493	8.88e-06	8.88e-06	0.000423865	POSTN/PRKG1/CCL5/MYOCD/VTN/HAS2/SERPINE1/ITGA2/NR4A3/SLIT2/NDRG4/SORL1/PPARD/PLXNA1	14
GO:0060384	innervation	8/780	27/18493	1.05e-05	1.05e-05	0.000489369	SULF1/VCAM1/UNC13A/LRIG1/ITGA4/ADARB1/COL25A1/UNC13B	8
GO:0001666	response to hypoxia	31/780	314/18493	1.05e-05	1.05e-05	0.000489369	POSTN/PTGIS/CD38/MYOCD/TEK/CXCL12/CARD16/VCAM1/TWIST1/HIF3A/NR4A2/BMP7/CXCR4/PTK2B/ITGA2/EGR1/PLAT/TGFBR3/CRYAB/GATA6/VEGFB/KCNK3/DPP4/MMP14/PLOD1/PLK3/ICAM1/ALAD/PPARD/STC2/SLC9A1	31
GO:0048562	embryonic organ morphogenesis	29/780	284/18493	1.06e-05	1.06e-05	0.000489369	HAND2/TBX2/FOXF1/EFEMP1/PRRX1/ROR2/ITGA8/PDGFRA/HOXC11/CRB2/TWIST1/BMP7/MAFB/LRIG1/NR4A3/OSR1/CTHRC1/FRZB/ALDH1A3/SOX17/MFAP2/RARB/RARG/NDRG4/FOXL2/SHH/MMP14/NAGLU/BCR	29
GO:0001101	response to acid chemical	32/780	332/18493	1.25e-05	1.25e-05	0.000564997	COL3A1/COL1A2/CD38/NFATC4/PDGFRA/KDR/BMP6/TNFSF4/NTRK3/PTK2B/ITGA2/EGR1/KLF2/NTRK2/OSR1/FZD4/TGFBR3/RARB/COL6A1/ASS1/RARG/COL16A1/COL1A1/CD9/FYN/CTGF/SCD/ATP2B4/SPARC/ICAM1/NDUFA13/ALAD	32
GO:0014706	striated muscle tissue development	35/780	379/18493	1.26e-05	1.26e-05	0.000564997	WT1/RGS4/TBX2/MYOCD/PDGFRA/MEIS1/PITX1/HEY2/ZFPM2/NUPR1/TWIST1/BMP7/POPDC2/PLN/MSC/CHRNA1/EGR1/MYH14/DCN/TGFBR3/SOX17/HEG1/GREM1/RARB/DNER/GATA6/NDRG4/FOXL2/MAFF/SHH/CTDP1/GPC1/MEF2D/SLC9A1/FGF2	35
GO:0045766	positive regulation of angiogenesis	23/780	200/18493	1.29e-05	1.29e-05	0.000572858	FLT1/IL1B/PTGIS/AGTR1/BMPER/TEK/KDR/FGF18/TWIST1/PTK2B/SEMA5A/SERPINE1/CDH5/C3/RHOJ/GREM1/GATA6/IL1A/VEGFB/ITGA5/ADM2/FGF2/ADAM12	23
GO:0070482	response to oxygen levels	33/780	349/18493	1.36e-05	1.36e-05	0.000599139	POSTN/PTGIS/CD38/MYOCD/TEK/CXCL12/CARD16/VCAM1/TWIST1/HIF3A/NR4A2/BMP7/CXCR4/PTK2B/ITGA2/EGR1/PLAT/TGFBR3/COL1A1/CRYAB/GATA6/VEGFB/KCNK3/DPP4/CTGF/MMP14/PLOD1/PLK3/ICAM1/ALAD/PPARD/STC2/SLC9A1	33
GO:0035987	endodermal cell differentiation	10/780	45/18493	1.4e-05	1.4e-05	0.000608935	VTN/COL5A1/ITGA4/SOX17/COL6A1/GATA6/MMP15/ITGB5/ITGA5/MMP14	10
GO:0007411	axon guidance	27/780	259/18493	1.46e-05	1.46e-05	0.000628575	CXCL12/NCAM1/NFASC/SEMA3D/UNC5B/PLXNA4/EMB/BMP7/CXCR4/SEMA5A/NRCAM/NR4A3/SLIT2/CHN1/SHC3/DOK5/FEZ1/FOXD1/SLIT3/FYN/SHH/GDNF/PLXNA2/GPC1/DAG1/PLXNA1/PLXNB2	27
GO:0007229	integrin-mediated signaling pathway	15/780	99/18493	1.65e-05	1.65e-05	0.00069238	COL3A1/APOA1/ITGA8/THY1/LOXL3/PTK2B/ITGA2/ITGA4/BST1/ITGA1/COL16A1/LIMS2/CTGF/ITGB5/ITGA5	15
GO:0050808	synapse organization	35/780	384/18493	1.66e-05	1.66e-05	0.00069238	LRRN3/NFATC4/RAB17/ELFN1/GRID2/PDZRN3/DRD1/NFASC/UNC13A/NTRK3/NRCAM/CHRNA1/NTRK2/ARHGAP22/ADGRB2/CAMK2B/GRIN2B/INSR/DNER/RAB3A/SPOCK2/SYNPO/SIPA1L1/NFIA/ADGRL1/FYN/PALM/TPBG/GDNF/DLG4/SPARC/DCTN1/UNC13B/NLGN2/DAG1	35
GO:0072006	nephron development	18/780	136/18493	1.67e-05	1.67e-05	0.00069238	SULF1/WT1/TEK/PDGFRA/ACTA2/NOTCH3/ANGPT1/BMP7/EGR1/OSR1/GREM1/KIF26B/FOXD1/SERPINB7/SHH/GDNF/PKD1/FGF2	18
GO:0001764	neuron migration	19/780	149/18493	1.68e-05	1.68e-05	0.00069238	COL3A1/PRKG1/CXCL12/NRG3/DRD1/TWIST1/NR4A2/NTRK3/NRCAM/NTRK2/CAMK2B/ADGRG1/DNER/FYN/NAV1/TRIM46/ARHGEF2/SPOCK1/PLXNB2	19
GO:0001570	vasculogenesis	13/780	77/18493	1.83e-05	1.83e-05	0.000744438	WT1/FOXF1/MYOCD/HEY2/KDR/ZFPM2/HAS2/NTRK2/FZD4/TGFBR3/SOX17/HEG1/SHH	13
GO:0048015	phosphatidylinositol-mediated signaling	20/780	164/18493	1.98e-05	1.98e-05	0.000798179	FLT1/KIT/CCL5/TEK/PDGFRA/KDR/TWIST1/UNC5B/ANGPT1/NTRK3/NYAP1/NTRK2/DCN/FYN/PIK3C2B/PIK3R2/PIP5K1C/PPP2R5B/PPARD/ENTPD5	20
GO:0034332	adherens junction organization	18/780	139/18493	2.26e-05	2.26e-05	0.000899934	CADM3/TEK/THY1/KDR/CADM2/PTK2B/ITGA2/CDH5/SORBS1/GREM1/COL16A1/ZNF703/CDH6/MAPRE2/PIP5K1C/MMP14/SLC9A1/ROCK1	18
GO:0002685	regulation of leukocyte migration	21/780	180/18493	2.44e-05	2.44e-05	0.000962993	BDKRB1/CCL5/IL33/CD200/THY1/CXCL12/EMILIN1/TNFRSF14/PTK2B/SERPINE1/ITGA2/ITGA4/IL1R1/CCL20/SLIT2/BST1/GREM1/VEGFB/MMP14/ICAM1/BCR	21
GO:0007369	gastrulation	21/780	181/18493	2.65e-05	2.65e-05	0.00102237	FOXF1/APOA1/VTN/ITGA8/CRB2/CHRD/BMP7/COL5A1/ITGA2/ITGA4/NR4A3/OSR1/SOX17/COL6A1/GATA6/MMP15/ITGB5/ITGA5/MMP14/TWSG1/DAG1	21
GO:0035265	organ growth	22/780	195/18493	2.67e-05	2.67e-05	0.00102237	WT1/RGS4/TBX2/DDR2/COL6A3/MEIS1/HEY2/ZFPM2/SCARA3/FGF7/TGFBR3/HEG1/RARB/COL6A1/RARG/GATA6/NDRG4/COL6A2/SHH/ANXA6/CTDP1/FGF2	22
GO:0046545	development of primary female sexual characteristics	15/780	103/18493	2.67e-05	2.67e-05	0.00102237	KIT/WT1/PDGFRA/ZFPM2/NUPR1/PTX3/SLIT2/FZD4/INSR/MMP19/FOXL2/SLIT3/MMP14/LHFPL2/ICAM1	15
GO:0072203	cell proliferation involved in metanephros development	5/780	10/18493	2.78e-05	2.78e-05	0.00105443	WT1/BMP7/EGR1/OSR1/SHH	5
GO:0043583	ear development	23/780	210/18493	2.84e-05	2.84e-05	0.00105592	PRRX1/BMPER/ROR2/ITGA8/HEY2/TWIST1/NTRK3/MAFB/LRIG1/NR4A3/OSR1/CTHRC1/FRZB/ALDH1A3/MAF/KCNK3/SHH/SPARC/LRP10/DDR1/NAGLU/BCR/TPRN	23
GO:0048762	mesenchymal cell differentiation	23/780	210/18493	2.84e-05	2.84e-05	0.00105592	HAND2/IL1B/HEY2/CRB2/LOXL3/LDLRAD4/PITX2/SEMA3D/TWIST1/BMP7/HAS2/SEMA5A/OSR1/FRZB/TGFBR3/GREM1/COL1A1/ZNF703/SHH/GDNF/ANXA6/TRIM62/DAG1	23
GO:0010976	positive regulation of neuron projection development	27/780	269/18493	2.88e-05	2.88e-05	0.00106149	CNTN1/CXCL12/CACNG7/RIMS1/UNC13A/PLXNA4/BMP7/NTRK3/PTK2B/SEMA5A/NTRK2/SLIT2/FZD4/CAMK2B/DPYSL3/NDRG4/ENC1/FYN/SYT1/APBB1/GPRC5B/DLG4/PLXNA2/ARSB/PPP2R5B/PLXNA1/PLXNB2	27
GO:0032330	regulation of chondrocyte differentiation	10/780	49/18493	3.1e-05	3.1e-05	0.0011306	GDF6/EFEMP1/BMP6/FGF18/PKDCC/GREM1/RARB/RARG/MAF/CTGF	10
GO:0002691	regulation of cellular extravasation	7/780	23/18493	3.13e-05	3.13e-05	0.00113173	THY1/CXCL12/ITGA4/IL1R1/BST1/ICAM1/BCR	7
GO:0002009	morphogenesis of an epithelium	40/780	479/18493	3.27e-05	3.27e-05	0.00116875	HAND2/SULF1/WT1/TBX2/FOXF1/NFATC4/ROR2/HHIP/TWIST1/BMP7/SALL4/FGF7/COL5A1/TMEFF2/OSR1/EGF/TGM2/SLIT2/CTHRC1/FZD4/FRZB/ALDH1A3/SOX17/GREM1/RARG/BRSK2/NDRG4/KIF26B/BRSK1/FOXD1/ITGA5/SHH/MMP14/GDNF/PKD1/DDR1/FGF2/DAG1/PLXNA1/PLXNB2	40
GO:0071526	semaphorin-plexin signaling pathway	9/780	40/18493	3.4e-05	3.4e-05	0.00120473	HAND2/NCAM1/SEMA3D/PLXNA4/SEMA5A/GDNF/PLXNA2/PLXNA1/PLXNB2	9
GO:0032835	glomerulus development	11/780	60/18493	3.62e-05	3.62e-05	0.00127284	SULF1/WT1/TEK/PDGFRA/ACTA2/NOTCH3/ANGPT1/BMP7/EGR1/OSR1/SERPINB7	11
GO:0001706	endoderm formation	10/780	50/18493	3.73e-05	3.73e-05	0.00129144	VTN/COL5A1/ITGA4/SOX17/COL6A1/GATA6/MMP15/ITGB5/ITGA5/MMP14	10
GO:0043405	regulation of MAP kinase activity	31/780	335/18493	3.74e-05	3.74e-05	0.00129144	FLT1/IL1B/KIT/RGS4/ROR2/FGF18/CSPG4/BMP7/NTRK3/CXCR4/C1QTNF2/PTK2B/GHR/EGF/FZD4/SHC2/TRIB2/DUSP2/ITGA1/KSR1/TNIK/INSR/SORL1/PKN1/GADD45G/ERCC6/MAP2K3/INPP5K/S1PR2/SMPD1/FGF2	31
GO:0050731	positive regulation of peptidyl-tyrosine phosphorylation	21/780	186/18493	3.99e-05	3.99e-05	0.00136563	KIT/CCL5/VTN/CNTN1/ANGPT1/CSPG4/FGF7/TNFRSF14/PTK2B/GHR/DOK7/NTRK2/EGF/GREM1/FYN/ITGA5/GPRC5B/DLG4/ERCC6/ICAM1/ARHGEF2	21
GO:0072210	metanephric nephron development	9/780	41/18493	4.19e-05	4.19e-05	0.00142111	WT1/PDGFRA/EGR1/OSR1/GREM1/KIF26B/FOXD1/GDNF/PKD1	9
GO:0050730	regulation of peptidyl-tyrosine phosphorylation	25/780	245/18493	4.29e-05	4.29e-05	0.00143079	KIT/CCL5/VTN/THY1/CNTN1/ANGPT1/CSPG4/FGF7/TNFRSF14/PTK2B/GHR/DOK7/NTRK2/EGF/BST1/GREM1/FYN/ITGA5/GPRC5B/DLG4/ERCC6/ICAM1/PPP2R5B/SH3BP5L/ARHGEF2	25
GO:0070374	positive regulation of ERK1 and ERK2 cascade	25/780	245/18493	4.29e-05	4.29e-05	0.00143079	HAND2/FLT1/KIT/CCL5/BMPER/DDR2/ROR2/TEK/PDGFRA/TNFAIP8L3/EPHB6/KDR/FGF18/ANGPT1/NTRK3/PTK2B/NTRK2/CCL20/CCL26/INSR/NDRG4/CTGF/ICAM1/DDR1/FGF2	25
GO:0051923	sulfation	6/780	17/18493	4.58e-05	4.58e-05	0.00151409	SULT1E1/SULT1B1/UST/SULT1C4/SULT1A3/TPST1	6
GO:0031346	positive regulation of cell projection organization	33/780	371/18493	4.68e-05	4.68e-05	0.00152656	KIT/CNTN1/CXCL12/CACNG7/RIMS1/UNC13A/PLXNA4/BMP7/NTRK3/PTK2B/SEMA5A/ITGA2/LCN2/NTRK2/SLIT2/FZD4/CAMK2B/DPYSL3/NDRG4/ENC1/FYN/PALM/SYT1/APBB1/GPRC5B/DLG4/PLXNA2/ARSB/PPP2R5B/MARK4/KCTD17/PLXNA1/PLXNB2	33
GO:0090130	tissue migration	32/780	355/18493	4.7e-05	4.7e-05	0.00152656	KIT/FAP/FOXF1/APOA1/BMPER/ACTG2/TEK/KDR/ACTA2/FGF18/ADGRA2/ANGPT1/FGF7/HAS2/PTK2B/SEMA5A/ITGA2/RHOJ/SLIT2/DCN/GREM1/MAPRE2/VASH1/PKN1/HDAC5/DPP4/AMOTL1/MAP2K3/SPARC/ARSB/PPARD/FGF2	32
GO:0007178	transmembrane receptor protein serine/threonine kinase signaling pathway	31/780	340/18493	4.96e-05	4.96e-05	0.00159676	COL3A1/COL1A2/SULF1/GDF6/MYOCD/BMPER/ROR2/ITGA8/CRB2/BMP6/EMILIN1/LDLRAD4/CHRD/BMP7/NRROS/CDH5/EGR1/TGFBR3/HTRA1/GREM1/ZNF703/FOXD1/ITGB5/SNX25/SHH/FSTL3/FAM83G/LTBP1/DKK3/TWSG1/LTBP2	31
GO:0070371	ERK1 and ERK2 cascade	31/780	341/18493	5.24e-05	5.24e-05	0.00166197	HAND2/FLT1/IL1B/KIT/TIMP3/CCL5/BMPER/DDR2/ROR2/TEK/PDGFRA/TNFAIP8L3/EPHB6/KDR/EMILIN1/FGF18/ANGPT1/NTRK3/PTK2B/NTRK2/EGF/CCL20/CCL26/INSR/FBLN1/NDRG4/CTGF/SULT1A3/ICAM1/DDR1/FGF2	31
GO:0030947	regulation of vascular endothelial growth factor receptor signaling pathway	8/780	33/18493	5.25e-05	5.25e-05	0.00166197	FLT1/IL1B/VTN/TMEM204/EMILIN1/FGF18/FZD4/ITGA5	8
GO:0032964	collagen biosynthetic process	10/780	52/18493	5.32e-05	5.32e-05	0.00167306	EMILIN1/COL5A1/ITGA2/LARP6/COL1A1/SERPINH1/CREB3L1/SERPINB7/CTGF/PPARD	10
GO:0051271	negative regulation of cellular component movement	33/780	374/18493	5.48e-05	5.48e-05	0.00170778	COL3A1/PRKG1/SULF1/IL33/MYOCD/CD200/THY1/CXCL12/NRG3/EMILIN1/LDLRAD4/SEMA3D/CHRD/SEMA5A/SERPINE1/TMEFF2/SLIT2/DCN/TGFBR3/DPYSL3/GREM1/CD9/ADARB1/ADGRG1/VASH1/FBLN1/NDRG4/HDAC5/SHH/BCR/PPARD/FGF2/DAG1	33
GO:0022617	extracellular matrix disassembly	12/780	74/18493	5.76e-05	5.76e-05	0.0017826	A2M/FAP/DDR2/ADAMTS4/MMP7/HTRA1/MMP19/MMP15/DPP4/MMP14/DDR1/TIMP2	12
GO:0008585	female gonad development	14/780	98/18493	6.11e-05	6.11e-05	0.00187408	KIT/WT1/PDGFRA/ZFPM2/NUPR1/PTX3/SLIT2/FZD4/INSR/MMP19/FOXL2/SLIT3/MMP14/ICAM1	14
GO:0050878	regulation of body fluid levels	40/780	493/18493	6.19e-05	6.19e-05	0.00188467	COL3A1/PRKG1/COL1A2/A2M/FAP/HBD/CLEC1B/VTN/TSPAN8/HBG2/PDGFRA/C1QTNF1/ZFPM2/CHRM3/C4BPB/GP6/FLI1/HAS2/MYL9/SERPINE1/ITGA2/NPPB/PLAT/TFPI2/HEG1/COL1A1/CD9/GATA6/FBLN1/PAPSS2/ITPK1/MAFF/FYN/SHH/MAFK/INPP5K/CSRP1/DDR1/EHD3/MICAL1	40
GO:0050654	chondroitin sulfate proteoglycan metabolic process	9/780	43/18493	6.26e-05	6.26e-05	0.00188901	XYLT1/B3GAT1/CSPG4/DCN/CHSY3/SPOCK2/CHPF/CHPF2/ARSB	9
GO:0090596	sensory organ morphogenesis	25/780	251/18493	6.39e-05	6.39e-05	0.00191486	TBX2/EFEMP1/PRRX1/ROR2/ITGA8/THY1/MEIS1/PITX2/TWIST1/BMP7/MAFB/LRIG1/COL5A1/NR4A3/NTRK2/OSR1/CTHRC1/FRZB/ALDH1A3/MFAP2/RARB/RARG/FOXL2/NAGLU/BCR	25
GO:0032102	negative regulation of response to external stimulus	30/780	329/18493	6.51e-05	6.51e-05	0.00193656	PRKG1/PTGIS/FAP/FOXF1/APOA1/CD200/VTN/TEK/TSPAN8/GRID2/PDGFRA/C1QTNF1/CARD16/DRD1/SEMA3D/TNFAIP6/SEMA5A/SERPINE1/CDH5/SLIT2/PLAT/HTRA1/GREM1/NT5E/CD9/METRNL/SMPDL3B/BCR/PPARD/FGF2	30
GO:0045123	cellular extravasation	10/780	54/18493	7.46e-05	7.46e-05	0.00217072	THY1/CXCL12/VCAM1/ITGA4/IL1R1/BST1/ITGA1/ICAM1/BCR/ROCK1	10
GO:0070206	protein trimerization	10/780	54/18493	7.46e-05	7.46e-05	0.00217072	COL1A2/C1QTNF1/EMILIN1/C1QTNF2/LCN2/CUBN/COL6A1/COL1A1/COL6A2/TRIM6	10
GO:0001958	endochondral ossification	7/780	26/18493	7.53e-05	7.53e-05	0.00217072	TEK/BMP6/FGF18/COL1A1/MMP14/NAB2/MEF2D	7
GO:0036075	replacement ossification	7/780	26/18493	7.53e-05	7.53e-05	0.00217072	TEK/BMP6/FGF18/COL1A1/MMP14/NAB2/MEF2D	7
GO:0043087	regulation of GTPase activity	39/780	481/18493	7.74e-05	7.74e-05	0.00221558	PRKG1/A2M/CCL5/RGS4/ARHGAP20/STXBP5L/THY1/RASGRP2/PLXNA4/NTRK3/ADAP1/ELMOD1/PTK2B/NTRK2/ARHGAP22/CCL20/SLIT2/CHN1/CCL26/MAPRE2/SIPA1L1/RGS11/BCL6/ARHGAP24/EVI5L/PIK3R2/TBC1D2B/SYDE1/ARAP2/ICAM1/PLXNA2/AGAP3/ARHGAP23/BCR/SBF1/ARHGAP1/GPSM1/PLXNA1/PLXNB2	39
GO:0034333	adherens junction assembly	13/780	88/18493	7.81e-05	7.81e-05	0.0022183	TEK/THY1/KDR/PTK2B/ITGA2/SORBS1/GREM1/COL16A1/ZNF703/PIP5K1C/MMP14/SLC9A1/ROCK1	13
GO:0006874	cellular calcium ion homeostasis	37/780	448/18493	8.05e-05	8.05e-05	0.00226577	BDKRB1/SLC24A3/CCL5/CD38/AGTR1/JPH1/CALB2/THY1/PDGFRA/C1QTNF1/PTGIR/CXCL12/JPH3/DRD1/PLN/ATP2A3/CXCR4/PTK2B/BDKRB2/CCRL2/S1PR3/TGM2/CEMIP/GRIN2B/RIC3/SYNPO/KCNK3/FYN/CD55/ANXA6/ATP2B4/DLG4/PKD1/STC2/FGF2/ATP2C1/KCTD17	37
GO:1901550	regulation of endothelial cell development	5/780	12/18493	8.15e-05	8.15e-05	0.00226577	IL1B/CDH5/S1PR3/S1PR2/ROCK1	5
GO:1903140	regulation of establishment of endothelial barrier	5/780	12/18493	8.15e-05	8.15e-05	0.00226577	IL1B/CDH5/S1PR3/S1PR2/ROCK1	5
GO:0001656	metanephros development	13/780	89/18493	8.79e-05	8.79e-05	0.0024079	WT1/ITGA8/PDGFRA/HOXC11/BMP7/EGR1/OSR1/GREM1/KIF26B/FOXD1/SHH/GDNF/PKD1	13
GO:0060021	roof of mouth development	13/780	89/18493	8.79e-05	8.79e-05	0.0024079	HAND2/TBX2/PRRX1/PDGFRA/LOXL3/TWIST1/MSC/OSR1/PKDCC/DHRS3/TGFBR3/CSRNP1/SHH	13
GO:0061138	morphogenesis of a branching epithelium	20/780	182/18493	8.85e-05	8.85e-05	0.0024079	SULF1/WT1/FOXF1/NFATC4/HHIP/BMP7/FGF7/EGF/TGM2/SLIT2/GREM1/FOXD1/SHH/MMP14/GDNF/PKD1/DDR1/FGF2/DAG1/PLXNA1	20
GO:0048732	gland development	36/780	434/18493	9.17e-05	9.17e-05	0.00247776	HAND2/SULF1/WT1/TBX2/FOXF1/APOA1/VTN/PDGFRA/PITX1/NRG3/PITX2/BMP7/MAFB/FGF7/HRH2/ITGA2/EGF/TGM2/FRZB/ALDH1A3/TGFBR3/RARB/ASS1/RARG/INSR/LIMS2/ZNF703/GATA6/SHH/FSTL3/PKD1/DDR1/DKK3/TWSG1/DAG1/PLXNA1	36
GO:0060216	definitive hemopoiesis	6/780	19/18493	9.35e-05	9.35e-05	0.0024912	TEK/MEIS1/MFAP5/LYL1/TGFBR3/BCR	6
GO:0072111	cell proliferation involved in kidney development	6/780	19/18493	9.35e-05	9.35e-05	0.0024912	WT1/BMP7/EGR1/OSR1/SERPINB7/SHH	6
GO:0048839	inner ear development	20/780	183/18493	9.55e-05	9.55e-05	0.00252754	PRRX1/BMPER/ROR2/ITGA8/HEY2/NTRK3/MAFB/LRIG1/NR4A3/CTHRC1/FRZB/ALDH1A3/MAF/KCNK3/SHH/SPARC/LRP10/NAGLU/BCR/TPRN	20
GO:0003151	outflow tract morphogenesis	12/780	78/18493	9.78e-05	9.78e-05	0.00257156	HAND2/TBX2/HEY2/ZFPM2/PITX2/TWIST1/BMP7/DHRS3/TGFBR3/SOX17/RARB/GATA6	12
GO:0035249	synaptic transmission, glutamatergic	13/780	90/18493	9.89e-05	9.89e-05	0.00258232	ROR2/GRID2/CACNG7/DRD1/UNC13A/PTK2B/CUBN/SHC3/SLC1A4/SYT1/CNIH3/UNC13B/NLGN2	13
GO:0030308	negative regulation of cell growth	20/780	184/18493	0.00010297	0.00010297	0.00267118	BDKRB1/WT1/RGS4/SEMA3D/SEMA5A/NPPB/SLIT2/FRZB/SOX17/GNG4/GREM1/CRYAB/SLIT3/BCL6/APBB1/CTDP1/MEG3/NDUFA13/PPARD/TRIM46	20
GO:0050673	epithelial cell proliferation	35/780	420/18493	0.000104344	0.000104344	0.00267719	FLT1/SULF1/KIT/CCL5/FAP/AGTR1/APOA1/BMPER/TEK/KDR/CXCL12/BMP6/TWIST1/FGF7/HAS2/SEMA5A/ITGA4/NR4A3/OSR1/TGFBR3/HTRA1/CCL26/LIMS2/ZNF703/VASH1/VEGFB/KLF9/SHH/MMP14/SPARC/BCL2L2/PPARD/FGF2/B4GALT1/SIDT2	35
GO:0060538	skeletal muscle organ development	19/780	170/18493	0.000105058	0.000105058	0.00267719	WT1/MYOCD/PITX1/NUPR1/TWIST1/POPDC2/MSC/CHRNA1/EGR1/MYH14/DCN/SOX17/ASS1/DNER/FOXL2/MAFF/SHH/GPC1/MEF2D	19
GO:0002683	negative regulation of immune system process	36/780	437/18493	0.000105279	0.000105279	0.00267719	COL3A1/A2M/IL33/FOXF1/APOA1/CD200/RAB7B/THY1/MEIS1/CXCL12/EMILIN1/LOXL3/ANGPT1/C4BPB/TNFSF4/MAFB/CD14/TNFRSF14/PTK2B/SARM1/MEIS2/SLIT2/HTRA1/GREM1/HIST1H4H/LPXN/PKN1/BCL6/MICA/CD55/SMPDL3B/SHH/FSTL3/PDCD1LG2/BCR/TWSG1	36
GO:0048863	stem cell differentiation	21/780	199/18493	0.000106806	0.000106806	0.00269825	HAND2/KIT/A2M/TBX2/MYOCD/PDGFRA/PITX2/SEMA3D/TWIST1/BMP7/SEMA5A/LMO2/OSR1/FRZB/SOX17/GREM1/GATA6/TRIM6/SHH/GDNF/ANXA6	21
GO:0060351	cartilage development involved in endochondral bone morphogenesis	9/780	46/18493	0.000109133	0.000109133	0.00273914	COL6A3/SCARA3/RARB/COL6A1/RARG/COL1A1/SERPINH1/COL6A2/ANXA6	9
GO:0050708	regulation of protein secretion	36/780	438/18493	0.000110207	0.000110207	0.00274825	POSTN/IL1B/CCL5/IL33/CD38/APOA1/CD200/STXBP5L/BMP6/CARD16/TWIST1/ANGPT1/TNFSF4/CD14/SSC5D/NLRP1/TNFRSF14/SYT7/SLC2A2/KCNS3/PANX2/CASP1/BRSK2/IL1A/SCAMP5/DPP4/TRIM6/APBB1/HK1/RAB11FIP5/UNC13B/PPARD/PANX1/NLGN2/C2CD2L/SIDT2	36
GO:0070372	regulation of ERK1 and ERK2 cascade	29/780	324/18493	0.000118799	0.000118799	0.00292682	HAND2/FLT1/IL1B/KIT/TIMP3/CCL5/BMPER/DDR2/ROR2/TEK/PDGFRA/TNFAIP8L3/EPHB6/KDR/EMILIN1/FGF18/ANGPT1/NTRK3/PTK2B/NTRK2/CCL20/CCL26/INSR/FBLN1/NDRG4/CTGF/ICAM1/DDR1/FGF2	29
GO:0061035	regulation of cartilage development	11/780	68/18493	0.000119257	0.000119257	0.00292682	GDF6/EFEMP1/BMP6/FGF18/FRZB/PKDCC/GREM1/RARB/RARG/MAF/CTGF	11
GO:0001952	regulation of cell-matrix adhesion	15/780	117/18493	0.000119639	0.000119639	0.00292682	POSTN/TEK/THY1/KDR/PTK2B/SERPINE1/BST1/GREM1/COL16A1/BCL6/MMP14/DDR1/SLC9A1/DAG1/ROCK1	15
GO:0010769	regulation of cell morphogenesis involved in differentiation	27/780	293/18493	0.000124868	0.000124868	0.00303552	POSTN/APOA1/NFATC4/THY1/CXCL12/SEMA3D/PLXNA4/UST/NTRK3/HECW2/HAS2/SEMA5A/NRCAM/NTRK2/SARM1/SLIT2/CAMK2B/CHN1/TNIK/BRSK2/FBLN1/SIPA1L1/BRSK1/PLXNA2/TRIM46/PLXNA1/PLXNB2	27
GO:0072109	glomerular mesangium development	5/780	13/18493	0.000127813	0.000127813	0.00308769	WT1/ACTA2/BMP7/EGR1/SERPINB7	5
GO:0046660	female sex differentiation	15/780	118/18493	0.000131824	0.000131824	0.00316482	KIT/WT1/PDGFRA/ZFPM2/NUPR1/PTX3/SLIT2/FZD4/INSR/MMP19/FOXL2/SLIT3/MMP14/LHFPL2/ICAM1	15
GO:0055074	calcium ion homeostasis	37/780	461/18493	0.000144015	0.000144015	0.00343614	BDKRB1/SLC24A3/CCL5/CD38/AGTR1/JPH1/CALB2/THY1/PDGFRA/C1QTNF1/PTGIR/CXCL12/JPH3/DRD1/PLN/ATP2A3/CXCR4/PTK2B/BDKRB2/CCRL2/S1PR3/TGM2/CEMIP/GRIN2B/RIC3/SYNPO/KCNK3/FYN/CD55/ANXA6/ATP2B4/DLG4/PKD1/STC2/FGF2/ATP2C1/KCTD17	37
GO:0090288	negative regulation of cellular response to growth factor stimulus	18/780	160/18493	0.000145577	0.000145577	0.0034521	SULF1/BMPER/EMILIN1/LDLRAD4/ADGRA2/CHRD/NRROS/SLIT2/DCN/TGFBR3/HTRA1/GREM1/CREB3L1/SNX25/FSTL3/GPC1/LTBP1/TWSG1	18
GO:0009100	glycoprotein metabolic process	33/780	394/18493	0.000148274	0.000148274	0.00349462	SULF1/ST6GALNAC5/XYLT1/B3GAT1/GFPT2/ST6GAL2/PTX3/CSPG4/UST/GALNT16/ST6GALNAC3/GALNT5/DCN/MGAT5/CHSY3/SPOCK2/B3GNT9/VEGFB/GALNT12/CHPF/MANBA/EXTL2/HS6ST1/B4GALT5/MAN2B2/CHPF2/GPC1/ARSB/PPARD/MGAT1/B4GALT1/ENTPD5/PMM1	33
GO:0009612	response to mechanical stimulus	21/780	204/18493	0.000151768	0.000151768	0.0035553	POSTN/COL3A1/PIEZO2/IL1B/BDKRB1/KIT/CXCL12/BMP6/PTK2B/ITGA2/MMP7/MEIS2/CASP1/DCN/COL1A1/FYN/MMP14/PKD1/MBD2/SLC9A1/DAG1	21
GO:0030204	chondroitin sulfate metabolic process	8/780	38/18493	0.000153303	0.000153303	0.00356963	XYLT1/CSPG4/DCN/CHSY3/SPOCK2/CHPF/CHPF2/ARSB	8
GO:0003413	chondrocyte differentiation involved in endochondral bone morphogenesis	7/780	29/18493	0.000159883	0.000159883	0.0036986	COL6A3/SCARA3/COL6A1/RARG/SERPINH1/COL6A2/ANXA6	7
GO:0090092	regulation of transmembrane receptor protein serine/threonine kinase signaling pathway	23/780	235/18493	0.000160756	0.000160756	0.0036986	SULF1/GDF6/MYOCD/BMPER/ITGA8/CRB2/BMP6/EMILIN1/LDLRAD4/CHRD/BMP7/NRROS/TGFBR3/HTRA1/GREM1/ZNF703/FOXD1/SNX25/SHH/FSTL3/LTBP1/DKK3/TWSG1	23
GO:0002367	cytokine production involved in immune response	13/780	95/18493	0.000173056	0.000173056	0.00393273	IL1B/KIT/APOA1/ANGPT1/TNFSF4/TNFRSF14/IL1R1/NR4A3/BCL6/CD55/TRIM6/GPRC5B/HK1	13
GO:0007044	cell-substrate junction assembly	13/780	95/18493	0.000173056	0.000173056	0.00393273	TEK/THY1/KDR/PTK2B/ITGA2/SORBS1/GREM1/COL16A1/TNS1/ITGA5/MMP14/SLC9A1/ROCK1	13
GO:0071229	cellular response to acid chemical	21/780	206/18493	0.000173985	0.000173985	0.00393273	COL3A1/COL1A2/NFATC4/PDGFRA/KDR/TNFSF4/NTRK3/PTK2B/EGR1/KLF2/NTRK2/OSR1/FZD4/RARB/COL6A1/ASS1/RARG/COL16A1/COL1A1/FYN/NDUFA13	21
GO:0007548	sex differentiation	25/780	268/18493	0.000181526	0.000181526	0.00407933	KIT/WT1/ROR2/PDGFRA/BMP6/ZFPM2/NUPR1/PTX3/OSR1/SLIT2/FZD4/REC8/INSR/MMP19/ADGRG1/GATA6/FOXL2/SLIT3/SHH/MMP14/FSTL3/LHFPL2/ICAM1/PKD1/BCL2L2	25
GO:0035051	cardiocyte differentiation	18/780	163/18493	0.000184246	0.000184246	0.00411653	HAND2/WT1/RGS4/TBX2/MYOCD/PDGFRA/HEY2/VCAM1/PITX2/TWIST1/BMP7/TGFBR3/SOX17/GREM1/RARB/GATA6/CTDP1/SLC9A1	18
GO:0030166	proteoglycan biosynthetic process	10/780	60/18493	0.000187175	0.000187175	0.00415793	XYLT1/B3GAT1/CSPG4/UST/DCN/CHSY3/CHPF/EXTL2/HS6ST1/CHPF2	10
GO:0003007	heart morphogenesis	24/780	253/18493	0.000188398	0.000188398	0.00416118	HAND2/TBX2/FOXF1/TEK/HEY2/ZFPM2/PITX2/TWIST1/BMP7/HAS2/COL5A1/SLIT2/DHRS3/TGFBR3/SOX17/HEG1/RARB/INSR/GATA6/NDRG4/SLIT3/SMARCD3/SHH/GAA	24
GO:0031532	actin cytoskeleton reorganization	13/780	96/18493	0.000192575	0.000192575	0.00422929	KIT/TEK/PDGFRA/NTRK3/FGF7/PTK2B/TNIK/BRSK2/SIPA1L1/S1PR2/RHOBTB2/ANTXR1/ATP2C1	13
GO:0050650	chondroitin sulfate proteoglycan biosynthetic process	7/780	30/18493	0.000201013	0.000201013	0.00438965	XYLT1/B3GAT1/CSPG4/DCN/CHSY3/CHPF/CHPF2	7
GO:0001654	eye development	30/780	351/18493	0.000206154	0.000206154	0.00447662	WT1/TBX2/EFEMP1/THY1/PDGFRA/MEIS1/TMOD1/BMP6/PITX2/TWIST1/BMP7/NTRK3/COL5A1/NTRK2/RHOJ/MEIS2/FZD4/ALDH1A3/MFAP2/RARB/RARG/CRYAB/MAF/FOXL2/RAB11FIP4/SMARCD3/SHH/ATP2B4/NAGLU/TWSG1	30
GO:0072163	mesonephric epithelium development	13/780	97/18493	0.000213953	0.000213953	0.00459437	WT1/BMPER/BMP7/OSR1/SLIT2/GREM1/RARB/KIF26B/FOXD1/SHH/GDNF/PKD1/FGF2	13
GO:0072164	mesonephric tubule development	13/780	97/18493	0.000213953	0.000213953	0.00459437	WT1/BMPER/BMP7/OSR1/SLIT2/GREM1/RARB/KIF26B/FOXD1/SHH/GDNF/PKD1/FGF2	13
GO:0150063	visual system development	30/780	352/18493	0.000216553	0.000216553	0.00460945	WT1/TBX2/EFEMP1/THY1/PDGFRA/MEIS1/TMOD1/BMP6/PITX2/TWIST1/BMP7/NTRK3/COL5A1/NTRK2/RHOJ/MEIS2/FZD4/ALDH1A3/MFAP2/RARB/RARG/CRYAB/MAF/FOXL2/RAB11FIP4/SMARCD3/SHH/ATP2B4/NAGLU/TWSG1	30
GO:0034330	cell junction organization	26/780	287/18493	0.000217041	0.000217041	0.00460945	CADM3/TEK/THY1/KDR/NFASC/PKP1/CADM2/PTK2B/ITGA2/CDH5/SORBS1/HEG1/GREM1/COL16A1/LIMS2/CD9/TNS1/ZNF703/CDH6/MAPRE2/ITGA5/PIP5K1C/MMP14/SLC9A1/NLGN2/ROCK1	26
GO:0050920	regulation of chemotaxis	21/780	210/18493	0.000227174	0.000227174	0.0047983	CCL5/IL16/PDGFRA/KDR/CXCL12/FGF18/ADGRA2/SEMA3D/PLXNA4/NTRK3/CXCR4/PTK2B/SEMA5A/SERPINE1/ITGA2/SLIT2/BST1/CCL26/GREM1/VEGFB/FGF2	21
GO:0001763	morphogenesis of a branching structure	20/780	196/18493	0.000242945	0.000242945	0.00510352	SULF1/WT1/FOXF1/NFATC4/HHIP/BMP7/FGF7/EGF/TGM2/SLIT2/GREM1/FOXD1/SHH/MMP14/GDNF/PKD1/DDR1/FGF2/DAG1/PLXNA1	20
GO:0048645	animal organ formation	10/780	62/18493	0.000247418	0.000247418	0.0051456	HAND2/SULF1/WT1/HOXC11/BMP7/SOX17/GATA6/SMARCD3/SHH/GDNF	10
GO:0003205	cardiac chamber development	18/780	167/18493	0.000249611	0.000249611	0.0051456	HAND2/TBX2/FOXF1/MYOCD/TEK/HEY2/ZFPM2/BMP7/SALL4/SLIT2/DHRS3/TGFBR3/HEG1/RARB/GATA6/SLIT3/SMARCD3/LTBP1	18
GO:0048168	regulation of neuronal synaptic plasticity	9/780	51/18493	0.000249633	0.000249633	0.0051456	KIT/JPH3/UNC13A/CAMK2B/RAB3A/SYNPO/DLG4/NCDN/UNC13B	9
GO:0043552	positive regulation of phosphatidylinositol 3-kinase activity	7/780	31/18493	0.000250273	0.000250273	0.0051456	FLT1/KIT/TEK/PDGFRA/TNFAIP8L3/PTK2B/FGF2	7
GO:2000146	negative regulation of cell motility	29/780	339/18493	0.000257507	0.000257507	0.00525873	COL3A1/PRKG1/SULF1/IL33/MYOCD/CD200/THY1/CXCL12/NRG3/EMILIN1/LDLRAD4/CHRD/SERPINE1/TMEFF2/SLIT2/DCN/DPYSL3/GREM1/ADARB1/ADGRG1/VASH1/FBLN1/NDRG4/HDAC5/SHH/BCR/PPARD/FGF2/DAG1	29
GO:0007492	endoderm development	11/780	74/18493	0.000258497	0.000258497	0.00525873	VTN/HOXC11/COL5A1/ITGA4/SOX17/COL6A1/GATA6/MMP15/ITGB5/ITGA5/MMP14	11
GO:0048880	sensory system development	30/780	357/18493	0.000275894	0.000275894	0.00557347	WT1/TBX2/EFEMP1/THY1/PDGFRA/MEIS1/TMOD1/BMP6/PITX2/TWIST1/BMP7/NTRK3/COL5A1/NTRK2/RHOJ/MEIS2/FZD4/ALDH1A3/MFAP2/RARB/RARG/CRYAB/MAF/FOXL2/RAB11FIP4/SMARCD3/SHH/ATP2B4/NAGLU/TWSG1	30
GO:0030336	negative regulation of cell migration	28/780	324/18493	0.000276852	0.000276852	0.00557347	COL3A1/PRKG1/SULF1/IL33/MYOCD/CD200/THY1/CXCL12/NRG3/EMILIN1/LDLRAD4/CHRD/SERPINE1/TMEFF2/SLIT2/DCN/DPYSL3/GREM1/ADARB1/ADGRG1/VASH1/NDRG4/HDAC5/SHH/BCR/PPARD/FGF2/DAG1	28
GO:0050727	regulation of inflammatory response	34/780	425/18493	0.000280672	0.000280672	0.00562109	IL1B/A2M/PTGIS/CCL5/IL33/AGTR1/FOXF1/APOA1/CD200/VTN/TEK/C1S/C4BPB/TNFSF4/NLRP1/TNFAIP6/MAPK13/SERPINE1/ITGA2/IL1R1/CDH5/C3/TGM2/BST1/FABP4/SLC7A2/NT5E/BCL6/METRNL/CD55/SMPDL3B/GPRC5B/BCR/PPARD	34
GO:0030195	negative regulation of blood coagulation	9/780	52/18493	0.000290739	0.000290739	0.00575011	PRKG1/FAP/VTN/TSPAN8/PDGFRA/C1QTNF1/SERPINE1/PLAT/CD9	9
GO:1900047	negative regulation of hemostasis	9/780	52/18493	0.000290739	0.000290739	0.00575011	PRKG1/FAP/VTN/TSPAN8/PDGFRA/C1QTNF1/SERPINE1/PLAT/CD9	9
GO:0007422	peripheral nervous system development	11/780	75/18493	0.000291577	0.000291577	0.00575011	HAND2/NFASC/PLXNA4/NTRK3/NTRK2/ADGRB2/ALDH3A2/GDNF/NAB2/GPC1/DAG1	11
GO:0007204	positive regulation of cytosolic calcium ion concentration	27/780	309/18493	0.0002966	0.0002966	0.00578661	BDKRB1/CD38/AGTR1/JPH1/THY1/PDGFRA/C1QTNF1/PTGIR/JPH3/DRD1/PLN/CXCR4/PTK2B/BDKRB2/CCRL2/S1PR3/TGM2/CEMIP/GRIN2B/RIC3/SYNPO/FYN/CD55/ATP2B4/DLG4/PKD1/FGF2	27
GO:0097529	myeloid leukocyte migration	20/780	199/18493	0.000297121	0.000297121	0.00578661	FLT1/IL1B/KIT/CCL5/CD200/ROR2/CXCL12/EMILIN1/PTK2B/SERPINE1/IL1R1/CCL20/SLIT2/BST1/CCL26/ITGA1/GREM1/VEGFB/PIP5K1C/MMP14	20
GO:0071900	regulation of protein serine/threonine kinase activity	38/780	496/18493	0.000299914	0.000299914	0.00578661	FLT1/CCNA1/IL1B/KIT/RGS4/MYOCD/ROR2/THY1/DIRAS3/FGF18/CSPG4/BMP7/NTRK3/CXCR4/C1QTNF2/PTK2B/GHR/EGF/FZD4/SHC2/CEMIP/TRIB2/DUSP2/ITGA1/KSR1/TNIK/INSR/SORL1/PKN1/GADD45G/ATP2B4/ERCC6/MAP2K3/INPP5K/S1PR2/MAPRE3/SMPD1/FGF2	38
GO:0003433	chondrocyte development involved in endochondral bone morphogenesis	6/780	23/18493	0.000300913	0.000300913	0.00578661	COL6A3/SCARA3/COL6A1/RARG/SERPINH1/COL6A2	6
GO:0060445	branching involved in salivary gland morphogenesis	6/780	23/18493	0.000300913	0.000300913	0.00578661	BMP7/FGF7/TGM2/SHH/DAG1/PLXNA1	6
GO:0001823	mesonephros development	13/780	101/18493	0.00032102	0.00032102	0.00611245	WT1/BMPER/BMP7/OSR1/SLIT2/GREM1/RARB/KIF26B/FOXD1/SHH/GDNF/PKD1/FGF2	13
GO:1904659	glucose transmembrane transport	13/780	101/18493	0.00032102	0.00032102	0.00611245	IL1B/DRD1/C1QTNF2/SLC2A2/SORBS1/C3/NR4A3/INSR/SLC2A5/SLC45A1/SORT1/INPP5K/PPARD	13
GO:0060326	cell chemotaxis	26/780	295/18493	0.000333562	0.000333562	0.00632012	FLT1/IL1B/KIT/CCL5/AGTR1/IL16/PDGFRA/KDR/CXCL12/FGF18/VCAM1/CXCR4/PTK2B/SEMA5A/SERPINE1/CCRL2/CCL20/SLIT2/BST1/CCL26/ITGA1/SAA4/GREM1/VEGFB/PIP5K1C/FGF2	26
GO:0046661	male sex differentiation	17/780	157/18493	0.000347778	0.000347778	0.00655733	KIT/WT1/ROR2/PDGFRA/BMP6/ZFPM2/NUPR1/REC8/INSR/ADGRG1/GATA6/SHH/MMP14/FSTL3/LHFPL2/ICAM1/BCL2L2	17
GO:0002791	regulation of peptide secretion	36/780	465/18493	0.000352094	0.000352094	0.00656401	POSTN/IL1B/CCL5/IL33/CD38/APOA1/CD200/STXBP5L/BMP6/CARD16/TWIST1/ANGPT1/TNFSF4/CD14/SSC5D/NLRP1/TNFRSF14/SYT7/SLC2A2/KCNS3/PANX2/CASP1/BRSK2/IL1A/SCAMP5/DPP4/TRIM6/APBB1/HK1/RAB11FIP5/UNC13B/PPARD/PANX1/NLGN2/C2CD2L/SIDT2	36
GO:0003206	cardiac chamber morphogenesis	15/780	129/18493	0.00035522	0.00035522	0.00656401	HAND2/TBX2/FOXF1/TEK/HEY2/ZFPM2/BMP7/SLIT2/DHRS3/TGFBR3/HEG1/RARB/GATA6/SLIT3/SMARCD3	15
GO:0072503	cellular divalent inorganic cation homeostasis	37/780	483/18493	0.000359194	0.000359194	0.00656401	BDKRB1/SLC24A3/CCL5/CD38/AGTR1/JPH1/CALB2/THY1/PDGFRA/C1QTNF1/PTGIR/CXCL12/JPH3/DRD1/PLN/ATP2A3/CXCR4/PTK2B/BDKRB2/CCRL2/S1PR3/TGM2/CEMIP/GRIN2B/RIC3/SYNPO/KCNK3/FYN/CD55/ANXA6/ATP2B4/DLG4/PKD1/STC2/FGF2/ATP2C1/KCTD17	37
GO:0001505	regulation of neurotransmitter levels	29/780	346/18493	0.000361668	0.000361668	0.00656401	IL1B/PTGIS/RGS4/STXBP5L/CADPS/DRD1/RIMS1/UPB1/PTX3/UNC13A/SARDH/PTK2B/SYT7/KLF2/SNCAIP/SLC7A2/ASS1/INSR/SLC22A3/RAB3A/KCNC4/BRSK1/PIP5K1C/SYT1/GDNF/ATP2B4/ICAM1/UNC13B/SNPH	29
GO:0010631	epithelial cell migration	29/780	346/18493	0.000361668	0.000361668	0.00656401	KIT/FAP/APOA1/BMPER/TEK/KDR/FGF18/ADGRA2/ANGPT1/FGF7/HAS2/PTK2B/SEMA5A/ITGA2/RHOJ/SLIT2/DCN/GREM1/MAPRE2/VASH1/PKN1/HDAC5/DPP4/AMOTL1/MAP2K3/SPARC/ARSB/PPARD/FGF2	29
GO:0060562	epithelial tube morphogenesis	27/780	313/18493	0.000363614	0.000363614	0.00656401	HAND2/WT1/TBX2/FOXF1/NFATC4/HHIP/TWIST1/BMP7/SALL4/OSR1/EGF/SLIT2/CTHRC1/SOX17/GREM1/RARG/NDRG4/KIF26B/FOXD1/SHH/MMP14/GDNF/PKD1/DDR1/FGF2/DAG1/PLXNB2	27
GO:0033627	cell adhesion mediated by integrin	10/780	65/18493	0.000367651	0.000367651	0.00656401	CCL5/VTN/SERPINE1/ITGA2/COL16A1/LPXN/DPP4/ITGB5/ITGA5/ICAM1	10
GO:0060389	pathway-restricted SMAD protein phosphorylation	10/780	65/18493	0.000367651	0.000367651	0.00656401	GDF6/BMPER/BMP6/EMILIN1/LDLRAD4/BMP7/TGFBR3/GREM1/SNX25/TWSG1	10
GO:0007015	actin filament organization	32/780	397/18493	0.000367835	0.000367835	0.00656401	RGS4/APOA1/SYNPO2L/TMOD1/PDLIM3/CXCL12/GAS7/ESPNL/LMOD1/RHOU/PTK2B/SEMA5A/SORBS1/RHOJ/TMEFF2/SLIT2/SYNPO2/DPYSL3/CCL26/SAMD14/SYNPO/CTGF/ITGB5/WIPF1/TPM2/INPP5K/RHOBTB2/ICAM1/SLC9A1/MICAL1/ROCK1/ARHGEF2	32
GO:0001503	ossification	31/780	380/18493	0.00036785	0.00036785	0.00656401	HAND2/XYLT1/DDR2/ROR2/TEK/MGP/BMP6/FGF18/TWIST1/CHRD/BMP7/PTK2B/OSR1/CTHRC1/PKDCC/DHRS3/GREM1/COL6A1/COL1A1/SORT1/CREB3L1/ANKH/CTGF/SHH/MMP14/FSTL3/SPARC/NAB2/MEF2D/MRC2/TWSG1	31
GO:0002718	regulation of cytokine production involved in immune response	11/780	77/18493	0.00036851	0.00036851	0.00656401	IL1B/APOA1/ANGPT1/TNFSF4/TNFRSF14/IL1R1/NR4A3/BCL6/TRIM6/GPRC5B/HK1	11
GO:0021675	nerve development	11/780	77/18493	0.00036851	0.00036851	0.00656401	SULF1/VCAM1/UNC13A/PLXNA4/MAFB/LRIG1/ITGA4/ADARB1/COL25A1/UNC13B/DAG1	11
GO:0003416	endochondral bone growth	8/780	43/18493	0.000377361	0.000377361	0.00664564	DDR2/COL6A3/SCARA3/RARB/COL6A1/RARG/COL6A2/ANXA6	8
GO:0042445	hormone metabolic process	21/780	218/18493	0.000377856	0.000377856	0.00664564	SULT1E1/IL1B/APOA1/SULT1B1/SCG5/PDGFRA/BMP6/GHR/EGR1/ALDH1A3/DHRS3/ALDH8A1/DHRS2/DIO2/RBP1/SHH/HSD17B11/STC2/RETSAT/DKK3/PCSK7	21
GO:0050679	positive regulation of epithelial cell proliferation	20/780	203/18493	0.000385612	0.000385612	0.00664564	CCL5/AGTR1/TEK/KDR/CXCL12/BMP6/TWIST1/FGF7/HAS2/SEMA5A/ITGA4/NR4A3/OSR1/HTRA1/CCL26/ZNF703/VEGFB/SHH/FGF2/B4GALT1	20
GO:0003418	growth plate cartilage chondrocyte differentiation	6/780	24/18493	0.000387009	0.000387009	0.00664564	COL6A3/SCARA3/COL6A1/RARG/COL6A2/ANXA6	6
GO:0030325	adrenal gland development	6/780	24/18493	0.000387009	0.000387009	0.00664564	WT1/APOA1/PDGFRA/INSR/FSTL3/DKK3	6
GO:0034035	purine ribonucleoside bisphosphate metabolic process	6/780	24/18493	0.000387009	0.000387009	0.00664564	SULT1E1/SULT1B1/PAPSS2/SULT1C4/SULT1A3/TPST1	6
GO:0050427	3'-phosphoadenosine 5'-phosphosulfate metabolic process	6/780	24/18493	0.000387009	0.000387009	0.00664564	SULT1E1/SULT1B1/PAPSS2/SULT1C4/SULT1A3/TPST1	6
GO:0061098	positive regulation of protein tyrosine kinase activity	9/780	54/18493	0.000389819	0.000389819	0.00664564	CCL5/DOK7/NTRK2/EGF/GREM1/FYN/GPRC5B/DLG4/ERCC6	9
GO:0090183	regulation of kidney development	9/780	54/18493	0.000389819	0.000389819	0.00664564	WT1/BMP7/EGR1/OSR1/GREM1/FOXD1/SERPINB7/SHH/GDNF	9
GO:0002739	regulation of cytokine secretion involved in immune response	5/780	16/18493	0.000390287	0.000390287	0.00664564	APOA1/ANGPT1/TNFRSF14/TRIM6/HK1	5
GO:0050806	positive regulation of synaptic transmission	17/780	159/18493	0.000403545	0.000403545	0.00684127	RGS4/CALB2/ROR2/CACNG7/DRD1/RIMS1/UNC13A/PTK2B/SYT7/CUBN/NTRK2/NSG1/GRIN2B/SYT1/DLG4/UNC13B/NLGN2	17
GO:0090132	epithelium migration	29/780	349/18493	0.000416697	0.000416697	0.00703338	KIT/FAP/APOA1/BMPER/TEK/KDR/FGF18/ADGRA2/ANGPT1/FGF7/HAS2/PTK2B/SEMA5A/ITGA2/RHOJ/SLIT2/DCN/GREM1/MAPRE2/VASH1/PKN1/HDAC5/DPP4/AMOTL1/MAP2K3/SPARC/ARSB/PPARD/FGF2	29
GO:0051480	regulation of cytosolic calcium ion concentration	29/780	350/18493	0.000436617	0.000436617	0.00733757	BDKRB1/CD38/AGTR1/JPH1/CALB2/THY1/PDGFRA/C1QTNF1/PTGIR/JPH3/DRD1/PLN/CXCR4/PTK2B/BDKRB2/CCRL2/S1PR3/TGM2/CEMIP/GRIN2B/RIC3/SYNPO/KCNK3/FYN/CD55/ATP2B4/DLG4/PKD1/FGF2	29
GO:0001755	neural crest cell migration	9/780	55/18493	0.000448907	0.000448907	0.00745042	HAND2/PITX2/SEMA3D/TWIST1/BMP7/SEMA5A/SHH/GDNF/ANXA6	9
GO:0035107	appendage morphogenesis	16/780	146/18493	0.000449115	0.000449115	0.00745042	HAND2/TBX2/PRRX1/ROR2/HOXC11/PITX1/TWIST1/BMP7/SALL4/OSR1/PKDCC/GREM1/RARB/RARG/SHH/PLXNA2	16
GO:0035108	limb morphogenesis	16/780	146/18493	0.000449115	0.000449115	0.00745042	HAND2/TBX2/PRRX1/ROR2/HOXC11/PITX1/TWIST1/BMP7/SALL4/OSR1/PKDCC/GREM1/RARB/RARG/SHH/PLXNA2	16
GO:0007045	cell-substrate adherens junction assembly	11/780	79/18493	0.000461808	0.000461808	0.00755052	TEK/THY1/KDR/PTK2B/ITGA2/SORBS1/GREM1/COL16A1/MMP14/SLC9A1/ROCK1	11
GO:0014855	striated muscle cell proliferation	11/780	79/18493	0.000461808	0.000461808	0.00755052	TBX2/MEIS1/HEY2/ZFPM2/ANGPT1/TGFBR3/GATA6/NDRG4/SHH/PPARD/FGF2	11
GO:0048041	focal adhesion assembly	11/780	79/18493	0.000461808	0.000461808	0.00755052	TEK/THY1/KDR/PTK2B/ITGA2/SORBS1/GREM1/COL16A1/MMP14/SLC9A1/ROCK1	11
GO:0003018	vascular process in circulatory system	17/780	161/18493	0.00046687	0.00046687	0.00755052	PRKG1/CD38/AGTR1/TEK/DRD1/ACTA2/CHRM3/ANGPT1/HRH2/BDKRB2/NPPB/SLIT2/ITGA1/HTR1D/ICAM1/BCR/PPARD	17
GO:0007519	skeletal muscle tissue development	17/780	161/18493	0.00046687	0.00046687	0.00755052	MYOCD/PITX1/NUPR1/TWIST1/POPDC2/MSC/CHRNA1/EGR1/MYH14/DCN/SOX17/DNER/FOXL2/MAFF/SHH/GPC1/MEF2D	17
GO:1990138	neuron projection extension	17/780	161/18493	0.00046687	0.00046687	0.00755052	POSTN/CXCL12/CACNG7/RIMS1/SEMA3D/UNC13A/PLXNA4/NTRK3/SEMA5A/ITGA4/NRCAM/SLIT2/SLIT3/SYT1/DDR1/TRIM46/PLXNA1	17
GO:0006939	smooth muscle contraction	13/780	105/18493	0.000470712	0.000470712	0.00758095	PRKG1/SULF1/KIT/CD38/MYOCD/DRD1/ACTA2/CHRM3/ITGA2/BDKRB2/HTR1D/GDNF/ROCK1	13
GO:0040013	negative regulation of locomotion	31/780	386/18493	0.000480238	0.000480238	0.00769286	COL3A1/PRKG1/SULF1/IL33/MYOCD/CD200/THY1/CXCL12/NRG3/EMILIN1/LDLRAD4/SEMA3D/CHRD/SEMA5A/SERPINE1/TMEFF2/SLIT2/DCN/DPYSL3/GREM1/ADARB1/ADGRG1/VASH1/FBLN1/NDRG4/HDAC5/SHH/BCR/PPARD/FGF2/DAG1	31
GO:0045137	development of primary sexual characteristics	21/780	222/18493	0.000481642	0.000481642	0.00769286	KIT/WT1/PDGFRA/ZFPM2/NUPR1/PTX3/OSR1/SLIT2/FZD4/REC8/INSR/MMP19/ADGRG1/GATA6/FOXL2/SLIT3/MMP14/FSTL3/LHFPL2/ICAM1/BCL2L2	21
GO:0006813	potassium ion transport	22/780	238/18493	0.000490558	0.000490558	0.00771802	SLC24A3/RGS4/DPP6/KCNK13/KCNG1/DRD1/KCNE4/KCNJ13/PTK2B/KCNJ12/KCNS3/KCNQ5/HCN2/KCNC3/KCNIP3/KCNC4/SLC9A5/KCNK3/SLC9A8/SLC12A8/SLC9A1/SLC12A4	22
GO:0034329	cell junction assembly	22/780	238/18493	0.000490558	0.000490558	0.00771802	TEK/THY1/KDR/NFASC/PKP1/PTK2B/ITGA2/CDH5/SORBS1/HEG1/GREM1/COL16A1/LIMS2/CD9/TNS1/ZNF703/CDH6/ITGA5/PIP5K1C/MMP14/SLC9A1/ROCK1	22
GO:0030206	chondroitin sulfate biosynthetic process	6/780	25/18493	0.000491204	0.000491204	0.00771802	XYLT1/CSPG4/DCN/CHSY3/CHPF/CHPF2	6
GO:0050927	positive regulation of positive chemotaxis	6/780	25/18493	0.000491204	0.000491204	0.00771802	IL16/KDR/CXCL12/NTRK3/ITGA2/VEGFB	6
GO:0051047	positive regulation of secretion	32/780	404/18493	0.000498012	0.000498012	0.00779331	POSTN/IL1B/IL33/CD38/C1QTNF1/CXCL12/BMP6/UNC13A/TWIST1/TNFSF4/CD14/NLRP1/TNFRSF14/SYT7/RAB27B/NPPB/PANX2/CASP1/RAB3A/IL1A/FOXL2/SCAMP5/TRIM6/SYT1/GDNF/APBB1/HK1/UNC13B/PPARD/PANX1/NLGN2/C2CD2L	32
GO:0050819	negative regulation of coagulation	9/780	56/18493	0.000515162	0.000515162	0.00801951	PRKG1/FAP/VTN/TSPAN8/PDGFRA/C1QTNF1/SERPINE1/PLAT/CD9	9
GO:0002063	chondrocyte development	8/780	45/18493	0.000520766	0.000520766	0.00801951	SULF1/COL6A3/FGF18/SCARA3/COL6A1/RARG/SERPINH1/COL6A2	8
GO:0010463	mesenchymal cell proliferation	8/780	45/18493	0.000520766	0.000520766	0.00801951	HAND2/FOXF1/PRRX1/CHRD/BMP7/FGF7/OSR1/SHH	8
GO:0098868	bone growth	8/780	45/18493	0.000520766	0.000520766	0.00801951	DDR2/COL6A3/SCARA3/RARB/COL6A1/RARG/COL6A2/ANXA6	8
GO:0090185	negative regulation of kidney development	5/780	17/18493	0.00053381	0.00053381	0.0081554	WT1/BMP7/OSR1/GREM1/SHH	5
GO:0097067	cellular response to thyroid hormone stimulus	5/780	17/18493	0.00053381	0.00053381	0.0081554	KIT/LMO2/KLF9/CTSB/GAS2L1	5
GO:0007435	salivary gland morphogenesis	7/780	35/18493	0.000552662	0.000552662	0.00837719	BMP7/FGF7/TGM2/SHH/TWSG1/DAG1/PLXNA1	7
GO:0090218	positive regulation of lipid kinase activity	7/780	35/18493	0.000552662	0.000552662	0.00837719	FLT1/KIT/TEK/PDGFRA/TNFAIP8L3/PTK2B/FGF2	7
GO:0042692	muscle cell differentiation	30/780	373/18493	0.000574375	0.000574375	0.00863856	KIT/WT1/RGS4/TBX2/FOXF1/MYOCD/NFATC4/ITGA8/PDGFRA/TMOD1/HEY2/TMEM204/PLPP7/LMOD1/GREM1/RARB/DNER/GATA6/HDAC5/SORT1/TNNT1/SMYD3/SMARCD3/SHH/SPEG/MMP14/CTDP1/DYRK1B/SLC9A1/ADAM12	30
GO:1903532	positive regulation of secretion by cell	30/780	373/18493	0.000574375	0.000574375	0.00863856	POSTN/IL33/CD38/C1QTNF1/CXCL12/BMP6/UNC13A/TWIST1/TNFSF4/CD14/NLRP1/TNFRSF14/SYT7/RAB27B/PANX2/CASP1/RAB3A/IL1A/FOXL2/SCAMP5/TRIM6/SYT1/GDNF/APBB1/HK1/UNC13B/PPARD/PANX1/NLGN2/C2CD2L	30
GO:0002687	positive regulation of leukocyte migration	14/780	121/18493	0.000580931	0.000580931	0.0086697	BDKRB1/CCL5/THY1/CXCL12/TNFRSF14/PTK2B/SERPINE1/ITGA2/ITGA4/IL1R1/CCL20/VEGFB/MMP14/ICAM1	14
GO:0046718	viral entry into host cell	14/780	121/18493	0.000580931	0.000580931	0.0086697	NCAM1/PTX3/CXCR4/TNFRSF14/ITGA2/TMPRSS2/DPP4/ITGB5/CD55/ITGA5/CTSB/ICAM1/TRIM62/DAG1	14
GO:0030500	regulation of bone mineralization	10/780	69/18493	0.000600209	0.000600209	0.00891865	DDR2/MGP/BMP6/TWIST1/BMP7/PTK2B/OSR1/PKDCC/GREM1/ANKH	10
GO:0000187	activation of MAPK activity	16/780	150/18493	0.000606388	0.000606388	0.00891865	IL1B/KIT/CSPG4/NTRK3/CXCR4/C1QTNF2/GHR/EGF/SHC2/ITGA1/INSR/PKN1/ERCC6/MAP2K3/S1PR2/FGF2	16
GO:0048754	branching morphogenesis of an epithelial tube	16/780	150/18493	0.000606388	0.000606388	0.00891865	WT1/FOXF1/NFATC4/HHIP/BMP7/EGF/SLIT2/GREM1/FOXD1/SHH/MMP14/GDNF/PKD1/DDR1/FGF2/DAG1	16
GO:0048588	developmental cell growth	21/780	226/18493	0.000609402	0.000609402	0.00891865	POSTN/RGS4/CXCL12/CACNG7/RIMS1/SEMA3D/UNC13A/PLXNA4/NTRK3/SEMA5A/ITGA4/NRCAM/SLIT2/RARG/FOXL2/SLIT3/SYT1/CTDP1/DDR1/TRIM46/PLXNA1	21
GO:0043406	positive regulation of MAP kinase activity	23/780	258/18493	0.000613954	0.000613954	0.00891865	FLT1/IL1B/KIT/ROR2/FGF18/CSPG4/NTRK3/CXCR4/C1QTNF2/PTK2B/GHR/EGF/FZD4/SHC2/ITGA1/TNIK/INSR/PKN1/GADD45G/ERCC6/MAP2K3/S1PR2/FGF2	23
GO:0050926	regulation of positive chemotaxis	6/780	26/18493	0.000615989	0.000615989	0.00891865	IL16/KDR/CXCL12/NTRK3/ITGA2/VEGFB	6
GO:0008645	hexose transmembrane transport	13/780	108/18493	0.00061852	0.00061852	0.00891865	IL1B/DRD1/C1QTNF2/SLC2A2/SORBS1/C3/NR4A3/INSR/SLC2A5/SLC45A1/SORT1/INPP5K/PPARD	13
GO:0071772	response to BMP	17/780	165/18493	0.000619552	0.000619552	0.00891865	SULF1/GDF6/BMPER/ROR2/CRB2/BMP6/CHRD/BMP7/EGR1/TGFBR3/HTRA1/GREM1/GATA6/FOXD1/FSTL3/FAM83G/TWSG1	17
[truncated: 929 more rows]

## Sheet: Supplemental_Table_S6
ID	Description	GeneRatio	BgRatio	pvalue	p.adjust	qvalue	geneID	Count
[truncated: 711 more rows]

[truncated: 7 more sheets: Supplemental_Table_S7, Supplemental_Table_S8, Supplemental_Table_S9, Supplemental_Table_S10, Supplemental_Table_S11, Supplemental_Table_S12, Supplemental_Table_S13]
